# Supplementary material for: Evaluation of the Mechanism of Jiedu Huazhuo Quyu Formula in Treating Wilson's Disease-Associated Liver Fibrosis by Network Pharmacology Analysis and Molecular Dynamics Simulation
Source: Evid Based Complement Alternat Med. 2022 Jun 6;2022:9363131. doi: 10.1155/2022/9363131 (PMC9192323; doi:10.1155/2022/9363131)
Supplement: Supplementary Materials — Supplementary Table 1. Details for each antibody. Supplementary Table 2. Details for compound-putative target network. Supplementary Table 3. Enrichment analysis results of 113 genes. Supplementary Table 4. MCODE and CytoNCA analysis. Supplementary Table 5. Enrichment analysis results of 6 core genes. Supplementary Table 6. Molecular docking results. [file 9363131.f1.zip]

Archive with 9 entries (9 files):
- 9363131.f1/Supplementary Table 1 WB.txt
- 9363131.f1/Supplementary Table 2.txt
- 9363131.f1/Supplementary Table 3 GO.txt
- 9363131.f1/Supplementary Table 3 KEGG.txt
- 9363131.f1/Supplementary Table 4 CytoNCA.txt
- 9363131.f1/Supplementary Table 4 MCODE.txt
- 9363131.f1/Supplementary Table 5 GO.txt
- 9363131.f1/Supplementary Table 5 KEGG.txt
- 9363131.f1/Supplementary Table 6.txt
