# Supplementary material for: Evaluation of the Mechanism of Jiedu Huazhuo Quyu Formula in Treating Wilson's Disease-Associated Liver Fibrosis by Network Pharmacology Analysis and Molecular Dynamics Simulation
Source: Evid Based Complement Alternat Med. 2022 Jun 6;2022:9363131. doi: 10.1155/2022/9363131 (PMC9192323; doi:10.1155/2022/9363131)
Supplement: Supplementary Materials — Supplementary Table 1. Details for each antibody. Supplementary Table 2. Details for compound-putative target network. Supplementary Table 3. Enrichment analysis results of 113 genes. Supplementary Table 4. MCODE and CytoNCA analysis. Supplementary Table 5. Enrichment analysis results of 6 core genes. Supplementary Table 6. Molecular docking results. [file 9363131.f1.zip › 9363131.f1/Supplementary Table 1 WB.txt]

Trade name	Manufacturer	Cargo number	Batch number	Molecular weight	Antibodies source	Dilution ratio
��-Actin	Zs-BIO	TA-09	19AW0505	42kDa	mouse	0.736111111
VEGFA	Affinity bioscience	AF5131	83m8093	30kDa	rabbit	0.388888889
AKT1	Affinity bioscience	AF0836	81q9251	55kDa	rabbit	0.736111111
IL-6	Affinity bioscience	DF6087	25a2866	24kDa	rabbit	0.388888889
IL-8	Affinity bioscience	DF6998	39v2741	11kDa	rabbit	0.388888889
ERK1/2	Affinity bioscience	BF8004	44w4852	42/44kDa	mouse	0.736111111
SRC	Affinity bioscience	AF6161	31f0906	60kDa	rabbit	0.736111111
