# Supplementary material for: Evaluation of the Mechanism of Jiedu Huazhuo Quyu Formula in Treating Wilson's Disease-Associated Liver Fibrosis by Network Pharmacology Analysis and Molecular Dynamics Simulation
Source: Evid Based Complement Alternat Med. 2022 Jun 6;2022:9363131. doi: 10.1155/2022/9363131 (PMC9192323; doi:10.1155/2022/9363131)
Supplement: Supplementary Materials — Supplementary Table 1. Details for each antibody. Supplementary Table 2. Details for compound-putative target network. Supplementary Table 3. Enrichment analysis results of 113 genes. Supplementary Table 4. MCODE and CytoNCA analysis. Supplementary Table 5. Enrichment analysis results of 6 core genes. Supplementary Table 6. Molecular docking results. [file 9363131.f1.zip › 9363131.f1/Supplementary Table 2.txt]

label	MOI ID	Molecule Name	OB	DL	herbs	Latin?name
EZ1	MOL000296	hederagenin	36.91	0.75	Ezhu	Curcumae Rhizoma
EZ2	MOL000906	wenjine	47.93	0.27	Ezhu	Curcumae Rhizoma
EZ3	MOL000940	bisdemethoxycurcumin	77.38	0.26	Ezhu	Curcumae Rhizoma
JQC1	MOL001689	acacetin	34.97	0.24	JiniQianCao	Lysimachiae Herba
JQC2	MOL001790	Linarin	39.84	0.71	JiniQianCao	Lysimachiae Herba
JQC3	MOL002341	Hesperetin	70.31	0.27	JiniQianCao	Lysimachiae Herba
JQC4	MOL000354	isorhamnetin	49.6	0.31	JiniQianCao	Lysimachiae Herba
JQC5	MOL000359	sitosterol	36.91	0.75	JiniQianCao	Lysimachiae Herba
JQC6	MOL000422	kaempferol	41.88	0.24	JiniQianCao	Lysimachiae Herba
JQC7	MOL005869	daucostero_qt	36.91	0.75	JiniQianCao	Lysimachiae Herba
JQC8	MOL000073	ent-Epicatechin	48.96	0.24	JiniQianCao	Lysimachiae Herba
JQC9	MOL007936	rhamnocitrin-3,4'-diglucOside	32.52	0.64	JiniQianCao	Lysimachiae Herba
JH1	MOL000449	Stigmasterol	43.83	0.76	JiangHuang	Curcumae Longae Rhizoma
JH2	MOL000493	campesterol	37.58	0.71	JiangHuang	Curcumae Longae Rhizoma
JH3	MOL000953	CLR	37.87	0.68	JiangHuang	Curcumae Longae Rhizoma
DH1	MOL002235	EUPATIN	50.8	0.41	DaHuang	Rhei Radix et Rhizoma
DH2	MOL002259	Physciondiglucoside	41.65	0.63	DaHuang	Rhei Radix et Rhizoma
DH3	MOL002268	rhein	47.07	0.28	DaHuang	Rhei Radix et Rhizoma
DH4	MOL002280	Torachrysone-8-O-beta-D-(6'-oxayl)-glucoside	43.02	0.74	DaHuang	Rhei Radix et Rhizoma
DH5	MOL002281	Toralactone	46.46	0.24	DaHuang	Rhei Radix et Rhizoma
DH6	MOL002288	Emodin-1-O-beta-D-glucopyranoside	44.81	0.8	DaHuang	Rhei Radix et Rhizoma
DH7	MOL002297	Daucosterol_qt	35.89	0.7	DaHuang	Rhei Radix et Rhizoma
DH8	MOL000358	beta-sitosterol	36.91	0.75	DaHuang	Rhei Radix et Rhizoma
DH9	MOL000471	aloe-emodin	83.38	0.24	DaHuang	Rhei Radix et Rhizoma
DH10	MOL000096	(-)-catechin	49.68	0.24	DaHuang	Rhei Radix et Rhizoma
DH11	MOL002251	Mutatochrome	48.64	0.61	DaHuang	Rhei Radix et Rhizoma
HL1	MOL001454	berberine	36.86	0.78	HuangLian	Coptidis Rhizoma
HL2	MOL002894	berberrubine	35.74	0.73	HuangLian	Coptidis Rhizoma
HL3	MOL002897	epiberberine	43.09	0.78	HuangLian	Coptidis Rhizoma
HL4	MOL002903	(R)-Canadine	55.37	0.77	HuangLian	Coptidis Rhizoma														0.19	6.57
HL5	MOL002904	Berlambine	36.68	0.82	HuangLian	Coptidis Rhizoma														0.31	-13.04
HL6	MOL002907	Corchoroside A_qt	104.95	0.78	HuangLian	Coptidis Rhizoma														0.24	6.46
HL7	MOL000622	Magnograndiolide	63.71	0.19	HuangLian	Coptidis Rhizoma														0.19	6.1
HL8	MOL000785	palmatine	64.6	0.65	HuangLian	Coptidis Rhizoma														0.2	6.41
HL9	MOL001458	coptisine	30.67	0.86	HuangLian	Coptidis Rhizoma														0.28	7.33
HL10	MOL002668	Worenine	45.83	0.87	HuangLian	Coptidis Rhizoma														0.29	6.68
HL11	MOL013352	Obacunone	43.29	0.77	HuangLian	Coptidis Rhizoma														0.3	3.17
HL12	MOL000762	Palmidin A	35.36	0.65	HuangLian	Coptidis Rhizoma														0.39	33.17
HL13	MOL018647	Moupinamide	86.71	0.26	HuangLian	Coptidis Rhizoma														0.13	2.25
DS1	MOL001601	1,2,5,6-tetrahydrotanshinone	38.75	0.36	DanShen	Salviae Miltiorrhizae Radix et Rhizoma														0.38	14.4
DS2	MOL001659	Poriferasterol	43.83	0.76	DanShen	Salviae Miltiorrhizae Radix et Rhizoma														0.26	9.33
DS3	MOL001771	poriferast-5-en-3beta-ol	36.91	0.75	DanShen	Salviae Miltiorrhizae Radix et Rhizoma														0.27	8.41
DS4	MOL001942	isoimperatorin	45.46	0.23	DanShen	Salviae Miltiorrhizae Radix et Rhizoma														0.33	3.71
DS5	MOL002222	sugiol	36.11	0.28	DanShen	Salviae Miltiorrhizae Radix et Rhizoma
DS6	MOL002651	Dehydrotanshinone II A	43.76	0.4	DanShen	Salviae Miltiorrhizae Radix et Rhizoma
DS7	MOL002776	Baicalin	40.12	0.75	DanShen	Salviae Miltiorrhizae Radix et Rhizoma
DS8	MOL000569	digallate	61.85	0.26	DanShen	Salviae Miltiorrhizae Radix et Rhizoma
DS9	MOL000006	luteolin	36.16	0.25	DanShen	Salviae Miltiorrhizae Radix et Rhizoma
DS10	MOL007036	5,6-dihydroxy-7-isopropyl-1,1-dimethyl-2,3-dihydrophenanthren-4-one	33.77	0.29	DanShen	Salviae Miltiorrhizae Radix et Rhizoma
DS11	MOL007041	2-isopropyl-8-methylphenanthrene-3,4-dione	40.86	0.23	DanShen	Salviae Miltiorrhizae Radix et Rhizoma
DS12	MOL007045	3¦Á-hydroxytanshinone¢òa	44.93	0.44	DanShen	Salviae Miltiorrhizae Radix et Rhizoma
DS13	MOL007048	(E)-3-[2-(3,4-dihydroxyphenyl)-7-hydroxy-benzofuran-4-yl]acrylic acid	48.24	0.31	DanShen	Salviae Miltiorrhizae Radix et Rhizoma
DS14	MOL007049	4-methylenemiltirone	34.35	0.23	DanShen	Salviae Miltiorrhizae Radix et Rhizoma
DS15	MOL007050	2-(4-hydroxy-3-methoxyphenyl)-5-(3-hydroxypropyl)-7-methoxy-3-benzofurancarboxaldehyde	62.78	0.4	DanShen	Salviae Miltiorrhizae Radix et Rhizoma
DS16	MOL007058	formyltanshinone	73.44	0.42	DanShen	Salviae Miltiorrhizae Radix et Rhizoma
DS17	MOL007059	3-beta-Hydroxymethyllenetanshiquinone	32.16	0.41	DanShen	Salviae Miltiorrhizae Radix et Rhizoma
DS18	MOL007061	Methylenetanshinquinone	37.07	0.36	DanShen	Salviae Miltiorrhizae Radix et Rhizoma
DS19	MOL007063	przewalskin a	37.11	0.65	DanShen	Salviae Miltiorrhizae Radix et Rhizoma
DS20	MOL007064	przewalskin b	110.32	0.44	DanShen	Salviae Miltiorrhizae Radix et Rhizoma
DS21	MOL007068	Przewaquinone B	62.24	0.41	DanShen	Salviae Miltiorrhizae Radix et Rhizoma
DS22	MOL007069	przewaquinone c	55.74	0.4	DanShen	Salviae Miltiorrhizae Radix et Rhizoma
DS23	MOL007070	(6S,7R)-6,7-dihydroxy-1,6-dimethyl-8,9-dihydro-7H-naphtho[8,7-g]benzofuran-10,11-dione	41.31	0.45	DanShen	Salviae Miltiorrhizae Radix et Rhizoma
DS24	MOL007071	przewaquinone f	40.31	0.46	DanShen	Salviae Miltiorrhizae Radix et Rhizoma
DS25	MOL007077	sclareol	43.67	0.21	DanShen	Salviae Miltiorrhizae Radix et Rhizoma
DS26	MOL007079	tanshinaldehyde	52.47	0.45	DanShen	Salviae Miltiorrhizae Radix et Rhizoma
DS27	MOL007081	Danshenol B	57.95	0.56	DanShen	Salviae Miltiorrhizae Radix et Rhizoma
DS28	MOL007082	Danshenol A	56.97	0.52	DanShen	Salviae Miltiorrhizae Radix et Rhizoma
DS29	MOL007085	Salvilenone	30.38	0.38	DanShen	Salviae Miltiorrhizae Radix et Rhizoma
DS30	MOL007088	cryptotanshinone	52.34	0.4	DanShen	Salviae Miltiorrhizae Radix et Rhizoma
DS31	MOL007093	dan-shexinkum d	38.88	0.55	DanShen	Salviae Miltiorrhizae Radix et Rhizoma
DS32	MOL007094	danshenspiroketallactone	50.43	0.31	DanShen	Salviae Miltiorrhizae Radix et Rhizoma
DS33	MOL007098	deoxyneocryptotanshinone	49.4	0.29	DanShen	Salviae Miltiorrhizae Radix et Rhizoma
DS34	MOL007100	dihydrotanshinlactone	38.68	0.32	DanShen	Salviae Miltiorrhizae Radix et Rhizoma
DS35	MOL007101	dihydrotanshinone¢ñ	45.04	0.36	DanShen	Salviae Miltiorrhizae Radix et Rhizoma
DS36	MOL007105	epidanshenspiroketallactone	68.27	0.31	DanShen	Salviae Miltiorrhizae Radix et Rhizoma
DS37	MOL007107	C09092	36.07	0.25	DanShen	Salviae Miltiorrhizae Radix et Rhizoma
DS38	MOL007108	isocryptotanshi-none	54.98	0.39	DanShen	Salviae Miltiorrhizae Radix et Rhizoma
DS39	MOL007111	Isotanshinone II	49.92	0.4	DanShen	Salviae Miltiorrhizae Radix et Rhizoma
DS40	MOL007115	manool	45.04	0.2	DanShen	Salviae Miltiorrhizae Radix et Rhizoma
DS41	MOL007119	miltionone ¢ñ	49.68	0.28	DanShen	Salviae Miltiorrhizae Radix et Rhizoma
DS42	MOL007120	miltionone ¢ò	71.03	0.32	DanShen	Salviae Miltiorrhizae Radix et Rhizoma
DS43	MOL007121	miltipolone	36.56	0.44	DanShen	Salviae Miltiorrhizae Radix et Rhizoma
DS44	MOL007122	Miltirone	38.76	0.37	DanShen	Salviae Miltiorrhizae Radix et Rhizoma
DS45	MOL007124	neocryptotanshinone ii	39.46	0.25	DanShen	Salviae Miltiorrhizae Radix et Rhizoma
DS46	MOL007125	neocryptotanshinone	52.49	0.23	DanShen	Salviae Miltiorrhizae Radix et Rhizoma
DS47	MOL007127	1-methyl-8,9-dihydro-7H-naphtho[5,6-g]benzofuran-6,10,11-trione	34.72	0.32	DanShen	Salviae Miltiorrhizae Radix et Rhizoma
DS48	MOL007130	prolithospermic acid	64.37	0.37	DanShen	Salviae Miltiorrhizae Radix et Rhizoma
DS49	MOL007132	(2R)-3-(3,4-dihydroxyphenyl)-2-[(Z)-3-(3,4-dihydroxyphenyl)acryloyl]oxy-propionic acid	109.38	0.31	DanShen	Salviae Miltiorrhizae Radix et Rhizoma
DS50	MOL007141	salvianolic acid g	45.56	0.61	DanShen	Salviae Miltiorrhizae Radix et Rhizoma
DS51	MOL007142	salvianolic acid j	43.38	0.72	DanShen	Salviae Miltiorrhizae Radix et Rhizoma
DS52	MOL007143	salvilenone ¢ñ	32.43	0.23	DanShen	Salviae Miltiorrhizae Radix et Rhizoma
DS53	MOL007145	salviolone	31.72	0.24	DanShen	Salviae Miltiorrhizae Radix et Rhizoma
DS54	MOL007150	(6S)-6-hydroxy-1-methyl-6-methylol-8,9-dihydro-7H-naphtho[8,7-g]benzofuran-10,11-quinone	75.39	0.46	DanShen	Salviae Miltiorrhizae Radix et Rhizoma
DS55	MOL007151	Tanshindiol B	42.67	0.45	DanShen	Salviae Miltiorrhizae Radix et Rhizoma
DS56	MOL007152	Przewaquinone E	42.85	0.45	DanShen	Salviae Miltiorrhizae Radix et Rhizoma
DS57	MOL007154	tanshinone iia	49.89	0.4	DanShen	Salviae Miltiorrhizae Radix et Rhizoma
DS58	MOL007155	(6S)-6-(hydroxymethyl)-1,6-dimethyl-8,9-dihydro-7H-naphtho[8,7-g]benzofuran-10,11-dione	65.26	0.45	DanShen	Salviae Miltiorrhizae Radix et Rhizoma
DS59	MOL007156	tanshinone ¢ö	45.64	0.3	DanShen	Salviae Miltiorrhizae Radix et Rhizoma
DS60	MOL006824	¦Á-amyrin	39.51	0.76	DanShen	Salviae Miltiorrhizae Radix et Rhizoma
DS61	MOL007118	microstegiol	39.61	0.35	DanShen	Salviae Miltiorrhizae Radix et Rhizoma
DS62	MOL007140	(Z)-3-[2-[(E)-2-(3,4-dihydroxyphenyl)vinyl]-3,4-dihydroxy-phenyl]acrylic acid	88.54	0.26	DanShen	Salviae Miltiorrhizae Radix et Rhizoma
DS63	MOL007149	NSC 122421	34.49	0.28	DanShen	Salviae Miltiorrhizae Radix et Rhizoma
A1	MOL000098	quercetin	46.43	0.28	JinQianCao¡¢HuangLian	Lysimachiae Herba¡¢Coptidis Rhizoma
