# Supplementary material for: Evaluation of the Mechanism of Jiedu Huazhuo Quyu Formula in Treating Wilson's Disease-Associated Liver Fibrosis by Network Pharmacology Analysis and Molecular Dynamics Simulation
Source: Evid Based Complement Alternat Med. 2022 Jun 6;2022:9363131. doi: 10.1155/2022/9363131 (PMC9192323; doi:10.1155/2022/9363131)
Supplement: Supplementary Materials — Supplementary Table 1. Details for each antibody. Supplementary Table 2. Details for compound-putative target network. Supplementary Table 3. Enrichment analysis results of 113 genes. Supplementary Table 4. MCODE and CytoNCA analysis. Supplementary Table 5. Enrichment analysis results of 6 core genes. Supplementary Table 6. Molecular docking results. [file 9363131.f1.zip › 9363131.f1/Supplementary Table 3 GO.txt]

id	num	pvalue	per	ratio	class	ID	Descrption	Pvalue	Qvalue	Up	Down	fg_num	bg_num
GO:1901700 response to oxygen-containing compound	74	3.68E-47	61.157	0.042	Biological Process	GO:1901700	response to oxygen-containing compound	3.68E-47	1.98E-43	0	0	74	1762
GO:0010033 response to organic substance	93	5.87E-45	76.86	0.026	Biological Process	GO:0010033	response to organic substance	5.87E-45	1.58E-41	0	0	93	3633
GO:0065008 regulation of biological quality	97	2.46E-42	80.165	0.022	Biological Process	GO:0065008	regulation of biological quality	2.46E-42	4.43E-39	0	0	97	4382
GO:0009719 response to endogenous stimulus	67	3.24E-39	55.372	0.038	Biological Process	GO:0009719	response to endogenous stimulus	3.24E-39	3.55E-36	0	0	67	1744
GO:0042221 response to chemical	101	3.29E-39	83.471	0.019	Biological Process	GO:0042221	response to chemical	3.29E-39	3.55E-36	0	0	101	5306
GO:0032879 regulation of localization	80	8.43E-37	66.116	0.026	Biological Process	GO:0032879	regulation of localization	8.43E-37	7.59E-34	0	0	80	3040
GO:0009605 response to external stimulus	77	2.17E-36	63.636	0.028	Biological Process	GO:0009605	response to external stimulus	2.17E-36	1.67E-33	0	0	77	2788
GO:0014070 response to organic cyclic compound	52	5.37E-36	42.975	0.053	Biological Process	GO:0014070	response to organic cyclic compound	5.37E-36	3.62E-33	0	0	52	980
GO:0051239 regulation of multicellular organismal process	84	6.50E-36	69.421	0.024	Biological Process	GO:0051239	regulation of multicellular organismal process	6.50E-36	3.90E-33	0	0	84	3545
GO:0065009 regulation of molecular function	84	1.42E-35	69.421	0.023	Biological Process	GO:0065009	regulation of molecular function	1.42E-35	7.65E-33	0	0	84	3581
GO:0023051 regulation of signaling	88	2.16E-35	72.727	0.022	Biological Process	GO:0023051	regulation of signaling	2.16E-35	1.06E-32	0	0	88	4058
GO:0070887 cellular response to chemical stimulus	83	3.86E-34	68.595	0.023	Biological Process	GO:0070887	cellular response to chemical stimulus	3.86E-34	1.74E-31	0	0	83	3627
GO:0071310 cellular response to organic substance	77	5.48E-34	63.636	0.026	Biological Process	GO:0071310	cellular response to organic substance	5.48E-34	2.28E-31	0	0	77	3015
GO:0033993 response to lipid	51	5.99E-34	42.149	0.05	Biological Process	GO:0033993	response to lipid	5.99E-34	2.31E-31	0	0	51	1021
GO:0051049 regulation of transport	66	6.61E-34	54.545	0.032	Biological Process	GO:0051049	regulation of transport	6.61E-34	2.38E-31	0	0	66	2040
GO:0010646 regulation of cell communication	86	8.66E-34	71.074	0.021	Biological Process	GO:0010646	regulation of cell communication	8.66E-34	2.92E-31	0	0	86	4009
GO:0042493 response to drug	52	1.38E-33	42.975	0.047	Biological Process	GO:0042493	response to drug	1.38E-33	4.39E-31	0	0	52	1096
GO:0009725 response to hormone	51	1.94E-33	42.149	0.049	Biological Process	GO:0009725	response to hormone	1.94E-33	5.81E-31	0	0	51	1046
GO:0009893 positive regulation of metabolic process	84	4.71E-33	69.421	0.022	Biological Process	GO:0009893	positive regulation of metabolic process	4.71E-33	1.34E-30	0	0	84	3863
GO:0008283 cell proliferation	68	6.62E-33	56.198	0.03	Biological Process	GO:0008283	cell proliferation	6.62E-33	1.79E-30	0	0	68	2286
GO:0009628 response to abiotic stimulus	55	8.85E-33	45.455	0.042	Biological Process	GO:0009628	response to abiotic stimulus	8.85E-33	2.28E-30	0	0	55	1324
GO:0010604 positive regulation of macromolecule metabolic process	81	1.02E-32	66.942	0.023	Biological Process	GO:0010604	positive regulation of macromolecule metabolic process	1.02E-32	2.49E-30	0	0	81	3565
GO:0023056 positive regulation of signaling	64	1.81E-32	52.893	0.032	Biological Process	GO:0023056	positive regulation of signaling	1.81E-32	4.24E-30	0	0	64	1992
GO:0009967 positive regulation of signal transduction	61	8.22E-32	50.413	0.034	Biological Process	GO:0009967	positive regulation of signal transduction	8.22E-32	1.85E-29	0	0	61	1809
GO:0008219 cell death	69	1.43E-31	57.025	0.028	Biological Process	GO:0008219	cell death	1.43E-31	3.06E-29	0	0	69	2491
GO:0010647 positive regulation of cell communication	63	1.47E-31	52.066	0.032	Biological Process	GO:0010647	positive regulation of cell communication	1.47E-31	3.06E-29	0	0	63	1984
GO:0010941 regulation of cell death	62	1.70E-31	51.24	0.032	Biological Process	GO:0010941	regulation of cell death	1.70E-31	3.40E-29	0	0	62	1910
GO:0051173 positive regulation of nitrogen compound metabolic process	78	2.62E-31	64.463	0.023	Biological Process	GO:0051173	positive regulation of nitrogen compound metabolic process	2.62E-31	5.04E-29	0	0	78	3399
GO:0051240 positive regulation of multicellular organismal process	63	2.78E-31	52.066	0.031	Biological Process	GO:0051240	positive regulation of multicellular organismal process	2.78E-31	5.18E-29	0	0	63	2006
GO:1902533 positive regulation of intracellular signal transduction	51	3.78E-31	42.149	0.044	Biological Process	GO:1902533	positive regulation of intracellular signal transduction	3.78E-31	6.80E-29	0	0	51	1167
GO:1901701 cellular response to oxygen-containing compound	52	4.26E-31	42.975	0.042	Biological Process	GO:1901701	cellular response to oxygen-containing compound	4.26E-31	7.42E-29	0	0	52	1232
GO:0031325 positive regulation of cellular metabolic process	79	4.57E-31	65.289	0.022	Biological Process	GO:0031325	positive regulation of cellular metabolic process	4.57E-31	7.70E-29	0	0	79	3534
GO:0051247 positive regulation of protein metabolic process	60	1.93E-30	49.587	0.033	Biological Process	GO:0051247	positive regulation of protein metabolic process	1.93E-30	3.15E-28	0	0	60	1836
GO:2000026 regulation of multicellular organismal development	65	4.67E-30	53.719	0.029	Biological Process	GO:2000026	regulation of multicellular organismal development	4.67E-30	7.42E-28	0	0	65	2276
GO:0042127 regulation of cell proliferation	60	5.93E-30	49.587	0.032	Biological Process	GO:0042127	regulation of cell proliferation	5.93E-30	9.14E-28	0	0	60	1874
GO:0048518 positive regulation of biological process	102	1.14E-29	84.298	0.015	Biological Process	GO:0048518	positive regulation of biological process	1.14E-29	1.71E-27	0	0	102	6883
GO:0043067 regulation of programmed cell death	58	1.73E-29	47.934	0.033	Biological Process	GO:0043067	regulation of programmed cell death	1.73E-29	2.52E-27	0	0	58	1756
GO:0044093 positive regulation of molecular function	60	2.05E-29	49.587	0.031	Biological Process	GO:0044093	positive regulation of molecular function	2.05E-29	2.91E-27	0	0	60	1917
GO:0032496 response to lipopolysaccharide	33	3.00E-29	27.273	0.088	Biological Process	GO:0032496	response to lipopolysaccharide	3.00E-29	4.16E-27	0	0	33	375
GO:0050793 regulation of developmental process	71	3.42E-29	58.678	0.024	Biological Process	GO:0050793	regulation of developmental process	3.42E-29	4.61E-27	0	0	71	2913
GO:0042981 regulation of apoptotic process	57	6.45E-29	47.107	0.033	Biological Process	GO:0042981	regulation of apoptotic process	6.45E-29	8.49E-27	0	0	57	1724
GO:0043085 positive regulation of catalytic activity	54	1.29E-28	44.628	0.035	Biological Process	GO:0043085	positive regulation of catalytic activity	1.29E-28	1.66E-26	0	0	54	1526
GO:0002237 response to molecule of bacterial origin	33	1.52E-28	27.273	0.084	Biological Process	GO:0002237	response to molecule of bacterial origin	1.52E-28	1.90E-26	0	0	33	394
GO:0045121 membrane raft	31	7.42E-29	25.41	0.093	Cellular Component	GO:0045121	membrane raft	7.42E-29	1.97E-26	0	0	31	334
GO:0098857 membrane microdomain	31	8.14E-29	25.41	0.093	Cellular Component	GO:0098857	membrane microdomain	8.14E-29	1.97E-26	0	0	31	335
GO:0010035 response to inorganic substance	38	1.66E-28	31.405	0.063	Biological Process	GO:0010035	response to inorganic substance	1.66E-28	2.04E-26	0	0	38	599
GO:0051050 positive regulation of transport	47	2.12E-28	38.843	0.044	Biological Process	GO:0051050	positive regulation of transport	2.12E-28	2.55E-26	0	0	47	1079
GO:0006915 apoptotic process	62	2.51E-28	51.24	0.029	Biological Process	GO:0006915	apoptotic process	2.51E-28	2.95E-26	0	0	62	2174
GO:0048522 positive regulation of cellular process	95	3.16E-28	78.512	0.016	Biological Process	GO:0048522	positive regulation of cellular process	3.16E-28	3.63E-26	0	0	95	5994
GO:0098589 membrane region	31	2.42E-28	25.41	0.089	Cellular Component	GO:0098589	membrane region	2.42E-28	3.91E-26	0	0	31	347
GO:0010243 response to organonitrogen compound	46	4.43E-28	38.017	0.044	Biological Process	GO:0010243	response to organonitrogen compound	4.43E-28	4.98E-26	0	0	46	1037
GO:0051094 positive regulation of developmental process	53	9.03E-28	43.802	0.035	Biological Process	GO:0051094	positive regulation of developmental process	9.03E-28	9.82E-26	0	0	53	1515
GO:0048584 positive regulation of response to stimulus	69	9.10E-28	57.025	0.024	Biological Process	GO:0048584	positive regulation of response to stimulus	9.10E-28	9.82E-26	0	0	69	2869
GO:0071407 cellular response to organic cyclic compound	37	9.83E-28	30.579	0.063	Biological Process	GO:0071407	cellular response to organic cyclic compound	9.83E-28	1.04E-25	0	0	37	583
GO:0071396 cellular response to lipid	39	1.20E-27	32.231	0.057	Biological Process	GO:0071396	cellular response to lipid	1.20E-27	1.25E-25	0	0	39	680
GO:0012501 programmed cell death	63	1.52E-27	52.066	0.027	Biological Process	GO:0012501	programmed cell death	1.52E-27	1.55E-25	0	0	63	2333
GO:0035556 intracellular signal transduction	72	1.61E-27	59.504	0.023	Biological Process	GO:0035556	intracellular signal transduction	1.61E-27	1.60E-25	0	0	72	3199
GO:0051246 regulation of protein metabolic process	72	1.88E-27	59.504	0.022	Biological Process	GO:0051246	regulation of protein metabolic process	1.88E-27	1.85E-25	0	0	72	3207
GO:0050790 regulation of catalytic activity	65	2.69E-27	53.719	0.026	Biological Process	GO:0050790	regulation of catalytic activity	2.69E-27	2.60E-25	0	0	65	2538
GO:1901698 response to nitrogen compound	47	2.74E-27	38.843	0.041	Biological Process	GO:1901698	response to nitrogen compound	2.74E-27	2.60E-25	0	0	47	1144
GO:0060548 negative regulation of cell death	47	3.08E-27	38.843	0.041	Biological Process	GO:0060548	negative regulation of cell death	3.08E-27	2.86E-25	0	0	47	1147
GO:1902531 regulation of intracellular signal transduction	60	3.35E-27	49.587	0.028	Biological Process	GO:1902531	regulation of intracellular signal transduction	3.35E-27	3.06E-25	0	0	60	2106
GO:0043069 negative regulation of programmed cell death	45	4.17E-27	37.19	0.044	Biological Process	GO:0043069	negative regulation of programmed cell death	4.17E-27	3.75E-25	0	0	45	1032
GO:0023052 signaling	103	5.24E-27	85.124	0.014	Biological Process	GO:0023052	signaling	5.24E-27	4.64E-25	0	0	103	7535
GO:0030335 positive regulation of cell migration	36	5.42E-27	29.752	0.064	Biological Process	GO:0030335	positive regulation of cell migration	5.42E-27	4.72E-25	0	0	36	566
GO:0009636 response to toxic substance	36	6.13E-27	29.752	0.063	Biological Process	GO:0009636	response to toxic substance	6.13E-27	5.25E-25	0	0	36	568
GO:0007154 cell communication	103	6.71E-27	85.124	0.014	Biological Process	GO:0007154	cell communication	6.71E-27	5.66E-25	0	0	103	7555
GO:0032268 regulation of cellular protein metabolic process	68	8.38E-27	56.198	0.024	Biological Process	GO:0032268	regulation of cellular protein metabolic process	8.38E-27	6.96E-25	0	0	68	2876
GO:0009966 regulation of signal transduction	75	1.33E-26	61.983	0.021	Biological Process	GO:0009966	regulation of signal transduction	1.33E-26	1.09E-24	0	0	75	3633
GO:0043066 negative regulation of apoptotic process	44	1.58E-26	36.364	0.044	Biological Process	GO:0043066	negative regulation of apoptotic process	1.58E-26	1.27E-24	0	0	44	1005
GO:2000147 positive regulation of cell motility	36	2.16E-26	29.752	0.061	Biological Process	GO:2000147	positive regulation of cell motility	2.16E-26	1.71E-24	0	0	36	589
GO:0010562 positive regulation of phosphorus metabolic process	47	3.25E-26	38.843	0.039	Biological Process	GO:0010562	positive regulation of phosphorus metabolic process	3.25E-26	2.50E-24	0	0	47	1211
GO:0045937 positive regulation of phosphate metabolic process	47	3.25E-26	38.843	0.039	Biological Process	GO:0045937	positive regulation of phosphate metabolic process	3.25E-26	2.50E-24	0	0	47	1211
GO:0018108 peptidyl-tyrosine phosphorylation	31	3.93E-26	25.62	0.08	Biological Process	GO:0018108	peptidyl-tyrosine phosphorylation	3.93E-26	2.99E-24	0	0	31	389
GO:0046903 secretion	56	4.43E-26	46.281	0.03	Biological Process	GO:0046903	secretion	4.43E-26	3.30E-24	0	0	56	1876
GO:0032270 positive regulation of cellular protein metabolic process	54	4.47E-26	44.628	0.031	Biological Process	GO:0032270	positive regulation of cellular protein metabolic process	4.47E-26	3.30E-24	0	0	54	1719
GO:0018212 peptidyl-tyrosine modification	31	4.97E-26	25.62	0.079	Biological Process	GO:0018212	peptidyl-tyrosine modification	4.97E-26	3.62E-24	0	0	31	392
GO:0042592 homeostatic process	58	5.06E-26	47.934	0.028	Biological Process	GO:0042592	homeostatic process	5.06E-26	3.64E-24	0	0	58	2045
GO:0062013 positive regulation of small molecule metabolic process	23	5.12E-26	19.008	0.152	Biological Process	GO:0062013	positive regulation of small molecule metabolic process	5.12E-26	3.64E-24	0	0	23	151
GO:0051272 positive regulation of cellular component movement	36	5.45E-26	29.752	0.06	Biological Process	GO:0051272	positive regulation of cellular component movement	5.45E-26	3.82E-24	0	0	36	605
GO:0048731 system development	87	6.91E-26	71.901	0.017	Biological Process	GO:0048731	system development	6.91E-26	4.78E-24	0	0	87	5218
GO:0007166 cell surface receptor signaling pathway	73	1.00E-25	60.331	0.021	Biological Process	GO:0007166	cell surface receptor signaling pathway	1.00E-25	6.87E-24	0	0	73	3524
GO:0040017 positive regulation of locomotion	36	1.34E-25	29.752	0.058	Biological Process	GO:0040017	positive regulation of locomotion	1.34E-25	9.03E-24	0	0	36	621
GO:0010942 positive regulation of cell death	39	2.23E-25	32.231	0.05	Biological Process	GO:0010942	positive regulation of cell death	2.23E-25	1.48E-23	0	0	39	783
GO:0006950 response to stress	83	2.27E-25	68.595	0.017	Biological Process	GO:0006950	response to stress	2.27E-25	1.49E-23	0	0	83	4766
GO:0032502 developmental process	97	3.16E-25	80.165	0.014	Biological Process	GO:0032502	developmental process	3.16E-25	2.06E-23	0	0	97	6830
GO:0048519 negative regulation of biological process	92	3.58E-25	76.033	0.015	Biological Process	GO:0048519	negative regulation of biological process	3.58E-25	2.30E-23	0	0	92	6054
GO:0071216 cellular response to biotic stimulus	27	4.16E-25	22.314	0.097	Biological Process	GO:0071216	cellular response to biotic stimulus	4.16E-25	2.64E-23	0	0	27	277
GO:0032101 regulation of response to external stimulus	43	5.87E-25	35.537	0.042	Biological Process	GO:0032101	regulation of response to external stimulus	5.87E-25	3.69E-23	0	0	43	1036
GO:0043410 positive regulation of MAPK cascade	35	6.19E-25	28.926	0.058	Biological Process	GO:0043410	positive regulation of MAPK cascade	6.19E-25	3.84E-23	0	0	35	601
GO:0009653 anatomical structure morphogenesis	66	6.57E-25	54.545	0.023	Biological Process	GO:0009653	anatomical structure morphogenesis	6.57E-25	4.03E-23	0	0	66	2892
GO:0035295 tube development	45	6.94E-25	37.19	0.039	Biological Process	GO:0035295	tube development	6.94E-25	4.21E-23	0	0	45	1167
GO:0010648 negative regulation of cell communication	50	8.59E-25	41.322	0.033	Biological Process	GO:0010648	negative regulation of cell communication	8.59E-25	5.15E-23	0	0	50	1520
GO:0048583 regulation of response to stimulus	85	9.27E-25	70.248	0.017	Biological Process	GO:0048583	regulation of response to stimulus	9.27E-25	5.50E-23	0	0	85	5126
GO:0023057 negative regulation of signaling	50	9.67E-25	41.322	0.033	Biological Process	GO:0023057	negative regulation of signaling	9.67E-25	5.68E-23	0	0	50	1524
GO:0060341 regulation of cellular localization	41	1.11E-24	33.884	0.044	Biological Process	GO:0060341	regulation of cellular localization	1.11E-24	6.45E-23	0	0	41	932
GO:0018193 peptidyl-amino acid modification	47	1.45E-24	38.843	0.036	Biological Process	GO:0018193	peptidyl-amino acid modification	1.45E-24	8.32E-23	0	0	47	1323
GO:0019220 regulation of phosphate metabolic process	55	1.46E-24	45.455	0.029	Biological Process	GO:0019220	regulation of phosphate metabolic process	1.46E-24	8.32E-23	0	0	55	1929
GO:0051174 regulation of phosphorus metabolic process	55	1.54E-24	45.455	0.028	Biological Process	GO:0051174	regulation of phosphorus metabolic process	1.54E-24	8.66E-23	0	0	55	1931
GO:0030154 cell differentiation	80	2.46E-24	66.116	0.018	Biological Process	GO:0030154	cell differentiation	2.46E-24	1.37E-22	0	0	80	4541
GO:0043068 positive regulation of programmed cell death	37	2.50E-24	30.579	0.051	Biological Process	GO:0043068	positive regulation of programmed cell death	2.50E-24	1.38E-22	0	0	37	728
GO:0042327 positive regulation of phosphorylation	44	2.56E-24	36.364	0.039	Biological Process	GO:0042327	positive regulation of phosphorylation	2.56E-24	1.39E-22	0	0	44	1139
GO:0009611 response to wounding	37	3.03E-24	30.579	0.051	Biological Process	GO:0009611	response to wounding	3.03E-24	1.63E-22	0	0	37	732
GO:0009891 positive regulation of biosynthetic process	57	3.39E-24	47.107	0.027	Biological Process	GO:0009891	positive regulation of biosynthetic process	3.39E-24	1.81E-22	0	0	57	2132
GO:0034614 cellular response to reactive oxygen species	23	3.42E-24	19.008	0.128	Biological Process	GO:0034614	cellular response to reactive oxygen species	3.42E-24	1.81E-22	0	0	23	180
GO:0001934 positive regulation of protein phosphorylation	43	3.66E-24	35.537	0.04	Biological Process	GO:0001934	positive regulation of protein phosphorylation	3.66E-24	1.92E-22	0	0	43	1085
GO:0035239 tube morphogenesis	41	4.17E-24	33.884	0.042	Biological Process	GO:0035239	tube morphogenesis	4.17E-24	2.16E-22	0	0	41	965
GO:0032940 secretion by cell	52	4.28E-24	42.975	0.03	Biological Process	GO:0032940	secretion by cell	4.28E-24	2.20E-22	0	0	52	1729
GO:0007275 multicellular organism development	89	7.10E-24	73.554	0.015	Biological Process	GO:0007275	multicellular organism development	7.10E-24	3.62E-22	0	0	89	5836
GO:0048523 negative regulation of cellular process	85	9.16E-24	70.248	0.016	Biological Process	GO:0048523	negative regulation of cellular process	9.16E-24	4.62E-22	0	0	85	5289
GO:0048869 cellular developmental process	81	9.61E-24	66.942	0.017	Biological Process	GO:0048869	cellular developmental process	9.61E-24	4.80E-22	0	0	81	4760
GO:0000302 response to reactive oxygen species	25	1.00E-23	20.661	0.102	Biological Process	GO:0000302	response to reactive oxygen species	1.00E-23	4.92E-22	0	0	25	246
GO:0071222 cellular response to lipopolysaccharide	25	1.00E-23	20.661	0.102	Biological Process	GO:0071222	cellular response to lipopolysaccharide	1.00E-23	4.92E-22	0	0	25	246
GO:0032800 receptor biosynthetic process	14	1.01E-23	11.57	0.452	Biological Process	GO:0032800	receptor biosynthetic process	1.01E-23	4.93E-22	0	0	14	31
GO:0010628 positive regulation of gene expression	56	1.21E-23	46.281	0.027	Biological Process	GO:0010628	positive regulation of gene expression	1.21E-23	5.85E-22	0	0	56	2100
GO:0030334 regulation of cell migration	41	1.23E-23	33.884	0.041	Biological Process	GO:0030334	regulation of cell migration	1.23E-23	5.88E-22	0	0	41	993
GO:0071495 cellular response to endogenous stimulus	48	1.33E-23	39.669	0.033	Biological Process	GO:0071495	cellular response to endogenous stimulus	1.33E-23	6.29E-22	0	0	48	1466
GO:0048585 negative regulation of response to stimulus	53	1.45E-23	43.802	0.029	Biological Process	GO:0048585	negative regulation of response to stimulus	1.45E-23	6.83E-22	0	0	53	1856
GO:0062012 regulation of small molecule metabolic process	31	1.54E-23	25.62	0.065	Biological Process	GO:0062012	regulation of small molecule metabolic process	1.54E-23	7.18E-22	0	0	31	474
GO:0048856 anatomical structure development	92	1.66E-23	76.033	0.014	Biological Process	GO:0048856	anatomical structure development	1.66E-23	7.65E-22	0	0	92	6352
GO:0032501 multicellular organismal process	104	1.72E-23	85.95	0.012	Biological Process	GO:0032501	multicellular organismal process	1.72E-23	7.85E-22	0	0	104	8418
GO:0048513 animal organ development	73	1.77E-23	60.331	0.019	Biological Process	GO:0048513	animal organ development	1.77E-23	8.03E-22	0	0	73	3825
GO:0043408 regulation of MAPK cascade	38	1.88E-23	31.405	0.046	Biological Process	GO:0043408	regulation of MAPK cascade	1.88E-23	8.34E-22	0	0	38	827
GO:0042325 regulation of phosphorylation	51	1.88E-23	42.149	0.03	Biological Process	GO:0042325	regulation of phosphorylation	1.88E-23	8.34E-22	0	0	51	1706
GO:0050896 response to stimulus	114	1.88E-23	94.215	0.011	Biological Process	GO:0050896	response to stimulus	1.88E-23	8.34E-22	0	0	114	10643
GO:0043065 positive regulation of apoptotic process	36	1.98E-23	29.752	0.05	Biological Process	GO:0043065	positive regulation of apoptotic process	1.98E-23	8.71E-22	0	0	36	719
GO:0001932 regulation of protein phosphorylation	49	2.09E-23	40.496	0.031	Biological Process	GO:0001932	regulation of protein phosphorylation	2.09E-23	9.10E-22	0	0	49	1556
GO:0051704 multi-organism process	65	2.13E-23	53.719	0.022	Biological Process	GO:0051704	multi-organism process	2.13E-23	9.21E-22	0	0	65	2971
GO:0071219 cellular response to molecule of bacterial origin	25	2.24E-23	20.661	0.098	Biological Process	GO:0071219	cellular response to molecule of bacterial origin	2.24E-23	9.60E-22	0	0	25	254
GO:0043491 protein kinase B signaling	26	3.03E-23	21.488	0.09	Biological Process	GO:0043491	protein kinase B signaling	3.03E-23	1.29E-21	0	0	26	290
GO:0045834 positive regulation of lipid metabolic process	21	4.55E-23	17.355	0.141	Biological Process	GO:0045834	positive regulation of lipid metabolic process	4.55E-23	1.92E-21	0	0	21	149
GO:0071900 regulation of protein serine/threonine kinase activity	32	4.87E-23	26.446	0.059	Biological Process	GO:0071900	regulation of protein serine/threonine kinase activity	4.87E-23	2.04E-21	0	0	32	538
GO:0031399 regulation of protein modification process	54	5.60E-23	44.628	0.027	Biological Process	GO:0031399	regulation of protein modification process	5.60E-23	2.31E-21	0	0	54	1994
GO:0035094 response to nicotine	16	5.60E-23	13.223	0.281	Biological Process	GO:0035094	response to nicotine	5.60E-23	2.31E-21	0	0	16	57
GO:0051338 regulation of transferase activity	41	6.77E-23	33.884	0.039	Biological Process	GO:0051338	regulation of transferase activity	6.77E-23	2.77E-21	0	0	41	1039
GO:0018105 peptidyl-serine phosphorylation	26	7.92E-23	21.488	0.086	Biological Process	GO:0018105	peptidyl-serine phosphorylation	7.92E-23	3.22E-21	0	0	26	301
GO:0031328 positive regulation of cellular biosynthetic process	55	8.41E-23	45.455	0.026	Biological Process	GO:0031328	positive regulation of cellular biosynthetic process	8.41E-23	3.39E-21	0	0	55	2097
GO:0048545 response to steroid hormone	29	1.05E-22	23.967	0.069	Biological Process	GO:0048545	response to steroid hormone	1.05E-22	4.19E-21	0	0	29	419
GO:0051716 cellular response to stimulus	104	1.12E-22	85.95	0.012	Biological Process	GO:0051716	cellular response to stimulus	1.12E-22	4.45E-21	0	0	104	8591
GO:0001505 regulation of neurotransmitter levels	28	1.15E-22	23.14	0.074	Biological Process	GO:0001505	regulation of neurotransmitter levels	1.15E-22	4.53E-21	0	0	28	380
GO:2000145 regulation of cell motility	41	1.24E-22	33.884	0.039	Biological Process	GO:2000145	regulation of cell motility	1.24E-22	4.87E-21	0	0	41	1056
GO:0006810 transport	87	1.46E-22	71.901	0.015	Biological Process	GO:0006810	transport	1.46E-22	5.68E-21	0	0	87	5779
GO:0016477 cell migration	50	1.57E-22	41.322	0.029	Biological Process	GO:0016477	cell migration	1.57E-22	6.06E-21	0	0	50	1708
GO:0033674 positive regulation of kinase activity	33	1.69E-22	27.273	0.054	Biological Process	GO:0033674	positive regulation of kinase activity	1.69E-22	6.47E-21	0	0	33	609
GO:0045860 positive regulation of protein kinase activity	32	1.84E-22	26.446	0.057	Biological Process	GO:0045860	positive regulation of protein kinase activity	1.84E-22	7.01E-21	0	0	32	562
GO:0051270 regulation of cellular component movement	42	2.47E-22	34.711	0.037	Biological Process	GO:0051270	regulation of cellular component movement	2.47E-22	9.33E-21	0	0	42	1141
GO:0051235 maintenance of location	27	3.41E-22	22.314	0.076	Biological Process	GO:0051235	maintenance of location	3.41E-22	1.28E-20	0	0	27	356
GO:0048468 cell development	56	5.12E-22	46.281	0.025	Biological Process	GO:0048468	cell development	5.12E-22	1.91E-20	0	0	56	2267
GO:0018209 peptidyl-serine modification	26	5.24E-22	21.488	0.08	Biological Process	GO:0018209	peptidyl-serine modification	5.24E-22	1.93E-20	0	0	26	324
GO:0045859 regulation of protein kinase activity	37	5.26E-22	30.579	0.044	Biological Process	GO:0045859	regulation of protein kinase activity	5.26E-22	1.93E-20	0	0	37	850
GO:0031401 positive regulation of protein modification process	44	6.57E-22	36.364	0.034	Biological Process	GO:0031401	positive regulation of protein modification process	6.57E-22	2.40E-20	0	0	44	1309
GO:0032880 regulation of protein localization	41	6.76E-22	33.884	0.037	Biological Process	GO:0032880	regulation of protein localization	6.76E-22	2.45E-20	0	0	41	1105
GO:0051234 establishment of localization	87	7.28E-22	71.901	0.015	Biological Process	GO:0051234	establishment of localization	7.28E-22	2.62E-20	0	0	87	5906
GO:0034599 cellular response to oxidative stress	26	1.14E-21	21.488	0.078	Biological Process	GO:0034599	cellular response to oxidative stress	1.14E-21	4.06E-20	0	0	26	334
GO:0010001 glial cell differentiation	23	1.29E-21	19.008	0.099	Biological Process	GO:0010001	glial cell differentiation	1.29E-21	4.57E-20	0	0	23	232
GO:0043549 regulation of kinase activity	38	1.34E-21	31.405	0.041	Biological Process	GO:0043549	regulation of kinase activity	1.34E-21	4.74E-20	0	0	38	934
GO:0007165 signal transduction	94	1.36E-21	77.686	0.013	Biological Process	GO:0007165	signal transduction	1.36E-21	4.77E-20	0	0	94	7039
GO:0042133 neurotransmitter metabolic process	21	1.48E-21	17.355	0.12	Biological Process	GO:0042133	neurotransmitter metabolic process	1.48E-21	5.15E-20	0	0	21	175
GO:1901564 organonitrogen compound metabolic process	98	1.63E-21	80.992	0.013	Biological Process	GO:1901564	organonitrogen compound metabolic process	1.63E-21	5.64E-20	0	0	98	7732
GO:0051179 localization	96	1.75E-21	79.339	0.013	Biological Process	GO:0051179	localization	1.75E-21	6.02E-20	0	0	96	7394
GO:0008284 positive regulation of cell proliferation	40	2.09E-21	33.058	0.037	Biological Process	GO:0008284	positive regulation of cell proliferation	2.09E-21	7.15E-20	0	0	40	1073
GO:0050730 regulation of peptidyl-tyrosine phosphorylation	24	2.32E-21	19.835	0.089	Biological Process	GO:0050730	regulation of peptidyl-tyrosine phosphorylation	2.32E-21	7.87E-20	0	0	24	271
GO:1904035 regulation of epithelial cell apoptotic process	18	2.92E-21	14.876	0.167	Biological Process	GO:1904035	regulation of epithelial cell apoptotic process	2.92E-21	9.84E-20	0	0	18	108
GO:0040012 regulation of locomotion	41	3.07E-21	33.884	0.036	Biological Process	GO:0040012	regulation of locomotion	3.07E-21	1.03E-19	0	0	41	1151
GO:0045935 positive regulation of nucleobase-containing compound metabolic process	52	3.68E-21	42.975	0.026	Biological Process	GO:0045935	positive regulation of nucleobase-containing compound metabolic process	3.68E-21	1.23E-19	0	0	52	2004
GO:0051046 regulation of secretion	37	3.82E-21	30.579	0.041	Biological Process	GO:0051046	regulation of secretion	3.82E-21	1.26E-19	0	0	37	901
GO:0071902 positive regulation of protein serine/threonine kinase activity	26	4.01E-21	21.488	0.074	Biological Process	GO:0071902	positive regulation of protein serine/threonine kinase activity	4.01E-21	1.32E-19	0	0	26	351
GO:2000351 regulation of endothelial cell apoptotic process	16	4.71E-21	13.223	0.219	Biological Process	GO:2000351	regulation of endothelial cell apoptotic process	4.71E-21	1.54E-19	0	0	16	73
GO:0032147 activation of protein kinase activity	26	4.98E-21	21.488	0.073	Biological Process	GO:0032147	activation of protein kinase activity	4.98E-21	1.61E-19	0	0	26	354
GO:0070371 ERK1 and ERK2 cascade	26	4.98E-21	21.488	0.073	Biological Process	GO:0070371	ERK1 and ERK2 cascade	4.98E-21	1.61E-19	0	0	26	354
GO:0097191 extrinsic apoptotic signaling pathway	23	5.43E-21	19.008	0.093	Biological Process	GO:0097191	extrinsic apoptotic signaling pathway	5.43E-21	1.74E-19	0	0	23	247
GO:0035690 cellular response to drug	27	5.57E-21	22.314	0.068	Biological Process	GO:0035690	cellular response to drug	5.57E-21	1.78E-19	0	0	27	396
GO:0000165 MAPK cascade	39	6.41E-21	32.231	0.037	Biological Process	GO:0000165	MAPK cascade	6.41E-21	2.04E-19	0	0	39	1041
GO:0009617 response to bacterium	36	6.52E-21	29.752	0.042	Biological Process	GO:0009617	response to bacterium	6.52E-21	2.06E-19	0	0	36	855
GO:2001233 regulation of apoptotic signaling pathway	28	6.88E-21	23.14	0.063	Biological Process	GO:2001233	regulation of apoptotic signaling pathway	6.88E-21	2.16E-19	0	0	28	442
GO:0051347 positive regulation of transferase activity	33	7.07E-21	27.273	0.048	Biological Process	GO:0051347	positive regulation of transferase activity	7.07E-21	2.21E-19	0	0	33	687
GO:0070997 neuron death	27	7.73E-21	22.314	0.067	Biological Process	GO:0070997	neuron death	7.73E-21	2.40E-19	0	0	27	401
GO:0043405 regulation of MAP kinase activity	26	8.17E-21	21.488	0.072	Biological Process	GO:0043405	regulation of MAP kinase activity	8.17E-21	2.51E-19	0	0	26	361
GO:0007267 cell-cell signaling	49	8.19E-21	40.496	0.027	Biological Process	GO:0007267	cell-cell signaling	8.19E-21	2.51E-19	0	0	49	1786
GO:0042063 gliogenesis	25	8.62E-21	20.661	0.077	Biological Process	GO:0042063	gliogenesis	8.62E-21	2.63E-19	0	0	25	323
GO:0048870 cell motility	50	8.78E-21	41.322	0.027	Biological Process	GO:0048870	cell motility	8.78E-21	2.65E-19	0	0	50	1872
GO:0051674 localization of cell	50	8.78E-21	41.322	0.027	Biological Process	GO:0051674	localization of cell	8.78E-21	2.65E-19	0	0	50	1872
GO:0009968 negative regulation of signal transduction	44	9.19E-21	36.364	0.031	Biological Process	GO:0009968	negative regulation of signal transduction	9.19E-21	2.76E-19	0	0	44	1400
GO:0023014 signal transduction by protein phosphorylation	39	9.30E-21	32.231	0.037	Biological Process	GO:0023014	signal transduction by protein phosphorylation	9.30E-21	2.77E-19	0	0	39	1052
GO:0051241 negative regulation of multicellular organismal process	44	1.09E-20	36.364	0.031	Biological Process	GO:0051241	negative regulation of multicellular organismal process	1.09E-20	3.22E-19	0	0	44	1406
GO:0014065 phosphatidylinositol 3-kinase signaling	20	1.18E-20	16.529	0.121	Biological Process	GO:0014065	phosphatidylinositol 3-kinase signaling	1.18E-20	3.48E-19	0	0	20	165
GO:0006468 protein phosphorylation	53	1.26E-20	43.802	0.025	Biological Process	GO:0006468	protein phosphorylation	1.26E-20	3.70E-19	0	0	53	2148
GO:0006979 response to oxidative stress	29	1.36E-20	23.967	0.058	Biological Process	GO:0006979	response to oxidative stress	1.36E-20	3.97E-19	0	0	29	499
GO:0080134 regulation of response to stress	50	1.49E-20	41.322	0.026	Biological Process	GO:0080134	regulation of response to stress	1.49E-20	4.33E-19	0	0	50	1895
GO:0072577 endothelial cell apoptotic process	16	1.50E-20	13.223	0.205	Biological Process	GO:0072577	endothelial cell apoptotic process	1.50E-20	4.33E-19	0	0	16	78
GO:2001237 negative regulation of extrinsic apoptotic signaling pathway	18	1.83E-20	14.876	0.151	Biological Process	GO:2001237	negative regulation of extrinsic apoptotic signaling pathway	1.83E-20	5.26E-19	0	0	18	119
GO:0051896 regulation of protein kinase B signaling	23	2.09E-20	19.008	0.088	Biological Process	GO:0051896	regulation of protein kinase B signaling	2.09E-20	5.96E-19	0	0	23	262
GO:0048015 phosphatidylinositol-mediated signaling	21	2.29E-20	17.355	0.106	Biological Process	GO:0048015	phosphatidylinositol-mediated signaling	2.29E-20	6.51E-19	0	0	21	199
GO:0042136 neurotransmitter biosynthetic process	18	2.93E-20	14.876	0.148	Biological Process	GO:0042136	neurotransmitter biosynthetic process	2.93E-20	8.27E-19	0	0	18	122
GO:0070201 regulation of establishment of protein localization	35	2.98E-20	28.926	0.042	Biological Process	GO:0070201	regulation of establishment of protein localization	2.98E-20	8.37E-19	0	0	35	835
GO:0048017 inositol lipid-mediated signaling	21	3.14E-20	17.355	0.104	Biological Process	GO:0048017	inositol lipid-mediated signaling	3.14E-20	8.79E-19	0	0	21	202
GO:0022603 regulation of anatomical structure morphogenesis	41	3.52E-20	33.884	0.033	Biological Process	GO:0022603	regulation of anatomical structure morphogenesis	3.52E-20	9.80E-19	0	0	41	1230
GO:1903530 regulation of secretion by cell	35	3.61E-20	28.926	0.042	Biological Process	GO:1903530	regulation of secretion by cell	3.61E-20	9.99E-19	0	0	35	840
GO:0045595 regulation of cell differentiation	51	4.25E-20	42.149	0.025	Biological Process	GO:0045595	regulation of cell differentiation	4.25E-20	1.17E-18	0	0	51	2028
GO:0050731 positive regulation of peptidyl-tyrosine phosphorylation	21	4.29E-20	17.355	0.102	Biological Process	GO:0050731	positive regulation of peptidyl-tyrosine phosphorylation	4.29E-20	1.17E-18	0	0	21	205
GO:1903829 positive regulation of cellular protein localization	25	4.29E-20	20.661	0.072	Biological Process	GO:1903829	positive regulation of cellular protein localization	4.29E-20	1.17E-18	0	0	25	345
GO:0051128 regulation of cellular component organization	58	4.62E-20	47.934	0.022	Biological Process	GO:0051128	regulation of cellular component organization	4.62E-20	1.25E-18	0	0	58	2684
GO:0048871 multicellular organismal homeostasis	29	4.69E-20	23.967	0.056	Biological Process	GO:0048871	multicellular organismal homeostasis	4.69E-20	1.26E-18	0	0	29	522
GO:0009888 tissue development	53	4.70E-20	43.802	0.024	Biological Process	GO:0009888	tissue development	4.70E-20	1.26E-18	0	0	53	2211
GO:0040011 locomotion	52	4.90E-20	42.975	0.024	Biological Process	GO:0040011	locomotion	4.90E-20	1.31E-18	0	0	52	2123
GO:0022008 neurogenesis	47	5.50E-20	38.843	0.028	Biological Process	GO:0022008	neurogenesis	5.50E-20	1.46E-18	0	0	47	1702
GO:0043406 positive regulation of MAP kinase activity	23	7.39E-20	19.008	0.083	Biological Process	GO:0043406	positive regulation of MAP kinase activity	7.39E-20	1.96E-18	0	0	23	277
GO:0006954 inflammatory response	37	7.95E-20	30.579	0.038	Biological Process	GO:0006954	inflammatory response	7.95E-20	2.09E-18	0	0	37	986
GO:0044092 negative regulation of molecular function	41	9.52E-20	33.884	0.032	Biological Process	GO:0044092	negative regulation of molecular function	9.52E-20	2.50E-18	0	0	41	1264
GO:1904019 epithelial cell apoptotic process	18	9.61E-20	14.876	0.138	Biological Process	GO:1904019	epithelial cell apoptotic process	9.61E-20	2.51E-18	0	0	18	130
GO:1905953 negative regulation of lipid localization	15	9.66E-20	12.397	0.217	Biological Process	GO:1905953	negative regulation of lipid localization	9.66E-20	2.51E-18	0	0	15	69
GO:0048646 anatomical structure formation involved in morphogenesis	41	1.01E-19	33.884	0.032	Biological Process	GO:0048646	anatomical structure formation involved in morphogenesis	1.01E-19	2.61E-18	0	0	41	1266
GO:0019899 enzyme binding	56	3.87E-21	45.902	0.024	Molecular Function	GO:0019899	enzyme binding	3.87E-21	2.65E-18	0	0	56	2367
GO:0001775 cell activation	47	1.10E-19	38.843	0.027	Biological Process	GO:0001775	cell activation	1.10E-19	2.82E-18	0	0	47	1731
GO:0010557 positive regulation of macromolecule biosynthetic process	50	1.18E-19	41.322	0.025	Biological Process	GO:0010557	positive regulation of macromolecule biosynthetic process	1.18E-19	3.02E-18	0	0	50	1988
GO:0031323 regulation of cellular metabolic process	90	1.28E-19	74.38	0.013	Biological Process	GO:0031323	regulation of cellular metabolic process	1.28E-19	3.26E-18	0	0	90	6803
GO:0051897 positive regulation of protein kinase B signaling	20	1.35E-19	16.529	0.108	Biological Process	GO:0051897	positive regulation of protein kinase B signaling	1.35E-19	3.41E-18	0	0	20	186
GO:2000379 positive regulation of reactive oxygen species metabolic process	17	1.52E-19	14.05	0.155	Biological Process	GO:2000379	positive regulation of reactive oxygen species metabolic process	1.52E-19	3.84E-18	0	0	17	110
GO:0070374 positive regulation of ERK1 and ERK2 cascade	22	1.71E-19	18.182	0.087	Biological Process	GO:0070374	positive regulation of ERK1 and ERK2 cascade	1.71E-19	4.28E-18	0	0	22	252
GO:0097190 apoptotic signaling pathway	31	1.96E-19	25.62	0.047	Biological Process	GO:0097190	apoptotic signaling pathway	1.96E-19	4.90E-18	0	0	31	654
GO:0048699 generation of neurons	45	1.98E-19	37.19	0.028	Biological Process	GO:0048699	generation of neurons	1.98E-19	4.92E-18	0	0	45	1594
GO:0019216 regulation of lipid metabolic process	26	2.53E-19	21.488	0.063	Biological Process	GO:0019216	regulation of lipid metabolic process	2.53E-19	6.27E-18	0	0	26	414
GO:0045893 positive regulation of transcription, DNA-templated	45	2.65E-19	37.19	0.028	Biological Process	GO:0045893	positive regulation of transcription, DNA-templated	2.65E-19	6.54E-18	0	0	45	1606
GO:0071417 cellular response to organonitrogen compound	30	2.84E-19	24.793	0.049	Biological Process	GO:0071417	cellular response to organonitrogen compound	2.84E-19	6.97E-18	0	0	30	609
GO:0072593 reactive oxygen species metabolic process	23	3.30E-19	19.008	0.078	Biological Process	GO:0072593	reactive oxygen species metabolic process	3.30E-19	8.07E-18	0	0	23	296
GO:0006629 lipid metabolic process	44	3.33E-19	36.364	0.029	Biological Process	GO:0006629	lipid metabolic process	3.33E-19	8.07E-18	0	0	44	1536
GO:0014066 regulation of phosphatidylinositol 3-kinase signaling	18	3.33E-19	14.876	0.129	Biological Process	GO:0014066	regulation of phosphatidylinositol 3-kinase signaling	3.33E-19	8.07E-18	0	0	18	139
GO:0051171 regulation of nitrogen compound metabolic process	88	3.40E-19	72.727	0.013	Biological Process	GO:0051171	regulation of nitrogen compound metabolic process	3.40E-19	8.19E-18	0	0	88	6580
GO:0001660 fever generation	10	3.56E-19	8.264	0.625	Biological Process	GO:0001660	fever generation	3.56E-19	8.54E-18	0	0	10	16
GO:1901615 organic hydroxy compound metabolic process	29	3.70E-19	23.967	0.052	Biological Process	GO:1901615	organic hydroxy compound metabolic process	3.70E-19	8.83E-18	0	0	29	563
GO:1903508 positive regulation of nucleic acid-templated transcription	46	3.72E-19	38.017	0.027	Biological Process	GO:1903508	positive regulation of nucleic acid-templated transcription	3.72E-19	8.84E-18	0	0	46	1701
GO:1902680 positive regulation of RNA biosynthetic process	46	3.80E-19	38.017	0.027	Biological Process	GO:1902680	positive regulation of RNA biosynthetic process	3.80E-19	9.00E-18	0	0	46	1702
GO:0070372 regulation of ERK1 and ERK2 cascade	24	3.92E-19	19.835	0.071	Biological Process	GO:0070372	regulation of ERK1 and ERK2 cascade	3.92E-19	9.23E-18	0	0	24	337
GO:1905952 regulation of lipid localization	19	3.95E-19	15.702	0.114	Biological Process	GO:1905952	regulation of lipid localization	3.95E-19	9.27E-18	0	0	19	167
GO:0048511 rhythmic process	23	4.14E-19	19.008	0.077	Biological Process	GO:0048511	rhythmic process	4.14E-19	9.68E-18	0	0	23	299
GO:0051223 regulation of protein transport	33	4.28E-19	27.273	0.042	Biological Process	GO:0051223	regulation of protein transport	4.28E-19	9.96E-18	0	0	33	786
GO:0051960 regulation of nervous system development	36	4.35E-19	29.752	0.037	Biological Process	GO:0051960	regulation of nervous system development	4.35E-19	1.01E-17	0	0	36	972
GO:0048732 gland development	27	4.42E-19	22.314	0.058	Biological Process	GO:0048732	gland development	4.42E-19	1.01E-17	0	0	27	469
GO:0050804 modulation of chemical synaptic transmission	27	4.42E-19	22.314	0.058	Biological Process	GO:0050804	modulation of chemical synaptic transmission	4.42E-19	1.01E-17	0	0	27	469
GO:0014068 positive regulation of phosphatidylinositol 3-kinase signaling	16	4.42E-19	13.223	0.168	Biological Process	GO:0014068	positive regulation of phosphatidylinositol 3-kinase signaling	4.42E-19	1.01E-17	0	0	16	95
GO:0099177 regulation of trans-synaptic signaling	27	4.67E-19	22.314	0.057	Biological Process	GO:0099177	regulation of trans-synaptic signaling	4.67E-19	1.06E-17	0	0	27	470
GO:0010469 regulation of signaling receptor activity	31	5.07E-19	25.62	0.046	Biological Process	GO:0010469	regulation of signaling receptor activity	5.07E-19	1.15E-17	0	0	31	676
GO:0034097 response to cytokine	42	6.19E-19	34.711	0.03	Biological Process	GO:0034097	response to cytokine	6.19E-19	1.40E-17	0	0	42	1406
GO:2001236 regulation of extrinsic apoptotic signaling pathway	19	6.23E-19	15.702	0.111	Biological Process	GO:2001236	regulation of extrinsic apoptotic signaling pathway	6.23E-19	1.40E-17	0	0	19	171
GO:0002376 immune system process	68	6.58E-19	56.198	0.017	Biological Process	GO:0002376	immune system process	6.58E-19	1.47E-17	0	0	68	3933
GO:0006928 movement of cell or subcellular component	53	6.79E-19	43.802	0.023	Biological Process	GO:0006928	movement of cell or subcellular component	6.79E-19	1.51E-17	0	0	53	2346
GO:0009056 catabolic process	58	6.89E-19	47.934	0.02	Biological Process	GO:0009056	catabolic process	6.89E-19	1.53E-17	0	0	58	2837
GO:0005102 signaling receptor binding	50	4.79E-20	40.984	0.026	Molecular Function	GO:0005102	signaling receptor binding	4.79E-20	1.64E-17	0	0	50	1950
GO:0050767 regulation of neurogenesis	34	7.94E-19	28.099	0.039	Biological Process	GO:0050767	regulation of neurogenesis	7.94E-19	1.76E-17	0	0	34	863
GO:0006801 superoxide metabolic process	15	8.74E-19	12.397	0.19	Biological Process	GO:0006801	superoxide metabolic process	8.74E-19	1.93E-17	0	0	15	79
GO:0010817 regulation of hormone levels	29	9.53E-19	23.967	0.05	Biological Process	GO:0010817	regulation of hormone levels	9.53E-19	2.09E-17	0	0	29	583
GO:0051336 regulation of hydrolase activity	42	9.88E-19	34.711	0.029	Biological Process	GO:0051336	regulation of hydrolase activity	9.88E-19	2.16E-17	0	0	42	1424
GO:0043112 receptor metabolic process	20	1.05E-18	16.529	0.097	Biological Process	GO:0043112	receptor metabolic process	1.05E-18	2.28E-17	0	0	20	206
GO:0010888 negative regulation of lipid storage	11	1.06E-18	9.091	0.44	Biological Process	GO:0010888	negative regulation of lipid storage	1.06E-18	2.29E-17	0	0	11	25
GO:0033135 regulation of peptidyl-serine phosphorylation	18	1.06E-18	14.876	0.122	Biological Process	GO:0033135	regulation of peptidyl-serine phosphorylation	1.06E-18	2.29E-17	0	0	18	148
GO:0060284 regulation of cell development	36	1.09E-18	29.752	0.036	Biological Process	GO:0060284	regulation of cell development	1.09E-18	2.35E-17	0	0	36	1000
GO:0007169 transmembrane receptor protein tyrosine kinase signaling pathway	32	1.20E-18	26.446	0.042	Biological Process	GO:0007169	transmembrane receptor protein tyrosine kinase signaling pathway	1.20E-18	2.57E-17	0	0	32	754
GO:0008202 steroid metabolic process	24	1.23E-18	19.835	0.068	Biological Process	GO:0008202	steroid metabolic process	1.23E-18	2.62E-17	0	0	24	354
GO:0090087 regulation of peptide transport	33	1.42E-18	27.273	0.04	Biological Process	GO:0090087	regulation of peptide transport	1.42E-18	3.03E-17	0	0	33	818
GO:0009991 response to extracellular stimulus	28	1.47E-18	23.14	0.052	Biological Process	GO:0009991	response to extracellular stimulus	1.47E-18	3.12E-17	0	0	28	541
GO:0099536 synaptic signaling	32	1.76E-18	26.446	0.042	Biological Process	GO:0099536	synaptic signaling	1.76E-18	3.72E-17	0	0	32	764
GO:0009607 response to biotic stimulus	39	1.88E-18	32.231	0.032	Biological Process	GO:0009607	response to biotic stimulus	1.88E-18	3.94E-17	0	0	39	1225
GO:0080090 regulation of primary metabolic process	88	2.11E-18	72.727	0.013	Biological Process	GO:0080090	regulation of primary metabolic process	2.11E-18	4.41E-17	0	0	88	6748
GO:1901214 regulation of neuron death	24	2.49E-18	19.835	0.066	Biological Process	GO:1901214	regulation of neuron death	2.49E-18	5.18E-17	0	0	24	365
GO:0003008 system process	53	2.52E-18	43.802	0.022	Biological Process	GO:0003008	system process	2.52E-18	5.21E-17	0	0	53	2416
GO:0017144 drug metabolic process	34	2.52E-18	28.099	0.038	Biological Process	GO:0017144	drug metabolic process	2.52E-18	5.21E-17	0	0	34	896
GO:0030162 regulation of proteolysis	35	2.59E-18	28.926	0.036	Biological Process	GO:0030162	regulation of proteolysis	2.59E-18	5.33E-17	0	0	35	961
GO:0050890 cognition	23	2.67E-18	19.008	0.071	Biological Process	GO:0050890	cognition	2.67E-18	5.49E-17	0	0	23	325
GO:2001234 negative regulation of apoptotic signaling pathway	21	2.71E-18	17.355	0.084	Biological Process	GO:2001234	negative regulation of apoptotic signaling pathway	2.71E-18	5.54E-17	0	0	21	250
GO:0033619 membrane protein proteolysis	14	3.12E-18	11.57	0.209	Biological Process	GO:0033619	membrane protein proteolysis	3.12E-18	6.36E-17	0	0	14	67
GO:0016310 phosphorylation	55	3.24E-18	45.455	0.021	Biological Process	GO:0016310	phosphorylation	3.24E-18	6.57E-17	0	0	55	2625
GO:0031667 response to nutrient levels	27	3.38E-18	22.314	0.053	Biological Process	GO:0031667	response to nutrient levels	3.38E-18	6.84E-17	0	0	27	508
GO:0051254 positive regulation of RNA metabolic process	46	3.49E-18	38.017	0.026	Biological Process	GO:0051254	positive regulation of RNA metabolic process	3.49E-18	7.02E-17	0	0	46	1800
GO:0007167 enzyme linked receptor protein signaling pathway	37	3.80E-18	30.579	0.033	Biological Process	GO:0007167	enzyme linked receptor protein signaling pathway	3.80E-18	7.62E-17	0	0	37	1108
GO:0060429 epithelium development	41	3.90E-18	33.884	0.029	Biological Process	GO:0060429	epithelium development	3.90E-18	7.79E-17	0	0	41	1401
GO:0030155 regulation of cell adhesion	32	4.51E-18	26.446	0.041	Biological Process	GO:0030155	regulation of cell adhesion	4.51E-18	8.99E-17	0	0	32	789
GO:0038034 signal transduction in absence of ligand	15	4.92E-18	12.397	0.17	Biological Process	GO:0038034	signal transduction in absence of ligand	4.92E-18	9.72E-17	0	0	15	88
GO:0097192 extrinsic apoptotic signaling pathway in absence of ligand	15	4.92E-18	12.397	0.17	Biological Process	GO:0097192	extrinsic apoptotic signaling pathway in absence of ligand	4.92E-18	9.72E-17	0	0	15	88
GO:0045073 regulation of chemokine biosynthetic process	11	5.03E-18	9.091	0.393	Biological Process	GO:0045073	regulation of chemokine biosynthetic process	5.03E-18	9.90E-17	0	0	11	28
GO:1901216 positive regulation of neuron death	16	5.19E-18	13.223	0.145	Biological Process	GO:1901216	positive regulation of neuron death	5.19E-18	1.02E-16	0	0	16	110
GO:0031622 positive regulation of fever generation	9	5.72E-18	7.438	0.692	Biological Process	GO:0031622	positive regulation of fever generation	5.72E-18	1.12E-16	0	0	9	13
GO:0046209 nitric oxide metabolic process	15	5.88E-18	12.397	0.169	Biological Process	GO:0046209	nitric oxide metabolic process	5.88E-18	1.15E-16	0	0	15	89
GO:0002521 leukocyte differentiation	28	6.04E-18	23.14	0.049	Biological Process	GO:0002521	leukocyte differentiation	6.04E-18	1.17E-16	0	0	28	571
GO:1904951 positive regulation of establishment of protein localization	27	6.41E-18	22.314	0.052	Biological Process	GO:1904951	positive regulation of establishment of protein localization	6.41E-18	1.24E-16	0	0	27	521
GO:0060627 regulation of vesicle-mediated transport	28	6.61E-18	23.14	0.049	Biological Process	GO:0060627	regulation of vesicle-mediated transport	6.61E-18	1.27E-16	0	0	28	573
GO:0019932 second-messenger-mediated signaling	26	6.80E-18	21.488	0.055	Biological Process	GO:0019932	second-messenger-mediated signaling	6.80E-18	1.31E-16	0	0	26	473
GO:0009790 embryo development	36	7.10E-18	29.752	0.034	Biological Process	GO:0009790	embryo development	7.10E-18	1.36E-16	0	0	36	1060
GO:0072359 circulatory system development	38	7.61E-18	31.405	0.032	Biological Process	GO:0072359	circulatory system development	7.61E-18	1.45E-16	0	0	38	1203
GO:1901699 cellular response to nitrogen compound	30	8.05E-18	24.793	0.044	Biological Process	GO:1901699	cellular response to nitrogen compound	8.05E-18	1.52E-16	0	0	30	687
GO:0042033 chemokine biosynthetic process	11	8.06E-18	9.091	0.379	Biological Process	GO:0042033	chemokine biosynthetic process	8.06E-18	1.52E-16	0	0	11	29
GO:0050755 chemokine metabolic process	11	8.06E-18	9.091	0.379	Biological Process	GO:0050755	chemokine metabolic process	8.06E-18	1.52E-16	0	0	11	29
GO:0033138 positive regulation of peptidyl-serine phosphorylation	16	8.12E-18	13.223	0.142	Biological Process	GO:0033138	positive regulation of peptidyl-serine phosphorylation	8.12E-18	1.53E-16	0	0	16	113
GO:0019222 regulation of metabolic process	92	8.77E-18	76.033	0.012	Biological Process	GO:0019222	regulation of metabolic process	8.77E-18	1.64E-16	0	0	92	7530
GO:0007268 chemical synaptic transmission	31	9.04E-18	25.62	0.041	Biological Process	GO:0007268	chemical synaptic transmission	9.04E-18	1.68E-16	0	0	31	748
GO:0098916 anterograde trans-synaptic signaling	31	9.04E-18	25.62	0.041	Biological Process	GO:0098916	anterograde trans-synaptic signaling	9.04E-18	1.68E-16	0	0	31	748
GO:2001057 reactive nitrogen species metabolic process	15	9.95E-18	12.397	0.163	Biological Process	GO:2001057	reactive nitrogen species metabolic process	9.95E-18	1.85E-16	0	0	15	92
GO:0007399 nervous system development	53	1.01E-17	43.802	0.021	Biological Process	GO:0007399	nervous system development	1.01E-17	1.87E-16	0	0	53	2493
GO:0002682 regulation of immune system process	49	1.02E-17	40.496	0.023	Biological Process	GO:0002682	regulation of immune system process	1.02E-17	1.87E-16	0	0	49	2116
GO:0019538 protein metabolic process	86	1.04E-17	71.074	0.013	Biological Process	GO:0019538	protein metabolic process	1.04E-17	1.90E-16	0	0	86	6589
GO:0050900 leukocyte migration	28	1.04E-17	23.14	0.048	Biological Process	GO:0050900	leukocyte migration	1.04E-17	1.90E-16	0	0	28	583
GO:0014015 positive regulation of gliogenesis	15	1.18E-17	12.397	0.161	Biological Process	GO:0014015	positive regulation of gliogenesis	1.18E-17	2.15E-16	0	0	15	93
GO:0050878 regulation of body fluid levels	27	1.19E-17	22.314	0.051	Biological Process	GO:0050878	regulation of body fluid levels	1.19E-17	2.17E-16	0	0	27	534
GO:0060557 positive regulation of vitamin D biosynthetic process	8	1.29E-17	6.612	0.889	Biological Process	GO:0060557	positive regulation of vitamin D biosynthetic process	1.29E-17	2.33E-16	0	0	8	9
GO:0060559 positive regulation of calcidiol 1-monooxygenase activity	8	1.29E-17	6.612	0.889	Biological Process	GO:0060559	positive regulation of calcidiol 1-monooxygenase activity	1.29E-17	2.33E-16	0	0	8	9
GO:0099537 trans-synaptic signaling	31	1.32E-17	25.62	0.041	Biological Process	GO:0099537	trans-synaptic signaling	1.32E-17	2.37E-16	0	0	31	758
GO:0051248 negative regulation of protein metabolic process	39	1.32E-17	32.231	0.03	Biological Process	GO:0051248	negative regulation of protein metabolic process	1.32E-17	2.38E-16	0	0	39	1297
GO:0048708 astrocyte differentiation	15	1.40E-17	12.397	0.16	Biological Process	GO:0048708	astrocyte differentiation	1.40E-17	2.50E-16	0	0	15	94
GO:0031620 regulation of fever generation	9	1.59E-17	7.438	0.643	Biological Process	GO:0031620	regulation of fever generation	1.59E-17	2.83E-16	0	0	9	14
GO:0071316 cellular response to nicotine	9	1.59E-17	7.438	0.643	Biological Process	GO:0071316	cellular response to nicotine	1.59E-17	2.83E-16	0	0	9	14
GO:0006919 activation of cysteine-type endopeptidase activity involved in apoptotic process	15	1.65E-17	12.397	0.158	Biological Process	GO:0006919	activation of cysteine-type endopeptidase activity involved in apoptotic process	1.65E-17	2.92E-16	0	0	15	95
GO:0071345 cellular response to cytokine stimulus	39	1.77E-17	32.231	0.03	Biological Process	GO:0071345	cellular response to cytokine stimulus	1.77E-17	3.11E-16	0	0	39	1308
GO:0042060 wound healing	28	2.00E-17	23.14	0.047	Biological Process	GO:0042060	wound healing	2.00E-17	3.52E-16	0	0	28	598
GO:0048534 hematopoietic or lymphoid organ development	35	2.19E-17	28.926	0.034	Biological Process	GO:0048534	hematopoietic or lymphoid organ development	2.19E-17	3.83E-16	0	0	35	1029
GO:0014013 regulation of gliogenesis	17	2.19E-17	14.05	0.116	Biological Process	GO:0014013	regulation of gliogenesis	2.19E-17	3.83E-16	0	0	17	146
GO:0023061 signal release	26	2.39E-17	21.488	0.052	Biological Process	GO:0023061	signal release	2.39E-17	4.16E-16	0	0	26	498
GO:0060255 regulation of macromolecule metabolic process	88	2.55E-17	72.727	0.013	Biological Process	GO:0060255	regulation of macromolecule metabolic process	2.55E-17	4.42E-16	0	0	88	6987
GO:0019221 cytokine-mediated signaling pathway	34	2.74E-17	28.099	0.035	Biological Process	GO:0019221	cytokine-mediated signaling pathway	2.74E-17	4.75E-16	0	0	34	969
GO:0030730 sequestering of triglyceride	10	2.79E-17	8.264	0.455	Biological Process	GO:0030730	sequestering of triglyceride	2.79E-17	4.81E-16	0	0	10	22
GO:0007155 cell adhesion	42	3.06E-17	34.711	0.027	Biological Process	GO:0007155	cell adhesion	3.06E-17	5.27E-16	0	0	42	1565
GO:0051961 negative regulation of nervous system development	22	3.30E-17	18.182	0.068	Biological Process	GO:0051961	negative regulation of nervous system development	3.30E-17	5.66E-16	0	0	22	322
GO:0006796 phosphate-containing compound metabolic process	63	3.38E-17	52.066	0.017	Biological Process	GO:0006796	phosphate-containing compound metabolic process	3.38E-17	5.77E-16	0	0	63	3631
GO:0022610 biological adhesion	42	3.60E-17	34.711	0.027	Biological Process	GO:0022610	biological adhesion	3.60E-17	6.13E-16	0	0	42	1572
GO:0045944 positive regulation of transcription by RNA polymerase II	38	3.65E-17	31.405	0.03	Biological Process	GO:0045944	positive regulation of transcription by RNA polymerase II	3.65E-17	6.19E-16	0	0	38	1261
GO:0051090 regulation of DNA-binding transcription factor activity	26	3.88E-17	21.488	0.051	Biological Process	GO:0051090	regulation of DNA-binding transcription factor activity	3.88E-17	6.56E-16	0	0	26	508
GO:0002684 positive regulation of immune system process	41	4.09E-17	33.884	0.027	Biological Process	GO:0002684	positive regulation of immune system process	4.09E-17	6.91E-16	0	0	41	1497
GO:0051707 response to other organism	37	4.12E-17	30.579	0.031	Biological Process	GO:0051707	response to other organism	4.12E-17	6.93E-16	0	0	37	1192
GO:0043207 response to external biotic stimulus	37	4.35E-17	30.579	0.031	Biological Process	GO:0043207	response to external biotic stimulus	4.35E-17	7.29E-16	0	0	37	1194
GO:0031649 heat generation	10	4.91E-17	8.264	0.435	Biological Process	GO:0031649	heat generation	4.91E-17	8.20E-16	0	0	10	23
GO:0006793 phosphorus metabolic process	63	4.92E-17	52.066	0.017	Biological Process	GO:0006793	phosphorus metabolic process	4.92E-17	8.20E-16	0	0	63	3658
GO:0009894 regulation of catabolic process	35	5.03E-17	28.926	0.033	Biological Process	GO:0009894	regulation of catabolic process	5.03E-17	8.35E-16	0	0	35	1057
GO:0051130 positive regulation of cellular component organization	39	5.69E-17	32.231	0.029	Biological Process	GO:0051130	positive regulation of cellular component organization	5.69E-17	9.43E-16	0	0	39	1354
GO:0008152 metabolic process	116	6.31E-17	95.868	0.009	Biological Process	GO:0008152	metabolic process	6.31E-17	1.04E-15	0	0	116	12840
GO:0002439 chronic inflammatory response to antigenic stimulus	8	6.42E-17	6.612	0.8	Biological Process	GO:0002439	chronic inflammatory response to antigenic stimulus	6.42E-17	1.05E-15	0	0	8	10
GO:0046136 positive regulation of vitamin metabolic process	8	6.42E-17	6.612	0.8	Biological Process	GO:0046136	positive regulation of vitamin metabolic process	6.42E-17	1.05E-15	0	0	8	10
GO:0032770 positive regulation of monooxygenase activity	11	6.50E-17	9.091	0.324	Biological Process	GO:0032770	positive regulation of monooxygenase activity	6.50E-17	1.06E-15	0	0	11	34
GO:0032103 positive regulation of response to external stimulus	23	6.69E-17	19.008	0.061	Biological Process	GO:0032103	positive regulation of response to external stimulus	6.69E-17	1.09E-15	0	0	23	376
GO:0021782 glial cell development	16	7.21E-17	13.223	0.124	Biological Process	GO:0021782	glial cell development	7.21E-17	1.17E-15	0	0	16	129
GO:0045080 positive regulation of chemokine biosynthetic process	10	8.38E-17	8.264	0.417	Biological Process	GO:0045080	positive regulation of chemokine biosynthetic process	8.38E-17	1.36E-15	0	0	10	24
GO:0071704 organic substance metabolic process	114	8.78E-17	94.215	0.009	Biological Process	GO:0071704	organic substance metabolic process	8.78E-17	1.42E-15	0	0	114	12314
GO:0002520 immune system development	35	1.03E-16	28.926	0.032	Biological Process	GO:0002520	immune system development	1.03E-16	1.67E-15	0	0	35	1082
GO:0010876 lipid localization	24	1.05E-16	19.835	0.056	Biological Process	GO:0010876	lipid localization	1.05E-16	1.69E-15	0	0	24	430
GO:0006809 nitric oxide biosynthetic process	14	1.11E-16	11.57	0.165	Biological Process	GO:0006809	nitric oxide biosynthetic process	1.11E-16	1.77E-15	0	0	14	85
GO:0051402 neuron apoptotic process	20	1.12E-16	16.529	0.077	Biological Process	GO:0051402	neuron apoptotic process	1.12E-16	1.79E-15	0	0	20	261
GO:0001659 temperature homeostasis	18	1.19E-16	14.876	0.094	Biological Process	GO:0001659	temperature homeostasis	1.19E-16	1.90E-15	0	0	18	192
GO:0051222 positive regulation of protein transport	25	1.24E-16	20.661	0.052	Biological Process	GO:0051222	positive regulation of protein transport	1.24E-16	1.98E-15	0	0	25	482
GO:0050768 negative regulation of neurogenesis	21	1.30E-16	17.355	0.07	Biological Process	GO:0050768	negative regulation of neurogenesis	1.30E-16	2.06E-15	0	0	21	302
GO:0046889 positive regulation of lipid biosynthetic process	14	1.32E-16	11.57	0.163	Biological Process	GO:0046889	positive regulation of lipid biosynthetic process	1.32E-16	2.08E-15	0	0	14	86
GO:0052548 regulation of endopeptidase activity	25	1.37E-16	20.661	0.052	Biological Process	GO:0052548	regulation of endopeptidase activity	1.37E-16	2.16E-15	0	0	25	484
GO:0050806 positive regulation of synaptic transmission	18	1.44E-16	14.876	0.093	Biological Process	GO:0050806	positive regulation of synaptic transmission	1.44E-16	2.26E-15	0	0	18	194
GO:0033554 cellular response to stress	49	1.80E-16	40.496	0.022	Biological Process	GO:0033554	cellular response to stress	1.80E-16	2.81E-15	0	0	49	2270
GO:0031652 positive regulation of heat generation	9	1.91E-16	7.438	0.529	Biological Process	GO:0031652	positive regulation of heat generation	1.91E-16	2.97E-15	0	0	9	17
GO:0046886 positive regulation of hormone biosynthetic process	9	1.91E-16	7.438	0.529	Biological Process	GO:0046886	positive regulation of hormone biosynthetic process	1.91E-16	2.97E-15	0	0	9	17
GO:0050708 regulation of protein secretion	26	1.94E-16	21.488	0.048	Biological Process	GO:0050708	regulation of protein secretion	1.94E-16	3.01E-15	0	0	26	543
GO:0009887 animal organ morphogenesis	35	2.09E-16	28.926	0.032	Biological Process	GO:0009887	animal organ morphogenesis	2.09E-16	3.23E-15	0	0	35	1107
GO:0043281 regulation of cysteine-type endopeptidase activity involved in apoptotic process	19	2.18E-16	15.702	0.082	Biological Process	GO:0043281	regulation of cysteine-type endopeptidase activity involved in apoptotic process	2.18E-16	3.36E-15	0	0	19	233
GO:0042802 identical protein binding	46	1.54E-17	37.705	0.025	Molecular Function	GO:0042802	identical protein binding	1.54E-17	3.52E-15	0	0	46	1873
GO:0006508 proteolysis	47	2.29E-16	38.843	0.022	Biological Process	GO:0006508	proteolysis	2.29E-16	3.52E-15	0	0	47	2096
GO:1903827 regulation of cellular protein localization	26	2.32E-16	21.488	0.048	Biological Process	GO:1903827	regulation of cellular protein localization	2.32E-16	3.55E-15	0	0	26	547
GO:0097237 cellular response to toxic substance	20	2.50E-16	16.529	0.074	Biological Process	GO:0097237	cellular response to toxic substance	2.50E-16	3.82E-15	0	0	20	272
GO:0061048 negative regulation of branching involved in lung morphogenesis	7	2.52E-16	5.785	1	Biological Process	GO:0061048	negative regulation of branching involved in lung morphogenesis	2.52E-16	3.85E-15	0	0	7	7
GO:0010721 negative regulation of cell development	22	2.59E-16	18.182	0.062	Biological Process	GO:0010721	negative regulation of cell development	2.59E-16	3.93E-15	0	0	22	355
GO:0048143 astrocyte activation	11	2.68E-16	9.091	0.289	Biological Process	GO:0048143	astrocyte activation	2.68E-16	4.06E-15	0	0	11	38
GO:0006970 response to osmotic stress	14	3.02E-16	11.57	0.154	Biological Process	GO:0006970	response to osmotic stress	3.02E-16	4.57E-15	0	0	14	91
GO:0010883 regulation of lipid storage	12	3.05E-16	9.917	0.226	Biological Process	GO:0010883	regulation of lipid storage	3.05E-16	4.60E-15	0	0	12	53
GO:0048661 positive regulation of smooth muscle cell proliferation	15	3.24E-16	12.397	0.13	Biological Process	GO:0048661	positive regulation of smooth muscle cell proliferation	3.24E-16	4.88E-15	0	0	15	115
GO:0045862 positive regulation of proteolysis	23	3.38E-16	19.008	0.057	Biological Process	GO:0045862	positive regulation of proteolysis	3.38E-16	5.07E-15	0	0	23	405
GO:2000377 regulation of reactive oxygen species metabolic process	18	3.52E-16	14.876	0.088	Biological Process	GO:2000377	regulation of reactive oxygen species metabolic process	3.52E-16	5.27E-15	0	0	18	204
GO:0042368 vitamin D biosynthetic process	9	3.79E-16	7.438	0.5	Biological Process	GO:0042368	vitamin D biosynthetic process	3.79E-16	5.66E-15	0	0	9	18
GO:0006953 acute-phase response	12	3.90E-16	9.917	0.222	Biological Process	GO:0006953	acute-phase response	3.90E-16	5.80E-15	0	0	12	54
GO:0045597 positive regulation of cell differentiation	34	3.96E-16	28.099	0.032	Biological Process	GO:0045597	positive regulation of cell differentiation	3.96E-16	5.87E-15	0	0	34	1059
GO:1901617 organic hydroxy compound biosynthetic process	20	4.38E-16	16.529	0.071	Biological Process	GO:1901617	organic hydroxy compound biosynthetic process	4.38E-16	6.48E-15	0	0	20	280
GO:0052547 regulation of peptidase activity	25	4.63E-16	20.661	0.049	Biological Process	GO:0052547	regulation of peptidase activity	4.63E-16	6.83E-15	0	0	25	510
GO:0001763 morphogenesis of a branching structure	18	4.98E-16	14.876	0.087	Biological Process	GO:0001763	morphogenesis of a branching structure	4.98E-16	7.32E-15	0	0	18	208
GO:0044237 cellular metabolic process	111	5.52E-16	91.736	0.009	Biological Process	GO:0044237	cellular metabolic process	5.52E-16	8.10E-15	0	0	111	11765
GO:0032269 negative regulation of cellular protein metabolic process	36	5.87E-16	29.752	0.03	Biological Process	GO:0032269	negative regulation of cellular protein metabolic process	5.87E-16	8.59E-15	0	0	36	1219
GO:0002020 protease binding	17	5.24E-17	13.934	0.11	Molecular Function	GO:0002020	protease binding	5.24E-17	8.99E-15	0	0	17	154
GO:0003018 vascular process in circulatory system	17	6.50E-16	14.05	0.096	Biological Process	GO:0003018	vascular process in circulatory system	6.50E-16	9.48E-15	0	0	17	178
GO:0005126 cytokine receptor binding	22	7.22E-17	18.033	0.066	Molecular Function	GO:0005126	cytokine receptor binding	7.22E-17	9.90E-15	0	0	22	335
GO:0007623 circadian rhythm	18	6.97E-16	14.876	0.085	Biological Process	GO:0007623	circadian rhythm	6.97E-16	1.01E-14	0	0	18	212
GO:0097527 necroptotic signaling pathway	8	7.00E-16	6.612	0.667	Biological Process	GO:0097527	necroptotic signaling pathway	7.00E-16	1.02E-14	0	0	8	12
GO:0002791 regulation of peptide secretion	26	7.05E-16	21.488	0.045	Biological Process	GO:0002791	regulation of peptide secretion	7.05E-16	1.02E-14	0	0	26	573
GO:0032768 regulation of monooxygenase activity	13	7.12E-16	10.744	0.173	Biological Process	GO:0032768	regulation of monooxygenase activity	7.12E-16	1.03E-14	0	0	13	75
GO:0031650 regulation of heat generation	9	7.17E-16	7.438	0.474	Biological Process	GO:0031650	regulation of heat generation	7.17E-16	1.03E-14	0	0	9	19
GO:0014002 astrocyte development	12	7.92E-16	9.917	0.211	Biological Process	GO:0014002	astrocyte development	7.92E-16	1.14E-14	0	0	12	57
GO:0045785 positive regulation of cell adhesion	24	8.15E-16	19.835	0.051	Biological Process	GO:0045785	positive regulation of cell adhesion	8.15E-16	1.17E-14	0	0	24	471
GO:0019915 lipid storage	13	8.54E-16	10.744	0.171	Biological Process	GO:0019915	lipid storage	8.54E-16	1.22E-14	0	0	13	76
GO:0045321 leukocyte activation	40	8.98E-16	33.058	0.026	Biological Process	GO:0045321	leukocyte activation	8.98E-16	1.28E-14	0	0	40	1552
GO:0051172 negative regulation of nitrogen compound metabolic process	52	9.36E-16	42.975	0.02	Biological Process	GO:0051172	negative regulation of nitrogen compound metabolic process	9.36E-16	1.33E-14	0	0	52	2664
GO:0050994 regulation of lipid catabolic process	12	9.94E-16	9.917	0.207	Biological Process	GO:0050994	regulation of lipid catabolic process	9.94E-16	1.41E-14	0	0	12	58
GO:0048878 chemical homeostasis	36	1.13E-15	29.752	0.029	Biological Process	GO:0048878	chemical homeostasis	1.13E-15	1.60E-14	0	0	36	1245
GO:0001944 vasculature development	30	1.24E-15	24.793	0.036	Biological Process	GO:0001944	vasculature development	1.24E-15	1.74E-14	0	0	30	827
GO:0019430 removal of superoxide radicals	10	1.24E-15	8.264	0.333	Biological Process	GO:0019430	removal of superoxide radicals	1.24E-15	1.75E-14	0	0	10	30
GO:0090322 regulation of superoxide metabolic process	11	1.25E-15	9.091	0.256	Biological Process	GO:0090322	regulation of superoxide metabolic process	1.25E-15	1.75E-14	0	0	11	43
GO:0044281 small molecule metabolic process	48	1.27E-15	39.669	0.021	Biological Process	GO:0044281	small molecule metabolic process	1.27E-15	1.78E-14	0	0	48	2286
GO:0002687 positive regulation of leukocyte migration	16	1.27E-15	13.223	0.104	Biological Process	GO:0002687	positive regulation of leukocyte migration	1.27E-15	1.78E-14	0	0	16	154
GO:0006952 defense response	48	1.36E-15	39.669	0.021	Biological Process	GO:0006952	defense response	1.36E-15	1.89E-14	0	0	48	2290
GO:0032642 regulation of chemokine production	14	1.38E-15	11.57	0.139	Biological Process	GO:0032642	regulation of chemokine production	1.38E-15	1.91E-14	0	0	14	101
GO:0044267 cellular protein metabolic process	77	1.43E-15	63.636	0.013	Biological Process	GO:0044267	cellular protein metabolic process	1.43E-15	1.98E-14	0	0	77	5734
GO:0048514 blood vessel morphogenesis	28	1.50E-15	23.14	0.04	Biological Process	GO:0048514	blood vessel morphogenesis	1.50E-15	2.08E-14	0	0	28	708
GO:0009892 negative regulation of metabolic process	59	1.56E-15	48.76	0.017	Biological Process	GO:0009892	negative regulation of metabolic process	1.56E-15	2.15E-14	0	0	59	3453
GO:0072358 cardiovascular system development	30	1.65E-15	24.793	0.036	Biological Process	GO:0072358	cardiovascular system development	1.65E-15	2.27E-14	0	0	30	836
GO:0098805 whole membrane	44	2.51E-16	36.066	0.023	Cellular Component	GO:0098805	whole membrane	2.51E-16	2.44E-14	0	0	44	1930
GO:0031410 cytoplasmic vesicle	51	2.88E-16	41.803	0.019	Cellular Component	GO:0031410	cytoplasmic vesicle	2.88E-16	2.44E-14	0	0	51	2625
GO:0097708 intracellular vesicle	51	3.02E-16	41.803	0.019	Cellular Component	GO:0097708	intracellular vesicle	3.02E-16	2.44E-14	0	0	51	2628
GO:0002740 negative regulation of cytokine secretion involved in immune response	8	1.81E-15	6.612	0.615	Biological Process	GO:0002740	negative regulation of cytokine secretion involved in immune response	1.81E-15	2.47E-14	0	0	8	13
GO:0060558 regulation of calcidiol 1-monooxygenase activity	8	1.81E-15	6.612	0.615	Biological Process	GO:0060558	regulation of calcidiol 1-monooxygenase activity	1.81E-15	2.47E-14	0	0	8	13
GO:1903409 reactive oxygen species biosynthetic process	15	1.89E-15	12.397	0.116	Biological Process	GO:1903409	reactive oxygen species biosynthetic process	1.89E-15	2.57E-14	0	0	15	129
GO:2001239 regulation of extrinsic apoptotic signaling pathway in absence of ligand	12	1.91E-15	9.917	0.197	Biological Process	GO:2001239	regulation of extrinsic apoptotic signaling pathway in absence of ligand	1.91E-15	2.60E-14	0	0	12	61
GO:0050865 regulation of cell activation	29	1.94E-15	23.967	0.037	Biological Process	GO:0050865	regulation of cell activation	1.94E-15	2.63E-14	0	0	29	777
GO:0046879 hormone secretion	21	2.00E-15	17.355	0.061	Biological Process	GO:0046879	hormone secretion	2.00E-15	2.70E-14	0	0	21	346
GO:0072564 blood microparticle formation	7	2.01E-15	5.785	0.875	Biological Process	GO:0072564	blood microparticle formation	2.01E-15	2.70E-14	0	0	7	8
GO:2000332 regulation of blood microparticle formation	7	2.01E-15	5.785	0.875	Biological Process	GO:2000332	regulation of blood microparticle formation	2.01E-15	2.70E-14	0	0	7	8
GO:2000334 positive regulation of blood microparticle formation	7	2.01E-15	5.785	0.875	Biological Process	GO:2000334	positive regulation of blood microparticle formation	2.01E-15	2.70E-14	0	0	7	8
GO:0051345 positive regulation of hydrolase activity	30	2.06E-15	24.793	0.036	Biological Process	GO:0051345	positive regulation of hydrolase activity	2.06E-15	2.76E-14	0	0	30	843
GO:0044248 cellular catabolic process	50	2.08E-15	41.322	0.02	Biological Process	GO:0044248	cellular catabolic process	2.08E-15	2.78E-14	0	0	50	2512
GO:0042035 regulation of cytokine biosynthetic process	15	2.12E-15	12.397	0.115	Biological Process	GO:0042035	regulation of cytokine biosynthetic process	2.12E-15	2.83E-14	0	0	15	130
GO:0002685 regulation of leukocyte migration	18	2.16E-15	14.876	0.08	Biological Process	GO:0002685	regulation of leukocyte migration	2.16E-15	2.87E-14	0	0	18	226
GO:0042362 fat-soluble vitamin biosynthetic process	9	2.26E-15	7.438	0.429	Biological Process	GO:0042362	fat-soluble vitamin biosynthetic process	2.26E-15	3.00E-14	0	0	9	21
GO:0050999 regulation of nitric-oxide synthase activity	12	2.36E-15	9.917	0.194	Biological Process	GO:0050999	regulation of nitric-oxide synthase activity	2.36E-15	3.11E-14	0	0	12	62
GO:0051353 positive regulation of oxidoreductase activity	12	2.36E-15	9.917	0.194	Biological Process	GO:0051353	positive regulation of oxidoreductase activity	2.36E-15	3.11E-14	0	0	12	62
GO:2000116 regulation of cysteine-type endopeptidase activity	19	2.53E-15	15.702	0.071	Biological Process	GO:2000116	regulation of cysteine-type endopeptidase activity	2.53E-15	3.33E-14	0	0	19	266
GO:0071702 organic substance transport	55	2.64E-15	45.455	0.018	Biological Process	GO:0071702	organic substance transport	2.64E-15	3.46E-14	0	0	55	3048
GO:0071450 cellular response to oxygen radical	10	2.65E-15	8.264	0.312	Biological Process	GO:0071450	cellular response to oxygen radical	2.65E-15	3.46E-14	0	0	10	32
GO:0071451 cellular response to superoxide	10	2.65E-15	8.264	0.312	Biological Process	GO:0071451	cellular response to superoxide	2.65E-15	3.46E-14	0	0	10	32
GO:0061138 morphogenesis of a branching epithelium	17	2.77E-15	14.05	0.088	Biological Process	GO:0061138	morphogenesis of a branching epithelium	2.77E-15	3.62E-14	0	0	17	194
GO:0030097 hemopoiesis	32	2.80E-15	26.446	0.032	Biological Process	GO:0030097	hemopoiesis	2.80E-15	3.64E-14	0	0	32	988
GO:0009306 protein secretion	27	2.87E-15	22.314	0.041	Biological Process	GO:0009306	protein secretion	2.87E-15	3.72E-14	0	0	27	666
GO:0060688 regulation of morphogenesis of a branching structure	12	2.90E-15	9.917	0.19	Biological Process	GO:0060688	regulation of morphogenesis of a branching structure	2.90E-15	3.75E-14	0	0	12	63
GO:0030100 regulation of endocytosis	20	3.10E-15	16.529	0.065	Biological Process	GO:0030100	regulation of endocytosis	3.10E-15	4.01E-14	0	0	20	310
GO:0001568 blood vessel development	29	3.18E-15	23.967	0.037	Biological Process	GO:0001568	blood vessel development	3.18E-15	4.09E-14	0	0	29	792
GO:0098657 import into cell	33	3.51E-15	27.273	0.031	Biological Process	GO:0098657	import into cell	3.51E-15	4.51E-14	0	0	33	1067
GO:0032602 chemokine production	14	3.63E-15	11.57	0.13	Biological Process	GO:0032602	chemokine production	3.63E-15	4.65E-14	0	0	14	108
GO:0009914 hormone transport	21	3.73E-15	17.355	0.059	Biological Process	GO:0009914	hormone transport	3.73E-15	4.77E-14	0	0	21	357
GO:1905477 positive regulation of protein localization to membrane	15	3.77E-15	12.397	0.111	Biological Process	GO:1905477	positive regulation of protein localization to membrane	3.77E-15	4.81E-14	0	0	15	135
GO:0034116 positive regulation of heterotypic cell-cell adhesion	10	3.78E-15	8.264	0.303	Biological Process	GO:0034116	positive regulation of heterotypic cell-cell adhesion	3.78E-15	4.81E-14	0	0	10	33
GO:0032352 positive regulation of hormone metabolic process	9	3.80E-15	7.438	0.409	Biological Process	GO:0032352	positive regulation of hormone metabolic process	3.80E-15	4.83E-14	0	0	9	22
GO:0042108 positive regulation of cytokine biosynthetic process	13	3.95E-15	10.744	0.153	Biological Process	GO:0042108	positive regulation of cytokine biosynthetic process	3.95E-15	5.00E-14	0	0	13	85
GO:0031982 vesicle	65	7.63E-16	53.279	0.015	Cellular Component	GO:0031982	vesicle	7.63E-16	5.27E-14	0	0	65	4321
GO:0000187 activation of MAPK activity	16	4.23E-15	13.223	0.096	Biological Process	GO:0000187	activation of MAPK activity	4.23E-15	5.35E-14	0	0	16	166
GO:0046890 regulation of lipid biosynthetic process	17	4.25E-15	14.05	0.085	Biological Process	GO:0046890	regulation of lipid biosynthetic process	4.25E-15	5.36E-14	0	0	17	199
GO:0030072 peptide hormone secretion	19	4.35E-15	15.702	0.069	Biological Process	GO:0030072	peptide hormone secretion	4.35E-15	5.48E-14	0	0	19	274
GO:0031329 regulation of cellular catabolic process	31	4.43E-15	25.62	0.033	Biological Process	GO:0031329	regulation of cellular catabolic process	4.43E-15	5.57E-14	0	0	31	935
GO:0051091 positive regulation of DNA-binding transcription factor activity	20	4.47E-15	16.529	0.063	Biological Process	GO:0051091	positive regulation of DNA-binding transcription factor activity	4.47E-15	5.60E-14	0	0	20	316
GO:0008015 blood circulation	25	4.90E-15	20.661	0.044	Biological Process	GO:0008015	blood circulation	4.90E-15	6.12E-14	0	0	25	565
GO:0009651 response to salt stress	10	5.32E-15	8.264	0.294	Biological Process	GO:0009651	response to salt stress	5.32E-15	6.64E-14	0	0	10	34
GO:0032870 cellular response to hormone stimulus	28	5.80E-15	23.14	0.037	Biological Process	GO:0032870	cellular response to hormone stimulus	5.80E-15	7.21E-14	0	0	28	747
GO:0042089 cytokine biosynthetic process	15	6.53E-15	12.397	0.107	Biological Process	GO:0042089	cytokine biosynthetic process	6.53E-15	8.10E-14	0	0	15	140
GO:0044238 primary metabolic process	110	6.92E-15	90.909	0.009	Biological Process	GO:0044238	primary metabolic process	6.92E-15	8.57E-14	0	0	110	11834
GO:0003013 circulatory system process	25	7.03E-15	20.661	0.044	Biological Process	GO:0003013	circulatory system process	7.03E-15	8.68E-14	0	0	25	574
GO:0042107 cytokine metabolic process	15	7.27E-15	12.397	0.106	Biological Process	GO:0042107	cytokine metabolic process	7.27E-15	8.96E-14	0	0	15	141
GO:0000303 response to superoxide	10	7.41E-15	8.264	0.286	Biological Process	GO:0000303	response to superoxide	7.41E-15	9.12E-14	0	0	10	35
GO:0043525 positive regulation of neuron apoptotic process	12	7.72E-15	9.917	0.176	Biological Process	GO:0043525	positive regulation of neuron apoptotic process	7.72E-15	9.47E-14	0	0	12	68
GO:0006509 membrane protein ectodomain proteolysis	11	7.82E-15	9.091	0.22	Biological Process	GO:0006509	membrane protein ectodomain proteolysis	7.82E-15	9.53E-14	0	0	11	50
GO:1901099 negative regulation of signal transduction in absence of ligand	11	7.82E-15	9.091	0.22	Biological Process	GO:1901099	negative regulation of signal transduction in absence of ligand	7.82E-15	9.53E-14	0	0	11	50
GO:2001240 negative regulation of extrinsic apoptotic signaling pathway in absence of ligand	11	7.82E-15	9.091	0.22	Biological Process	GO:2001240	negative regulation of extrinsic apoptotic signaling pathway in absence of ligand	7.82E-15	9.53E-14	0	0	11	50
GO:0050727 regulation of inflammatory response	25	8.24E-15	20.661	0.043	Biological Process	GO:0050727	regulation of inflammatory response	8.24E-15	1.00E-13	0	0	25	578
GO:0070848 response to growth factor	28	8.92E-15	23.14	0.037	Biological Process	GO:0070848	response to growth factor	8.92E-15	1.06E-13	0	0	28	760
GO:0060556 regulation of vitamin D biosynthetic process	8	8.96E-15	6.612	0.533	Biological Process	GO:0060556	regulation of vitamin D biosynthetic process	8.96E-15	1.06E-13	0	0	8	15
GO:0071550 death-inducing signaling complex assembly	8	8.96E-15	6.612	0.533	Biological Process	GO:0071550	death-inducing signaling complex assembly	8.96E-15	1.06E-13	0	0	8	15
GO:0090154 positive regulation of sphingolipid biosynthetic process	8	8.96E-15	6.612	0.533	Biological Process	GO:0090154	positive regulation of sphingolipid biosynthetic process	8.96E-15	1.06E-13	0	0	8	15
GO:2000304 positive regulation of ceramide biosynthetic process	8	8.96E-15	6.612	0.533	Biological Process	GO:2000304	positive regulation of ceramide biosynthetic process	8.96E-15	1.06E-13	0	0	8	15
GO:0032603 fractalkine production	7	9.00E-15	5.785	0.778	Biological Process	GO:0032603	fractalkine production	9.00E-15	1.06E-13	0	0	7	9
GO:0032644 regulation of fractalkine production	7	9.00E-15	5.785	0.778	Biological Process	GO:0032644	regulation of fractalkine production	9.00E-15	1.06E-13	0	0	7	9
GO:0032724 positive regulation of fractalkine production	7	9.00E-15	5.785	0.778	Biological Process	GO:0032724	positive regulation of fractalkine production	9.00E-15	1.06E-13	0	0	7	9
GO:0050751 fractalkine biosynthetic process	7	9.00E-15	5.785	0.778	Biological Process	GO:0050751	fractalkine biosynthetic process	9.00E-15	1.06E-13	0	0	7	9
GO:0050752 regulation of fractalkine biosynthetic process	7	9.00E-15	5.785	0.778	Biological Process	GO:0050752	regulation of fractalkine biosynthetic process	9.00E-15	1.06E-13	0	0	7	9
GO:0050754 positive regulation of fractalkine biosynthetic process	7	9.00E-15	5.785	0.778	Biological Process	GO:0050754	positive regulation of fractalkine biosynthetic process	9.00E-15	1.06E-13	0	0	7	9
GO:0050756 fractalkine metabolic process	7	9.00E-15	5.785	0.778	Biological Process	GO:0050756	fractalkine metabolic process	9.00E-15	1.06E-13	0	0	7	9
GO:1901671 positive regulation of superoxide dismutase activity	7	9.00E-15	5.785	0.778	Biological Process	GO:1901671	positive regulation of superoxide dismutase activity	9.00E-15	1.06E-13	0	0	7	9
GO:1904833 positive regulation of removal of superoxide radicals	7	9.00E-15	5.785	0.778	Biological Process	GO:1904833	positive regulation of removal of superoxide radicals	9.00E-15	1.06E-13	0	0	7	9
GO:1904999 positive regulation of leukocyte adhesion to arterial endothelial cell	7	9.00E-15	5.785	0.778	Biological Process	GO:1904999	positive regulation of leukocyte adhesion to arterial endothelial cell	9.00E-15	1.06E-13	0	0	7	9
GO:0010893 positive regulation of steroid biosynthetic process	9	9.90E-15	7.438	0.375	Biological Process	GO:0010893	positive regulation of steroid biosynthetic process	9.90E-15	1.16E-13	0	0	9	24
GO:0045410 positive regulation of interleukin-6 biosynthetic process	9	9.90E-15	7.438	0.375	Biological Process	GO:0045410	positive regulation of interleukin-6 biosynthetic process	9.90E-15	1.16E-13	0	0	9	24
GO:0043280 positive regulation of cysteine-type endopeptidase activity involved in apoptotic process	15	9.99E-15	12.397	0.104	Biological Process	GO:0043280	positive regulation of cysteine-type endopeptidase activity involved in apoptotic process	9.99E-15	1.17E-13	0	0	15	144
GO:0000305 response to oxygen radical	10	1.02E-14	8.264	0.278	Biological Process	GO:0000305	response to oxygen radical	1.02E-14	1.19E-13	0	0	10	36
GO:0043122 regulation of I-kappaB kinase/NF-kappaB signaling	18	1.02E-14	14.876	0.073	Biological Process	GO:0043122	regulation of I-kappaB kinase/NF-kappaB signaling	1.02E-14	1.19E-13	0	0	18	247
GO:0002790 peptide secretion	27	1.03E-14	22.314	0.038	Biological Process	GO:0002790	peptide secretion	1.03E-14	1.20E-13	0	0	27	702
GO:0003006 developmental process involved in reproduction	27	1.11E-14	22.314	0.038	Biological Process	GO:0003006	developmental process involved in reproduction	1.11E-14	1.28E-13	0	0	27	704
GO:0031324 negative regulation of cellular metabolic process	52	1.13E-14	42.975	0.018	Biological Process	GO:0031324	negative regulation of cellular metabolic process	1.13E-14	1.31E-13	0	0	52	2828
GO:0051341 regulation of oxidoreductase activity	14	1.14E-14	11.57	0.12	Biological Process	GO:0051341	regulation of oxidoreductase activity	1.14E-14	1.32E-13	0	0	14	117
GO:0031960 response to corticosteroid	16	1.17E-14	13.223	0.09	Biological Process	GO:0031960	response to corticosteroid	1.17E-14	1.35E-13	0	0	16	177
GO:0046883 regulation of hormone secretion	19	1.39E-14	15.702	0.065	Biological Process	GO:0046883	regulation of hormone secretion	1.39E-14	1.60E-13	0	0	19	292
GO:0002719 negative regulation of cytokine production involved in immune response	10	1.39E-14	8.264	0.27	Biological Process	GO:0002719	negative regulation of cytokine production involved in immune response	1.39E-14	1.60E-13	0	0	10	37
GO:0006066 alcohol metabolic process	21	1.42E-14	17.355	0.055	Biological Process	GO:0006066	alcohol metabolic process	1.42E-14	1.63E-13	0	0	21	382
GO:0051093 negative regulation of developmental process	33	1.47E-14	27.273	0.029	Biological Process	GO:0051093	negative regulation of developmental process	1.47E-14	1.68E-13	0	0	33	1122
GO:0046425 regulation of JAK-STAT cascade	15	1.67E-14	12.397	0.101	Biological Process	GO:0046425	regulation of JAK-STAT cascade	1.67E-14	1.90E-13	0	0	15	149
GO:0030855 epithelial cell differentiation	29	1.68E-14	23.967	0.034	Biological Process	GO:0030855	epithelial cell differentiation	1.68E-14	1.91E-13	0	0	29	845
GO:0080135 regulation of cellular response to stress	29	1.68E-14	23.967	0.034	Biological Process	GO:0080135	regulation of cellular response to stress	1.68E-14	1.91E-13	0	0	29	845
GO:0150078 positive regulation of neuroinflammatory response	10	1.88E-14	8.264	0.263	Biological Process	GO:0150078	positive regulation of neuroinflammatory response	1.88E-14	2.13E-13	0	0	10	38
GO:0007417 central nervous system development	32	1.88E-14	26.446	0.03	Biological Process	GO:0007417	central nervous system development	1.88E-14	2.13E-13	0	0	32	1058
GO:0033002 muscle cell proliferation	18	1.91E-14	14.876	0.07	Biological Process	GO:0033002	muscle cell proliferation	1.91E-14	2.15E-13	0	0	18	256
GO:1901652 response to peptide	24	2.06E-14	19.835	0.044	Biological Process	GO:1901652	response to peptide	2.06E-14	2.32E-13	0	0	24	545
GO:0009612 response to mechanical stimulus	17	2.09E-14	14.05	0.078	Biological Process	GO:0009612	response to mechanical stimulus	2.09E-14	2.35E-13	0	0	17	219
GO:0051098 regulation of binding	21	2.25E-14	17.355	0.054	Biological Process	GO:0051098	regulation of binding	2.25E-14	2.52E-13	0	0	21	391
GO:0032722 positive regulation of chemokine production	12	2.26E-14	9.917	0.162	Biological Process	GO:0032722	positive regulation of chemokine production	2.26E-14	2.52E-13	0	0	12	74
GO:0001819 positive regulation of cytokine production	25	2.32E-14	20.661	0.041	Biological Process	GO:0001819	positive regulation of cytokine production	2.32E-14	2.59E-13	0	0	25	605
GO:0008625 extrinsic apoptotic signaling pathway via death domain receptors	13	2.34E-14	10.744	0.134	Biological Process	GO:0008625	extrinsic apoptotic signaling pathway via death domain receptors	2.34E-14	2.61E-13	0	0	13	97
GO:0048660 regulation of smooth muscle cell proliferation	16	2.36E-14	13.223	0.086	Biological Process	GO:0048660	regulation of smooth muscle cell proliferation	2.36E-14	2.62E-13	0	0	16	185
GO:0055123 digestive system development	15	2.48E-14	12.397	0.098	Biological Process	GO:0055123	digestive system development	2.48E-14	2.75E-13	0	0	15	153
GO:0010605 negative regulation of macromolecule metabolic process	55	2.48E-14	45.455	0.017	Biological Process	GO:0010605	negative regulation of macromolecule metabolic process	2.48E-14	2.75E-13	0	0	55	3209
GO:0031331 positive regulation of cellular catabolic process	21	2.62E-14	17.355	0.053	Biological Process	GO:0031331	positive regulation of cellular catabolic process	2.62E-14	2.89E-13	0	0	21	394
GO:0046427 positive regulation of JAK-STAT cascade	13	2.69E-14	10.744	0.133	Biological Process	GO:0046427	positive regulation of JAK-STAT cascade	2.69E-14	2.96E-13	0	0	13	98
GO:0050810 regulation of steroid biosynthetic process	13	2.69E-14	10.744	0.133	Biological Process	GO:0050810	regulation of steroid biosynthetic process	2.69E-14	2.96E-13	0	0	13	98
GO:1904892 regulation of STAT cascade	15	2.74E-14	12.397	0.097	Biological Process	GO:1904892	regulation of STAT cascade	2.74E-14	3.00E-13	0	0	15	154
GO:0071363 cellular response to growth factor stimulus	27	2.74E-14	22.314	0.037	Biological Process	GO:0071363	cellular response to growth factor stimulus	2.74E-14	3.00E-13	0	0	27	731
GO:0048659 smooth muscle cell proliferation	16	2.80E-14	13.223	0.086	Biological Process	GO:0048659	smooth muscle cell proliferation	2.80E-14	3.06E-13	0	0	16	187
GO:0061757 leukocyte adhesion to arterial endothelial cell	7	2.98E-14	5.785	0.7	Biological Process	GO:0061757	leukocyte adhesion to arterial endothelial cell	2.98E-14	3.25E-13	0	0	7	10
GO:1904997 regulation of leukocyte adhesion to arterial endothelial cell	7	2.98E-14	5.785	0.7	Biological Process	GO:1904997	regulation of leukocyte adhesion to arterial endothelial cell	2.98E-14	3.25E-13	0	0	7	10
GO:0071803 positive regulation of podosome assembly	8	3.35E-14	6.612	0.471	Biological Process	GO:0071803	positive regulation of podosome assembly	3.35E-14	3.64E-13	0	0	8	17
GO:0060252 positive regulation of glial cell proliferation	9	3.49E-14	7.438	0.333	Biological Process	GO:0060252	positive regulation of glial cell proliferation	3.49E-14	3.79E-13	0	0	9	27
GO:0031663 lipopolysaccharide-mediated signaling pathway	12	3.72E-14	9.917	0.156	Biological Process	GO:0031663	lipopolysaccharide-mediated signaling pathway	3.72E-14	4.02E-13	0	0	12	77
GO:0097300 programmed necrotic cell death	11	3.73E-14	9.091	0.193	Biological Process	GO:0097300	programmed necrotic cell death	3.73E-14	4.02E-13	0	0	11	57
GO:0048568 embryonic organ development	22	3.80E-14	18.182	0.049	Biological Process	GO:0048568	embryonic organ development	3.80E-14	4.10E-13	0	0	22	452
GO:1904894 positive regulation of STAT cascade	13	4.02E-14	10.744	0.129	Biological Process	GO:1904894	positive regulation of STAT cascade	4.02E-14	4.33E-13	0	0	13	101
GO:0030073 insulin secretion	17	4.07E-14	14.05	0.075	Biological Process	GO:0030073	insulin secretion	4.07E-14	4.37E-13	0	0	17	228
GO:0019218 regulation of steroid metabolic process	14	4.08E-14	11.57	0.109	Biological Process	GO:0019218	regulation of steroid metabolic process	4.08E-14	4.37E-13	0	0	14	128
GO:0010638 positive regulation of organelle organization	26	4.28E-14	21.488	0.038	Biological Process	GO:0010638	positive regulation of organelle organization	4.28E-14	4.58E-13	0	0	26	682
GO:0002675 positive regulation of acute inflammatory response	10	4.39E-14	8.264	0.244	Biological Process	GO:0002675	positive regulation of acute inflammatory response	4.39E-14	4.69E-13	0	0	10	41
GO:0051384 response to glucocorticoid	15	4.41E-14	12.397	0.094	Biological Process	GO:0051384	response to glucocorticoid	4.41E-14	4.69E-13	0	0	15	159
GO:0090276 regulation of peptide hormone secretion	17	4.70E-14	14.05	0.074	Biological Process	GO:0090276	regulation of peptide hormone secretion	4.70E-14	5.00E-13	0	0	17	230
GO:0007596 blood coagulation	20	5.01E-14	16.529	0.056	Biological Process	GO:0007596	blood coagulation	5.01E-14	5.32E-13	0	0	20	359
GO:0043523 regulation of neuron apoptotic process	17	5.05E-14	14.05	0.074	Biological Process	GO:0043523	regulation of neuron apoptotic process	5.05E-14	5.35E-13	0	0	17	231
GO:0042359 vitamin D metabolic process	9	5.12E-14	7.438	0.321	Biological Process	GO:0042359	vitamin D metabolic process	5.12E-14	5.39E-13	0	0	9	28
GO:0050995 negative regulation of lipid catabolic process	9	5.12E-14	7.438	0.321	Biological Process	GO:0050995	negative regulation of lipid catabolic process	5.12E-14	5.39E-13	0	0	9	28
GO:0051000 positive regulation of nitric-oxide synthase activity	9	5.12E-14	7.438	0.321	Biological Process	GO:0051000	positive regulation of nitric-oxide synthase activity	5.12E-14	5.39E-13	0	0	9	28
GO:0007610 behavior	25	5.20E-14	20.661	0.04	Biological Process	GO:0007610	behavior	5.20E-14	5.46E-13	0	0	25	627
GO:1901888 regulation of cell junction assembly	13	5.22E-14	10.744	0.126	Biological Process	GO:1901888	regulation of cell junction assembly	5.22E-14	5.48E-13	0	0	13	103
GO:0043086 negative regulation of catalytic activity	29	5.30E-14	23.967	0.033	Biological Process	GO:0043086	negative regulation of catalytic activity	5.30E-14	5.55E-13	0	0	29	884
GO:0032813 tumor necrosis factor receptor superfamily binding	12	5.08E-15	9.836	0.182	Molecular Function	GO:0032813	tumor necrosis factor receptor superfamily binding	5.08E-15	5.81E-13	0	0	12	66
GO:0001816 cytokine production	30	5.68E-14	24.793	0.031	Biological Process	GO:0001816	cytokine production	5.68E-14	5.93E-13	0	0	30	956
GO:0048754 branching morphogenesis of an epithelial tube	15	5.82E-14	12.397	0.093	Biological Process	GO:0048754	branching morphogenesis of an epithelial tube	5.82E-14	6.06E-13	0	0	15	162
GO:2001056 positive regulation of cysteine-type endopeptidase activity	15	5.82E-14	12.397	0.093	Biological Process	GO:2001056	positive regulation of cysteine-type endopeptidase activity	5.82E-14	6.06E-13	0	0	15	162
GO:0050796 regulation of insulin secretion	16	5.85E-14	13.223	0.082	Biological Process	GO:0050796	regulation of insulin secretion	5.85E-14	6.07E-13	0	0	16	196
GO:0001101 response to acid chemical	20	5.86E-14	16.529	0.055	Biological Process	GO:0001101	response to acid chemical	5.86E-14	6.07E-13	0	0	20	362
GO:0033036 macromolecule localization	56	5.87E-14	46.281	0.017	Biological Process	GO:0033036	macromolecule localization	5.87E-14	6.07E-13	0	0	56	3387
GO:0007159 leukocyte cell-cell adhesion	21	5.99E-14	17.355	0.051	Biological Process	GO:0007159	leukocyte cell-cell adhesion	5.99E-14	6.16E-13	0	0	21	411
GO:1901550 regulation of endothelial cell development	8	6.00E-14	6.612	0.444	Biological Process	GO:1901550	regulation of endothelial cell development	6.00E-14	6.16E-13	0	0	8	18
GO:1903140 regulation of establishment of endothelial barrier	8	6.00E-14	6.612	0.444	Biological Process	GO:1903140	regulation of establishment of endothelial barrier	6.00E-14	6.16E-13	0	0	8	18
GO:0051966 regulation of synaptic transmission, glutamatergic	12	6.01E-14	9.917	0.15	Biological Process	GO:0051966	regulation of synaptic transmission, glutamatergic	6.01E-14	6.16E-13	0	0	12	80
GO:0007599 hemostasis	20	6.50E-14	16.529	0.055	Biological Process	GO:0007599	hemostasis	6.50E-14	6.66E-13	0	0	20	364
GO:0044255 cellular lipid metabolic process	33	6.58E-14	27.273	0.028	Biological Process	GO:0044255	cellular lipid metabolic process	6.58E-14	6.72E-13	0	0	33	1183
GO:0007568 aging	20	6.84E-14	16.529	0.055	Biological Process	GO:0007568	aging	6.84E-14	6.98E-13	0	0	20	365
GO:0050817 coagulation	20	7.20E-14	16.529	0.055	Biological Process	GO:0050817	coagulation	7.20E-14	7.34E-13	0	0	20	366
GO:1905475 regulation of protein localization to membrane	16	7.42E-14	13.223	0.08	Biological Process	GO:1905475	regulation of protein localization to membrane	7.42E-14	7.53E-13	0	0	16	199
GO:0034114 regulation of heterotypic cell-cell adhesion	10	7.44E-14	8.264	0.233	Biological Process	GO:0034114	regulation of heterotypic cell-cell adhesion	7.44E-14	7.53E-13	0	0	10	43
GO:0051051 negative regulation of transport	24	7.44E-14	19.835	0.042	Biological Process	GO:0051051	negative regulation of transport	7.44E-14	7.53E-13	0	0	24	578
GO:0044283 small molecule biosynthetic process	28	7.69E-14	23.14	0.034	Biological Process	GO:0044283	small molecule biosynthetic process	7.69E-14	7.77E-13	0	0	28	829
GO:0035509 negative regulation of myosin-light-chain-phosphatase activity	7	8.16E-14	5.785	0.636	Biological Process	GO:0035509	negative regulation of myosin-light-chain-phosphatase activity	8.16E-14	8.21E-13	0	0	7	11
GO:1901668 regulation of superoxide dismutase activity	7	8.16E-14	5.785	0.636	Biological Process	GO:1901668	regulation of superoxide dismutase activity	8.16E-14	8.21E-13	0	0	7	11
GO:1903347 negative regulation of bicellular tight junction assembly	7	8.16E-14	5.785	0.636	Biological Process	GO:1903347	negative regulation of bicellular tight junction assembly	8.16E-14	8.21E-13	0	0	7	11
GO:0022414 reproductive process	37	8.23E-14	30.579	0.024	Biological Process	GO:0022414	reproductive process	8.23E-14	8.26E-13	0	0	37	1516
GO:0000003 reproduction	37	8.75E-14	30.579	0.024	Biological Process	GO:0000003	reproduction	8.75E-14	8.76E-13	0	0	37	1519
GO:0006955 immune response	52	9.45E-14	42.975	0.017	Biological Process	GO:0006955	immune response	9.45E-14	9.45E-13	0	0	52	2978
GO:0012505 endomembrane system	68	1.57E-14	55.738	0.014	Cellular Component	GO:0012505	endomembrane system	1.57E-14	9.48E-13	0	0	68	4989
GO:0070482 response to oxygen levels	21	9.57E-14	17.355	0.05	Biological Process	GO:0070482	response to oxygen levels	9.57E-14	9.54E-13	0	0	21	421
GO:0060251 regulation of glial cell proliferation	10	9.57E-14	8.264	0.227	Biological Process	GO:0060251	regulation of glial cell proliferation	9.57E-14	9.54E-13	0	0	10	44
GO:0030656 regulation of vitamin metabolic process	8	1.03E-13	6.612	0.421	Biological Process	GO:0030656	regulation of vitamin metabolic process	1.03E-13	1.02E-12	0	0	8	19
GO:0051641 cellular localization	53	1.03E-13	43.802	0.017	Biological Process	GO:0051641	cellular localization	1.03E-13	1.02E-12	0	0	53	3094
GO:0010720 positive regulation of cell development	24	1.04E-13	19.835	0.041	Biological Process	GO:0010720	positive regulation of cell development	1.04E-13	1.03E-12	0	0	24	587
GO:0009110 vitamin biosynthetic process	9	1.05E-13	7.438	0.3	Biological Process	GO:0009110	vitamin biosynthetic process	1.05E-13	1.04E-12	0	0	9	30
GO:0051043 regulation of membrane protein ectodomain proteolysis	9	1.05E-13	7.438	0.3	Biological Process	GO:0051043	regulation of membrane protein ectodomain proteolysis	1.05E-13	1.04E-12	0	0	9	30
GO:1902930 regulation of alcohol biosynthetic process	12	1.10E-13	9.917	0.143	Biological Process	GO:1902930	regulation of alcohol biosynthetic process	1.10E-13	1.09E-12	0	0	12	84
GO:1903037 regulation of leukocyte cell-cell adhesion	20	1.13E-13	16.529	0.053	Biological Process	GO:1903037	regulation of leukocyte cell-cell adhesion	1.13E-13	1.12E-12	0	0	20	375
GO:0007259 JAK-STAT cascade	15	1.19E-13	12.397	0.088	Biological Process	GO:0007259	JAK-STAT cascade	1.19E-13	1.17E-12	0	0	15	170
GO:0009058 biosynthetic process	82	1.20E-13	67.769	0.012	Biological Process	GO:0009058	biosynthetic process	1.20E-13	1.18E-12	0	0	82	6932
GO:1901575 organic substance catabolic process	46	1.21E-13	38.017	0.019	Biological Process	GO:1901575	organic substance catabolic process	1.21E-13	1.18E-12	0	0	46	2369
GO:0005164 tumor necrosis factor receptor binding	11	1.21E-14	9.016	0.212	Molecular Function	GO:0005164	tumor necrosis factor receptor binding	1.21E-14	1.19E-12	0	0	11	52
GO:0007249 I-kappaB kinase/NF-kappaB signaling	18	1.29E-13	14.876	0.063	Biological Process	GO:0007249	I-kappaB kinase/NF-kappaB signaling	1.29E-13	1.26E-12	0	0	18	286
GO:0022407 regulation of cell-cell adhesion	22	1.46E-13	18.182	0.046	Biological Process	GO:0022407	regulation of cell-cell adhesion	1.46E-13	1.42E-12	0	0	22	483
GO:1902932 positive regulation of alcohol biosynthetic process	9	1.47E-13	7.438	0.29	Biological Process	GO:1902932	positive regulation of alcohol biosynthetic process	1.47E-13	1.43E-12	0	0	9	31
GO:0035296 regulation of tube diameter	14	1.59E-13	11.57	0.099	Biological Process	GO:0035296	regulation of tube diameter	1.59E-13	1.54E-12	0	0	14	141
GO:0097746 regulation of blood vessel diameter	14	1.59E-13	11.57	0.099	Biological Process	GO:0097746	regulation of blood vessel diameter	1.59E-13	1.54E-12	0	0	14	141
GO:0090153 regulation of sphingolipid biosynthetic process	8	1.71E-13	6.612	0.4	Biological Process	GO:0090153	regulation of sphingolipid biosynthetic process	1.71E-13	1.65E-12	0	0	8	20
GO:1905038 regulation of membrane lipid metabolic process	8	1.71E-13	6.612	0.4	Biological Process	GO:1905038	regulation of membrane lipid metabolic process	1.71E-13	1.65E-12	0	0	8	20
GO:2000303 regulation of ceramide biosynthetic process	8	1.71E-13	6.612	0.4	Biological Process	GO:2000303	regulation of ceramide biosynthetic process	1.71E-13	1.65E-12	0	0	8	20
GO:0031098 stress-activated protein kinase signaling cascade	19	1.74E-13	15.702	0.057	Biological Process	GO:0031098	stress-activated protein kinase signaling cascade	1.74E-13	1.68E-12	0	0	19	336
GO:0061046 regulation of branching involved in lung morphogenesis	7	1.95E-13	5.785	0.583	Biological Process	GO:0061046	regulation of branching involved in lung morphogenesis	1.95E-13	1.87E-12	0	0	7	12
GO:0097696 STAT cascade	15	1.99E-13	12.397	0.085	Biological Process	GO:0097696	STAT cascade	1.99E-13	1.91E-12	0	0	15	176
GO:1901889 negative regulation of cell junction assembly	9	2.04E-13	7.438	0.281	Biological Process	GO:1901889	negative regulation of cell junction assembly	2.04E-13	1.95E-12	0	0	9	32
GO:0098609 cell-cell adhesion	29	2.13E-13	23.967	0.031	Biological Process	GO:0098609	cell-cell adhesion	2.13E-13	2.03E-12	0	0	29	934
GO:0001525 angiogenesis	24	2.47E-13	19.835	0.039	Biological Process	GO:0001525	angiogenesis	2.47E-13	2.35E-12	0	0	24	611
GO:0002701 negative regulation of production of molecular mediator of immune response	10	2.47E-13	8.264	0.208	Biological Process	GO:0002701	negative regulation of production of molecular mediator of immune response	2.47E-13	2.35E-12	0	0	10	48
GO:0071801 regulation of podosome assembly	8	2.75E-13	6.612	0.381	Biological Process	GO:0071801	regulation of podosome assembly	2.75E-13	2.61E-12	0	0	8	21
GO:1904996 positive regulation of leukocyte adhesion to vascular endothelial cell	8	2.75E-13	6.612	0.381	Biological Process	GO:1904996	positive regulation of leukocyte adhesion to vascular endothelial cell	2.75E-13	2.61E-12	0	0	8	21
GO:0044419 interspecies interaction between organisms	31	2.79E-13	25.62	0.028	Biological Process	GO:0044419	interspecies interaction between organisms	2.79E-13	2.64E-12	0	0	31	1091
GO:0045940 positive regulation of steroid metabolic process	9	2.79E-13	7.438	0.273	Biological Process	GO:0045940	positive regulation of steroid metabolic process	2.79E-13	2.64E-12	0	0	9	33
GO:0045184 establishment of protein localization	45	2.94E-13	37.19	0.019	Biological Process	GO:0045184	establishment of protein localization	2.94E-13	2.77E-12	0	0	45	2327
GO:0046165 alcohol biosynthetic process	15	3.00E-13	12.397	0.083	Biological Process	GO:0046165	alcohol biosynthetic process	3.00E-13	2.83E-12	0	0	15	181
GO:0048608 reproductive structure development	21	3.06E-13	17.355	0.047	Biological Process	GO:0048608	reproductive structure development	3.06E-13	2.87E-12	0	0	21	447
GO:0010952 positive regulation of peptidase activity	16	3.07E-13	13.223	0.073	Biological Process	GO:0010952	positive regulation of peptidase activity	3.07E-13	2.88E-12	0	0	16	218
GO:0032872 regulation of stress-activated MAPK cascade	17	3.09E-13	14.05	0.066	Biological Process	GO:0032872	regulation of stress-activated MAPK cascade	3.09E-13	2.89E-12	0	0	17	258
GO:0006464 cellular protein modification process	64	3.21E-13	52.893	0.014	Biological Process	GO:0006464	cellular protein modification process	3.21E-13	3.00E-12	0	0	64	4499
GO:0036211 protein modification process	64	3.21E-13	52.893	0.014	Biological Process	GO:0036211	protein modification process	3.21E-13	3.00E-12	0	0	64	4499
GO:0046677 response to antibiotic	19	3.26E-13	15.702	0.055	Biological Process	GO:0046677	response to antibiotic	3.26E-13	3.04E-12	0	0	19	348
GO:0050880 regulation of blood vessel size	14	3.43E-13	11.57	0.094	Biological Process	GO:0050880	regulation of blood vessel size	3.43E-13	3.19E-12	0	0	14	149
GO:0009410 response to xenobiotic stimulus	18	3.46E-13	14.876	0.059	Biological Process	GO:0009410	response to xenobiotic stimulus	3.46E-13	3.21E-12	0	0	18	303
GO:0070265 necrotic cell death	11	3.47E-13	9.091	0.159	Biological Process	GO:0070265	necrotic cell death	3.47E-13	3.22E-12	0	0	11	69
GO:0001817 regulation of cytokine production	28	3.50E-13	23.14	0.032	Biological Process	GO:0001817	regulation of cytokine production	3.50E-13	3.23E-12	0	0	28	882
GO:0070302 regulation of stress-activated protein kinase signaling cascade	17	3.50E-13	14.05	0.065	Biological Process	GO:0070302	regulation of stress-activated protein kinase signaling cascade	3.50E-13	3.23E-12	0	0	17	260
GO:0061458 reproductive system development	21	3.63E-13	17.355	0.047	Biological Process	GO:0061458	reproductive system development	3.63E-13	3.35E-12	0	0	21	451
GO:0035150 regulation of tube size	14	3.76E-13	11.57	0.093	Biological Process	GO:0035150	regulation of tube size	3.76E-13	3.47E-12	0	0	14	150
GO:0046885 regulation of hormone biosynthetic process	9	3.77E-13	7.438	0.265	Biological Process	GO:0046885	regulation of hormone biosynthetic process	3.77E-13	3.47E-12	0	0	9	34
GO:0044403 symbiont process	30	4.01E-13	24.793	0.029	Biological Process	GO:0044403	symbiont process	4.01E-13	3.68E-12	0	0	30	1031
GO:0045596 negative regulation of cell differentiation	27	4.11E-13	22.314	0.033	Biological Process	GO:0045596	negative regulation of cell differentiation	4.11E-13	3.77E-12	0	0	27	819
GO:0060401 cytosolic calcium ion transport	15	4.14E-13	12.397	0.081	Biological Process	GO:0060401	cytosolic calcium ion transport	4.14E-13	3.79E-12	0	0	15	185
GO:0050769 positive regulation of neurogenesis	22	4.17E-13	18.182	0.043	Biological Process	GO:0050769	positive regulation of neurogenesis	4.17E-13	3.81E-12	0	0	22	509
GO:0035507 regulation of myosin-light-chain-phosphatase activity	7	4.20E-13	5.785	0.538	Biological Process	GO:0035507	regulation of myosin-light-chain-phosphatase activity	4.20E-13	3.83E-12	0	0	7	13
GO:0051044 positive regulation of membrane protein ectodomain proteolysis	8	4.30E-13	6.612	0.364	Biological Process	GO:0051044	positive regulation of membrane protein ectodomain proteolysis	4.30E-13	3.91E-12	0	0	8	22
GO:0005125 cytokine activity	18	4.56E-14	14.754	0.067	Molecular Function	GO:0005125	cytokine activity	4.56E-14	3.91E-12	0	0	18	270
GO:0050776 regulation of immune response	36	4.48E-13	29.752	0.024	Biological Process	GO:0050776	regulation of immune response	4.48E-13	4.07E-12	0	0	36	1516
GO:0005615 extracellular space	59	7.62E-14	48.361	0.015	Cellular Component	GO:0005615	extracellular space	7.62E-14	4.10E-12	0	0	59	3958
GO:0051403 stress-activated MAPK cascade	18	4.57E-13	14.876	0.058	Biological Process	GO:0051403	stress-activated MAPK cascade	4.57E-13	4.14E-12	0	0	18	308
GO:0045429 positive regulation of nitric oxide biosynthetic process	10	4.76E-13	8.264	0.196	Biological Process	GO:0045429	positive regulation of nitric oxide biosynthetic process	4.76E-13	4.30E-12	0	0	10	51
GO:1904407 positive regulation of nitric oxide metabolic process	10	4.76E-13	8.264	0.196	Biological Process	GO:1904407	positive regulation of nitric oxide metabolic process	4.76E-13	4.30E-12	0	0	10	51
GO:0045408 regulation of interleukin-6 biosynthetic process	9	5.05E-13	7.438	0.257	Biological Process	GO:0045408	regulation of interleukin-6 biosynthetic process	5.05E-13	4.56E-12	0	0	9	35
GO:1901362 organic cyclic compound biosynthetic process	67	5.09E-13	55.372	0.014	Biological Process	GO:1901362	organic cyclic compound biosynthetic process	5.09E-13	4.59E-12	0	0	67	4934
GO:0007584 response to nutrient	16	5.36E-13	13.223	0.071	Biological Process	GO:0007584	response to nutrient	5.36E-13	4.82E-12	0	0	16	226
GO:0009896 positive regulation of catabolic process	21	5.77E-13	17.355	0.045	Biological Process	GO:0009896	positive regulation of catabolic process	5.77E-13	5.19E-12	0	0	21	462
GO:0042445 hormone metabolic process	17	6.08E-13	14.05	0.063	Biological Process	GO:0042445	hormone metabolic process	6.08E-13	5.44E-12	0	0	17	269
GO:0008104 protein localization	51	6.08E-13	42.149	0.017	Biological Process	GO:0008104	protein localization	6.08E-13	5.44E-12	0	0	51	3008
GO:0051962 positive regulation of nervous system development	23	6.37E-13	19.008	0.04	Biological Process	GO:0051962	positive regulation of nervous system development	6.37E-13	5.69E-12	0	0	23	578
GO:0006807 nitrogen compound metabolic process	105	6.50E-13	86.777	0.009	Biological Process	GO:0006807	nitrogen compound metabolic process	6.50E-13	5.80E-12	0	0	105	11291
GO:2000010 positive regulation of protein localization to cell surface	8	6.55E-13	6.612	0.348	Biological Process	GO:2000010	positive regulation of protein localization to cell surface	6.55E-13	5.84E-12	0	0	8	23
GO:0040007 growth	30	7.05E-13	24.793	0.028	Biological Process	GO:0040007	growth	7.05E-13	6.27E-12	0	0	30	1054
GO:0070266 necroptotic process	10	7.19E-13	8.264	0.189	Biological Process	GO:0070266	necroptotic process	7.19E-13	6.38E-12	0	0	10	53
GO:0034762 regulation of transmembrane transport	23	7.35E-13	19.008	0.04	Biological Process	GO:0034762	regulation of transmembrane transport	7.35E-13	6.51E-12	0	0	23	582
GO:0010468 regulation of gene expression	69	7.45E-13	57.025	0.013	Biological Process	GO:0010468	regulation of gene expression	7.45E-13	6.59E-12	0	0	69	5241
GO:0045428 regulation of nitric oxide biosynthetic process	11	7.75E-13	9.091	0.149	Biological Process	GO:0045428	regulation of nitric oxide biosynthetic process	7.75E-13	6.84E-12	0	0	11	74
GO:0051048 negative regulation of secretion	17	8.18E-13	14.05	0.062	Biological Process	GO:0051048	negative regulation of secretion	8.18E-13	7.22E-12	0	0	17	274
GO:0050801 ion homeostasis	27	8.58E-13	22.314	0.032	Biological Process	GO:0050801	ion homeostasis	8.58E-13	7.55E-12	0	0	27	845
GO:0022409 positive regulation of cell-cell adhesion	18	8.73E-13	14.876	0.056	Biological Process	GO:0022409	positive regulation of cell-cell adhesion	8.73E-13	7.68E-12	0	0	18	320
GO:0016192 vesicle-mediated transport	45	8.80E-13	37.19	0.019	Biological Process	GO:0016192	vesicle-mediated transport	8.80E-13	7.72E-12	0	0	45	2400
GO:0042226 interleukin-6 biosynthetic process	9	8.82E-13	7.438	0.243	Biological Process	GO:0042226	interleukin-6 biosynthetic process	8.82E-13	7.73E-12	0	0	9	37
GO:0050714 positive regulation of protein secretion	18	9.20E-13	14.876	0.056	Biological Process	GO:0050714	positive regulation of protein secretion	9.20E-13	8.05E-12	0	0	18	321
GO:0043412 macromolecule modification	65	9.23E-13	53.719	0.014	Biological Process	GO:0043412	macromolecule modification	9.23E-13	8.06E-12	0	0	65	4729
GO:1903039 positive regulation of leukocyte cell-cell adhesion	17	9.76E-13	14.05	0.061	Biological Process	GO:1903039	positive regulation of leukocyte cell-cell adhesion	9.76E-13	8.51E-12	0	0	17	277
GO:1904018 positive regulation of vasculature development	16	9.77E-13	13.223	0.068	Biological Process	GO:1904018	positive regulation of vasculature development	9.77E-13	8.51E-12	0	0	16	235
GO:0002573 myeloid leukocyte differentiation	16	1.04E-12	13.223	0.068	Biological Process	GO:0002573	myeloid leukocyte differentiation	1.04E-12	9.07E-12	0	0	16	236
GO:0050794 regulation of cellular process	109	1.09E-12	90.083	0.009	Biological Process	GO:0050794	regulation of cellular process	1.09E-12	9.42E-12	0	0	109	12253
GO:0010950 positive regulation of endopeptidase activity	15	1.20E-12	12.397	0.075	Biological Process	GO:0010950	positive regulation of endopeptidase activity	1.20E-12	1.04E-11	0	0	15	199
GO:0002694 regulation of leukocyte activation	25	1.36E-12	20.661	0.034	Biological Process	GO:0002694	regulation of leukocyte activation	1.36E-12	1.17E-11	0	0	25	726
GO:0002739 regulation of cytokine secretion involved in immune response	8	1.43E-12	6.612	0.32	Biological Process	GO:0002739	regulation of cytokine secretion involved in immune response	1.43E-12	1.23E-11	0	0	8	25
GO:0071800 podosome assembly	8	1.43E-12	6.612	0.32	Biological Process	GO:0071800	podosome assembly	1.43E-12	1.23E-11	0	0	8	25
GO:1900409 positive regulation of cellular response to oxidative stress	8	1.43E-12	6.612	0.32	Biological Process	GO:1900409	positive regulation of cellular response to oxidative stress	1.43E-12	1.23E-11	0	0	8	25
GO:0010467 gene expression	76	1.47E-12	62.81	0.012	Biological Process	GO:0010467	gene expression	1.47E-12	1.26E-11	0	0	76	6306
GO:0035249 synaptic transmission, glutamatergic	12	1.53E-12	9.917	0.115	Biological Process	GO:0035249	synaptic transmission, glutamatergic	1.53E-12	1.31E-11	0	0	12	104
GO:2000343 positive regulation of chemokine (C-X-C motif) ligand 2 production	7	1.56E-12	5.785	0.467	Biological Process	GO:2000343	positive regulation of chemokine (C-X-C motif) ligand 2 production	1.56E-12	1.34E-11	0	0	7	15
GO:0040008 regulation of growth	25	1.58E-12	20.661	0.034	Biological Process	GO:0040008	regulation of growth	1.58E-12	1.35E-11	0	0	25	731
GO:0009895 negative regulation of catabolic process	18	1.62E-12	14.876	0.054	Biological Process	GO:0009895	negative regulation of catabolic process	1.62E-12	1.39E-11	0	0	18	332
GO:1901360 organic cyclic compound metabolic process	80	1.65E-12	66.116	0.012	Biological Process	GO:1901360	organic cyclic compound metabolic process	1.65E-12	1.40E-11	0	0	80	6922
GO:0009889 regulation of biosynthetic process	65	1.65E-12	53.719	0.014	Biological Process	GO:0009889	regulation of biosynthetic process	1.65E-12	1.40E-11	0	0	65	4786
GO:0045766 positive regulation of angiogenesis	15	1.85E-12	12.397	0.073	Biological Process	GO:0045766	positive regulation of angiogenesis	1.85E-12	1.57E-11	0	0	15	205
GO:1903076 regulation of protein localization to plasma membrane	12	1.92E-12	9.917	0.113	Biological Process	GO:1903076	regulation of protein localization to plasma membrane	1.92E-12	1.63E-11	0	0	12	106
GO:0031400 negative regulation of protein modification process	24	1.95E-12	19.835	0.036	Biological Process	GO:0031400	negative regulation of protein modification process	1.95E-12	1.65E-11	0	0	24	673
GO:0060402 calcium ion transport into cytosol	14	1.95E-12	11.57	0.083	Biological Process	GO:0060402	calcium ion transport into cytosol	1.95E-12	1.65E-11	0	0	14	169
GO:0001666 response to hypoxia	19	2.04E-12	15.702	0.049	Biological Process	GO:0001666	response to hypoxia	2.04E-12	1.72E-11	0	0	19	386
GO:0006897 endocytosis	28	2.05E-12	23.14	0.03	Biological Process	GO:0006897	endocytosis	2.05E-12	1.73E-11	0	0	28	949
GO:0002544 chronic inflammatory response	8	2.06E-12	6.612	0.308	Biological Process	GO:0002544	chronic inflammatory response	2.06E-12	1.73E-11	0	0	8	26
GO:1901342 regulation of vasculature development	20	2.09E-12	16.529	0.046	Biological Process	GO:1901342	regulation of vasculature development	2.09E-12	1.76E-11	0	0	20	439
GO:0071677 positive regulation of mononuclear cell migration	9	2.43E-12	7.438	0.22	Biological Process	GO:0071677	positive regulation of mononuclear cell migration	2.43E-12	2.04E-11	0	0	9	41
GO:0050673 epithelial cell proliferation	20	2.47E-12	16.529	0.045	Biological Process	GO:0050673	epithelial cell proliferation	2.47E-12	2.07E-11	0	0	20	443
GO:0044459 plasma membrane part	53	4.30E-13	43.443	0.016	Cellular Component	GO:0044459	plasma membrane part	4.30E-13	2.08E-11	0	0	53	3376
GO:0061900 glial cell activation	11	2.49E-12	9.091	0.134	Biological Process	GO:0061900	glial cell activation	2.49E-12	2.09E-11	0	0	11	82
GO:0016032 viral process	28	2.50E-12	23.14	0.029	Biological Process	GO:0016032	viral process	2.50E-12	2.09E-11	0	0	28	957
GO:0014009 glial cell proliferation	10	2.68E-12	8.264	0.167	Biological Process	GO:0014009	glial cell proliferation	2.68E-12	2.24E-11	0	0	10	60
GO:1901033 positive regulation of response to reactive oxygen species	7	2.76E-12	5.785	0.438	Biological Process	GO:1901033	positive regulation of response to reactive oxygen species	2.76E-12	2.30E-11	0	0	7	16
GO:0002793 positive regulation of peptide secretion	18	2.81E-12	14.876	0.052	Biological Process	GO:0002793	positive regulation of peptide secretion	2.81E-12	2.34E-11	0	0	18	343
GO:1902884 positive regulation of response to oxidative stress	8	2.91E-12	6.612	0.296	Biological Process	GO:1902884	positive regulation of response to oxidative stress	2.91E-12	2.42E-11	0	0	8	27
GO:0048565 digestive tract development	13	3.18E-12	10.744	0.092	Biological Process	GO:0048565	digestive tract development	3.18E-12	2.64E-11	0	0	13	141
GO:0043030 regulation of macrophage activation	11	3.27E-12	9.091	0.131	Biological Process	GO:0043030	regulation of macrophage activation	3.27E-12	2.71E-11	0	0	11	84
GO:0036293 response to decreased oxygen levels	19	3.33E-12	15.702	0.048	Biological Process	GO:0036293	response to decreased oxygen levels	3.33E-12	2.76E-11	0	0	19	397
GO:0006694 steroid biosynthetic process	15	3.69E-12	12.397	0.07	Biological Process	GO:0006694	steroid biosynthetic process	3.69E-12	3.04E-11	0	0	15	215
GO:0045936 negative regulation of phosphate metabolic process	23	3.73E-12	19.008	0.037	Biological Process	GO:0045936	negative regulation of phosphate metabolic process	3.73E-12	3.07E-11	0	0	23	630
GO:0002763 positive regulation of myeloid leukocyte differentiation	10	3.79E-12	8.264	0.161	Biological Process	GO:0002763	positive regulation of myeloid leukocyte differentiation	3.79E-12	3.12E-11	0	0	10	62
GO:0010563 negative regulation of phosphorus metabolic process	23	3.85E-12	19.008	0.036	Biological Process	GO:0010563	negative regulation of phosphorus metabolic process	3.85E-12	3.17E-11	0	0	23	631
GO:0002374 cytokine secretion involved in immune response	8	4.05E-12	6.612	0.286	Biological Process	GO:0002374	cytokine secretion involved in immune response	4.05E-12	3.32E-11	0	0	8	28
GO:0044421 extracellular region part	59	8.10E-13	48.361	0.014	Cellular Component	GO:0044421	extracellular region part	8.10E-13	3.56E-11	0	0	59	4172
GO:1903532 positive regulation of secretion by cell	20	4.53E-12	16.529	0.044	Biological Process	GO:1903532	positive regulation of secretion by cell	4.53E-12	3.71E-11	0	0	20	458
GO:0045807 positive regulation of endocytosis	14	4.62E-12	11.57	0.078	Biological Process	GO:0045807	positive regulation of endocytosis	4.62E-12	3.78E-11	0	0	14	180
GO:0045416 positive regulation of interleukin-8 biosynthetic process	7	4.67E-12	5.785	0.412	Biological Process	GO:0045416	positive regulation of interleukin-8 biosynthetic process	4.67E-12	3.81E-11	0	0	7	17
GO:2000121 regulation of removal of superoxide radicals	7	4.67E-12	5.785	0.412	Biological Process	GO:2000121	regulation of removal of superoxide radicals	4.67E-12	3.81E-11	0	0	7	17
GO:2000008 regulation of protein localization to cell surface	9	4.85E-12	7.438	0.205	Biological Process	GO:2000008	regulation of protein localization to cell surface	4.85E-12	3.95E-11	0	0	9	44
GO:0044249 cellular biosynthetic process	78	5.09E-12	64.463	0.012	Biological Process	GO:0044249	cellular biosynthetic process	5.09E-12	4.14E-11	0	0	78	6749
GO:0150077 regulation of neuroinflammatory response	10	5.28E-12	8.264	0.156	Biological Process	GO:0150077	regulation of neuroinflammatory response	5.28E-12	4.29E-11	0	0	10	64
GO:2000810 regulation of bicellular tight junction assembly	8	5.57E-12	6.612	0.276	Biological Process	GO:2000810	regulation of bicellular tight junction assembly	5.57E-12	4.51E-11	0	0	8	29
GO:1903078 positive regulation of protein localization to plasma membrane	10	6.21E-12	8.264	0.154	Biological Process	GO:1903078	positive regulation of protein localization to plasma membrane	6.21E-12	5.02E-11	0	0	10	65
GO:1903428 positive regulation of reactive oxygen species biosynthetic process	10	6.21E-12	8.264	0.154	Biological Process	GO:1903428	positive regulation of reactive oxygen species biosynthetic process	6.21E-12	5.02E-11	0	0	10	65
GO:0002064 epithelial cell development	15	6.66E-12	12.397	0.067	Biological Process	GO:0002064	epithelial cell development	6.66E-12	5.37E-11	0	0	15	224
GO:0009314 response to radiation	20	6.97E-12	16.529	0.043	Biological Process	GO:0009314	response to radiation	6.97E-12	5.61E-11	0	0	20	469
GO:0002367 cytokine production involved in immune response	13	7.05E-12	10.744	0.087	Biological Process	GO:0002367	cytokine production involved in immune response	7.05E-12	5.66E-11	0	0	13	150
GO:0097553 calcium ion transmembrane import into cytosol	13	7.05E-12	10.744	0.087	Biological Process	GO:0097553	calcium ion transmembrane import into cytosol	7.05E-12	5.66E-11	0	0	13	150
GO:1903978 regulation of microglial cell activation	9	7.46E-12	7.438	0.196	Biological Process	GO:1903978	regulation of microglial cell activation	7.46E-12	5.98E-11	0	0	9	46
GO:0000185 activation of MAPKKK activity	7	7.60E-12	5.785	0.389	Biological Process	GO:0000185	activation of MAPKKK activity	7.60E-12	6.09E-11	0	0	7	18
GO:0030324 lung development	14	8.35E-12	11.57	0.074	Biological Process	GO:0030324	lung development	8.35E-12	6.67E-11	0	0	14	188
GO:0007611 learning or memory	16	9.06E-12	13.223	0.059	Biological Process	GO:0007611	learning or memory	9.06E-12	7.23E-11	0	0	16	272
GO:0031226 intrinsic component of plasma membrane	39	1.79E-12	31.967	0.02	Cellular Component	GO:0031226	intrinsic component of plasma membrane	1.79E-12	7.24E-11	0	0	39	1962
GO:1901224 positive regulation of NIK/NF-kappaB signaling	11	9.09E-12	9.091	0.12	Biological Process	GO:1901224	positive regulation of NIK/NF-kappaB signaling	9.09E-12	7.25E-11	0	0	11	92
GO:0032350 regulation of hormone metabolic process	9	9.18E-12	7.438	0.191	Biological Process	GO:0032350	regulation of hormone metabolic process	9.18E-12	7.31E-11	0	0	9	47
GO:0016043 cellular component organization	79	9.51E-12	65.289	0.011	Biological Process	GO:0016043	cellular component organization	9.51E-12	7.56E-11	0	0	79	6977
GO:0045672 positive regulation of osteoclast differentiation	8	1.01E-11	6.612	0.258	Biological Process	GO:0045672	positive regulation of osteoclast differentiation	1.01E-11	8.03E-11	0	0	8	31
GO:0050901 leukocyte tethering or rolling	8	1.01E-11	6.612	0.258	Biological Process	GO:0050901	leukocyte tethering or rolling	1.01E-11	8.03E-11	0	0	8	31
GO:0050729 positive regulation of inflammatory response	14	1.03E-11	11.57	0.073	Biological Process	GO:0050729	positive regulation of inflammatory response	1.03E-11	8.19E-11	0	0	14	191
GO:0005887 integral component of plasma membrane	38	2.30E-12	31.148	0.02	Cellular Component	GO:0005887	integral component of plasma membrane	2.30E-12	8.58E-11	0	0	38	1880
GO:1901576 organic substance biosynthetic process	78	1.11E-11	64.463	0.011	Biological Process	GO:1901576	organic substance biosynthetic process	1.11E-11	8.76E-11	0	0	78	6842
GO:0030323 respiratory tube development	14	1.11E-11	11.57	0.073	Biological Process	GO:0030323	respiratory tube development	1.11E-11	8.76E-11	0	0	14	192
GO:0061614 pri-miRNA transcription by RNA polymerase II	9	1.12E-11	7.438	0.188	Biological Process	GO:0061614	pri-miRNA transcription by RNA polymerase II	1.12E-11	8.86E-11	0	0	9	48
GO:0046686 response to cadmium ion	10	1.16E-11	8.264	0.145	Biological Process	GO:0046686	response to cadmium ion	1.16E-11	9.09E-11	0	0	10	69
GO:0045833 negative regulation of lipid metabolic process	11	1.16E-11	9.091	0.117	Biological Process	GO:0045833	negative regulation of lipid metabolic process	1.16E-11	9.09E-11	0	0	11	94
GO:0032874 positive regulation of stress-activated MAPK cascade	14	1.19E-11	11.57	0.073	Biological Process	GO:0032874	positive regulation of stress-activated MAPK cascade	1.19E-11	9.34E-11	0	0	14	193
GO:0009416 response to light stimulus	17	1.19E-11	14.05	0.052	Biological Process	GO:0009416	response to light stimulus	1.19E-11	9.35E-11	0	0	17	324
GO:2000341 regulation of chemokine (C-X-C motif) ligand 2 production	7	1.20E-11	5.785	0.368	Biological Process	GO:2000341	regulation of chemokine (C-X-C motif) ligand 2 production	1.20E-11	9.37E-11	0	0	7	19
GO:0005901 caveola	11	2.73E-12	9.016	0.126	Cellular Component	GO:0005901	caveola	2.73E-12	9.45E-11	0	0	11	87
GO:0031347 regulation of defense response	29	1.23E-11	23.967	0.026	Biological Process	GO:0031347	regulation of defense response	1.23E-11	9.61E-11	0	0	29	1101
GO:0043123 positive regulation of I-kappaB kinase/NF-kappaB signaling	14	1.28E-11	11.57	0.072	Biological Process	GO:0043123	positive regulation of I-kappaB kinase/NF-kappaB signaling	1.28E-11	9.95E-11	0	0	14	194
GO:0070304 positive regulation of stress-activated protein kinase signaling cascade	14	1.28E-11	11.57	0.072	Biological Process	GO:0070304	positive regulation of stress-activated protein kinase signaling cascade	1.28E-11	9.95E-11	0	0	14	194
GO:0044297 cell body	22	3.13E-12	18.033	0.037	Cellular Component	GO:0044297	cell body	3.13E-12	1.01E-10	0	0	22	594
GO:1900407 regulation of cellular response to oxidative stress	11	1.30E-11	9.091	0.116	Biological Process	GO:1900407	regulation of cellular response to oxidative stress	1.30E-11	1.01E-10	0	0	11	95
GO:0043269 regulation of ion transport	24	1.31E-11	19.835	0.033	Biological Process	GO:0043269	regulation of ion transport	1.31E-11	1.02E-10	0	0	24	737
GO:0044853 plasma membrane raft	12	3.41E-12	9.836	0.103	Cellular Component	GO:0044853	plasma membrane raft	3.41E-12	1.03E-10	0	0	12	117
GO:0019725 cellular homeostasis	28	1.34E-11	23.14	0.027	Biological Process	GO:0019725	cellular homeostasis	1.34E-11	1.04E-10	0	0	28	1027
GO:0050877 nervous system process	35	1.36E-11	28.926	0.022	Biological Process	GO:0050877	nervous system process	1.36E-11	1.05E-10	0	0	35	1613
GO:0006775 fat-soluble vitamin metabolic process	9	1.37E-11	7.438	0.184	Biological Process	GO:0006775	fat-soluble vitamin metabolic process	1.37E-11	1.06E-10	0	0	9	49
GO:0045601 regulation of endothelial cell differentiation	9	1.37E-11	7.438	0.184	Biological Process	GO:0045601	regulation of endothelial cell differentiation	1.37E-11	1.06E-10	0	0	9	49
GO:0061028 establishment of endothelial barrier	9	1.37E-11	7.438	0.184	Biological Process	GO:0061028	establishment of endothelial barrier	1.37E-11	1.06E-10	0	0	9	49
GO:0061756 leukocyte adhesion to vascular endothelial cell	9	1.37E-11	7.438	0.184	Biological Process	GO:0061756	leukocyte adhesion to vascular endothelial cell	1.37E-11	1.06E-10	0	0	9	49
GO:0007204 positive regulation of cytosolic calcium ion concentration	17	1.38E-11	14.05	0.052	Biological Process	GO:0007204	positive regulation of cytosolic calcium ion concentration	1.38E-11	1.06E-10	0	0	17	327
GO:1904375 regulation of protein localization to cell periphery	12	1.40E-11	9.917	0.096	Biological Process	GO:1904375	regulation of protein localization to cell periphery	1.40E-11	1.07E-10	0	0	12	125
GO:0034612 response to tumor necrosis factor	18	1.48E-11	14.876	0.047	Biological Process	GO:0034612	response to tumor necrosis factor	1.48E-11	1.13E-10	0	0	18	379
GO:0051047 positive regulation of secretion	20	1.48E-11	16.529	0.041	Biological Process	GO:0051047	positive regulation of secretion	1.48E-11	1.13E-10	0	0	20	489
GO:0065007 biological regulation	114	1.56E-11	94.215	0.008	Biological Process	GO:0065007	biological regulation	1.56E-11	1.19E-10	0	0	114	13872
GO:0045787 positive regulation of cell cycle	19	1.57E-11	15.702	0.044	Biological Process	GO:0045787	positive regulation of cell cycle	1.57E-11	1.20E-10	0	0	19	434
GO:0150076 neuroinflammatory response	11	1.64E-11	9.091	0.113	Biological Process	GO:0150076	neuroinflammatory response	1.64E-11	1.25E-10	0	0	11	97
GO:0071705 nitrogen compound transport	45	1.65E-11	37.19	0.017	Biological Process	GO:0071705	nitrogen compound transport	1.65E-11	1.26E-10	0	0	45	2611
GO:0019722 calcium-mediated signaling	15	1.68E-11	12.397	0.063	Biological Process	GO:0019722	calcium-mediated signaling	1.68E-11	1.28E-10	0	0	15	239
GO:0050789 regulation of biological process	111	1.69E-11	91.736	0.008	Biological Process	GO:0050789	regulation of biological process	1.69E-11	1.28E-10	0	0	111	13111
GO:0034250 positive regulation of cellular amide metabolic process	13	1.74E-11	10.744	0.081	Biological Process	GO:0034250	positive regulation of cellular amide metabolic process	1.74E-11	1.32E-10	0	0	13	161
GO:1904994 regulation of leukocyte adhesion to vascular endothelial cell	8	1.76E-11	6.612	0.242	Biological Process	GO:1904994	regulation of leukocyte adhesion to vascular endothelial cell	1.76E-11	1.34E-10	0	0	8	33
GO:1904377 positive regulation of protein localization to cell periphery	10	1.80E-11	8.264	0.139	Biological Process	GO:1904377	positive regulation of protein localization to cell periphery	1.80E-11	1.36E-10	0	0	10	72
GO:0045444 fat cell differentiation	15	2.13E-11	12.397	0.062	Biological Process	GO:0045444	fat cell differentiation	2.13E-11	1.61E-10	0	0	15	243
GO:0006935 chemotaxis	23	2.15E-11	19.008	0.033	Biological Process	GO:0006935	chemotaxis	2.15E-11	1.62E-10	0	0	23	687
GO:0010038 response to metal ion	18	2.18E-11	14.876	0.046	Biological Process	GO:0010038	response to metal ion	2.18E-11	1.64E-10	0	0	18	388
GO:0008585 female gonad development	11	2.30E-11	9.091	0.11	Biological Process	GO:0008585	female gonad development	2.30E-11	1.73E-10	0	0	11	100
GO:0032637 interleukin-8 production	11	2.30E-11	9.091	0.11	Biological Process	GO:0032637	interleukin-8 production	2.30E-11	1.73E-10	0	0	11	100
GO:0042330 taxis	23	2.34E-11	19.008	0.033	Biological Process	GO:0042330	taxis	2.34E-11	1.76E-10	0	0	23	690
GO:1903531 negative regulation of secretion by cell	15	2.40E-11	12.397	0.061	Biological Process	GO:1903531	negative regulation of secretion by cell	2.40E-11	1.79E-10	0	0	15	245
GO:0002718 regulation of cytokine production involved in immune response	12	2.44E-11	9.917	0.092	Biological Process	GO:0002718	regulation of cytokine production involved in immune response	2.44E-11	1.83E-10	0	0	12	131
GO:0050777 negative regulation of immune response	14	2.51E-11	11.57	0.069	Biological Process	GO:0050777	negative regulation of immune response	2.51E-11	1.88E-10	0	0	14	204
GO:0072567 chemokine (C-X-C motif) ligand 2 production	7	2.74E-11	5.785	0.333	Biological Process	GO:0072567	chemokine (C-X-C motif) ligand 2 production	2.74E-11	2.04E-10	0	0	7	21
GO:0032715 negative regulation of interleukin-6 production	9	2.90E-11	7.438	0.17	Biological Process	GO:0032715	negative regulation of interleukin-6 production	2.90E-11	2.16E-10	0	0	9	53
GO:0044260 cellular macromolecule metabolic process	91	3.02E-11	75.207	0.01	Biological Process	GO:0044260	cellular macromolecule metabolic process	3.02E-11	2.25E-10	0	0	91	9106
GO:0044057 regulation of system process	22	3.12E-11	18.182	0.035	Biological Process	GO:0044057	regulation of system process	3.12E-11	2.32E-10	0	0	22	634
GO:0010803 regulation of tumor necrosis factor-mediated signaling pathway	10	3.13E-11	8.264	0.132	Biological Process	GO:0010803	regulation of tumor necrosis factor-mediated signaling pathway	3.13E-11	2.32E-10	0	0	10	76
GO:0045765 regulation of angiogenesis	18	3.18E-11	14.876	0.045	Biological Process	GO:0045765	regulation of angiogenesis	3.18E-11	2.35E-10	0	0	18	397
GO:0003707 steroid hormone receptor activity	10	3.10E-12	8.197	0.164	Molecular Function	GO:0003707	steroid hormone receptor activity	3.10E-12	2.36E-10	0	0	10	61
GO:0051209 release of sequestered calcium ion into cytosol	12	3.20E-11	9.917	0.09	Biological Process	GO:0051209	release of sequestered calcium ion into cytosol	3.20E-11	2.36E-10	0	0	12	134
GO:0060562 epithelial tube morphogenesis	17	3.21E-11	14.05	0.049	Biological Process	GO:0060562	epithelial tube morphogenesis	3.21E-11	2.37E-10	0	0	17	345
GO:0043434 response to peptide hormone	19	3.40E-11	15.702	0.042	Biological Process	GO:0043434	response to peptide hormone	3.40E-11	2.51E-10	0	0	19	454
GO:0050709 negative regulation of protein secretion	13	3.72E-11	10.744	0.076	Biological Process	GO:0050709	negative regulation of protein secretion	3.72E-11	2.74E-10	0	0	13	171
GO:0051346 negative regulation of hydrolase activity	20	3.75E-11	16.529	0.039	Biological Process	GO:0051346	negative regulation of hydrolase activity	3.75E-11	2.76E-10	0	0	20	515
GO:0051283 negative regulation of sequestering of calcium ion	12	3.81E-11	9.917	0.088	Biological Process	GO:0051283	negative regulation of sequestering of calcium ion	3.81E-11	2.80E-10	0	0	12	136
GO:0046545 development of primary female sexual characteristics	11	3.95E-11	9.091	0.105	Biological Process	GO:0046545	development of primary female sexual characteristics	3.95E-11	2.89E-10	0	0	11	105
GO:1902882 regulation of response to oxidative stress	11	3.95E-11	9.091	0.105	Biological Process	GO:1902882	regulation of response to oxidative stress	3.95E-11	2.89E-10	0	0	11	105
GO:0071840 cellular component organization or biogenesis	79	4.43E-11	65.289	0.011	Biological Process	GO:0071840	cellular component organization or biogenesis	4.43E-11	3.24E-10	0	0	79	7168
GO:0051282 regulation of sequestering of calcium ion	12	4.53E-11	9.917	0.087	Biological Process	GO:0051282	regulation of sequestering of calcium ion	4.53E-11	3.31E-10	0	0	12	138
GO:0042531 positive regulation of tyrosine phosphorylation of STAT protein	10	4.65E-11	8.264	0.127	Biological Process	GO:0042531	positive regulation of tyrosine phosphorylation of STAT protein	4.65E-11	3.39E-10	0	0	10	79
GO:0002009 morphogenesis of an epithelium	21	4.66E-11	17.355	0.036	Biological Process	GO:0002009	morphogenesis of an epithelium	4.66E-11	3.39E-10	0	0	21	583
GO:0043062 extracellular structure organization	19	4.76E-11	15.702	0.041	Biological Process	GO:0043062	extracellular structure organization	4.76E-11	3.46E-10	0	0	19	463
GO:1901653 cellular response to peptide	18	4.78E-11	14.876	0.044	Biological Process	GO:1901653	cellular response to peptide	4.78E-11	3.47E-10	0	0	18	407
GO:0071356 cellular response to tumor necrosis factor	17	4.80E-11	14.05	0.048	Biological Process	GO:0071356	cellular response to tumor necrosis factor	4.80E-11	3.49E-10	0	0	17	354
GO:0060541 respiratory system development	14	5.08E-11	11.57	0.065	Biological Process	GO:0060541	respiratory system development	5.08E-11	3.68E-10	0	0	14	215
GO:0045598 regulation of fat cell differentiation	12	5.36E-11	9.917	0.086	Biological Process	GO:0045598	regulation of fat cell differentiation	5.36E-11	3.88E-10	0	0	12	140
GO:1903426 regulation of reactive oxygen species biosynthetic process	11	5.38E-11	9.091	0.102	Biological Process	GO:1903426	regulation of reactive oxygen species biosynthetic process	5.38E-11	3.89E-10	0	0	11	108
GO:0006811 ion transport	36	5.54E-11	29.752	0.02	Biological Process	GO:0006811	ion transport	5.54E-11	4.00E-10	0	0	36	1790
GO:0045414 regulation of interleukin-8 biosynthetic process	7	5.71E-11	5.785	0.304	Biological Process	GO:0045414	regulation of interleukin-8 biosynthetic process	5.71E-11	4.10E-10	0	0	7	23
GO:0070886 positive regulation of calcineurin-NFAT signaling cascade	7	5.71E-11	5.785	0.304	Biological Process	GO:0070886	positive regulation of calcineurin-NFAT signaling cascade	5.71E-11	4.10E-10	0	0	7	23
GO:0106058 positive regulation of calcineurin-mediated signaling	7	5.71E-11	5.785	0.304	Biological Process	GO:0106058	positive regulation of calcineurin-mediated signaling	5.71E-11	4.10E-10	0	0	7	23
GO:1905331 negative regulation of morphogenesis of an epithelium	7	5.71E-11	5.785	0.304	Biological Process	GO:1905331	negative regulation of morphogenesis of an epithelium	5.71E-11	4.10E-10	0	0	7	23
GO:0045599 negative regulation of fat cell differentiation	9	5.76E-11	7.438	0.158	Biological Process	GO:0045599	negative regulation of fat cell differentiation	5.76E-11	4.13E-10	0	0	9	57
GO:0071944 cell periphery	74	1.47E-11	60.656	0.011	Cellular Component	GO:0071944	cell periphery	1.47E-11	4.13E-10	0	0	74	6610
GO:0043025 neuronal cell body	20	1.55E-11	16.393	0.039	Cellular Component	GO:0043025	neuronal cell body	1.55E-11	4.13E-10	0	0	20	517
GO:0009986 cell surface	28	1.62E-11	22.951	0.026	Cellular Component	GO:0009986	cell surface	1.62E-11	4.13E-10	0	0	28	1092
GO:0044444 cytoplasmic part	97	1.72E-11	79.508	0.009	Cellular Component	GO:0044444	cytoplasmic part	1.72E-11	4.15E-10	0	0	97	10648
GO:0044089 positive regulation of cellular component biogenesis	21	5.81E-11	17.355	0.036	Biological Process	GO:0044089	positive regulation of cellular component biogenesis	5.81E-11	4.16E-10	0	0	21	590
GO:0051208 sequestering of calcium ion	12	5.83E-11	9.917	0.085	Biological Process	GO:0051208	sequestering of calcium ion	5.83E-11	4.17E-10	0	0	12	141
GO:0031349 positive regulation of defense response	22	5.84E-11	18.182	0.034	Biological Process	GO:0031349	positive regulation of defense response	5.84E-11	4.17E-10	0	0	22	655
GO:0034113 heterotypic cell-cell adhesion	10	6.01E-11	8.264	0.123	Biological Process	GO:0034113	heterotypic cell-cell adhesion	6.01E-11	4.28E-10	0	0	10	81
GO:0005886 plasma membrane	73	1.90E-11	59.836	0.011	Cellular Component	GO:0005886	plasma membrane	1.90E-11	4.38E-10	0	0	73	6488
GO:0002792 negative regulation of peptide secretion	13	6.17E-11	10.744	0.073	Biological Process	GO:0002792	negative regulation of peptide secretion	6.17E-11	4.39E-10	0	0	13	178
GO:0042446 hormone biosynthetic process	11	6.58E-11	9.091	0.1	Biological Process	GO:0042446	hormone biosynthetic process	6.58E-11	4.68E-10	0	0	11	110
GO:0019219 regulation of nucleobase-containing compound metabolic process	60	6.73E-11	49.587	0.013	Biological Process	GO:0019219	regulation of nucleobase-containing compound metabolic process	6.73E-11	4.78E-10	0	0	60	4512
GO:0043536 positive regulation of blood vessel endothelial cell migration	10	6.81E-11	8.264	0.122	Biological Process	GO:0043536	positive regulation of blood vessel endothelial cell migration	6.81E-11	4.83E-10	0	0	10	82
GO:0048729 tissue morphogenesis	23	6.82E-11	19.008	0.032	Biological Process	GO:0048729	tissue morphogenesis	6.82E-11	4.83E-10	0	0	23	728
GO:0019438 aromatic compound biosynthetic process	62	7.06E-11	51.24	0.013	Biological Process	GO:0019438	aromatic compound biosynthetic process	7.06E-11	5.00E-10	0	0	62	4779
GO:0032635 interleukin-6 production	13	7.10E-11	10.744	0.072	Biological Process	GO:0032635	interleukin-6 production	7.10E-11	5.01E-10	0	0	13	180
GO:1903034 regulation of response to wounding	13	7.10E-11	10.744	0.072	Biological Process	GO:1903034	regulation of response to wounding	7.10E-11	5.01E-10	0	0	13	180
GO:0072507 divalent inorganic cation homeostasis	20	7.14E-11	16.529	0.037	Biological Process	GO:0072507	divalent inorganic cation homeostasis	7.14E-11	5.02E-10	0	0	20	534
GO:0090066 regulation of anatomical structure size	20	7.14E-11	16.529	0.037	Biological Process	GO:0090066	regulation of anatomical structure size	7.14E-11	5.02E-10	0	0	20	534
GO:0010623 programmed cell death involved in cell development	6	7.26E-11	4.959	0.462	Biological Process	GO:0010623	programmed cell death involved in cell development	7.26E-11	5.10E-10	0	0	6	13
GO:0006874 cellular calcium ion homeostasis	19	7.37E-11	15.702	0.04	Biological Process	GO:0006874	cellular calcium ion homeostasis	7.37E-11	5.17E-10	0	0	19	475
GO:0038127 ERBB signaling pathway	12	7.47E-11	9.917	0.083	Biological Process	GO:0038127	ERBB signaling pathway	7.47E-11	5.24E-10	0	0	12	144
GO:0033043 regulation of organelle organization	31	7.83E-11	25.62	0.023	Biological Process	GO:0033043	regulation of organelle organization	7.83E-11	5.48E-10	0	0	31	1358
GO:0015031 protein transport	40	7.84E-11	33.058	0.018	Biological Process	GO:0015031	protein transport	7.84E-11	5.48E-10	0	0	40	2206
GO:0042228 interleukin-8 biosynthetic process	7	8.02E-11	5.785	0.292	Biological Process	GO:0042228	interleukin-8 biosynthetic process	8.02E-11	5.60E-10	0	0	7	24
GO:0051480 regulation of cytosolic calcium ion concentration	17	8.08E-11	14.05	0.046	Biological Process	GO:0051480	regulation of cytosolic calcium ion concentration	8.08E-11	5.64E-10	0	0	17	366
GO:0050715 positive regulation of cytokine secretion	13	8.15E-11	10.744	0.071	Biological Process	GO:0050715	positive regulation of cytokine secretion	8.15E-11	5.68E-10	0	0	13	182
GO:0016042 lipid catabolic process	17	8.43E-11	14.05	0.046	Biological Process	GO:0016042	lipid catabolic process	8.43E-11	5.86E-10	0	0	17	367
GO:0036477 somatodendritic compartment	25	2.70E-11	20.492	0.028	Cellular Component	GO:0036477	somatodendritic compartment	2.70E-11	5.95E-10	0	0	25	879
GO:0006875 cellular metal ion homeostasis	21	8.68E-11	17.355	0.035	Biological Process	GO:0006875	cellular metal ion homeostasis	8.68E-11	6.03E-10	0	0	21	603
GO:0009266 response to temperature stimulus	15	8.98E-11	12.397	0.056	Biological Process	GO:0009266	response to temperature stimulus	8.98E-11	6.23E-10	0	0	15	269
GO:0048566 embryonic digestive tract development	8	9.44E-11	6.612	0.2	Biological Process	GO:0048566	embryonic digestive tract development	9.44E-11	6.54E-10	0	0	8	40
GO:0050764 regulation of phagocytosis	11	9.74E-11	9.091	0.096	Biological Process	GO:0050764	regulation of phagocytosis	9.74E-11	6.74E-10	0	0	11	114
GO:0030545 receptor regulator activity	22	1.02E-11	18.033	0.037	Molecular Function	GO:0030545	receptor regulator activity	1.02E-11	6.98E-10	0	0	22	600
GO:0043170 macromolecule metabolic process	98	1.01E-10	80.992	0.009	Biological Process	GO:0043170	macromolecule metabolic process	1.01E-10	6.99E-10	0	0	98	10568
GO:0043393 regulation of protein binding	14	1.05E-10	11.57	0.062	Biological Process	GO:0043393	regulation of protein binding	1.05E-10	7.23E-10	0	0	14	227
GO:0051092 positive regulation of NF-kappaB transcription factor activity	13	1.07E-10	10.744	0.07	Biological Process	GO:0051092	positive regulation of NF-kappaB transcription factor activity	1.07E-10	7.38E-10	0	0	13	186
GO:0050766 positive regulation of phagocytosis	10	1.10E-10	8.264	0.116	Biological Process	GO:0050766	positive regulation of phagocytosis	1.10E-10	7.60E-10	0	0	10	86
GO:0055065 metal ion homeostasis	22	1.13E-10	18.182	0.032	Biological Process	GO:0055065	metal ion homeostasis	1.13E-10	7.77E-10	0	0	22	678
GO:0055074 calcium ion homeostasis	19	1.17E-10	15.702	0.039	Biological Process	GO:0055074	calcium ion homeostasis	1.17E-10	8.00E-10	0	0	19	488
GO:0031326 regulation of cellular biosynthetic process	61	1.22E-10	50.413	0.013	Biological Process	GO:0031326	regulation of cellular biosynthetic process	1.22E-10	8.36E-10	0	0	61	4706
GO:0042176 regulation of protein catabolic process	18	1.26E-10	14.876	0.042	Biological Process	GO:0042176	regulation of protein catabolic process	1.26E-10	8.65E-10	0	0	18	432
GO:0006725 cellular aromatic compound metabolic process	75	1.28E-10	61.983	0.011	Biological Process	GO:0006725	cellular aromatic compound metabolic process	1.28E-10	8.75E-10	0	0	75	6689
GO:0048018 receptor ligand activity	21	1.44E-11	17.213	0.038	Molecular Function	GO:0048018	receptor ligand activity	1.44E-11	9.01E-10	0	0	21	549
GO:0030003 cellular cation homeostasis	22	1.37E-10	18.182	0.032	Biological Process	GO:0030003	cellular cation homeostasis	1.37E-10	9.38E-10	0	0	22	685
GO:0015833 peptide transport	40	1.38E-10	33.058	0.018	Biological Process	GO:0015833	peptide transport	1.38E-10	9.39E-10	0	0	40	2247
GO:0097756 negative regulation of blood vessel diameter	10	1.39E-10	8.264	0.114	Biological Process	GO:0097756	negative regulation of blood vessel diameter	1.39E-10	9.50E-10	0	0	10	88
GO:0002700 regulation of production of molecular mediator of immune response	13	1.40E-10	10.744	0.068	Biological Process	GO:0002700	regulation of production of molecular mediator of immune response	1.40E-10	9.50E-10	0	0	13	190
GO:0014074 response to purine-containing compound	12	1.41E-10	9.917	0.079	Biological Process	GO:0014074	response to purine-containing compound	1.41E-10	9.57E-10	0	0	12	152
GO:0071276 cellular response to cadmium ion	8	1.43E-10	6.612	0.19	Biological Process	GO:0071276	cellular response to cadmium ion	1.43E-10	9.72E-10	0	0	8	42
GO:1902893 regulation of pri-miRNA transcription by RNA polymerase II	8	1.43E-10	6.612	0.19	Biological Process	GO:1902893	regulation of pri-miRNA transcription by RNA polymerase II	1.43E-10	9.72E-10	0	0	8	42
GO:0050808 synapse organization	18	1.47E-10	14.876	0.041	Biological Process	GO:0050808	synapse organization	1.47E-10	9.93E-10	0	0	18	436
GO:0071675 regulation of mononuclear cell migration	9	1.47E-10	7.438	0.143	Biological Process	GO:0071675	regulation of mononuclear cell migration	1.47E-10	9.95E-10	0	0	9	63
GO:0090197 positive regulation of chemokine secretion	7	1.51E-10	5.785	0.269	Biological Process	GO:0090197	positive regulation of chemokine secretion	1.51E-10	1.02E-09	0	0	7	26
GO:0032677 regulation of interleukin-8 production	10	1.56E-10	8.264	0.112	Biological Process	GO:0032677	regulation of interleukin-8 production	1.56E-10	1.05E-09	0	0	10	89
GO:0015850 organic hydroxy compound transport	15	1.57E-10	12.397	0.054	Biological Process	GO:0015850	organic hydroxy compound transport	1.57E-10	1.06E-09	0	0	15	280
GO:0001959 regulation of cytokine-mediated signaling pathway	13	1.59E-10	10.744	0.068	Biological Process	GO:0001959	regulation of cytokine-mediated signaling pathway	1.59E-10	1.07E-09	0	0	13	192
GO:0072604 interleukin-6 secretion	9	1.70E-10	7.438	0.141	Biological Process	GO:0072604	interleukin-6 secretion	1.70E-10	1.14E-09	0	0	9	64
GO:0046660 female sex differentiation	11	1.70E-10	9.091	0.092	Biological Process	GO:0046660	female sex differentiation	1.70E-10	1.14E-09	0	0	11	120
GO:0008144 drug binding	38	2.30E-11	31.148	0.02	Molecular Function	GO:0008144	drug binding	2.30E-11	1.15E-09	0	0	38	1929
GO:0004879 nuclear receptor activity	9	2.35E-11	7.377	0.173	Molecular Function	GO:0004879	nuclear receptor activity	2.35E-11	1.15E-09	0	0	9	52
GO:0098531 transcription factor activity, direct ligand regulated sequence-specific DNA binding	9	2.35E-11	7.377	0.173	Molecular Function	GO:0098531	transcription factor activity, direct ligand regulated sequence-specific DNA binding	2.35E-11	1.15E-09	0	0	9	52
GO:0055080 cation homeostasis	23	1.72E-10	19.008	0.03	Biological Process	GO:0055080	cation homeostasis	1.72E-10	1.15E-09	0	0	23	763
GO:2000027 regulation of animal organ morphogenesis	15	1.74E-10	12.397	0.053	Biological Process	GO:2000027	regulation of animal organ morphogenesis	1.74E-10	1.16E-09	0	0	15	282
GO:0042509 regulation of tyrosine phosphorylation of STAT protein	10	1.75E-10	8.264	0.111	Biological Process	GO:0042509	regulation of tyrosine phosphorylation of STAT protein	1.75E-10	1.17E-09	0	0	10	90
GO:0007254 JNK cascade	14	1.75E-10	11.57	0.059	Biological Process	GO:0007254	JNK cascade	1.75E-10	1.17E-09	0	0	14	236
GO:0038083 peptidyl-tyrosine autophosphorylation	8	1.75E-10	6.612	0.186	Biological Process	GO:0038083	peptidyl-tyrosine autophosphorylation	1.75E-10	1.17E-09	0	0	8	43
GO:0043243 positive regulation of protein complex disassembly	8	1.75E-10	6.612	0.186	Biological Process	GO:0043243	positive regulation of protein complex disassembly	1.75E-10	1.17E-09	0	0	8	43
GO:0110111 negative regulation of animal organ morphogenesis	8	1.75E-10	6.612	0.186	Biological Process	GO:0110111	negative regulation of animal organ morphogenesis	1.75E-10	1.17E-09	0	0	8	43
GO:0001935 endothelial cell proliferation	13	1.81E-10	10.744	0.067	Biological Process	GO:0001935	endothelial cell proliferation	1.81E-10	1.20E-09	0	0	13	194
GO:0007173 epidermal growth factor receptor signaling pathway	11	1.86E-10	9.091	0.091	Biological Process	GO:0007173	epidermal growth factor receptor signaling pathway	1.86E-10	1.24E-09	0	0	11	121
GO:0030316 osteoclast differentiation	11	1.86E-10	9.091	0.091	Biological Process	GO:0030316	osteoclast differentiation	1.86E-10	1.24E-09	0	0	11	121
GO:0032757 positive regulation of interleukin-8 production	9	1.97E-10	7.438	0.138	Biological Process	GO:0032757	positive regulation of interleukin-8 production	1.97E-10	1.30E-09	0	0	9	65
GO:0006873 cellular ion homeostasis	22	2.02E-10	18.182	0.031	Biological Process	GO:0006873	cellular ion homeostasis	2.02E-10	1.33E-09	0	0	22	699
GO:0030879 mammary gland development	12	2.05E-10	9.917	0.076	Biological Process	GO:0030879	mammary gland development	2.05E-10	1.36E-09	0	0	12	157
GO:0070884 regulation of calcineurin-NFAT signaling cascade	8	2.13E-10	6.612	0.182	Biological Process	GO:0070884	regulation of calcineurin-NFAT signaling cascade	2.13E-10	1.40E-09	0	0	8	44
GO:0106056 regulation of calcineurin-mediated signaling	8	2.13E-10	6.612	0.182	Biological Process	GO:0106056	regulation of calcineurin-mediated signaling	2.13E-10	1.40E-09	0	0	8	44
GO:0007260 tyrosine phosphorylation of STAT protein	10	2.18E-10	8.264	0.109	Biological Process	GO:0007260	tyrosine phosphorylation of STAT protein	2.18E-10	1.44E-09	0	0	10	92
GO:0042116 macrophage activation	11	2.23E-10	9.091	0.089	Biological Process	GO:0042116	macrophage activation	2.23E-10	1.46E-09	0	0	11	123
GO:0042886 amide transport	40	2.26E-10	33.058	0.018	Biological Process	GO:0042886	amide transport	2.26E-10	1.48E-09	0	0	40	2284
GO:0043167 ion binding	77	3.27E-11	63.115	0.011	Molecular Function	GO:0043167	ion binding	3.27E-11	1.50E-09	0	0	77	6828
GO:0044706 multi-multicellular organism process	14	2.31E-10	11.57	0.058	Biological Process	GO:0044706	multi-multicellular organism process	2.31E-10	1.51E-09	0	0	14	241
GO:0050807 regulation of synapse organization	14	2.31E-10	11.57	0.058	Biological Process	GO:0050807	regulation of synapse organization	2.31E-10	1.51E-09	0	0	14	241
GO:0002274 myeloid leukocyte activation	23	2.34E-10	19.008	0.03	Biological Process	GO:0002274	myeloid leukocyte activation	2.34E-10	1.53E-09	0	0	23	775
GO:0098771 inorganic ion homeostasis	23	2.40E-10	19.008	0.03	Biological Process	GO:0098771	inorganic ion homeostasis	2.40E-10	1.57E-09	0	0	23	776
GO:0045446 endothelial cell differentiation	11	2.43E-10	9.091	0.089	Biological Process	GO:0045446	endothelial cell differentiation	2.43E-10	1.59E-09	0	0	11	124
GO:0032868 response to insulin	15	2.57E-10	12.397	0.052	Biological Process	GO:0032868	response to insulin	2.57E-10	1.67E-09	0	0	15	290
GO:0072503 cellular divalent inorganic cation homeostasis	19	2.80E-10	15.702	0.037	Biological Process	GO:0072503	cellular divalent inorganic cation homeostasis	2.80E-10	1.82E-09	0	0	19	514
GO:0070405 ammonium ion binding	10	4.51E-11	8.197	0.127	Molecular Function	GO:0070405	ammonium ion binding	4.51E-11	1.88E-09	0	0	10	79
GO:0046983 protein dimerization activity	32	4.66E-11	26.23	0.023	Molecular Function	GO:0046983	protein dimerization activity	4.66E-11	1.88E-09	0	0	32	1420
GO:0055082 cellular chemical homeostasis	24	2.97E-10	19.835	0.028	Biological Process	GO:0055082	cellular chemical homeostasis	2.97E-10	1.93E-09	0	0	24	858
GO:0050663 cytokine secretion	15	3.11E-10	12.397	0.051	Biological Process	GO:0050663	cytokine secretion	3.11E-10	2.02E-09	0	0	15	294
GO:0060759 regulation of response to cytokine stimulus	13	3.37E-10	10.744	0.064	Biological Process	GO:0060759	regulation of response to cytokine stimulus	3.37E-10	2.19E-09	0	0	13	204
GO:0044087 regulation of cellular component biogenesis	26	3.39E-10	21.488	0.026	Biological Process	GO:0044087	regulation of cellular component biogenesis	3.39E-10	2.19E-09	0	0	26	1018
GO:0043535 regulation of blood vessel endothelial cell migration	12	3.41E-10	9.917	0.073	Biological Process	GO:0043535	regulation of blood vessel endothelial cell migration	3.41E-10	2.21E-09	0	0	12	164
GO:0001885 endothelial cell development	9	3.42E-10	7.438	0.13	Biological Process	GO:0001885	endothelial cell development	3.42E-10	2.21E-09	0	0	9	69
GO:0034394 protein localization to cell surface	9	3.42E-10	7.438	0.13	Biological Process	GO:0034394	protein localization to cell surface	3.42E-10	2.21E-09	0	0	9	69
GO:0090196 regulation of chemokine secretion	7	3.53E-10	5.785	0.241	Biological Process	GO:0090196	regulation of chemokine secretion	3.53E-10	2.28E-09	0	0	7	29
GO:0034641 cellular nitrogen compound metabolic process	78	3.57E-10	64.463	0.011	Biological Process	GO:0034641	cellular nitrogen compound metabolic process	3.57E-10	2.30E-09	0	0	78	7284
GO:0034764 positive regulation of transmembrane transport	13	3.58E-10	10.744	0.063	Biological Process	GO:0034764	positive regulation of transmembrane transport	3.58E-10	2.31E-09	0	0	13	205
GO:0030099 myeloid cell differentiation	18	3.73E-10	14.876	0.039	Biological Process	GO:0030099	myeloid cell differentiation	3.73E-10	2.39E-09	0	0	18	462
GO:0032368 regulation of lipid transport	11	3.73E-10	9.091	0.085	Biological Process	GO:0032368	regulation of lipid transport	3.73E-10	2.39E-09	0	0	11	129
GO:0050803 regulation of synapse structure or activity	14	3.74E-10	11.57	0.056	Biological Process	GO:0050803	regulation of synapse structure or activity	3.74E-10	2.40E-09	0	0	14	250
GO:0034654 nucleobase-containing compound biosynthetic process	60	3.80E-10	49.587	0.013	Biological Process	GO:0034654	nucleobase-containing compound biosynthetic process	3.80E-10	2.43E-09	0	0	60	4699
GO:0046328 regulation of JNK cascade	13	3.81E-10	10.744	0.063	Biological Process	GO:0046328	regulation of JNK cascade	3.81E-10	2.43E-09	0	0	13	206
GO:0006909 phagocytosis	18	4.00E-10	14.876	0.039	Biological Process	GO:0006909	phagocytosis	4.00E-10	2.55E-09	0	0	18	464
GO:0030141 secretory granule	25	1.28E-10	20.492	0.026	Cellular Component	GO:0030141	secretory granule	1.28E-10	2.59E-09	0	0	25	946
GO:0005576 extracellular region	62	1.29E-10	50.82	0.012	Cellular Component	GO:0005576	extracellular region	1.29E-10	2.59E-09	0	0	62	5105
GO:0007565 female pregnancy	13	4.29E-10	10.744	0.062	Biological Process	GO:0007565	female pregnancy	4.29E-10	2.74E-09	0	0	13	208
GO:0031334 positive regulation of protein complex assembly	15	4.51E-10	12.397	0.05	Biological Process	GO:0031334	positive regulation of protein complex assembly	4.51E-10	2.87E-09	0	0	15	302
GO:0000122 negative regulation of transcription by RNA polymerase II	24	4.51E-10	19.835	0.027	Biological Process	GO:0000122	negative regulation of transcription by RNA polymerase II	4.51E-10	2.87E-09	0	0	24	876
GO:0003690 double-stranded DNA binding	27	7.61E-11	22.131	0.026	Molecular Function	GO:0003690	double-stranded DNA binding	7.61E-11	2.90E-09	0	0	27	1030
GO:0097305 response to alcohol	14	4.85E-10	11.57	0.055	Biological Process	GO:0097305	response to alcohol	4.85E-10	3.08E-09	0	0	14	255
GO:0001774 microglial cell activation	9	5.05E-10	7.438	0.125	Biological Process	GO:0001774	microglial cell activation	5.05E-10	3.20E-09	0	0	9	72
GO:0002269 leukocyte activation involved in inflammatory response	9	5.05E-10	7.438	0.125	Biological Process	GO:0002269	leukocyte activation involved in inflammatory response	5.05E-10	3.20E-09	0	0	9	72
GO:0034329 cell junction assembly	14	5.11E-10	11.57	0.055	Biological Process	GO:0034329	cell junction assembly	5.11E-10	3.23E-09	0	0	14	256
GO:0030168 platelet activation	12	5.17E-10	9.917	0.071	Biological Process	GO:0030168	platelet activation	5.17E-10	3.27E-09	0	0	12	170
GO:1901031 regulation of response to reactive oxygen species	8	5.29E-10	6.612	0.163	Biological Process	GO:1901031	regulation of response to reactive oxygen species	5.29E-10	3.34E-09	0	0	8	49
GO:0051100 negative regulation of binding	12	5.53E-10	9.917	0.07	Biological Process	GO:0051100	negative regulation of binding	5.53E-10	3.49E-09	0	0	12	171
GO:0090195 chemokine secretion	7	5.88E-10	5.785	0.226	Biological Process	GO:0090195	chemokine secretion	5.88E-10	3.71E-09	0	0	7	31
GO:1902895 positive regulation of pri-miRNA transcription by RNA polymerase II	7	5.88E-10	5.785	0.226	Biological Process	GO:1902895	positive regulation of pri-miRNA transcription by RNA polymerase II	5.88E-10	3.71E-09	0	0	7	31
GO:0032675 regulation of interleukin-6 production	12	5.91E-10	9.917	0.07	Biological Process	GO:0032675	regulation of interleukin-6 production	5.91E-10	3.72E-09	0	0	12	172
GO:0034330 cell junction organization	15	5.92E-10	12.397	0.049	Biological Process	GO:0034330	cell junction organization	5.92E-10	3.72E-09	0	0	15	308
GO:0042110 T cell activation	19	6.00E-10	15.702	0.035	Biological Process	GO:0042110	T cell activation	6.00E-10	3.77E-09	0	0	19	538
GO:0019079 viral genome replication	11	6.09E-10	9.091	0.081	Biological Process	GO:0019079	viral genome replication	6.09E-10	3.81E-09	0	0	11	135
GO:0033209 tumor necrosis factor-mediated signaling pathway	13	6.09E-10	10.744	0.061	Biological Process	GO:0033209	tumor necrosis factor-mediated signaling pathway	6.09E-10	3.81E-09	0	0	13	214
GO:2000778 positive regulation of interleukin-6 secretion	8	6.26E-10	6.612	0.16	Biological Process	GO:2000778	positive regulation of interleukin-6 secretion	6.26E-10	3.92E-09	0	0	8	50
GO:0004713 protein tyrosine kinase activity	12	1.16E-10	9.836	0.08	Molecular Function	GO:0004713	protein tyrosine kinase activity	1.16E-10	4.20E-09	0	0	12	150
GO:0006091 generation of precursor metabolites and energy	19	7.00E-10	15.702	0.035	Biological Process	GO:0006091	generation of precursor metabolites and energy	7.00E-10	4.37E-09	0	0	19	543
GO:0018130 heterocycle biosynthetic process	60	7.12E-10	49.587	0.013	Biological Process	GO:0018130	heterocycle biosynthetic process	7.12E-10	4.44E-09	0	0	60	4770
GO:1901222 regulation of NIK/NF-kappaB signaling	11	7.13E-10	9.091	0.08	Biological Process	GO:1901222	regulation of NIK/NF-kappaB signaling	7.13E-10	4.44E-09	0	0	11	137
GO:0045931 positive regulation of mitotic cell cycle	12	7.22E-10	9.917	0.069	Biological Process	GO:0045931	positive regulation of mitotic cell cycle	7.22E-10	4.49E-09	0	0	12	175
GO:0090068 positive regulation of cell cycle process	15	7.72E-10	12.397	0.048	Biological Process	GO:0090068	positive regulation of cell cycle process	7.72E-10	4.80E-09	0	0	15	314
GO:0008285 negative regulation of cell proliferation	23	7.88E-10	19.008	0.028	Biological Process	GO:0008285	negative regulation of cell proliferation	7.88E-10	4.89E-09	0	0	23	825
GO:0045055 regulated exocytosis	24	7.92E-10	19.835	0.027	Biological Process	GO:0045055	regulated exocytosis	7.92E-10	4.91E-09	0	0	24	901
GO:0050707 regulation of cytokine secretion	14	8.42E-10	11.57	0.053	Biological Process	GO:0050707	regulation of cytokine secretion	8.42E-10	5.22E-09	0	0	14	266
GO:0010629 negative regulation of gene expression	39	8.52E-10	32.231	0.017	Biological Process	GO:0010629	negative regulation of gene expression	8.52E-10	5.27E-09	0	0	39	2282
GO:0043227 membrane-bounded organelle	109	2.84E-10	89.344	0.008	Cellular Component	GO:0043227	membrane-bounded organelle	2.84E-10	5.50E-09	0	0	109	13691
GO:0045069 regulation of viral genome replication	10	8.97E-10	8.264	0.094	Biological Process	GO:0045069	regulation of viral genome replication	8.97E-10	5.55E-09	0	0	10	106
GO:0045639 positive regulation of myeloid cell differentiation	10	9.85E-10	8.264	0.093	Biological Process	GO:0045639	positive regulation of myeloid cell differentiation	9.85E-10	6.08E-09	0	0	10	107
GO:0097458 neuron part	34	3.31E-10	27.869	0.019	Cellular Component	GO:0097458	neuron part	3.31E-10	6.17E-09	0	0	34	1809
GO:0033173 calcineurin-NFAT signaling cascade	8	1.02E-09	6.612	0.151	Biological Process	GO:0033173	calcineurin-NFAT signaling cascade	1.02E-09	6.28E-09	0	0	8	53
GO:0071383 cellular response to steroid hormone stimulus	14	1.02E-09	11.57	0.052	Biological Process	GO:0071383	cellular response to steroid hormone stimulus	1.02E-09	6.30E-09	0	0	14	270
GO:0032386 regulation of intracellular transport	17	1.07E-09	14.05	0.039	Biological Process	GO:0032386	regulation of intracellular transport	1.07E-09	6.58E-09	0	0	17	433
GO:0048589 developmental growth	21	1.08E-09	17.355	0.03	Biological Process	GO:0048589	developmental growth	1.08E-09	6.67E-09	0	0	21	693
GO:1901565 organonitrogen compound catabolic process	30	1.10E-09	24.793	0.021	Biological Process	GO:1901565	organonitrogen compound catabolic process	1.10E-09	6.79E-09	0	0	30	1421
GO:0051224 negative regulation of protein transport	13	1.13E-09	10.744	0.058	Biological Process	GO:0051224	negative regulation of protein transport	1.13E-09	6.90E-09	0	0	13	225
GO:0006766 vitamin metabolic process	11	1.13E-09	9.091	0.077	Biological Process	GO:0006766	vitamin metabolic process	1.13E-09	6.91E-09	0	0	11	143
GO:0042310 vasoconstriction	9	1.18E-09	7.438	0.114	Biological Process	GO:0042310	vasoconstriction	1.18E-09	7.22E-09	0	0	9	79
GO:1990837 sequence-specific double-stranded DNA binding	25	2.11E-10	20.492	0.027	Molecular Function	GO:1990837	sequence-specific double-stranded DNA binding	2.11E-10	7.22E-09	0	0	25	921
GO:1904659 glucose transmembrane transport	10	1.18E-09	8.264	0.092	Biological Process	GO:1904659	glucose transmembrane transport	1.18E-09	7.23E-09	0	0	10	109
GO:0055114 oxidation-reduction process	26	1.19E-09	21.488	0.024	Biological Process	GO:0055114	oxidation-reduction process	1.19E-09	7.28E-09	0	0	26	1080
GO:0051252 regulation of RNA metabolic process	55	1.33E-09	45.455	0.013	Biological Process	GO:0051252	regulation of RNA metabolic process	1.33E-09	8.10E-09	0	0	55	4188
GO:0099056 integral component of presynaptic membrane	9	4.59E-10	7.377	0.12	Cellular Component	GO:0099056	integral component of presynaptic membrane	4.59E-10	8.23E-09	0	0	9	75
GO:0043254 regulation of protein complex assembly	18	1.36E-09	14.876	0.036	Biological Process	GO:0043254	regulation of protein complex assembly	1.36E-09	8.26E-09	0	0	18	501
GO:0005737 cytoplasm	104	5.03E-10	85.246	0.008	Cellular Component	GO:0005737	cytoplasm	5.03E-10	8.70E-09	0	0	104	12630
GO:0098772 molecular function regulator	37	2.69E-10	30.328	0.019	Molecular Function	GO:0098772	molecular function regulator	2.69E-10	8.77E-09	0	0	37	1997
GO:0060441 epithelial tube branching involved in lung morphogenesis	7	1.48E-09	5.785	0.2	Biological Process	GO:0060441	epithelial tube branching involved in lung morphogenesis	1.48E-09	8.98E-09	0	0	7	35
GO:0003158 endothelium development	11	1.51E-09	9.091	0.075	Biological Process	GO:0003158	endothelium development	1.51E-09	9.20E-09	0	0	11	147
GO:1904950 negative regulation of establishment of protein localization	13	1.55E-09	10.744	0.056	Biological Process	GO:1904950	negative regulation of establishment of protein localization	1.55E-09	9.42E-09	0	0	13	231
GO:0097720 calcineurin-mediated signaling	8	1.61E-09	6.612	0.143	Biological Process	GO:0097720	calcineurin-mediated signaling	1.61E-09	9.75E-09	0	0	8	56
GO:0042542 response to hydrogen peroxide	11	1.63E-09	9.091	0.074	Biological Process	GO:0042542	response to hydrogen peroxide	1.63E-09	9.86E-09	0	0	11	148
GO:0002526 acute inflammatory response	14	1.64E-09	11.57	0.05	Biological Process	GO:0002526	acute inflammatory response	1.64E-09	9.89E-09	0	0	14	280
GO:0034248 regulation of cellular amide metabolic process	18	1.64E-09	14.876	0.036	Biological Process	GO:0034248	regulation of cellular amide metabolic process	1.64E-09	9.89E-09	0	0	18	507
GO:0006869 lipid transport	16	1.64E-09	13.223	0.041	Biological Process	GO:0006869	lipid transport	1.64E-09	9.93E-09	0	0	16	387
GO:0008610 lipid biosynthetic process	22	1.68E-09	18.182	0.028	Biological Process	GO:0008610	lipid biosynthetic process	1.68E-09	1.01E-08	0	0	22	783
GO:0043534 blood vessel endothelial cell migration	12	1.74E-09	9.917	0.063	Biological Process	GO:0043534	blood vessel endothelial cell migration	1.74E-09	1.05E-08	0	0	12	189
GO:0043005 neuron projection	29	6.32E-10	23.77	0.021	Cellular Component	GO:0043005	neuron projection	6.32E-10	1.05E-08	0	0	29	1371
GO:0022411 cellular component disassembly	19	1.75E-09	15.702	0.033	Biological Process	GO:0022411	cellular component disassembly	1.75E-09	1.06E-08	0	0	19	574
GO:0099503 secretory vesicle	26	6.64E-10	21.311	0.023	Cellular Component	GO:0099503	secretory vesicle	6.64E-10	1.07E-08	0	0	26	1108
GO:0071868 cellular response to monoamine stimulus	7	1.82E-09	5.785	0.194	Biological Process	GO:0071868	cellular response to monoamine stimulus	1.82E-09	1.09E-08	0	0	7	36
GO:0071870 cellular response to catecholamine stimulus	7	1.82E-09	5.785	0.194	Biological Process	GO:0071870	cellular response to catecholamine stimulus	1.82E-09	1.09E-08	0	0	7	36
GO:0042752 regulation of circadian rhythm	10	1.84E-09	8.264	0.088	Biological Process	GO:0042752	regulation of circadian rhythm	1.84E-09	1.10E-08	0	0	10	114
GO:0050848 regulation of calcium-mediated signaling	10	1.84E-09	8.264	0.088	Biological Process	GO:0050848	regulation of calcium-mediated signaling	1.84E-09	1.10E-08	0	0	10	114
GO:0008645 hexose transmembrane transport	10	2.01E-09	8.264	0.087	Biological Process	GO:0008645	hexose transmembrane transport	2.01E-09	1.20E-08	0	0	10	115
GO:0006355 regulation of transcription, DNA-templated	52	2.04E-09	42.975	0.013	Biological Process	GO:0006355	regulation of transcription, DNA-templated	2.04E-09	1.22E-08	0	0	52	3856
GO:0032102 negative regulation of response to external stimulus	16	2.05E-09	13.223	0.041	Biological Process	GO:0032102	negative regulation of response to external stimulus	2.05E-09	1.22E-08	0	0	16	393
GO:0060425 lung morphogenesis	8	2.15E-09	6.612	0.138	Biological Process	GO:0060425	lung morphogenesis	2.15E-09	1.28E-08	0	0	8	58
GO:0043279 response to alkaloid	10	2.18E-09	8.264	0.086	Biological Process	GO:0043279	response to alkaloid	2.18E-09	1.30E-08	0	0	10	116
GO:0032885 regulation of polysaccharide biosynthetic process	7	2.24E-09	5.785	0.189	Biological Process	GO:0032885	regulation of polysaccharide biosynthetic process	2.24E-09	1.33E-08	0	0	7	37
GO:0000976 transcription regulatory region sequence-specific DNA binding	24	4.27E-10	19.672	0.027	Molecular Function	GO:0000976	transcription regulatory region sequence-specific DNA binding	4.27E-10	1.33E-08	0	0	24	876
GO:0015749 monosaccharide transmembrane transport	10	2.38E-09	8.264	0.085	Biological Process	GO:0015749	monosaccharide transmembrane transport	2.38E-09	1.41E-08	0	0	10	117
GO:0010556 regulation of macromolecule biosynthetic process	57	2.46E-09	47.107	0.013	Biological Process	GO:0010556	regulation of macromolecule biosynthetic process	2.46E-09	1.46E-08	0	0	57	4516
GO:0051649 establishment of localization in cell	39	2.51E-09	32.231	0.016	Biological Process	GO:0051649	establishment of localization in cell	2.51E-09	1.49E-08	0	0	39	2369
GO:1903169 regulation of calcium ion transmembrane transport	11	2.66E-09	9.091	0.071	Biological Process	GO:1903169	regulation of calcium ion transmembrane transport	2.66E-09	1.57E-08	0	0	11	155
GO:0001891 phagocytic cup	7	1.02E-09	5.738	0.2	Cellular Component	GO:0001891	phagocytic cup	1.02E-09	1.59E-08	0	0	7	35
GO:0002252 immune effector process	31	2.69E-09	25.62	0.02	Biological Process	GO:0002252	immune effector process	2.69E-09	1.59E-08	0	0	31	1569
GO:0048609 multicellular organismal reproductive process	23	2.77E-09	19.008	0.026	Biological Process	GO:0048609	multicellular organismal reproductive process	2.77E-09	1.64E-08	0	0	23	881
GO:0071496 cellular response to external stimulus	15	2.80E-09	12.397	0.043	Biological Process	GO:0071496	cellular response to external stimulus	2.80E-09	1.65E-08	0	0	15	345
GO:0034219 carbohydrate transmembrane transport	10	2.81E-09	8.264	0.084	Biological Process	GO:0034219	carbohydrate transmembrane transport	2.81E-09	1.65E-08	0	0	10	119
GO:0098869 cellular oxidant detoxification	10	2.81E-09	8.264	0.084	Biological Process	GO:0098869	cellular oxidant detoxification	2.81E-09	1.65E-08	0	0	10	119
GO:1902532 negative regulation of intracellular signal transduction	19	2.99E-09	15.702	0.032	Biological Process	GO:1902532	negative regulation of intracellular signal transduction	2.99E-09	1.76E-08	0	0	19	593
GO:0000977 RNA polymerase II regulatory region sequence-specific DNA binding	23	6.04E-10	18.852	0.028	Molecular Function	GO:0000977	RNA polymerase II regulatory region sequence-specific DNA binding	6.04E-10	1.80E-08	0	0	23	816
GO:0032755 positive regulation of interleukin-6 production	10	3.30E-09	8.264	0.083	Biological Process	GO:0032755	positive regulation of interleukin-6 production	3.30E-09	1.94E-08	0	0	10	121
GO:0043401 steroid hormone mediated signaling pathway	12	3.32E-09	9.917	0.06	Biological Process	GO:0043401	steroid hormone mediated signaling pathway	3.32E-09	1.95E-08	0	0	12	200
GO:0098889 intrinsic component of presynaptic membrane	9	1.29E-09	7.377	0.107	Cellular Component	GO:0098889	intrinsic component of presynaptic membrane	1.29E-09	1.95E-08	0	0	9	84
GO:0042803 protein homodimerization activity	24	7.01E-10	19.672	0.027	Molecular Function	GO:0042803	protein homodimerization activity	7.01E-10	1.96E-08	0	0	24	898
GO:0001012 RNA polymerase II regulatory region DNA binding	23	7.12E-10	18.852	0.028	Molecular Function	GO:0001012	RNA polymerase II regulatory region DNA binding	7.12E-10	1.96E-08	0	0	23	823
GO:1903506 regulation of nucleic acid-templated transcription	52	3.53E-09	42.975	0.013	Biological Process	GO:1903506	regulation of nucleic acid-templated transcription	3.53E-09	2.07E-08	0	0	52	3915
GO:0002437 inflammatory response to antigenic stimulus	8	3.71E-09	6.612	0.129	Biological Process	GO:0002437	inflammatory response to antigenic stimulus	3.71E-09	2.17E-08	0	0	8	62
GO:0034613 cellular protein localization	35	3.71E-09	28.926	0.018	Biological Process	GO:0034613	cellular protein localization	3.71E-09	2.17E-08	0	0	35	1983
GO:0001667 ameboidal-type cell migration	17	3.79E-09	14.05	0.036	Biological Process	GO:0001667	ameboidal-type cell migration	3.79E-09	2.22E-08	0	0	17	471
GO:0006816 calcium ion transport	17	3.91E-09	14.05	0.036	Biological Process	GO:0006816	calcium ion transport	3.91E-09	2.29E-08	0	0	17	472
GO:0046330 positive regulation of JNK cascade	11	3.97E-09	9.091	0.068	Biological Process	GO:0046330	positive regulation of JNK cascade	3.97E-09	2.32E-08	0	0	11	161
GO:0032504 multicellular organism reproduction	23	3.98E-09	19.008	0.026	Biological Process	GO:0032504	multicellular organism reproduction	3.98E-09	2.32E-08	0	0	23	898
GO:0071867 response to monoamine	7	3.99E-09	5.785	0.175	Biological Process	GO:0071867	response to monoamine	3.99E-09	2.32E-08	0	0	7	40
GO:0071869 response to catecholamine	7	3.99E-09	5.785	0.175	Biological Process	GO:0071869	response to catecholamine	3.99E-09	2.32E-08	0	0	7	40
GO:2001141 regulation of RNA biosynthetic process	52	4.01E-09	42.975	0.013	Biological Process	GO:2001141	regulation of RNA biosynthetic process	4.01E-09	2.33E-08	0	0	52	3929
GO:0006351 transcription, DNA-templated	53	4.04E-09	43.802	0.013	Biological Process	GO:0006351	transcription, DNA-templated	4.04E-09	2.34E-08	0	0	53	4056
GO:0070830 bicellular tight junction assembly	8	4.23E-09	6.612	0.127	Biological Process	GO:0070830	bicellular tight junction assembly	4.23E-09	2.45E-08	0	0	8	63
GO:0044271 cellular nitrogen compound biosynthetic process	64	4.24E-09	52.893	0.012	Biological Process	GO:0044271	cellular nitrogen compound biosynthetic process	4.24E-09	2.46E-08	0	0	64	5534
GO:0048638 regulation of developmental growth	15	4.28E-09	12.397	0.042	Biological Process	GO:0048638	regulation of developmental growth	4.28E-09	2.47E-08	0	0	15	356
GO:0070727 cellular macromolecule localization	35	4.35E-09	28.926	0.018	Biological Process	GO:0070727	cellular macromolecule localization	4.35E-09	2.51E-08	0	0	35	1995
GO:0046649 lymphocyte activation	23	4.42E-09	19.008	0.025	Biological Process	GO:0046649	lymphocyte activation	4.42E-09	2.55E-08	0	0	23	903
GO:0071674 mononuclear cell migration	10	4.54E-09	8.264	0.08	Biological Process	GO:0071674	mononuclear cell migration	4.54E-09	2.62E-08	0	0	10	125
GO:0010631 epithelial cell migration	15	4.61E-09	12.397	0.042	Biological Process	GO:0010631	epithelial cell migration	4.61E-09	2.66E-08	0	0	15	358
GO:1905330 regulation of morphogenesis of an epithelium	12	4.63E-09	9.917	0.058	Biological Process	GO:1905330	regulation of morphogenesis of an epithelium	4.63E-09	2.67E-08	0	0	12	206
GO:0005515 protein binding	112	1.01E-09	91.803	0.008	Molecular Function	GO:0005515	protein binding	1.01E-09	2.67E-08	0	0	112	13916
GO:0120192 tight junction assembly	8	4.81E-09	6.612	0.125	Biological Process	GO:0120192	tight junction assembly	4.81E-09	2.77E-08	0	0	8	64
GO:0030856 regulation of epithelial cell differentiation	11	5.14E-09	9.091	0.067	Biological Process	GO:0030856	regulation of epithelial cell differentiation	5.14E-09	2.95E-08	0	0	11	165
GO:0090132 epithelium migration	15	5.16E-09	12.397	0.042	Biological Process	GO:0090132	epithelium migration	5.16E-09	2.96E-08	0	0	15	361
GO:0010595 positive regulation of endothelial cell migration	10	5.30E-09	8.264	0.079	Biological Process	GO:0010595	positive regulation of endothelial cell migration	5.30E-09	3.04E-08	0	0	10	127
GO:1902105 regulation of leukocyte differentiation	14	5.34E-09	11.57	0.046	Biological Process	GO:1902105	regulation of leukocyte differentiation	5.34E-09	3.05E-08	0	0	14	307
GO:0048016 inositol phosphate-mediated signaling	8	5.46E-09	6.612	0.123	Biological Process	GO:0048016	inositol phosphate-mediated signaling	5.46E-09	3.12E-08	0	0	8	65
GO:1990748 cellular detoxification	10	5.72E-09	8.264	0.078	Biological Process	GO:1990748	cellular detoxification	5.72E-09	3.27E-08	0	0	10	128
GO:0097659 nucleic acid-templated transcription	53	5.98E-09	43.802	0.013	Biological Process	GO:0097659	nucleic acid-templated transcription	5.98E-09	3.41E-08	0	0	53	4100
GO:0035304 regulation of protein dephosphorylation	11	6.21E-09	9.091	0.065	Biological Process	GO:0035304	regulation of protein dephosphorylation	6.21E-09	3.54E-08	0	0	11	168
GO:0044703 multi-organism reproductive process	25	6.26E-09	20.661	0.023	Biological Process	GO:0044703	multi-organism reproductive process	6.26E-09	3.57E-08	0	0	25	1084
GO:0090130 tissue migration	15	6.45E-09	12.397	0.041	Biological Process	GO:0090130	tissue migration	6.45E-09	3.67E-08	0	0	15	367
GO:2000112 regulation of cellular macromolecule biosynthetic process	55	6.60E-09	45.455	0.013	Biological Process	GO:2000112	regulation of cellular macromolecule biosynthetic process	6.60E-09	3.75E-08	0	0	55	4369
GO:1902107 positive regulation of leukocyte differentiation	11	6.61E-09	9.091	0.065	Biological Process	GO:1902107	positive regulation of leukocyte differentiation	6.61E-09	3.75E-08	0	0	11	169
GO:0032881 regulation of polysaccharide metabolic process	7	6.79E-09	5.785	0.163	Biological Process	GO:0032881	regulation of polysaccharide metabolic process	6.79E-09	3.85E-08	0	0	7	43
GO:0120193 tight junction organization	8	6.98E-09	6.612	0.119	Biological Process	GO:0120193	tight junction organization	6.98E-09	3.96E-08	0	0	8	67
GO:0002673 regulation of acute inflammatory response	12	7.11E-09	9.917	0.056	Biological Process	GO:0002673	regulation of acute inflammatory response	7.11E-09	4.03E-08	0	0	12	214
GO:0032774 RNA biosynthetic process	53	7.39E-09	43.802	0.013	Biological Process	GO:0032774	RNA biosynthetic process	7.39E-09	4.18E-08	0	0	53	4124
GO:0010634 positive regulation of epithelial cell migration	11	7.47E-09	9.091	0.064	Biological Process	GO:0010634	positive regulation of epithelial cell migration	7.47E-09	4.22E-08	0	0	11	171
GO:0035270 endocrine system development	10	7.71E-09	8.264	0.076	Biological Process	GO:0035270	endocrine system development	7.71E-09	4.35E-08	0	0	10	132
GO:0045071 negative regulation of viral genome replication	8	7.88E-09	6.612	0.118	Biological Process	GO:0045071	negative regulation of viral genome replication	7.88E-09	4.44E-08	0	0	8	68
GO:0034765 regulation of ion transmembrane transport	17	8.18E-09	14.05	0.034	Biological Process	GO:0034765	regulation of ion transmembrane transport	8.18E-09	4.60E-08	0	0	17	496
GO:0046483 heterocycle metabolic process	71	8.41E-09	58.678	0.011	Biological Process	GO:0046483	heterocycle metabolic process	8.41E-09	4.73E-08	0	0	71	6645
GO:0046513 ceramide biosynthetic process	8	8.86E-09	6.612	0.116	Biological Process	GO:0046513	ceramide biosynthetic process	8.86E-09	4.98E-08	0	0	8	69
GO:0060191 regulation of lipase activity	9	8.96E-09	7.438	0.091	Biological Process	GO:0060191	regulation of lipase activity	8.96E-09	5.03E-08	0	0	9	99
GO:1900274 regulation of phospholipase C activity	7	9.47E-09	5.785	0.156	Biological Process	GO:1900274	regulation of phospholipase C activity	9.47E-09	5.31E-08	0	0	7	45
GO:0006887 exocytosis	24	9.57E-09	19.835	0.023	Biological Process	GO:0006887	exocytosis	9.57E-09	5.36E-08	0	0	24	1023
GO:0002761 regulation of myeloid leukocyte differentiation	10	9.58E-09	8.264	0.074	Biological Process	GO:0002761	regulation of myeloid leukocyte differentiation	9.58E-09	5.36E-08	0	0	10	135
GO:0071229 cellular response to acid chemical	12	9.70E-09	9.917	0.055	Biological Process	GO:0071229	cellular response to acid chemical	9.70E-09	5.42E-08	0	0	12	220
GO:0045471 response to ethanol	10	1.03E-08	8.264	0.074	Biological Process	GO:0045471	response to ethanol	1.03E-08	5.74E-08	0	0	10	136
GO:0048872 homeostasis of number of cells	13	1.06E-08	10.744	0.048	Biological Process	GO:0048872	homeostasis of number of cells	1.06E-08	5.93E-08	0	0	13	271
GO:0050710 negative regulation of cytokine secretion	9	1.07E-08	7.438	0.089	Biological Process	GO:0050710	negative regulation of cytokine secretion	1.07E-08	5.96E-08	0	0	9	101
GO:0019058 viral life cycle	15	1.10E-08	12.397	0.039	Biological Process	GO:0019058	viral life cycle	1.10E-08	6.14E-08	0	0	15	382
GO:0046683 response to organophosphorus	10	1.10E-08	8.264	0.073	Biological Process	GO:0046683	response to organophosphorus	1.10E-08	6.14E-08	0	0	10	137
GO:0038061 NIK/NF-kappaB signaling	12	1.13E-08	9.917	0.054	Biological Process	GO:0038061	NIK/NF-kappaB signaling	1.13E-08	6.27E-08	0	0	12	223
GO:0001936 regulation of endothelial cell proliferation	11	1.14E-08	9.091	0.062	Biological Process	GO:0001936	regulation of endothelial cell proliferation	1.14E-08	6.30E-08	0	0	11	178
GO:0006367 transcription initiation from RNA polymerase II promoter	12	1.19E-08	9.917	0.054	Biological Process	GO:0006367	transcription initiation from RNA polymerase II promoter	1.19E-08	6.58E-08	0	0	12	224
GO:0006357 regulation of transcription by RNA polymerase II	42	1.21E-08	34.711	0.015	Biological Process	GO:0006357	regulation of transcription by RNA polymerase II	1.21E-08	6.67E-08	0	0	42	2841
GO:0045892 negative regulation of transcription, DNA-templated	27	1.24E-08	22.314	0.021	Biological Process	GO:0045892	negative regulation of transcription, DNA-templated	1.24E-08	6.86E-08	0	0	27	1298
GO:0043297 apical junction assembly	8	1.25E-08	6.612	0.111	Biological Process	GO:0043297	apical junction assembly	1.25E-08	6.91E-08	0	0	8	72
GO:0050678 regulation of epithelial cell proliferation	15	1.27E-08	12.397	0.039	Biological Process	GO:0050678	regulation of epithelial cell proliferation	1.27E-08	6.99E-08	0	0	15	386
GO:1904036 negative regulation of epithelial cell apoptotic process	7	1.30E-08	5.785	0.149	Biological Process	GO:1904036	negative regulation of epithelial cell apoptotic process	1.30E-08	7.16E-08	0	0	7	47
GO:0008406 gonad development	12	1.31E-08	9.917	0.053	Biological Process	GO:0008406	gonad development	1.31E-08	7.22E-08	0	0	12	226
GO:0051924 regulation of calcium ion transport	13	1.32E-08	10.744	0.047	Biological Process	GO:0051924	regulation of calcium ion transport	1.32E-08	7.28E-08	0	0	13	276
GO:0006665 sphingolipid metabolic process	11	1.35E-08	9.091	0.061	Biological Process	GO:0006665	sphingolipid metabolic process	1.35E-08	7.43E-08	0	0	11	181
GO:0045123 cellular extravasation	8	1.40E-08	6.612	0.11	Biological Process	GO:0045123	cellular extravasation	1.40E-08	7.67E-08	0	0	8	73
GO:0043542 endothelial cell migration	13	1.50E-08	10.744	0.047	Biological Process	GO:0043542	endothelial cell migration	1.50E-08	8.24E-08	0	0	13	279
GO:0072659 protein localization to plasma membrane	13	1.50E-08	10.744	0.047	Biological Process	GO:0072659	protein localization to plasma membrane	1.50E-08	8.24E-08	0	0	13	279
GO:0032091 negative regulation of protein binding	9	1.51E-08	7.438	0.086	Biological Process	GO:0032091	negative regulation of protein binding	1.51E-08	8.26E-08	0	0	9	105
GO:0048771 tissue remodeling	11	1.52E-08	9.091	0.06	Biological Process	GO:0048771	tissue remodeling	1.52E-08	8.29E-08	0	0	11	183
GO:0007548 sex differentiation	13	1.64E-08	10.744	0.046	Biological Process	GO:0007548	sex differentiation	1.64E-08	8.94E-08	0	0	13	281
GO:0010522 regulation of calcium ion transport into cytosol	9	1.64E-08	7.438	0.085	Biological Process	GO:0010522	regulation of calcium ion transport into cytosol	1.64E-08	8.96E-08	0	0	9	106
GO:0060359 response to ammonium ion	10	1.67E-08	8.264	0.07	Biological Process	GO:0060359	response to ammonium ion	1.67E-08	9.09E-08	0	0	10	143
GO:0070588 calcium ion transmembrane transport	14	1.67E-08	11.57	0.042	Biological Process	GO:0070588	calcium ion transmembrane transport	1.67E-08	9.11E-08	0	0	14	336
GO:0071375 cellular response to peptide hormone stimulus	14	1.67E-08	11.57	0.042	Biological Process	GO:0071375	cellular response to peptide hormone stimulus	1.67E-08	9.11E-08	0	0	14	336
GO:0061180 mammary gland epithelium development	8	1.74E-08	6.612	0.107	Biological Process	GO:0061180	mammary gland epithelium development	1.74E-08	9.43E-08	0	0	8	75
GO:0010594 regulation of endothelial cell migration	12	1.75E-08	9.917	0.052	Biological Process	GO:0010594	regulation of endothelial cell migration	1.75E-08	9.52E-08	0	0	12	232
GO:0045137 development of primary sexual characteristics	12	1.75E-08	9.917	0.052	Biological Process	GO:0045137	development of primary sexual characteristics	1.75E-08	9.52E-08	0	0	12	232
GO:0030866 cortical actin cytoskeleton organization	7	1.76E-08	5.785	0.143	Biological Process	GO:0030866	cortical actin cytoskeleton organization	1.76E-08	9.52E-08	0	0	7	49
GO:0009897 external side of plasma membrane	17	6.67E-09	13.934	0.033	Cellular Component	GO:0009897	external side of plasma membrane	6.67E-09	9.79E-08	0	0	17	516
GO:0070838 divalent metal ion transport	17	1.89E-08	14.05	0.032	Biological Process	GO:0070838	divalent metal ion transport	1.89E-08	1.02E-07	0	0	17	525
GO:0006366 transcription by RNA polymerase II	43	1.93E-08	35.537	0.014	Biological Process	GO:0006366	transcription by RNA polymerase II	1.93E-08	1.05E-07	0	0	43	3003
GO:0098754 detoxification	10	2.04E-08	8.264	0.068	Biological Process	GO:0098754	detoxification	2.04E-08	1.10E-07	0	0	10	146
GO:0072657 protein localization to membrane	19	2.10E-08	15.702	0.028	Biological Process	GO:0072657	protein localization to membrane	2.10E-08	1.13E-07	0	0	19	669
GO:0072511 divalent inorganic cation transport	17	2.11E-08	14.05	0.032	Biological Process	GO:0072511	divalent inorganic cation transport	2.11E-08	1.14E-07	0	0	17	529
GO:0043270 positive regulation of ion transport	13	2.19E-08	10.744	0.045	Biological Process	GO:0043270	positive regulation of ion transport	2.19E-08	1.18E-07	0	0	13	288
GO:0060322 head development	21	2.27E-08	17.355	0.025	Biological Process	GO:0060322	head development	2.27E-08	1.22E-07	0	0	21	824
GO:0000271 polysaccharide biosynthetic process	8	2.38E-08	6.612	0.103	Biological Process	GO:0000271	polysaccharide biosynthetic process	2.38E-08	1.27E-07	0	0	8	78
GO:0045670 regulation of osteoclast differentiation	8	2.38E-08	6.612	0.103	Biological Process	GO:0045670	regulation of osteoclast differentiation	2.38E-08	1.27E-07	0	0	8	78
GO:0051881 regulation of mitochondrial membrane potential	8	2.38E-08	6.612	0.103	Biological Process	GO:0051881	regulation of mitochondrial membrane potential	2.38E-08	1.27E-07	0	0	8	78
GO:0006939 smooth muscle contraction	9	2.46E-08	7.438	0.081	Biological Process	GO:0006939	smooth muscle contraction	2.46E-08	1.32E-07	0	0	9	111
GO:0007612 learning	10	2.47E-08	8.264	0.067	Biological Process	GO:0007612	learning	2.47E-08	1.32E-07	0	0	10	149
GO:0043467 regulation of generation of precursor metabolites and energy	10	2.47E-08	8.264	0.067	Biological Process	GO:0043467	regulation of generation of precursor metabolites and energy	2.47E-08	1.32E-07	0	0	10	149
GO:0008217 regulation of blood pressure	11	2.49E-08	9.091	0.057	Biological Process	GO:0008217	regulation of blood pressure	2.49E-08	1.33E-07	0	0	11	192
GO:0010827 regulation of glucose transmembrane transport	8	2.63E-08	6.612	0.101	Biological Process	GO:0010827	regulation of glucose transmembrane transport	2.63E-08	1.40E-07	0	0	8	79
GO:0030193 regulation of blood coagulation	8	2.63E-08	6.612	0.101	Biological Process	GO:0030193	regulation of blood coagulation	2.63E-08	1.40E-07	0	0	8	79
GO:1902117 positive regulation of organelle assembly	8	2.63E-08	6.612	0.101	Biological Process	GO:1902117	positive regulation of organelle assembly	2.63E-08	1.40E-07	0	0	8	79
GO:0008289 lipid binding	21	5.67E-09	17.213	0.028	Molecular Function	GO:0008289	lipid binding	5.67E-09	1.44E-07	0	0	21	763
GO:0048471 perinuclear region of cytoplasm	20	1.05E-08	16.393	0.027	Cellular Component	GO:0048471	perinuclear region of cytoplasm	1.05E-08	1.47E-07	0	0	20	752
GO:0042995 cell projection	36	1.06E-08	29.508	0.016	Cellular Component	GO:0042995	cell projection	1.06E-08	1.47E-07	0	0	36	2288
GO:0044212 transcription regulatory region DNA binding	24	6.07E-09	19.672	0.024	Molecular Function	GO:0044212	transcription regulatory region DNA binding	6.07E-09	1.49E-07	0	0	24	1002
GO:0043900 regulation of multi-organism process	16	2.80E-08	13.223	0.034	Biological Process	GO:0043900	regulation of multi-organism process	2.80E-08	1.49E-07	0	0	16	473
GO:0001067 regulatory region nucleic acid binding	24	6.31E-09	19.672	0.024	Molecular Function	GO:0001067	regulatory region nucleic acid binding	6.31E-09	1.49E-07	0	0	24	1004
GO:0071887 leukocyte apoptotic process	9	2.88E-08	7.438	0.08	Biological Process	GO:0071887	leukocyte apoptotic process	2.88E-08	1.53E-07	0	0	9	113
GO:0043169 cation binding	57	6.72E-09	46.721	0.012	Molecular Function	GO:0043169	cation binding	6.72E-09	1.54E-07	0	0	57	4643
GO:1900046 regulation of hemostasis	8	2.91E-08	6.612	0.1	Biological Process	GO:1900046	regulation of hemostasis	2.91E-08	1.54E-07	0	0	8	80
GO:0010632 regulation of epithelial cell migration	13	2.91E-08	10.744	0.044	Biological Process	GO:0010632	regulation of epithelial cell migration	2.91E-08	1.54E-07	0	0	13	295
GO:0051253 negative regulation of RNA metabolic process	28	2.94E-08	23.14	0.019	Biological Process	GO:0051253	negative regulation of RNA metabolic process	2.94E-08	1.56E-07	0	0	28	1446
GO:1903507 negative regulation of nucleic acid-templated transcription	27	2.95E-08	22.314	0.02	Biological Process	GO:1903507	negative regulation of nucleic acid-templated transcription	2.95E-08	1.56E-07	0	0	27	1353
GO:0008643 carbohydrate transport	10	2.99E-08	8.264	0.066	Biological Process	GO:0008643	carbohydrate transport	2.99E-08	1.58E-07	0	0	10	152
GO:1902679 negative regulation of RNA biosynthetic process	27	3.04E-08	22.314	0.02	Biological Process	GO:1902679	negative regulation of RNA biosynthetic process	3.04E-08	1.61E-07	0	0	27	1355
GO:0003012 muscle system process	16	3.15E-08	13.223	0.034	Biological Process	GO:0003012	muscle system process	3.15E-08	1.66E-07	0	0	16	477
GO:0046777 protein autophosphorylation	12	3.36E-08	9.917	0.049	Biological Process	GO:0046777	protein autophosphorylation	3.36E-08	1.77E-07	0	0	12	246
GO:0055085 transmembrane transport	31	3.49E-08	25.62	0.018	Biological Process	GO:0055085	transmembrane transport	3.49E-08	1.84E-07	0	0	31	1750
GO:0030865 cortical cytoskeleton organization	7	3.53E-08	5.785	0.13	Biological Process	GO:0030865	cortical cytoskeleton organization	3.53E-08	1.86E-07	0	0	7	54
GO:0050850 positive regulation of calcium-mediated signaling	7	3.53E-08	5.785	0.13	Biological Process	GO:0050850	positive regulation of calcium-mediated signaling	3.53E-08	1.86E-07	0	0	7	54
GO:0032515 negative regulation of phosphoprotein phosphatase activity	8	3.54E-08	6.612	0.098	Biological Process	GO:0032515	negative regulation of phosphoprotein phosphatase activity	3.54E-08	1.86E-07	0	0	8	82
GO:0045685 regulation of glial cell differentiation	8	3.54E-08	6.612	0.098	Biological Process	GO:0045685	regulation of glial cell differentiation	3.54E-08	1.86E-07	0	0	8	82
GO:0045913 positive regulation of carbohydrate metabolic process	8	3.54E-08	6.612	0.098	Biological Process	GO:0045913	positive regulation of carbohydrate metabolic process	3.54E-08	1.86E-07	0	0	8	82
GO:0043565 sequence-specific DNA binding	26	8.50E-09	21.311	0.022	Molecular Function	GO:0043565	sequence-specific DNA binding	8.50E-09	1.88E-07	0	0	26	1190
GO:0010959 regulation of metal ion transport	15	3.64E-08	12.397	0.036	Biological Process	GO:0010959	regulation of metal ion transport	3.64E-08	1.91E-07	0	0	15	418
GO:0043168 anion binding	44	8.93E-09	36.066	0.014	Molecular Function	GO:0043168	anion binding	8.93E-09	1.92E-07	0	0	44	3050
GO:0051129 negative regulation of cellular component organization	20	3.75E-08	16.529	0.026	Biological Process	GO:0051129	negative regulation of cellular component organization	3.75E-08	1.96E-07	0	0	20	770
GO:0045732 positive regulation of protein catabolic process	12	4.19E-08	9.917	0.048	Biological Process	GO:0045732	positive regulation of protein catabolic process	4.19E-08	2.19E-07	0	0	12	251
GO:0071248 cellular response to metal ion	11	4.20E-08	9.091	0.054	Biological Process	GO:0071248	cellular response to metal ion	4.20E-08	2.20E-07	0	0	11	202
GO:0120025 plasma membrane bounded cell projection	35	1.64E-08	28.689	0.016	Cellular Component	GO:0120025	plasma membrane bounded cell projection	1.64E-08	2.21E-07	0	0	35	2215
GO:0001890 placenta development	10	4.32E-08	8.264	0.063	Biological Process	GO:0001890	placenta development	4.32E-08	2.26E-07	0	0	10	158
GO:0035234 ectopic germ cell programmed cell death	4	4.43E-08	3.306	0.571	Biological Process	GO:0035234	ectopic germ cell programmed cell death	4.43E-08	2.31E-07	0	0	4	7
GO:0009890 negative regulation of biosynthetic process	31	4.59E-08	25.62	0.018	Biological Process	GO:0009890	negative regulation of biosynthetic process	4.59E-08	2.39E-07	0	0	31	1771
GO:0043507 positive regulation of JUN kinase activity	8	4.71E-08	6.612	0.094	Biological Process	GO:0043507	positive regulation of JUN kinase activity	4.71E-08	2.44E-07	0	0	8	85
GO:0050805 negative regulation of synaptic transmission	8	4.71E-08	6.612	0.094	Biological Process	GO:0050805	negative regulation of synaptic transmission	4.71E-08	2.44E-07	0	0	8	85
GO:0050818 regulation of coagulation	8	4.71E-08	6.612	0.094	Biological Process	GO:0050818	regulation of coagulation	4.71E-08	2.44E-07	0	0	8	85
GO:0051279 regulation of release of sequestered calcium ion into cytosol	8	4.71E-08	6.612	0.094	Biological Process	GO:0051279	regulation of release of sequestered calcium ion into cytosol	4.71E-08	2.44E-07	0	0	8	85
GO:0006109 regulation of carbohydrate metabolic process	11	4.89E-08	9.091	0.054	Biological Process	GO:0006109	regulation of carbohydrate metabolic process	4.89E-08	2.53E-07	0	0	11	205
GO:2000352 negative regulation of endothelial cell apoptotic process	6	5.13E-08	4.959	0.176	Biological Process	GO:2000352	negative regulation of endothelial cell apoptotic process	5.13E-08	2.66E-07	0	0	6	34
GO:0010558 negative regulation of macromolecule biosynthetic process	30	5.17E-08	24.793	0.018	Biological Process	GO:0010558	negative regulation of macromolecule biosynthetic process	5.17E-08	2.67E-07	0	0	30	1680
GO:1903522 regulation of blood circulation	13	5.40E-08	10.744	0.042	Biological Process	GO:1903522	regulation of blood circulation	5.40E-08	2.79E-07	0	0	13	311
GO:0007423 sensory organ development	17	5.48E-08	14.05	0.03	Biological Process	GO:0007423	sensory organ development	5.48E-08	2.83E-07	0	0	17	565
GO:0018107 peptidyl-threonine phosphorylation	9	5.62E-08	7.438	0.074	Biological Process	GO:0018107	peptidyl-threonine phosphorylation	5.62E-08	2.90E-07	0	0	9	122
GO:0034637 cellular carbohydrate biosynthetic process	8	5.66E-08	6.612	0.092	Biological Process	GO:0034637	cellular carbohydrate biosynthetic process	5.66E-08	2.92E-07	0	0	8	87
GO:0030098 lymphocyte differentiation	14	5.77E-08	11.57	0.038	Biological Process	GO:0030098	lymphocyte differentiation	5.77E-08	2.97E-07	0	0	14	371
GO:0097193 intrinsic apoptotic signaling pathway	13	5.82E-08	10.744	0.042	Biological Process	GO:0097193	intrinsic apoptotic signaling pathway	5.82E-08	3.00E-07	0	0	13	313
GO:0001541 ovarian follicle development	7	5.88E-08	5.785	0.121	Biological Process	GO:0001541	ovarian follicle development	5.88E-08	3.02E-07	0	0	7	58
GO:0030522 intracellular receptor signaling pathway	13	6.04E-08	10.744	0.041	Biological Process	GO:0030522	intracellular receptor signaling pathway	6.04E-08	3.10E-07	0	0	13	314
GO:0042113 B cell activation	14	6.16E-08	11.57	0.038	Biological Process	GO:0042113	B cell activation	6.16E-08	3.16E-07	0	0	14	373
GO:0009755 hormone-mediated signaling pathway	12	6.17E-08	9.917	0.046	Biological Process	GO:0009755	hormone-mediated signaling pathway	6.17E-08	3.16E-07	0	0	12	260
GO:0045216 cell-cell junction organization	10	6.90E-08	8.264	0.06	Biological Process	GO:0045216	cell-cell junction organization	6.90E-08	3.53E-07	0	0	10	166
GO:0097159 organic cyclic compound binding	72	1.77E-08	59.016	0.01	Molecular Function	GO:0097159	organic cyclic compound binding	1.77E-08	3.59E-07	0	0	72	6913
GO:0060089 molecular transducer activity	33	1.78E-08	27.049	0.017	Molecular Function	GO:0060089	molecular transducer activity	1.78E-08	3.59E-07	0	0	33	1905
GO:0005975 carbohydrate metabolic process	18	7.17E-08	14.876	0.028	Biological Process	GO:0005975	carbohydrate metabolic process	7.17E-08	3.67E-07	0	0	18	648
GO:0001776 leukocyte homeostasis	8	7.39E-08	6.612	0.089	Biological Process	GO:0001776	leukocyte homeostasis	7.39E-08	3.78E-07	0	0	8	90
GO:0019229 regulation of vasoconstriction	7	7.48E-08	5.785	0.117	Biological Process	GO:0019229	regulation of vasoconstriction	7.48E-08	3.82E-07	0	0	7	60
GO:0002440 production of molecular mediator of immune response	14	7.50E-08	11.57	0.037	Biological Process	GO:0002440	production of molecular mediator of immune response	7.50E-08	3.83E-07	0	0	14	379
GO:0004672 protein kinase activity	19	1.95E-08	15.574	0.028	Molecular Function	GO:0004672	protein kinase activity	1.95E-08	3.83E-07	0	0	19	668
GO:0050863 regulation of T cell activation	14	8.01E-08	11.57	0.037	Biological Process	GO:0050863	regulation of T cell activation	8.01E-08	4.08E-07	0	0	14	381
GO:0034103 regulation of tissue remodeling	8	8.06E-08	6.612	0.088	Biological Process	GO:0034103	regulation of tissue remodeling	8.06E-08	4.11E-07	0	0	8	91
GO:1901654 response to ketone	11	8.33E-08	9.091	0.051	Biological Process	GO:1901654	response to ketone	8.33E-08	4.24E-07	0	0	11	216
GO:0001952 regulation of cell-matrix adhesion	9	8.52E-08	7.438	0.07	Biological Process	GO:0001952	regulation of cell-matrix adhesion	8.52E-08	4.33E-07	0	0	9	128
GO:0016051 carbohydrate biosynthetic process	11	8.73E-08	9.091	0.051	Biological Process	GO:0016051	carbohydrate biosynthetic process	8.73E-08	4.43E-07	0	0	11	217
GO:1903708 positive regulation of hemopoiesis	11	8.73E-08	9.091	0.051	Biological Process	GO:1903708	positive regulation of hemopoiesis	8.73E-08	4.43E-07	0	0	11	217
GO:0035308 negative regulation of protein dephosphorylation	8	8.79E-08	6.612	0.087	Biological Process	GO:0035308	negative regulation of protein dephosphorylation	8.79E-08	4.45E-07	0	0	8	92
GO:0016049 cell growth	16	9.04E-08	13.223	0.031	Biological Process	GO:0016049	cell growth	9.04E-08	4.58E-07	0	0	16	515
GO:0015718 monocarboxylic acid transport	10	9.64E-08	8.264	0.058	Biological Process	GO:0015718	monocarboxylic acid transport	9.64E-08	4.88E-07	0	0	10	172
GO:0018210 peptidyl-threonine modification	9	9.74E-08	7.438	0.069	Biological Process	GO:0018210	peptidyl-threonine modification	9.74E-08	4.93E-07	0	0	9	130
GO:0051726 regulation of cell cycle	26	9.83E-08	21.488	0.019	Biological Process	GO:0051726	regulation of cell cycle	9.83E-08	4.96E-07	0	0	26	1340
GO:0097164 ammonium ion metabolic process	11	1.00E-07	9.091	0.05	Biological Process	GO:0097164	ammonium ion metabolic process	1.00E-07	5.06E-07	0	0	11	220
GO:0048666 neuron development	24	1.02E-07	19.835	0.021	Biological Process	GO:0048666	neuron development	1.02E-07	5.13E-07	0	0	24	1159
GO:0061564 axon development	16	1.03E-07	13.223	0.031	Biological Process	GO:0061564	axon development	1.03E-07	5.19E-07	0	0	16	520
GO:0070920 regulation of production of small RNA involved in gene silencing by RNA	5	1.09E-07	4.132	0.25	Biological Process	GO:0070920	regulation of production of small RNA involved in gene silencing by RNA	1.09E-07	5.46E-07	0	0	5	20
GO:0007043 cell-cell junction assembly	9	1.11E-07	7.438	0.068	Biological Process	GO:0007043	cell-cell junction assembly	1.11E-07	5.59E-07	0	0	9	132
GO:0006914 autophagy	16	1.12E-07	13.223	0.031	Biological Process	GO:0006914	autophagy	1.12E-07	5.60E-07	0	0	16	523
GO:0061919 process utilizing autophagic mechanism	16	1.12E-07	13.223	0.031	Biological Process	GO:0061919	process utilizing autophagic mechanism	1.12E-07	5.60E-07	0	0	16	523
GO:0002698 negative regulation of immune effector process	10	1.20E-07	8.264	0.057	Biological Process	GO:0002698	negative regulation of immune effector process	1.20E-07	6.00E-07	0	0	10	176
GO:0008134 transcription factor binding	19	3.19E-08	15.574	0.028	Molecular Function	GO:0008134	transcription factor binding	3.19E-08	6.09E-07	0	0	19	689
GO:0038023 signaling receptor activity	32	3.29E-08	26.23	0.017	Molecular Function	GO:0038023	signaling receptor activity	3.29E-08	6.09E-07	0	0	32	1851
GO:1990778 protein localization to cell periphery	13	1.24E-07	10.744	0.039	Biological Process	GO:1990778	protein localization to cell periphery	1.24E-07	6.20E-07	0	0	13	334
GO:0031327 negative regulation of cellular biosynthetic process	30	1.24E-07	24.793	0.017	Biological Process	GO:0031327	negative regulation of cellular biosynthetic process	1.24E-07	6.21E-07	0	0	30	1748
GO:0031983 vesicle lumen	14	4.87E-08	11.475	0.036	Cellular Component	GO:0031983	vesicle lumen	4.87E-08	6.37E-07	0	0	14	386
GO:0043903 regulation of symbiosis, encompassing mutualism through parasitism	12	1.28E-07	9.917	0.043	Biological Process	GO:0043903	regulation of symbiosis, encompassing mutualism through parasitism	1.28E-07	6.39E-07	0	0	12	278
GO:0043255 regulation of carbohydrate biosynthetic process	8	1.33E-07	6.612	0.082	Biological Process	GO:0043255	regulation of carbohydrate biosynthetic process	1.33E-07	6.64E-07	0	0	8	97
GO:0019752 carboxylic acid metabolic process	24	1.33E-07	19.835	0.02	Biological Process	GO:0019752	carboxylic acid metabolic process	1.33E-07	6.65E-07	0	0	24	1176
GO:0030183 B cell differentiation	9	1.35E-07	7.438	0.067	Biological Process	GO:0030183	B cell differentiation	1.35E-07	6.72E-07	0	0	9	135
GO:0048525 negative regulation of viral process	9	1.35E-07	7.438	0.067	Biological Process	GO:0048525	negative regulation of viral process	1.35E-07	6.72E-07	0	0	9	135
GO:0010869 regulation of receptor biosynthetic process	5	1.42E-07	4.132	0.238	Biological Process	GO:0010869	regulation of receptor biosynthetic process	1.42E-07	7.06E-07	0	0	5	21
GO:0060291 long-term synaptic potentiation	8	1.44E-07	6.612	0.082	Biological Process	GO:0060291	long-term synaptic potentiation	1.44E-07	7.16E-07	0	0	8	98
GO:0046824 positive regulation of nucleocytoplasmic transport	7	1.46E-07	5.785	0.106	Biological Process	GO:0046824	positive regulation of nucleocytoplasmic transport	1.46E-07	7.26E-07	0	0	7	66
GO:0060135 maternal process involved in female pregnancy	7	1.46E-07	5.785	0.106	Biological Process	GO:0060135	maternal process involved in female pregnancy	1.46E-07	7.26E-07	0	0	7	66
GO:1903900 regulation of viral life cycle	10	1.48E-07	8.264	0.056	Biological Process	GO:1903900	regulation of viral life cycle	1.48E-07	7.32E-07	0	0	10	180
GO:0010506 regulation of autophagy	13	1.52E-07	10.744	0.038	Biological Process	GO:0010506	regulation of autophagy	1.52E-07	7.53E-07	0	0	13	340
GO:0006139 nucleobase-containing compound metabolic process	67	1.52E-07	55.372	0.01	Biological Process	GO:0006139	nucleobase-containing compound metabolic process	1.52E-07	7.53E-07	0	0	67	6471
GO:0016773 phosphotransferase activity, alcohol group as acceptor	20	4.24E-08	16.393	0.026	Molecular Function	GO:0016773	phosphotransferase activity, alcohol group as acceptor	4.24E-08	7.65E-07	0	0	20	778
GO:0043506 regulation of JUN kinase activity	8	1.56E-07	6.612	0.081	Biological Process	GO:0043506	regulation of JUN kinase activity	1.56E-07	7.71E-07	0	0	8	99
GO:0001818 negative regulation of cytokine production	13	1.57E-07	10.744	0.038	Biological Process	GO:0001818	negative regulation of cytokine production	1.57E-07	7.75E-07	0	0	13	341
GO:0071214 cellular response to abiotic stimulus	13	1.57E-07	10.744	0.038	Biological Process	GO:0071214	cellular response to abiotic stimulus	1.57E-07	7.75E-07	0	0	13	341
GO:0104004 cellular response to environmental stimulus	13	1.57E-07	10.744	0.038	Biological Process	GO:0104004	cellular response to environmental stimulus	1.57E-07	7.75E-07	0	0	13	341
GO:0032869 cellular response to insulin stimulus	11	1.57E-07	9.091	0.048	Biological Process	GO:0032869	cellular response to insulin stimulus	1.57E-07	7.75E-07	0	0	11	230
GO:0009059 macromolecule biosynthetic process	61	1.60E-07	50.413	0.011	Biological Process	GO:0009059	macromolecule biosynthetic process	1.60E-07	7.90E-07	0	0	61	5604
GO:0019902 phosphatase binding	11	4.50E-08	9.016	0.054	Molecular Function	GO:0019902	phosphatase binding	4.50E-08	7.92E-07	0	0	11	204
GO:0043666 regulation of phosphoprotein phosphatase activity	9	1.63E-07	7.438	0.065	Biological Process	GO:0043666	regulation of phosphoprotein phosphatase activity	1.63E-07	8.01E-07	0	0	9	138
GO:0006643 membrane lipid metabolic process	11	1.64E-07	9.091	0.048	Biological Process	GO:0006643	membrane lipid metabolic process	1.64E-07	8.06E-07	0	0	11	231
GO:0071241 cellular response to inorganic substance	11	1.64E-07	9.091	0.048	Biological Process	GO:0071241	cellular response to inorganic substance	1.64E-07	8.06E-07	0	0	11	231
GO:0045934 negative regulation of nucleobase-containing compound metabolic process	28	1.81E-07	23.14	0.018	Biological Process	GO:0045934	negative regulation of nucleobase-containing compound metabolic process	1.81E-07	8.90E-07	0	0	28	1577
GO:0015908 fatty acid transport	8	1.82E-07	6.612	0.079	Biological Process	GO:0015908	fatty acid transport	1.82E-07	8.93E-07	0	0	8	101
GO:0060149 negative regulation of posttranscriptional gene silencing	5	1.83E-07	4.132	0.227	Biological Process	GO:0060149	negative regulation of posttranscriptional gene silencing	1.83E-07	8.93E-07	0	0	5	22
GO:0060967 negative regulation of gene silencing by RNA	5	1.83E-07	4.132	0.227	Biological Process	GO:0060967	negative regulation of gene silencing by RNA	1.83E-07	8.93E-07	0	0	5	22
GO:1904062 regulation of cation transmembrane transport	13	1.92E-07	10.744	0.037	Biological Process	GO:1904062	regulation of cation transmembrane transport	1.92E-07	9.38E-07	0	0	13	347
GO:0010907 positive regulation of glucose metabolic process	6	1.92E-07	4.959	0.143	Biological Process	GO:0010907	positive regulation of glucose metabolic process	1.92E-07	9.38E-07	0	0	6	42
GO:0044262 cellular carbohydrate metabolic process	12	1.94E-07	9.917	0.042	Biological Process	GO:0044262	cellular carbohydrate metabolic process	1.94E-07	9.48E-07	0	0	12	289
GO:0070301 cellular response to hydrogen peroxide	8	1.97E-07	6.612	0.078	Biological Process	GO:0070301	cellular response to hydrogen peroxide	1.97E-07	9.59E-07	0	0	8	102
GO:0046323 glucose import	7	2.00E-07	5.785	0.101	Biological Process	GO:0046323	glucose import	2.00E-07	9.72E-07	0	0	7	69
GO:2000113 negative regulation of cellular macromolecule biosynthetic process	28	2.18E-07	23.14	0.018	Biological Process	GO:2000113	negative regulation of cellular macromolecule biosynthetic process	2.18E-07	1.06E-06	0	0	28	1591
GO:0043226 organelle	110	8.45E-08	90.164	0.007	Cellular Component	GO:0043226	organelle	8.45E-08	1.08E-06	0	0	110	14890
GO:0010863 positive regulation of phospholipase C activity	6	2.22E-07	4.959	0.14	Biological Process	GO:0010863	positive regulation of phospholipase C activity	2.22E-07	1.08E-06	0	0	6	43
GO:0035303 regulation of dephosphorylation	11	2.41E-07	9.091	0.046	Biological Process	GO:0035303	regulation of dephosphorylation	2.41E-07	1.17E-06	0	0	11	240
GO:0010517 regulation of phospholipase activity	7	2.44E-07	5.785	0.099	Biological Process	GO:0010517	regulation of phospholipase activity	2.44E-07	1.18E-06	0	0	7	71
GO:0043229 intracellular organelle	106	9.59E-08	86.885	0.008	Cellular Component	GO:0043229	intracellular organelle	9.59E-08	1.19E-06	0	0	106	13974
GO:0098552 side of membrane	19	9.93E-08	15.574	0.024	Cellular Component	GO:0098552	side of membrane	9.93E-08	1.20E-06	0	0	19	779
GO:0001894 tissue homeostasis	11	2.51E-07	9.091	0.046	Biological Process	GO:0001894	tissue homeostasis	2.51E-07	1.22E-06	0	0	11	241
GO:0006352 DNA-templated transcription, initiation	12	2.70E-07	9.917	0.04	Biological Process	GO:0006352	DNA-templated transcription, initiation	2.70E-07	1.31E-06	0	0	12	298
GO:0051588 regulation of neurotransmitter transport	9	2.79E-07	7.438	0.061	Biological Process	GO:0051588	regulation of neurotransmitter transport	2.79E-07	1.35E-06	0	0	9	147
GO:0060193 positive regulation of lipase activity	7	2.96E-07	5.785	0.096	Biological Process	GO:0060193	positive regulation of lipase activity	2.96E-07	1.43E-06	0	0	7	73
GO:0050921 positive regulation of chemotaxis	9	2.96E-07	7.438	0.061	Biological Process	GO:0050921	positive regulation of chemotaxis	2.96E-07	1.43E-06	0	0	9	148
GO:0061041 regulation of wound healing	9	2.96E-07	7.438	0.061	Biological Process	GO:0061041	regulation of wound healing	2.96E-07	1.43E-06	0	0	9	148
GO:0051348 negative regulation of transferase activity	12	3.01E-07	9.917	0.04	Biological Process	GO:0051348	negative regulation of transferase activity	3.01E-07	1.45E-06	0	0	12	301
GO:0006672 ceramide metabolic process	8	3.07E-07	6.612	0.074	Biological Process	GO:0006672	ceramide metabolic process	3.07E-07	1.48E-06	0	0	8	108
GO:0005996 monosaccharide metabolic process	12	3.12E-07	9.917	0.04	Biological Process	GO:0005996	monosaccharide metabolic process	3.12E-07	1.50E-06	0	0	12	302
GO:0008286 insulin receptor signaling pathway	9	3.13E-07	7.438	0.06	Biological Process	GO:0008286	insulin receptor signaling pathway	3.13E-07	1.51E-06	0	0	9	149
GO:0030182 neuron differentiation	26	3.26E-07	21.488	0.018	Biological Process	GO:0030182	neuron differentiation	3.26E-07	1.57E-06	0	0	26	1425
GO:0043235 receptor complex	14	1.34E-07	11.475	0.033	Cellular Component	GO:0043235	receptor complex	1.34E-07	1.58E-06	0	0	14	419
GO:0070661 leukocyte proliferation	13	3.42E-07	10.744	0.036	Biological Process	GO:0070661	leukocyte proliferation	3.42E-07	1.64E-06	0	0	13	365
GO:0044877 protein-containing complex binding	25	9.84E-08	20.492	0.02	Molecular Function	GO:0044877	protein-containing complex binding	9.84E-08	1.69E-06	0	0	25	1251
GO:0030424 axon	17	1.48E-07	13.934	0.027	Cellular Component	GO:0030424	axon	1.48E-07	1.71E-06	0	0	17	639
GO:0050792 regulation of viral process	11	3.63E-07	9.091	0.044	Biological Process	GO:0050792	regulation of viral process	3.63E-07	1.74E-06	0	0	11	250
GO:0006470 protein dephosphorylation	13	3.64E-07	10.744	0.035	Biological Process	GO:0006470	protein dephosphorylation	3.64E-07	1.74E-06	0	0	13	367
GO:0005768 endosome	22	1.56E-07	18.033	0.021	Cellular Component	GO:0005768	endosome	1.56E-07	1.75E-06	0	0	22	1064
GO:0001654 eye development	13	3.76E-07	10.744	0.035	Biological Process	GO:0001654	eye development	3.76E-07	1.80E-06	0	0	13	368
GO:0030425 dendrite	17	1.77E-07	13.934	0.026	Cellular Component	GO:0030425	dendrite	1.77E-07	1.95E-06	0	0	17	647
GO:0016070 RNA metabolic process	57	4.09E-07	47.107	0.011	Biological Process	GO:0016070	RNA metabolic process	4.09E-07	1.96E-06	0	0	57	5176
GO:0097447 dendritic tree	17	1.85E-07	13.934	0.026	Cellular Component	GO:0097447	dendritic tree	1.85E-07	1.99E-06	0	0	17	649
GO:0150063 visual system development	13	4.25E-07	10.744	0.035	Biological Process	GO:0150063	visual system development	4.25E-07	2.03E-06	0	0	13	372
GO:1900182 positive regulation of protein localization to nucleus	7	4.28E-07	5.785	0.091	Biological Process	GO:1900182	positive regulation of protein localization to nucleus	4.28E-07	2.04E-06	0	0	7	77
GO:0009408 response to heat	10	4.30E-07	8.264	0.05	Biological Process	GO:0009408	response to heat	4.30E-07	2.05E-06	0	0	10	202
GO:0001938 positive regulation of endothelial cell proliferation	8	4.35E-07	6.612	0.071	Biological Process	GO:0001938	positive regulation of endothelial cell proliferation	4.35E-07	2.07E-06	0	0	8	113
GO:1903901 negative regulation of viral life cycle	8	4.35E-07	6.612	0.071	Biological Process	GO:1903901	negative regulation of viral life cycle	4.35E-07	2.07E-06	0	0	8	113
GO:0001558 regulation of cell growth	14	4.36E-07	11.57	0.032	Biological Process	GO:0001558	regulation of cell growth	4.36E-07	2.07E-06	0	0	14	438
GO:0006812 cation transport	24	4.37E-07	19.835	0.019	Biological Process	GO:0006812	cation transport	4.37E-07	2.08E-06	0	0	24	1255
GO:1902652 secondary alcohol metabolic process	9	4.38E-07	7.438	0.058	Biological Process	GO:1902652	secondary alcohol metabolic process	4.38E-07	2.08E-06	0	0	9	155
GO:0030148 sphingolipid biosynthetic process	8	4.65E-07	6.612	0.07	Biological Process	GO:0030148	sphingolipid biosynthetic process	4.65E-07	2.21E-06	0	0	8	114
GO:0008306 associative learning	7	4.67E-07	5.785	0.09	Biological Process	GO:0008306	associative learning	4.67E-07	2.21E-06	0	0	7	78
GO:0019318 hexose metabolic process	11	4.77E-07	9.091	0.043	Biological Process	GO:0019318	hexose metabolic process	4.77E-07	2.26E-06	0	0	11	257
GO:0002683 negative regulation of immune system process	16	4.80E-07	13.223	0.027	Biological Process	GO:0002683	negative regulation of immune system process	4.80E-07	2.27E-06	0	0	16	583
GO:0005978 glycogen biosynthetic process	6	4.95E-07	4.959	0.122	Biological Process	GO:0005978	glycogen biosynthetic process	4.95E-07	2.34E-06	0	0	6	49
GO:0008542 visual learning	6	4.95E-07	4.959	0.122	Biological Process	GO:0008542	visual learning	4.95E-07	2.34E-06	0	0	6	49
GO:0009250 glucan biosynthetic process	6	4.95E-07	4.959	0.122	Biological Process	GO:0009250	glucan biosynthetic process	4.95E-07	2.34E-06	0	0	6	49
GO:0016575 histone deacetylation	7	5.10E-07	5.785	0.089	Biological Process	GO:0016575	histone deacetylation	5.10E-07	2.40E-06	0	0	7	79
GO:0043242 negative regulation of protein complex disassembly	7	5.10E-07	5.785	0.089	Biological Process	GO:0043242	negative regulation of protein complex disassembly	5.10E-07	2.40E-06	0	0	7	79
GO:0048678 response to axon injury	7	5.10E-07	5.785	0.089	Biological Process	GO:0048678	response to axon injury	5.10E-07	2.40E-06	0	0	7	79
GO:0071260 cellular response to mechanical stimulus	7	5.10E-07	5.785	0.089	Biological Process	GO:0071260	cellular response to mechanical stimulus	5.10E-07	2.40E-06	0	0	7	79
GO:0043436 oxoacid metabolic process	24	5.12E-07	19.835	0.019	Biological Process	GO:0043436	oxoacid metabolic process	5.12E-07	2.40E-06	0	0	24	1266
GO:0071236 cellular response to antibiotic	9	5.15E-07	7.438	0.057	Biological Process	GO:0071236	cellular response to antibiotic	5.15E-07	2.42E-06	0	0	9	158
GO:0007219 Notch signaling pathway	10	5.15E-07	8.264	0.049	Biological Process	GO:0007219	Notch signaling pathway	5.15E-07	2.42E-06	0	0	10	206
GO:0005976 polysaccharide metabolic process	8	5.31E-07	6.612	0.069	Biological Process	GO:0005976	polysaccharide metabolic process	5.31E-07	2.49E-06	0	0	8	116
GO:0070851 growth factor receptor binding	9	1.49E-07	7.377	0.066	Molecular Function	GO:0070851	growth factor receptor binding	1.49E-07	2.49E-06	0	0	9	137
GO:0030194 positive regulation of blood coagulation	5	5.47E-07	4.132	0.185	Biological Process	GO:0030194	positive regulation of blood coagulation	5.47E-07	2.56E-06	0	0	5	27
GO:1900048 positive regulation of hemostasis	5	5.47E-07	4.132	0.185	Biological Process	GO:1900048	positive regulation of hemostasis	5.47E-07	2.56E-06	0	0	5	27
GO:0043010 camera-type eye development	12	5.58E-07	9.917	0.038	Biological Process	GO:0043010	camera-type eye development	5.58E-07	2.61E-06	0	0	12	319
GO:1903727 positive regulation of phospholipid metabolic process	6	5.60E-07	4.959	0.12	Biological Process	GO:1903727	positive regulation of phospholipid metabolic process	5.60E-07	2.61E-06	0	0	6	50
GO:0010906 regulation of glucose metabolic process	8	5.68E-07	6.612	0.068	Biological Process	GO:0010906	regulation of glucose metabolic process	5.68E-07	2.65E-06	0	0	8	117
GO:0048880 sensory system development	13	5.90E-07	10.744	0.034	Biological Process	GO:0048880	sensory system development	5.90E-07	2.75E-06	0	0	13	383
GO:0019904 protein domain specific binding	19	1.71E-07	15.574	0.025	Molecular Function	GO:0019904	protein domain specific binding	1.71E-07	2.79E-06	0	0	19	767
GO:0007346 regulation of mitotic cell cycle	18	6.06E-07	14.876	0.024	Biological Process	GO:0007346	regulation of mitotic cell cycle	6.06E-07	2.82E-06	0	0	18	749
GO:0043244 regulation of protein complex disassembly	8	6.06E-07	6.612	0.068	Biological Process	GO:0043244	regulation of protein complex disassembly	6.06E-07	2.82E-06	0	0	8	118
GO:0005496 steroid binding	8	1.78E-07	6.557	0.079	Molecular Function	GO:0005496	steroid binding	1.78E-07	2.84E-06	0	0	8	101
GO:0050679 positive regulation of epithelial cell proliferation	10	6.15E-07	8.264	0.048	Biological Process	GO:0050679	positive regulation of epithelial cell proliferation	6.15E-07	2.86E-06	0	0	10	210
GO:0036094 small molecule binding	39	1.88E-07	31.967	0.014	Molecular Function	GO:0036094	small molecule binding	1.88E-07	2.91E-06	0	0	39	2776
GO:0001085 RNA polymerase II transcription factor binding	9	1.91E-07	7.377	0.064	Molecular Function	GO:0001085	RNA polymerase II transcription factor binding	1.91E-07	2.91E-06	0	0	9	141
GO:0016020 membrane	92	2.88E-07	75.41	0.008	Cellular Component	GO:0016020	membrane	2.88E-07	3.03E-06	0	0	92	11275
GO:0072347 response to anesthetic	7	6.59E-07	5.785	0.085	Biological Process	GO:0072347	response to anesthetic	6.59E-07	3.06E-06	0	0	7	82
GO:0050820 positive regulation of coagulation	5	6.62E-07	4.132	0.179	Biological Process	GO:0050820	positive regulation of coagulation	6.62E-07	3.07E-06	0	0	5	28
GO:0090316 positive regulation of intracellular protein transport	9	6.70E-07	7.438	0.055	Biological Process	GO:0090316	positive regulation of intracellular protein transport	6.70E-07	3.11E-06	0	0	9	163
GO:0006082 organic acid metabolic process	24	6.78E-07	19.835	0.019	Biological Process	GO:0006082	organic acid metabolic process	6.78E-07	3.14E-06	0	0	24	1286
GO:0045687 positive regulation of glial cell differentiation	6	7.10E-07	4.959	0.115	Biological Process	GO:0045687	positive regulation of glial cell differentiation	7.10E-07	3.29E-06	0	0	6	52
GO:0031175 neuron projection development	21	7.13E-07	17.355	0.021	Biological Process	GO:0031175	neuron projection development	7.13E-07	3.30E-06	0	0	21	1013
GO:0006006 glucose metabolic process	10	7.31E-07	8.264	0.047	Biological Process	GO:0006006	glucose metabolic process	7.31E-07	3.38E-06	0	0	10	214
GO:0060205 cytoplasmic vesicle lumen	13	3.42E-07	10.656	0.034	Cellular Component	GO:0060205	cytoplasmic vesicle lumen	3.42E-07	3.52E-06	0	0	13	385
GO:1902803 regulation of synaptic vesicle transport	7	7.78E-07	5.785	0.083	Biological Process	GO:1902803	regulation of synaptic vesicle transport	7.78E-07	3.59E-06	0	0	7	84
GO:0002262 myeloid cell homeostasis	9	7.80E-07	7.438	0.054	Biological Process	GO:0002262	myeloid cell homeostasis	7.80E-07	3.60E-06	0	0	9	166
GO:1900180 regulation of protein localization to nucleus	8	7.82E-07	6.612	0.066	Biological Process	GO:1900180	regulation of protein localization to nucleus	7.82E-07	3.60E-06	0	0	8	122
GO:0042391 regulation of membrane potential	14	7.83E-07	11.57	0.03	Biological Process	GO:0042391	regulation of membrane potential	7.83E-07	3.61E-06	0	0	14	460
GO:0005979 regulation of glycogen biosynthetic process	5	7.96E-07	4.132	0.172	Biological Process	GO:0005979	regulation of glycogen biosynthetic process	7.96E-07	3.66E-06	0	0	5	29
GO:0010962 regulation of glucan biosynthetic process	5	7.96E-07	4.132	0.172	Biological Process	GO:0010962	regulation of glucan biosynthetic process	7.96E-07	3.66E-06	0	0	5	29
GO:0046914 transition metal ion binding	24	2.52E-07	19.672	0.02	Molecular Function	GO:0046914	transition metal ion binding	2.52E-07	3.68E-06	0	0	24	1221
GO:0043176 amine binding	4	2.59E-07	3.279	0.4	Molecular Function	GO:0043176	amine binding	2.59E-07	3.68E-06	0	0	4	10
GO:0051378 serotonin binding	4	2.59E-07	3.279	0.4	Molecular Function	GO:0051378	serotonin binding	2.59E-07	3.68E-06	0	0	4	10
GO:0004714 transmembrane receptor protein tyrosine kinase activity	7	2.63E-07	5.738	0.097	Molecular Function	GO:0004714	transmembrane receptor protein tyrosine kinase activity	2.63E-07	3.68E-06	0	0	7	72
GO:0065003 protein-containing complex assembly	32	8.54E-07	26.446	0.015	Biological Process	GO:0065003	protein-containing complex assembly	8.54E-07	3.92E-06	0	0	32	2129
GO:1901566 organonitrogen compound biosynthetic process	32	8.63E-07	26.446	0.015	Biological Process	GO:1901566	organonitrogen compound biosynthetic process	8.63E-07	3.96E-06	0	0	32	2130
GO:1903706 regulation of hemopoiesis	15	8.84E-07	12.397	0.028	Biological Process	GO:1903706	regulation of hemopoiesis	8.84E-07	4.05E-06	0	0	15	536
GO:0022612 gland morphogenesis	8	8.85E-07	6.612	0.065	Biological Process	GO:0022612	gland morphogenesis	8.85E-07	4.05E-06	0	0	8	124
GO:0007632 visual behavior	6	8.92E-07	4.959	0.111	Biological Process	GO:0007632	visual behavior	8.92E-07	4.08E-06	0	0	6	54
GO:0010524 positive regulation of calcium ion transport into cytosol	6	8.92E-07	4.959	0.111	Biological Process	GO:0010524	positive regulation of calcium ion transport into cytosol	8.92E-07	4.08E-06	0	0	6	54
GO:0045840 positive regulation of mitotic nuclear division	6	8.92E-07	4.959	0.111	Biological Process	GO:0045840	positive regulation of mitotic nuclear division	8.92E-07	4.08E-06	0	0	6	54
GO:0099699 integral component of synaptic membrane	9	4.07E-07	7.377	0.056	Cellular Component	GO:0099699	integral component of synaptic membrane	4.07E-07	4.10E-06	0	0	9	162
GO:0042562 hormone binding	8	2.99E-07	6.557	0.074	Molecular Function	GO:0042562	hormone binding	2.99E-07	4.11E-06	0	0	8	108
GO:0042058 regulation of epidermal growth factor receptor signaling pathway	7	9.13E-07	5.785	0.081	Biological Process	GO:0042058	regulation of epidermal growth factor receptor signaling pathway	9.13E-07	4.17E-06	0	0	7	86
GO:0060249 anatomical structure homeostasis	14	9.36E-07	11.57	0.03	Biological Process	GO:0060249	anatomical structure homeostasis	9.36E-07	4.27E-06	0	0	14	467
GO:0034645 cellular macromolecule biosynthetic process	58	9.60E-07	47.934	0.011	Biological Process	GO:0034645	cellular macromolecule biosynthetic process	9.60E-07	4.37E-06	0	0	58	5444
GO:0061061 muscle structure development	17	9.70E-07	14.05	0.025	Biological Process	GO:0061061	muscle structure development	9.70E-07	4.42E-06	0	0	17	693
GO:0045637 regulation of myeloid cell differentiation	11	9.99E-07	9.091	0.04	Biological Process	GO:0045637	regulation of myeloid cell differentiation	9.99E-07	4.55E-06	0	0	11	277
GO:0042734 presynaptic membrane	9	4.75E-07	7.377	0.055	Cellular Component	GO:0042734	presynaptic membrane	4.75E-07	4.69E-06	0	0	9	165
GO:0045861 negative regulation of proteolysis	13	1.04E-06	10.744	0.032	Biological Process	GO:0045861	negative regulation of proteolysis	1.04E-06	4.75E-06	0	0	13	403
GO:0010810 regulation of cell-substrate adhesion	10	1.06E-06	8.264	0.045	Biological Process	GO:0010810	regulation of cell-substrate adhesion	1.06E-06	4.83E-06	0	0	10	223
GO:0019903 protein phosphatase binding	9	3.61E-07	7.377	0.059	Molecular Function	GO:0019903	protein phosphatase binding	3.61E-07	4.86E-06	0	0	9	152
GO:0016301 kinase activity	20	3.76E-07	16.393	0.022	Molecular Function	GO:0016301	kinase activity	3.76E-07	4.96E-06	0	0	20	891
GO:0048598 embryonic morphogenesis	16	1.10E-06	13.223	0.026	Biological Process	GO:0048598	embryonic morphogenesis	1.10E-06	5.00E-06	0	0	16	621
GO:0090304 nucleic acid metabolic process	60	1.10E-06	49.587	0.01	Biological Process	GO:0090304	nucleic acid metabolic process	1.10E-06	5.00E-06	0	0	60	5752
GO:0042220 response to cocaine	6	1.11E-06	4.959	0.107	Biological Process	GO:0042220	response to cocaine	1.11E-06	5.03E-06	0	0	6	56
GO:0007409 axonogenesis	14	1.12E-06	11.57	0.03	Biological Process	GO:0007409	axonogenesis	1.12E-06	5.05E-06	0	0	14	474
GO:0010923 negative regulation of phosphatase activity	8	1.13E-06	6.612	0.062	Biological Process	GO:0010923	negative regulation of phosphatase activity	1.13E-06	5.09E-06	0	0	8	128
GO:0046651 lymphocyte proliferation	12	1.13E-06	9.917	0.035	Biological Process	GO:0046651	lymphocyte proliferation	1.13E-06	5.09E-06	0	0	12	341
GO:0045742 positive regulation of epidermal growth factor receptor signaling pathway	5	1.13E-06	4.132	0.161	Biological Process	GO:0045742	positive regulation of epidermal growth factor receptor signaling pathway	1.13E-06	5.10E-06	0	0	5	31
GO:0032943 mononuclear cell proliferation	12	1.20E-06	9.917	0.035	Biological Process	GO:0032943	mononuclear cell proliferation	1.20E-06	5.41E-06	0	0	12	343
GO:1903351 cellular response to dopamine	4	1.23E-06	3.306	0.286	Biological Process	GO:1903351	cellular response to dopamine	1.23E-06	5.53E-06	0	0	4	14
GO:1903035 negative regulation of response to wounding	7	1.24E-06	5.785	0.078	Biological Process	GO:1903035	negative regulation of response to wounding	1.24E-06	5.61E-06	0	0	7	90
GO:0030900 forebrain development	13	1.30E-06	10.744	0.032	Biological Process	GO:0030900	forebrain development	1.30E-06	5.85E-06	0	0	13	411
GO:0060326 cell chemotaxis	12	1.31E-06	9.917	0.035	Biological Process	GO:0060326	cell chemotaxis	1.31E-06	5.90E-06	0	0	12	346
GO:0006112 energy reserve metabolic process	7	1.34E-06	5.785	0.077	Biological Process	GO:0006112	energy reserve metabolic process	1.34E-06	6.03E-06	0	0	7	91
GO:0099055 integral component of postsynaptic membrane	8	6.29E-07	6.557	0.064	Cellular Component	GO:0099055	integral component of postsynaptic membrane	6.29E-07	6.09E-06	0	0	8	125
GO:0006836 neurotransmitter transport	11	1.37E-06	9.091	0.038	Biological Process	GO:0006836	neurotransmitter transport	1.37E-06	6.13E-06	0	0	11	286
GO:0043009 chordate embryonic development	16	1.39E-06	13.223	0.025	Biological Process	GO:0043009	chordate embryonic development	1.39E-06	6.22E-06	0	0	16	632
GO:0042326 negative regulation of phosphorylation	14	1.39E-06	11.57	0.029	Biological Process	GO:0042326	negative regulation of phosphorylation	1.39E-06	6.24E-06	0	0	14	483
GO:0043901 negative regulation of multi-organism process	10	1.46E-06	8.264	0.043	Biological Process	GO:0043901	negative regulation of multi-organism process	1.46E-06	6.55E-06	0	0	10	231
GO:0009057 macromolecule catabolic process	26	1.48E-06	21.488	0.017	Biological Process	GO:0009057	macromolecule catabolic process	1.48E-06	6.61E-06	0	0	26	1543
GO:0045927 positive regulation of growth	11	1.51E-06	9.091	0.038	Biological Process	GO:0045927	positive regulation of growth	1.51E-06	6.76E-06	0	0	11	289
GO:0015844 monoamine transport	7	1.55E-06	5.785	0.075	Biological Process	GO:0015844	monoamine transport	1.55E-06	6.94E-06	0	0	7	93
GO:1901184 regulation of ERBB signaling pathway	7	1.55E-06	5.785	0.075	Biological Process	GO:1901184	regulation of ERBB signaling pathway	1.55E-06	6.94E-06	0	0	7	93
GO:0045923 positive regulation of fatty acid metabolic process	5	1.56E-06	4.132	0.152	Biological Process	GO:0045923	positive regulation of fatty acid metabolic process	1.56E-06	6.96E-06	0	0	5	33
GO:1901186 positive regulation of ERBB signaling pathway	5	1.56E-06	4.132	0.152	Biological Process	GO:1901186	positive regulation of ERBB signaling pathway	1.56E-06	6.96E-06	0	0	5	33
GO:0099240 intrinsic component of synaptic membrane	9	7.79E-07	7.377	0.051	Cellular Component	GO:0099240	intrinsic component of synaptic membrane	7.79E-07	7.39E-06	0	0	9	175
GO:0010885 regulation of cholesterol storage	4	1.67E-06	3.306	0.267	Biological Process	GO:0010885	regulation of cholesterol storage	1.67E-06	7.41E-06	0	0	4	15
GO:1903350 response to dopamine	4	1.67E-06	3.306	0.267	Biological Process	GO:1903350	response to dopamine	1.67E-06	7.41E-06	0	0	4	15
GO:0010518 positive regulation of phospholipase activity	6	1.68E-06	4.959	0.1	Biological Process	GO:0010518	positive regulation of phospholipase activity	1.68E-06	7.46E-06	0	0	6	60
GO:0002576 platelet degranulation	8	1.68E-06	6.612	0.059	Biological Process	GO:0002576	platelet degranulation	1.68E-06	7.48E-06	0	0	8	135
GO:0098590 plasma membrane region	23	8.98E-07	18.852	0.018	Cellular Component	GO:0098590	plasma membrane region	8.98E-07	8.05E-06	0	0	23	1278
GO:0098936 intrinsic component of postsynaptic membrane	8	8.99E-07	6.557	0.061	Cellular Component	GO:0098936	intrinsic component of postsynaptic membrane	8.99E-07	8.05E-06	0	0	8	131
GO:0070062 extracellular exosome	33	8.99E-07	27.049	0.014	Cellular Component	GO:0070062	extracellular exosome	8.99E-07	8.05E-06	0	0	33	2368
GO:0045907 positive regulation of vasoconstriction	5	1.82E-06	4.132	0.147	Biological Process	GO:0045907	positive regulation of vasoconstriction	1.82E-06	8.08E-06	0	0	5	34
GO:0019900 kinase binding	18	6.39E-07	14.754	0.024	Molecular Function	GO:0019900	kinase binding	6.39E-07	8.26E-06	0	0	18	754
GO:0090575 RNA polymerase II transcription factor complex	9	9.41E-07	7.377	0.05	Cellular Component	GO:0090575	RNA polymerase II transcription factor complex	9.41E-07	8.28E-06	0	0	9	179
GO:0032355 response to estradiol	8	1.88E-06	6.612	0.058	Biological Process	GO:0032355	response to estradiol	1.88E-06	8.34E-06	0	0	8	137
GO:0006476 protein deacetylation	7	1.93E-06	5.785	0.073	Biological Process	GO:0006476	protein deacetylation	1.93E-06	8.53E-06	0	0	7	96
GO:0048010 vascular endothelial growth factor receptor signaling pathway	7	1.93E-06	5.785	0.073	Biological Process	GO:0048010	vascular endothelial growth factor receptor signaling pathway	1.93E-06	8.53E-06	0	0	7	96
GO:0002764 immune response-regulating signaling pathway	19	1.98E-06	15.702	0.021	Biological Process	GO:0002764	immune response-regulating signaling pathway	1.98E-06	8.76E-06	0	0	19	900
GO:0009615 response to virus	12	2.04E-06	9.917	0.033	Biological Process	GO:0009615	response to virus	2.04E-06	9.01E-06	0	0	12	361
GO:1901215 negative regulation of neuron death	10	2.06E-06	8.264	0.042	Biological Process	GO:1901215	negative regulation of neuron death	2.06E-06	9.11E-06	0	0	10	240
GO:0033273 response to vitamin	7	2.07E-06	5.785	0.072	Biological Process	GO:0033273	response to vitamin	2.07E-06	9.12E-06	0	0	7	97
GO:0009792 embryo development ending in birth or egg hatching	16	2.07E-06	13.223	0.025	Biological Process	GO:0009792	embryo development ending in birth or egg hatching	2.07E-06	9.15E-06	0	0	16	652
GO:1901361 organic cyclic compound catabolic process	18	2.09E-06	14.876	0.022	Biological Process	GO:1901361	organic cyclic compound catabolic process	2.09E-06	9.22E-06	0	0	18	817
GO:0070873 regulation of glycogen metabolic process	5	2.11E-06	4.132	0.143	Biological Process	GO:0070873	regulation of glycogen metabolic process	2.11E-06	9.31E-06	0	0	5	35
GO:0014805 smooth muscle adaptation	3	2.15E-06	2.479	0.6	Biological Process	GO:0014805	smooth muscle adaptation	2.15E-06	9.47E-06	0	0	3	5
GO:0038033 positive regulation of endothelial cell chemotaxis by VEGF-activated vascular endothelial growth factor receptor signaling pathway	3	2.15E-06	2.479	0.6	Biological Process	GO:0038033	positive regulation of endothelial cell chemotaxis by VEGF-activated vascular endothelial growth factor receptor signaling pathway	2.15E-06	9.47E-06	0	0	3	5
GO:0009987 cellular process	121	2.19E-06	100	0.007	Biological Process	GO:0009987	cellular process	2.19E-06	9.61E-06	0	0	121	17928
GO:0071466 cellular response to xenobiotic stimulus	9	2.20E-06	7.438	0.048	Biological Process	GO:0071466	cellular response to xenobiotic stimulus	2.20E-06	9.64E-06	0	0	9	188
GO:0035305 negative regulation of dephosphorylation	8	2.21E-06	6.612	0.057	Biological Process	GO:0035305	negative regulation of dephosphorylation	2.21E-06	9.71E-06	0	0	8	140
GO:1903561 extracellular vesicle	33	1.14E-06	27.049	0.014	Cellular Component	GO:1903561	extracellular vesicle	1.14E-06	9.84E-06	0	0	33	2393
GO:0010676 positive regulation of cellular carbohydrate metabolic process	6	2.24E-06	4.959	0.095	Biological Process	GO:0010676	positive regulation of cellular carbohydrate metabolic process	2.24E-06	9.84E-06	0	0	6	63
GO:0043230 extracellular organelle	33	1.16E-06	27.049	0.014	Cellular Component	GO:0043230	extracellular organelle	1.16E-06	9.85E-06	0	0	33	2395
GO:0044424 intracellular part	112	1.23E-06	91.803	0.007	Cellular Component	GO:0044424	intracellular part	1.23E-06	1.03E-05	0	0	112	15877
GO:0042098 T cell proliferation	10	2.39E-06	8.264	0.041	Biological Process	GO:0042098	T cell proliferation	2.39E-06	1.05E-05	0	0	10	244
GO:0043603 cellular amide metabolic process	23	2.45E-06	19.008	0.018	Biological Process	GO:0043603	cellular amide metabolic process	2.45E-06	1.07E-05	0	0	23	1285
GO:0010675 regulation of cellular carbohydrate metabolic process	8	2.46E-06	6.612	0.056	Biological Process	GO:0010675	regulation of cellular carbohydrate metabolic process	2.46E-06	1.08E-05	0	0	8	142
GO:0046626 regulation of insulin receptor signaling pathway	6	2.46E-06	4.959	0.094	Biological Process	GO:0046626	regulation of insulin receptor signaling pathway	2.46E-06	1.08E-05	0	0	6	64
GO:0007160 cell-matrix adhesion	10	2.48E-06	8.264	0.041	Biological Process	GO:0007160	cell-matrix adhesion	2.48E-06	1.08E-05	0	0	10	245
GO:0046434 organophosphate catabolic process	10	2.48E-06	8.264	0.041	Biological Process	GO:0046434	organophosphate catabolic process	2.48E-06	1.08E-05	0	0	10	245
GO:0016653 oxidoreductase activity, acting on NAD(P)H, heme protein as acceptor	4	8.69E-07	3.279	0.308	Molecular Function	GO:0016653	oxidoreductase activity, acting on NAD(P)H, heme protein as acceptor	8.69E-07	1.10E-05	0	0	4	13
GO:0034774 secretory granule lumen	12	1.39E-06	9.836	0.033	Cellular Component	GO:0034774	secretory granule lumen	1.39E-06	1.13E-05	0	0	12	367
GO:0044446 intracellular organelle part	85	1.41E-06	69.672	0.008	Cellular Component	GO:0044446	intracellular organelle part	1.41E-06	1.13E-05	0	0	85	10273
GO:0043933 protein-containing complex subunit organization	34	2.61E-06	28.099	0.014	Biological Process	GO:0043933	protein-containing complex subunit organization	2.61E-06	1.14E-05	0	0	34	2470
GO:0019933 cAMP-mediated signaling	9	2.61E-06	7.438	0.047	Biological Process	GO:0019933	cAMP-mediated signaling	2.61E-06	1.14E-05	0	0	9	192
GO:0007200 phospholipase C-activating G protein-coupled receptor signaling pathway	7	2.71E-06	5.785	0.069	Biological Process	GO:0007200	phospholipase C-activating G protein-coupled receptor signaling pathway	2.71E-06	1.18E-05	0	0	7	101
GO:2001235 positive regulation of apoptotic signaling pathway	9	2.73E-06	7.438	0.047	Biological Process	GO:2001235	positive regulation of apoptotic signaling pathway	2.73E-06	1.19E-05	0	0	9	193
GO:0007189 adenylate cyclase-activating G protein-coupled receptor signaling pathway	8	2.73E-06	6.612	0.056	Biological Process	GO:0007189	adenylate cyclase-activating G protein-coupled receptor signaling pathway	2.73E-06	1.19E-05	0	0	8	144
GO:0010742 macrophage derived foam cell differentiation	5	2.81E-06	4.132	0.135	Biological Process	GO:0010742	macrophage derived foam cell differentiation	2.81E-06	1.22E-05	0	0	5	37
GO:0034405 response to fluid shear stress	5	2.81E-06	4.132	0.135	Biological Process	GO:0034405	response to fluid shear stress	2.81E-06	1.22E-05	0	0	5	37
GO:0042554 superoxide anion generation	5	2.81E-06	4.132	0.135	Biological Process	GO:0042554	superoxide anion generation	2.81E-06	1.22E-05	0	0	5	37
GO:0090077 foam cell differentiation	5	2.81E-06	4.132	0.135	Biological Process	GO:0090077	foam cell differentiation	2.81E-06	1.22E-05	0	0	5	37
GO:0022607 cellular component assembly	41	2.84E-06	33.884	0.012	Biological Process	GO:0022607	cellular component assembly	2.84E-06	1.23E-05	0	0	41	3325
GO:0010878 cholesterol storage	4	2.88E-06	3.306	0.235	Biological Process	GO:0010878	cholesterol storage	2.88E-06	1.24E-05	0	0	4	17
GO:0045725 positive regulation of glycogen biosynthetic process	4	2.88E-06	3.306	0.235	Biological Process	GO:0045725	positive regulation of glycogen biosynthetic process	2.88E-06	1.24E-05	0	0	4	17
GO:0090494 dopamine uptake	4	2.88E-06	3.306	0.235	Biological Process	GO:0090494	dopamine uptake	2.88E-06	1.24E-05	0	0	4	17
GO:0009411 response to UV	8	2.88E-06	6.612	0.055	Biological Process	GO:0009411	response to UV	2.88E-06	1.24E-05	0	0	8	145
GO:1901655 cellular response to ketone	7	2.90E-06	5.785	0.069	Biological Process	GO:1901655	cellular response to ketone	2.90E-06	1.25E-05	0	0	7	102
GO:0001933 negative regulation of protein phosphorylation	13	2.97E-06	10.744	0.029	Biological Process	GO:0001933	negative regulation of protein phosphorylation	2.97E-06	1.28E-05	0	0	13	443
GO:0032787 monocarboxylic acid metabolic process	16	3.00E-06	13.223	0.024	Biological Process	GO:0032787	monocarboxylic acid metabolic process	3.00E-06	1.29E-05	0	0	16	671
GO:0005622 intracellular	112	1.66E-06	91.803	0.007	Cellular Component	GO:0005622	intracellular	1.66E-06	1.31E-05	0	0	112	15933
GO:1901030 positive regulation of mitochondrial outer membrane permeabilization involved in apoptotic signaling pathway	5	3.22E-06	4.132	0.132	Biological Process	GO:1901030	positive regulation of mitochondrial outer membrane permeabilization involved in apoptotic signaling pathway	3.22E-06	1.38E-05	0	0	5	38
GO:1902042 negative regulation of extrinsic apoptotic signaling pathway via death domain receptors	5	3.22E-06	4.132	0.132	Biological Process	GO:1902042	negative regulation of extrinsic apoptotic signaling pathway via death domain receptors	3.22E-06	1.38E-05	0	0	5	38
GO:0031091 platelet alpha granule	7	1.78E-06	5.738	0.07	Cellular Component	GO:0031091	platelet alpha granule	1.78E-06	1.39E-05	0	0	7	100
GO:0048667 cell morphogenesis involved in neuron differentiation	15	3.40E-06	12.397	0.025	Biological Process	GO:0048667	cell morphogenesis involved in neuron differentiation	3.40E-06	1.46E-05	0	0	15	598
GO:0044433 cytoplasmic vesicle part	27	1.94E-06	22.131	0.015	Cellular Component	GO:0044433	cytoplasmic vesicle part	1.94E-06	1.49E-05	0	0	27	1761
GO:0010921 regulation of phosphatase activity	9	3.50E-06	7.438	0.045	Biological Process	GO:0010921	regulation of phosphatase activity	3.50E-06	1.50E-05	0	0	9	199
GO:0008203 cholesterol metabolic process	8	3.53E-06	6.612	0.054	Biological Process	GO:0008203	cholesterol metabolic process	3.53E-06	1.51E-05	0	0	8	149
GO:0051785 positive regulation of nuclear division	6	3.53E-06	4.959	0.088	Biological Process	GO:0051785	positive regulation of nuclear division	3.53E-06	1.51E-05	0	0	6	68
GO:0042165 neurotransmitter binding	6	1.21E-06	4.918	0.105	Molecular Function	GO:0042165	neurotransmitter binding	1.21E-06	1.51E-05	0	0	6	57
GO:0031293 membrane protein intracellular domain proteolysis	4	3.68E-06	3.306	0.222	Biological Process	GO:0031293	membrane protein intracellular domain proteolysis	3.68E-06	1.57E-05	0	0	4	18
GO:0070875 positive regulation of glycogen metabolic process	4	3.68E-06	3.306	0.222	Biological Process	GO:0070875	positive regulation of glycogen metabolic process	3.68E-06	1.57E-05	0	0	4	18
GO:0090493 catecholamine uptake	4	3.68E-06	3.306	0.222	Biological Process	GO:0090493	catecholamine uptake	3.68E-06	1.57E-05	0	0	4	18
GO:0035601 protein deacylation	7	3.75E-06	5.785	0.066	Biological Process	GO:0035601	protein deacylation	3.75E-06	1.60E-05	0	0	7	106
GO:0048167 regulation of synaptic plasticity	9	3.80E-06	7.438	0.045	Biological Process	GO:0048167	regulation of synaptic plasticity	3.80E-06	1.62E-05	0	0	9	201
GO:0030163 protein catabolic process	20	3.84E-06	16.529	0.019	Biological Process	GO:0030163	protein catabolic process	3.84E-06	1.64E-05	0	0	20	1033
GO:0016772 transferase activity, transferring phosphorus-containing groups	21	1.39E-06	17.213	0.02	Molecular Function	GO:0016772	transferase activity, transferring phosphorus-containing groups	1.39E-06	1.70E-05	0	0	21	1059
GO:0051281 positive regulation of release of sequestered calcium ion into cytosol	5	4.18E-06	4.132	0.125	Biological Process	GO:0051281	positive regulation of release of sequestered calcium ion into cytosol	4.18E-06	1.78E-05	0	0	5	40
GO:0051701 interaction with host	10	4.21E-06	8.264	0.038	Biological Process	GO:0051701	interaction with host	4.21E-06	1.79E-05	0	0	10	260
GO:0016311 dephosphorylation	14	4.46E-06	11.57	0.026	Biological Process	GO:0016311	dephosphorylation	4.46E-06	1.90E-05	0	0	14	534
GO:0033692 cellular polysaccharide biosynthetic process	6	4.55E-06	4.959	0.085	Biological Process	GO:0033692	cellular polysaccharide biosynthetic process	4.55E-06	1.93E-05	0	0	6	71
GO:0035924 cellular response to vascular endothelial growth factor stimulus	6	4.55E-06	4.959	0.085	Biological Process	GO:0035924	cellular response to vascular endothelial growth factor stimulus	4.55E-06	1.93E-05	0	0	6	71
GO:1900076 regulation of cellular response to insulin stimulus	6	4.55E-06	4.959	0.085	Biological Process	GO:1900076	regulation of cellular response to insulin stimulus	4.55E-06	1.93E-05	0	0	6	71
GO:1904427 positive regulation of calcium ion transmembrane transport	6	4.55E-06	4.959	0.085	Biological Process	GO:1904427	positive regulation of calcium ion transmembrane transport	4.55E-06	1.93E-05	0	0	6	71
GO:0032930 positive regulation of superoxide anion generation	4	4.64E-06	3.306	0.211	Biological Process	GO:0032930	positive regulation of superoxide anion generation	4.64E-06	1.96E-05	0	0	4	19
GO:1903798 regulation of production of miRNAs involved in gene silencing by miRNA	4	4.64E-06	3.306	0.211	Biological Process	GO:1903798	regulation of production of miRNAs involved in gene silencing by miRNA	4.64E-06	1.96E-05	0	0	4	19
GO:0035265 organ growth	9	4.65E-06	7.438	0.044	Biological Process	GO:0035265	organ growth	4.65E-06	1.96E-05	0	0	9	206
GO:0035240 dopamine binding	4	1.64E-06	3.279	0.267	Molecular Function	GO:0035240	dopamine binding	1.64E-06	1.98E-05	0	0	4	15
GO:0007420 brain development	17	4.70E-06	14.05	0.022	Biological Process	GO:0007420	brain development	4.70E-06	1.98E-05	0	0	17	779
GO:0060969 negative regulation of gene silencing	5	4.74E-06	4.132	0.122	Biological Process	GO:0060969	negative regulation of gene silencing	4.74E-06	2.00E-05	0	0	5	41
GO:0140096 catalytic activity, acting on a protein	34	1.70E-06	27.869	0.014	Molecular Function	GO:0140096	catalytic activity, acting on a protein	1.70E-06	2.01E-05	0	0	34	2430
GO:0005178 integrin binding	8	1.74E-06	6.557	0.059	Molecular Function	GO:0005178	integrin binding	1.74E-06	2.02E-05	0	0	8	136
GO:0042698 ovulation cycle	6	4.94E-06	4.959	0.083	Biological Process	GO:0042698	ovulation cycle	4.94E-06	2.08E-05	0	0	6	72
GO:0019439 aromatic compound catabolic process	17	4.94E-06	14.05	0.022	Biological Process	GO:0019439	aromatic compound catabolic process	4.94E-06	2.08E-05	0	0	17	782
GO:0046467 membrane lipid biosynthetic process	8	4.96E-06	6.612	0.051	Biological Process	GO:0046467	membrane lipid biosynthetic process	4.96E-06	2.09E-05	0	0	8	156
GO:0016485 protein processing	12	5.00E-06	9.917	0.03	Biological Process	GO:0016485	protein processing	5.00E-06	2.11E-05	0	0	12	394
GO:0046822 regulation of nucleocytoplasmic transport	7	5.10E-06	5.785	0.063	Biological Process	GO:0046822	regulation of nucleocytoplasmic transport	5.10E-06	2.14E-05	0	0	7	111
GO:1900371 regulation of purine nucleotide biosynthetic process	7	5.10E-06	5.785	0.063	Biological Process	GO:1900371	regulation of purine nucleotide biosynthetic process	5.10E-06	2.14E-05	0	0	7	111
GO:0019199 transmembrane receptor protein kinase activity	7	1.89E-06	5.738	0.073	Molecular Function	GO:0019199	transmembrane receptor protein kinase activity	1.89E-06	2.16E-05	0	0	7	96
GO:0034767 positive regulation of ion transmembrane transport	8	5.20E-06	6.612	0.051	Biological Process	GO:0034767	positive regulation of ion transmembrane transport	5.20E-06	2.18E-05	0	0	8	157
GO:0045202 synapse	22	2.93E-06	18.033	0.017	Cellular Component	GO:0045202	synapse	2.93E-06	2.19E-05	0	0	22	1268
GO:0031974 membrane-enclosed lumen	57	3.06E-06	46.721	0.01	Cellular Component	GO:0031974	membrane-enclosed lumen	3.06E-06	2.19E-05	0	0	57	5783
GO:0043233 organelle lumen	57	3.06E-06	46.721	0.01	Cellular Component	GO:0043233	organelle lumen	3.06E-06	2.19E-05	0	0	57	5783
GO:0070013 intracellular organelle lumen	57	3.06E-06	46.721	0.01	Cellular Component	GO:0070013	intracellular organelle lumen	3.06E-06	2.19E-05	0	0	57	5783
GO:0031093 platelet alpha granule lumen	6	3.07E-06	4.918	0.086	Cellular Component	GO:0031093	platelet alpha granule lumen	3.07E-06	2.19E-05	0	0	6	70
GO:0005764 lysosome	17	3.12E-06	13.934	0.021	Cellular Component	GO:0005764	lysosome	3.12E-06	2.19E-05	0	0	17	797
GO:0032990 cell part morphogenesis	16	5.23E-06	13.223	0.023	Biological Process	GO:0032990	cell part morphogenesis	5.23E-06	2.19E-05	0	0	16	701
GO:0000323 lytic vacuole	17	3.22E-06	13.934	0.021	Cellular Component	GO:0000323	lytic vacuole	3.22E-06	2.23E-05	0	0	17	799
GO:0030810 positive regulation of nucleotide biosynthetic process	5	5.36E-06	4.132	0.119	Biological Process	GO:0030810	positive regulation of nucleotide biosynthetic process	5.36E-06	2.24E-05	0	0	5	42
GO:0045124 regulation of bone resorption	5	5.36E-06	4.132	0.119	Biological Process	GO:0045124	regulation of bone resorption	5.36E-06	2.24E-05	0	0	5	42
GO:1900373 positive regulation of purine nucleotide biosynthetic process	5	5.36E-06	4.132	0.119	Biological Process	GO:1900373	positive regulation of purine nucleotide biosynthetic process	5.36E-06	2.24E-05	0	0	5	42
GO:2000273 positive regulation of signaling receptor activity	5	5.36E-06	4.132	0.119	Biological Process	GO:2000273	positive regulation of signaling receptor activity	5.36E-06	2.24E-05	0	0	5	42
GO:0030808 regulation of nucleotide biosynthetic process	7	5.41E-06	5.785	0.062	Biological Process	GO:0030808	regulation of nucleotide biosynthetic process	5.41E-06	2.26E-05	0	0	7	112
GO:0007187 G protein-coupled receptor signaling pathway, coupled to cyclic nucleotide second messenger	10	5.51E-06	8.264	0.037	Biological Process	GO:0007187	G protein-coupled receptor signaling pathway, coupled to cyclic nucleotide second messenger	5.51E-06	2.30E-05	0	0	10	268
GO:0043586 tongue development	4	5.77E-06	3.306	0.2	Biological Process	GO:0043586	tongue development	5.77E-06	2.41E-05	0	0	4	20
GO:0060965 negative regulation of gene silencing by miRNA	4	5.77E-06	3.306	0.2	Biological Process	GO:0060965	negative regulation of gene silencing by miRNA	5.77E-06	2.41E-05	0	0	4	20
GO:0051249 regulation of lymphocyte activation	15	5.92E-06	12.397	0.024	Biological Process	GO:0051249	regulation of lymphocyte activation	5.92E-06	2.46E-05	0	0	15	626
GO:0120036 plasma membrane bounded cell projection organization	25	6.04E-06	20.661	0.016	Biological Process	GO:0120036	plasma membrane bounded cell projection organization	6.04E-06	2.51E-05	0	0	25	1561
GO:0042180 cellular ketone metabolic process	10	6.07E-06	8.264	0.037	Biological Process	GO:0042180	cellular ketone metabolic process	6.07E-06	2.53E-05	0	0	10	271
GO:1903036 positive regulation of response to wounding	6	6.27E-06	4.959	0.08	Biological Process	GO:1903036	positive regulation of response to wounding	6.27E-06	2.61E-05	0	0	6	75
GO:0000902 cell morphogenesis	20	6.32E-06	16.529	0.019	Biological Process	GO:0000902	cell morphogenesis	6.32E-06	2.62E-05	0	0	20	1068
GO:0098693 regulation of synaptic vesicle cycle	7	6.44E-06	5.785	0.061	Biological Process	GO:0098693	regulation of synaptic vesicle cycle	6.44E-06	2.67E-05	0	0	7	115
GO:0031668 cellular response to extracellular stimulus	10	6.69E-06	8.264	0.036	Biological Process	GO:0031668	cellular response to extracellular stimulus	6.69E-06	2.77E-05	0	0	10	274
GO:0010828 positive regulation of glucose transmembrane transport	5	6.77E-06	4.132	0.114	Biological Process	GO:0010828	positive regulation of glucose transmembrane transport	6.77E-06	2.80E-05	0	0	5	44
GO:1903524 positive regulation of blood circulation	6	6.77E-06	4.959	0.079	Biological Process	GO:1903524	positive regulation of blood circulation	6.77E-06	2.80E-05	0	0	6	76
GO:0001503 ossification	12	6.78E-06	9.917	0.03	Biological Process	GO:0001503	ossification	6.78E-06	2.81E-05	0	0	12	406
GO:0007049 cell cycle	29	6.88E-06	23.967	0.014	Biological Process	GO:0007049	cell cycle	6.88E-06	2.84E-05	0	0	29	2005
GO:0055037 recycling endosome	9	4.26E-06	7.377	0.042	Cellular Component	GO:0055037	recycling endosome	4.26E-06	2.91E-05	0	0	9	215
GO:0014821 phasic smooth muscle contraction	4	7.10E-06	3.306	0.19	Biological Process	GO:0014821	phasic smooth muscle contraction	7.10E-06	2.93E-05	0	0	4	21
GO:0019637 organophosphate metabolic process	22	7.10E-06	18.182	0.017	Biological Process	GO:0019637	organophosphate metabolic process	7.10E-06	2.93E-05	0	0	22	1270
GO:0098732 macromolecule deacylation	7	7.22E-06	5.785	0.06	Biological Process	GO:0098732	macromolecule deacylation	7.22E-06	2.98E-05	0	0	7	117
GO:0061045 negative regulation of wound healing	6	7.31E-06	4.959	0.078	Biological Process	GO:0061045	negative regulation of wound healing	7.31E-06	3.01E-05	0	0	6	77
GO:0021537 telencephalon development	10	7.36E-06	8.264	0.036	Biological Process	GO:0021537	telencephalon development	7.36E-06	3.03E-05	0	0	10	277
GO:0034504 protein localization to nucleus	10	7.36E-06	8.264	0.036	Biological Process	GO:0034504	protein localization to nucleus	7.36E-06	3.03E-05	0	0	10	277
GO:0032989 cellular component morphogenesis	21	7.37E-06	17.355	0.018	Biological Process	GO:0032989	cellular component morphogenesis	7.37E-06	3.03E-05	0	0	21	1175
GO:0032287 peripheral nervous system myelin maintenance	3	7.47E-06	2.479	0.429	Biological Process	GO:0032287	peripheral nervous system myelin maintenance	7.47E-06	3.07E-05	0	0	3	7
GO:0038089 positive regulation of cell migration by vascular endothelial growth factor signaling pathway	3	7.47E-06	2.479	0.429	Biological Process	GO:0038089	positive regulation of cell migration by vascular endothelial growth factor signaling pathway	7.47E-06	3.07E-05	0	0	3	7
GO:0001504 neurotransmitter uptake	5	7.58E-06	4.132	0.111	Biological Process	GO:0001504	neurotransmitter uptake	7.58E-06	3.11E-05	0	0	5	45
GO:0032965 regulation of collagen biosynthetic process	5	7.58E-06	4.132	0.111	Biological Process	GO:0032965	regulation of collagen biosynthetic process	7.58E-06	3.11E-05	0	0	5	45
GO:0050778 positive regulation of immune response	21	7.87E-06	17.355	0.018	Biological Process	GO:0050778	positive regulation of immune response	7.87E-06	3.22E-05	0	0	21	1180
GO:0005977 glycogen metabolic process	6	7.88E-06	4.959	0.077	Biological Process	GO:0005977	glycogen metabolic process	7.88E-06	3.23E-05	0	0	6	78
GO:0032388 positive regulation of intracellular transport	9	7.91E-06	7.438	0.041	Biological Process	GO:0032388	positive regulation of intracellular transport	7.91E-06	3.24E-05	0	0	9	220
GO:0015849 organic acid transport	11	8.01E-06	9.091	0.032	Biological Process	GO:0015849	organic acid transport	8.01E-06	3.27E-05	0	0	11	344
GO:0046942 carboxylic acid transport	11	8.01E-06	9.091	0.032	Biological Process	GO:0046942	carboxylic acid transport	8.01E-06	3.27E-05	0	0	11	344
GO:0006996 organelle organization	46	8.05E-06	38.017	0.011	Biological Process	GO:0006996	organelle organization	8.05E-06	3.28E-05	0	0	46	4116
GO:0015696 ammonium transport	7	8.07E-06	5.785	0.059	Biological Process	GO:0015696	ammonium transport	8.07E-06	3.29E-05	0	0	7	119
GO:0019901 protein kinase binding	16	3.00E-06	13.115	0.024	Molecular Function	GO:0019901	protein kinase binding	3.00E-06	3.37E-05	0	0	16	673
GO:0044425 membrane part	73	5.03E-06	59.836	0.009	Cellular Component	GO:0044425	membrane part	5.03E-06	3.38E-05	0	0	73	8427
GO:0044463 cell projection part	24	5.17E-06	19.672	0.016	Cellular Component	GO:0044463	cell projection part	5.17E-06	3.38E-05	0	0	24	1524
GO:0120038 plasma membrane bounded cell projection part	24	5.17E-06	19.672	0.016	Cellular Component	GO:0120038	plasma membrane bounded cell projection part	5.17E-06	3.38E-05	0	0	24	1524
GO:0006073 cellular glucan metabolic process	6	8.49E-06	4.959	0.076	Biological Process	GO:0006073	cellular glucan metabolic process	8.49E-06	3.45E-05	0	0	6	79
GO:0044042 glucan metabolic process	6	8.49E-06	4.959	0.076	Biological Process	GO:0044042	glucan metabolic process	8.49E-06	3.45E-05	0	0	6	79
GO:2000300 regulation of synaptic vesicle exocytosis	6	8.49E-06	4.959	0.076	Biological Process	GO:2000300	regulation of synaptic vesicle exocytosis	8.49E-06	3.45E-05	0	0	6	79
GO:0019935 cyclic-nucleotide-mediated signaling	9	8.51E-06	7.438	0.041	Biological Process	GO:0019935	cyclic-nucleotide-mediated signaling	8.51E-06	3.46E-05	0	0	9	222
GO:0046827 positive regulation of protein export from nucleus	4	8.64E-06	3.306	0.182	Biological Process	GO:0046827	positive regulation of protein export from nucleus	8.64E-06	3.51E-05	0	0	4	22
GO:0030374 nuclear receptor transcription coactivator activity	6	3.17E-06	4.918	0.09	Molecular Function	GO:0030374	nuclear receptor transcription coactivator activity	3.17E-06	3.51E-05	0	0	6	67
GO:0044798 nuclear transcription factor complex	9	5.53E-06	7.377	0.041	Cellular Component	GO:0044798	nuclear transcription factor complex	5.53E-06	3.57E-05	0	0	9	222
GO:0031016 pancreas development	6	9.13E-06	4.959	0.075	Biological Process	GO:0031016	pancreas development	9.13E-06	3.71E-05	0	0	6	80
GO:0030030 cell projection organization	25	9.17E-06	20.661	0.016	Biological Process	GO:0030030	cell projection organization	9.17E-06	3.72E-05	0	0	25	1599
GO:0002263 cell activation involved in immune response	17	9.21E-06	14.05	0.021	Biological Process	GO:0002263	cell activation involved in immune response	9.21E-06	3.73E-05	0	0	17	820
GO:0022602 ovulation cycle process	5	9.43E-06	4.132	0.106	Biological Process	GO:0022602	ovulation cycle process	9.43E-06	3.81E-05	0	0	5	47
GO:0045776 negative regulation of blood pressure	5	9.43E-06	4.132	0.106	Biological Process	GO:0045776	negative regulation of blood pressure	9.43E-06	3.81E-05	0	0	5	47
GO:0046872 metal ion binding	50	3.69E-06	40.984	0.011	Molecular Function	GO:0046872	metal ion binding	3.69E-06	4.01E-05	0	0	50	4548
GO:0032963 collagen metabolic process	7	1.00E-05	5.785	0.057	Biological Process	GO:0032963	collagen metabolic process	1.00E-05	4.06E-05	0	0	7	123
GO:0044422 organelle part	85	6.39E-06	69.672	0.008	Cellular Component	GO:0044422	organelle part	6.39E-06	4.07E-05	0	0	85	10583
GO:0016125 sterol metabolic process	8	1.02E-05	6.612	0.047	Biological Process	GO:0016125	sterol metabolic process	1.02E-05	4.11E-05	0	0	8	172
GO:0015711 organic anion transport	13	1.03E-05	10.744	0.026	Biological Process	GO:0015711	organic anion transport	1.03E-05	4.14E-05	0	0	13	497
GO:0098794 postsynapse	15	6.65E-06	12.295	0.022	Cellular Component	GO:0098794	postsynapse	6.65E-06	4.18E-05	0	0	15	667
GO:0050996 positive regulation of lipid catabolic process	4	1.04E-05	3.306	0.174	Biological Process	GO:0050996	positive regulation of lipid catabolic process	1.04E-05	4.20E-05	0	0	4	23
GO:0098810 neurotransmitter reuptake	4	1.04E-05	3.306	0.174	Biological Process	GO:0098810	neurotransmitter reuptake	1.04E-05	4.20E-05	0	0	4	23
GO:0007618 mating	5	1.05E-05	4.132	0.104	Biological Process	GO:0007618	mating	1.05E-05	4.21E-05	0	0	5	48
GO:0032369 negative regulation of lipid transport	5	1.05E-05	4.132	0.104	Biological Process	GO:0032369	negative regulation of lipid transport	1.05E-05	4.21E-05	0	0	5	48
GO:0032570 response to progesterone	5	1.05E-05	4.132	0.104	Biological Process	GO:0032570	response to progesterone	1.05E-05	4.21E-05	0	0	5	48
GO:0043124 negative regulation of I-kappaB kinase/NF-kappaB signaling	5	1.05E-05	4.132	0.104	Biological Process	GO:0043124	negative regulation of I-kappaB kinase/NF-kappaB signaling	1.05E-05	4.21E-05	0	0	5	48
GO:0060443 mammary gland morphogenesis	5	1.05E-05	4.132	0.104	Biological Process	GO:0060443	mammary gland morphogenesis	1.05E-05	4.21E-05	0	0	5	48
GO:1905954 positive regulation of lipid localization	6	1.05E-05	4.959	0.073	Biological Process	GO:1905954	positive regulation of lipid localization	1.05E-05	4.23E-05	0	0	6	82
GO:0003958 NADPH-hemoprotein reductase activity	3	4.25E-06	2.459	0.5	Molecular Function	GO:0003958	NADPH-hemoprotein reductase activity	4.25E-06	4.55E-05	0	0	3	6
GO:0048538 thymus development	5	1.16E-05	4.132	0.102	Biological Process	GO:0048538	thymus development	1.16E-05	4.65E-05	0	0	5	49
GO:0050920 regulation of chemotaxis	9	1.17E-05	7.438	0.039	Biological Process	GO:0050920	regulation of chemotaxis	1.17E-05	4.69E-05	0	0	9	231
GO:0002246 wound healing involved in inflammatory response	3	1.19E-05	2.479	0.375	Biological Process	GO:0002246	wound healing involved in inflammatory response	1.19E-05	4.76E-05	0	0	3	8
GO:0010887 negative regulation of cholesterol storage	3	1.19E-05	2.479	0.375	Biological Process	GO:0010887	negative regulation of cholesterol storage	1.19E-05	4.76E-05	0	0	3	8
GO:0048812 neuron projection morphogenesis	15	1.24E-05	12.397	0.023	Biological Process	GO:0048812	neuron projection morphogenesis	1.24E-05	4.94E-05	0	0	15	666
GO:0038093 Fc receptor signaling pathway	10	1.24E-05	8.264	0.034	Biological Process	GO:0038093	Fc receptor signaling pathway	1.24E-05	4.94E-05	0	0	10	294
GO:0006805 xenobiotic metabolic process	7	1.24E-05	5.785	0.055	Biological Process	GO:0006805	xenobiotic metabolic process	1.24E-05	4.94E-05	0	0	7	127
GO:0007617 mating behavior	4	1.24E-05	3.306	0.167	Biological Process	GO:0007617	mating behavior	1.24E-05	4.96E-05	0	0	4	24
GO:0032928 regulation of superoxide anion generation	4	1.24E-05	3.306	0.167	Biological Process	GO:0032928	regulation of superoxide anion generation	1.24E-05	4.96E-05	0	0	4	24
GO:0007188 adenylate cyclase-modulating G protein-coupled receptor signaling pathway	9	1.25E-05	7.438	0.039	Biological Process	GO:0007188	adenylate cyclase-modulating G protein-coupled receptor signaling pathway	1.25E-05	5.00E-05	0	0	9	233
GO:0010712 regulation of collagen metabolic process	5	1.28E-05	4.132	0.1	Biological Process	GO:0010712	regulation of collagen metabolic process	1.28E-05	5.10E-05	0	0	5	50
GO:0035272 exocrine system development	5	1.28E-05	4.132	0.1	Biological Process	GO:0035272	exocrine system development	1.28E-05	5.10E-05	0	0	5	50
GO:0046850 regulation of bone remodeling	5	1.28E-05	4.132	0.1	Biological Process	GO:0046850	regulation of bone remodeling	1.28E-05	5.10E-05	0	0	5	50
GO:0010822 positive regulation of mitochondrion organization	7	1.30E-05	5.785	0.055	Biological Process	GO:0010822	positive regulation of mitochondrion organization	1.30E-05	5.17E-05	0	0	7	128
GO:2001242 regulation of intrinsic apoptotic signaling pathway	8	1.30E-05	6.612	0.045	Biological Process	GO:2001242	regulation of intrinsic apoptotic signaling pathway	1.30E-05	5.18E-05	0	0	8	178
GO:0001701 in utero embryonic development	11	1.33E-05	9.091	0.03	Biological Process	GO:0001701	in utero embryonic development	1.33E-05	5.26E-05	0	0	11	363
GO:0000904 cell morphogenesis involved in differentiation	16	1.34E-05	13.223	0.021	Biological Process	GO:0000904	cell morphogenesis involved in differentiation	1.34E-05	5.32E-05	0	0	16	756
GO:0050728 negative regulation of inflammatory response	8	1.36E-05	6.612	0.045	Biological Process	GO:0050728	negative regulation of inflammatory response	1.36E-05	5.38E-05	0	0	8	179
GO:0098978 glutamatergic synapse	11	8.68E-06	9.016	0.03	Cellular Component	GO:0098978	glutamatergic synapse	8.68E-06	5.38E-05	0	0	11	366
GO:0042742 defense response to bacterium	12	1.39E-05	9.917	0.028	Biological Process	GO:0042742	defense response to bacterium	1.39E-05	5.48E-05	0	0	12	436
GO:0015980 energy derivation by oxidation of organic compounds	10	1.39E-05	8.264	0.034	Biological Process	GO:0015980	energy derivation by oxidation of organic compounds	1.39E-05	5.50E-05	0	0	10	298
GO:0031589 cell-substrate adhesion	11	1.40E-05	9.091	0.03	Biological Process	GO:0031589	cell-substrate adhesion	1.40E-05	5.51E-05	0	0	11	365
GO:0031050 dsRNA processing	5	1.42E-05	4.132	0.098	Biological Process	GO:0031050	dsRNA processing	1.42E-05	5.58E-05	0	0	5	51
GO:0045981 positive regulation of nucleotide metabolic process	5	1.42E-05	4.132	0.098	Biological Process	GO:0045981	positive regulation of nucleotide metabolic process	1.42E-05	5.58E-05	0	0	5	51
GO:0070918 production of small RNA involved in gene silencing by RNA	5	1.42E-05	4.132	0.098	Biological Process	GO:0070918	production of small RNA involved in gene silencing by RNA	1.42E-05	5.58E-05	0	0	5	51
GO:1900544 positive regulation of purine nucleotide metabolic process	5	1.42E-05	4.132	0.098	Biological Process	GO:1900544	positive regulation of purine nucleotide metabolic process	1.42E-05	5.58E-05	0	0	5	51
GO:0002697 regulation of immune effector process	14	1.43E-05	11.57	0.024	Biological Process	GO:0002697	regulation of immune effector process	1.43E-05	5.64E-05	0	0	14	592
GO:0034763 negative regulation of transmembrane transport	7	1.44E-05	5.785	0.054	Biological Process	GO:0034763	negative regulation of transmembrane transport	1.44E-05	5.67E-05	0	0	7	130
GO:0007507 heart development	14	1.46E-05	11.57	0.024	Biological Process	GO:0007507	heart development	1.46E-05	5.74E-05	0	0	14	593
GO:0006936 muscle contraction	11	1.47E-05	9.091	0.03	Biological Process	GO:0006936	muscle contraction	1.47E-05	5.77E-05	0	0	11	367
GO:0042476 odontogenesis	7	1.52E-05	5.785	0.053	Biological Process	GO:0042476	odontogenesis	1.52E-05	5.95E-05	0	0	7	131
GO:0120039 plasma membrane bounded cell projection morphogenesis	15	1.58E-05	12.397	0.022	Biological Process	GO:0120039	plasma membrane bounded cell projection morphogenesis	1.58E-05	6.19E-05	0	0	15	680
GO:0033157 regulation of intracellular protein transport	9	1.59E-05	7.438	0.037	Biological Process	GO:0033157	regulation of intracellular protein transport	1.59E-05	6.22E-05	0	0	9	240
GO:0051101 regulation of DNA binding	7	1.59E-05	5.785	0.053	Biological Process	GO:0051101	regulation of DNA binding	1.59E-05	6.24E-05	0	0	7	132
GO:0001221 transcription cofactor binding	5	5.94E-06	4.098	0.116	Molecular Function	GO:0001221	transcription cofactor binding	5.94E-06	6.26E-05	0	0	5	43
GO:0048858 cell projection morphogenesis	15	1.63E-05	12.397	0.022	Biological Process	GO:0048858	cell projection morphogenesis	1.63E-05	6.39E-05	0	0	15	682
GO:0046982 protein heterodimerization activity	14	6.17E-06	11.475	0.025	Molecular Function	GO:0046982	protein heterodimerization activity	6.17E-06	6.41E-05	0	0	14	551
GO:0044270 cellular nitrogen compound catabolic process	16	1.66E-05	13.223	0.021	Biological Process	GO:0044270	cellular nitrogen compound catabolic process	1.66E-05	6.48E-05	0	0	16	769
GO:0002253 activation of immune response	18	1.66E-05	14.876	0.019	Biological Process	GO:0002253	activation of immune response	1.66E-05	6.49E-05	0	0	18	950
GO:1900542 regulation of purine nucleotide metabolic process	7	1.67E-05	5.785	0.053	Biological Process	GO:1900542	regulation of purine nucleotide metabolic process	1.67E-05	6.53E-05	0	0	7	133
GO:0097194 execution phase of apoptosis	6	1.69E-05	4.959	0.067	Biological Process	GO:0097194	execution phase of apoptosis	1.69E-05	6.59E-05	0	0	6	89
GO:0031669 cellular response to nutrient levels	9	1.70E-05	7.438	0.037	Biological Process	GO:0031669	cellular response to nutrient levels	1.70E-05	6.61E-05	0	0	9	242
GO:0006584 catecholamine metabolic process	5	1.71E-05	4.132	0.094	Biological Process	GO:0006584	catecholamine metabolic process	1.71E-05	6.66E-05	0	0	5	53
GO:0009712 catechol-containing compound metabolic process	5	1.71E-05	4.132	0.094	Biological Process	GO:0009712	catechol-containing compound metabolic process	1.71E-05	6.66E-05	0	0	5	53
GO:0030195 negative regulation of blood coagulation	5	1.71E-05	4.132	0.094	Biological Process	GO:0030195	negative regulation of blood coagulation	1.71E-05	6.66E-05	0	0	5	53
GO:1901028 regulation of mitochondrial outer membrane permeabilization involved in apoptotic signaling pathway	5	1.71E-05	4.132	0.094	Biological Process	GO:1901028	regulation of mitochondrial outer membrane permeabilization involved in apoptotic signaling pathway	1.71E-05	6.66E-05	0	0	5	53
GO:0050927 positive regulation of positive chemotaxis	4	1.73E-05	3.306	0.154	Biological Process	GO:0050927	positive regulation of positive chemotaxis	1.73E-05	6.73E-05	0	0	4	26
GO:0060444 branching involved in mammary gland duct morphogenesis	4	1.73E-05	3.306	0.154	Biological Process	GO:0060444	branching involved in mammary gland duct morphogenesis	1.73E-05	6.73E-05	0	0	4	26
GO:0044085 cellular component biogenesis	41	1.74E-05	33.884	0.011	Biological Process	GO:0044085	cellular component biogenesis	1.74E-05	6.73E-05	0	0	41	3572
GO:0001892 embryonic placenta development	6	1.80E-05	4.959	0.067	Biological Process	GO:0001892	embryonic placenta development	1.80E-05	6.97E-05	0	0	6	90
GO:0048145 regulation of fibroblast proliferation	6	1.80E-05	4.959	0.067	Biological Process	GO:0048145	regulation of fibroblast proliferation	1.80E-05	6.97E-05	0	0	6	90
GO:0051781 positive regulation of cell division	6	1.80E-05	4.959	0.067	Biological Process	GO:0051781	positive regulation of cell division	1.80E-05	6.97E-05	0	0	6	90
GO:0030001 metal ion transport	18	1.81E-05	14.876	0.019	Biological Process	GO:0030001	metal ion transport	1.81E-05	6.99E-05	0	0	18	956
GO:0050867 positive regulation of cell activation	13	1.83E-05	10.744	0.025	Biological Process	GO:0050867	positive regulation of cell activation	1.83E-05	7.08E-05	0	0	13	525
GO:1901363 heterocyclic compound binding	65	7.07E-06	53.279	0.01	Molecular Function	GO:1901363	heterocyclic compound binding	7.07E-06	7.24E-05	0	0	65	6823
GO:0032964 collagen biosynthetic process	5	1.88E-05	4.132	0.093	Biological Process	GO:0032964	collagen biosynthetic process	1.88E-05	7.26E-05	0	0	5	54
GO:1900047 negative regulation of hemostasis	5	1.88E-05	4.132	0.093	Biological Process	GO:1900047	negative regulation of hemostasis	1.88E-05	7.26E-05	0	0	5	54
GO:0048144 fibroblast proliferation	6	1.92E-05	4.959	0.066	Biological Process	GO:0048144	fibroblast proliferation	1.92E-05	7.40E-05	0	0	6	91
GO:0051099 positive regulation of binding	8	2.01E-05	6.612	0.042	Biological Process	GO:0051099	positive regulation of binding	2.01E-05	7.76E-05	0	0	8	189
GO:0007176 regulation of epidermal growth factor-activated receptor activity	4	2.02E-05	3.306	0.148	Biological Process	GO:0007176	regulation of epidermal growth factor-activated receptor activity	2.02E-05	7.79E-05	0	0	4	27
GO:0050926 regulation of positive chemotaxis	4	2.02E-05	3.306	0.148	Biological Process	GO:0050926	regulation of positive chemotaxis	2.02E-05	7.79E-05	0	0	4	27
GO:0006140 regulation of nucleotide metabolic process	7	2.03E-05	5.785	0.051	Biological Process	GO:0006140	regulation of nucleotide metabolic process	2.03E-05	7.80E-05	0	0	7	137
GO:0000186 activation of MAPKK activity	5	2.06E-05	4.132	0.091	Biological Process	GO:0000186	activation of MAPKK activity	2.06E-05	7.90E-05	0	0	5	55
GO:0015872 dopamine transport	5	2.06E-05	4.132	0.091	Biological Process	GO:0015872	dopamine transport	2.06E-05	7.90E-05	0	0	5	55
GO:0098542 defense response to other organism	15	2.10E-05	12.397	0.022	Biological Process	GO:0098542	defense response to other organism	2.10E-05	8.08E-05	0	0	15	697
GO:0035821 modification of morphology or physiology of other organism	8	2.17E-05	6.612	0.042	Biological Process	GO:0035821	modification of morphology or physiology of other organism	2.17E-05	8.31E-05	0	0	8	191
GO:0019217 regulation of fatty acid metabolic process	6	2.17E-05	4.959	0.065	Biological Process	GO:0019217	regulation of fatty acid metabolic process	2.17E-05	8.31E-05	0	0	6	93
GO:0046849 bone remodeling	6	2.17E-05	4.959	0.065	Biological Process	GO:0046849	bone remodeling	2.17E-05	8.31E-05	0	0	6	93
GO:1903725 regulation of phospholipid metabolic process	6	2.17E-05	4.959	0.065	Biological Process	GO:1903725	regulation of phospholipid metabolic process	2.17E-05	8.31E-05	0	0	6	93
GO:2000177 regulation of neural precursor cell proliferation	6	2.17E-05	4.959	0.065	Biological Process	GO:2000177	regulation of neural precursor cell proliferation	2.17E-05	8.31E-05	0	0	6	93
GO:0001223 transcription coactivator binding	4	8.52E-06	3.279	0.182	Molecular Function	GO:0001223	transcription coactivator binding	8.52E-06	8.47E-05	0	0	4	22
GO:1901338 catecholamine binding	4	8.52E-06	3.279	0.182	Molecular Function	GO:1901338	catecholamine binding	8.52E-06	8.47E-05	0	0	4	22
GO:0005667 transcription factor complex	11	1.39E-05	9.016	0.029	Cellular Component	GO:0005667	transcription factor complex	1.39E-05	8.53E-05	0	0	11	385
GO:1900271 regulation of long-term synaptic potentiation	5	2.25E-05	4.132	0.089	Biological Process	GO:1900271	regulation of long-term synaptic potentiation	2.25E-05	8.59E-05	0	0	5	56
GO:0033365 protein localization to organelle	18	2.28E-05	14.876	0.018	Biological Process	GO:0033365	protein localization to organelle	2.28E-05	8.72E-05	0	0	18	973
GO:1901992 positive regulation of mitotic cell cycle phase transition	6	2.31E-05	4.959	0.064	Biological Process	GO:1901992	positive regulation of mitotic cell cycle phase transition	2.31E-05	8.81E-05	0	0	6	94
GO:0002768 immune response-regulating cell surface receptor signaling pathway	15	2.32E-05	12.397	0.021	Biological Process	GO:0002768	immune response-regulating cell surface receptor signaling pathway	2.32E-05	8.87E-05	0	0	15	703
GO:0021543 pallium development	8	2.34E-05	6.612	0.041	Biological Process	GO:0021543	pallium development	2.34E-05	8.92E-05	0	0	8	193
GO:0048169 regulation of long-term neuronal synaptic plasticity	4	2.35E-05	3.306	0.143	Biological Process	GO:0048169	regulation of long-term neuronal synaptic plasticity	2.35E-05	8.95E-05	0	0	4	28
GO:0010564 regulation of cell cycle process	17	2.53E-05	14.05	0.019	Biological Process	GO:0010564	regulation of cell cycle process	2.53E-05	9.60E-05	0	0	17	887
GO:0045741 positive regulation of epidermal growth factor-activated receptor activity	3	2.53E-05	2.479	0.3	Biological Process	GO:0045741	positive regulation of epidermal growth factor-activated receptor activity	2.53E-05	9.60E-05	0	0	3	10
GO:1903799 negative regulation of production of miRNAs involved in gene silencing by miRNA	3	2.53E-05	2.479	0.3	Biological Process	GO:1903799	negative regulation of production of miRNAs involved in gene silencing by miRNA	2.53E-05	9.60E-05	0	0	3	10
GO:1903800 positive regulation of production of miRNAs involved in gene silencing by miRNA	3	2.53E-05	2.479	0.3	Biological Process	GO:1903800	positive regulation of production of miRNAs involved in gene silencing by miRNA	2.53E-05	9.60E-05	0	0	3	10
GO:0030217 T cell differentiation	9	2.56E-05	7.438	0.035	Biological Process	GO:0030217	T cell differentiation	2.56E-05	9.73E-05	0	0	9	255
GO:0010608 posttranscriptional regulation of gene expression	17	2.60E-05	14.05	0.019	Biological Process	GO:0010608	posttranscriptional regulation of gene expression	2.60E-05	9.87E-05	0	0	17	889
GO:0050870 positive regulation of T cell activation	9	2.64E-05	7.438	0.035	Biological Process	GO:0050870	positive regulation of T cell activation	2.64E-05	0.00010017	0	0	9	256
GO:0050819 negative regulation of coagulation	5	2.67E-05	4.132	0.086	Biological Process	GO:0050819	negative regulation of coagulation	2.67E-05	0.000101087	0	0	5	58
GO:0051604 protein maturation	12	2.67E-05	9.917	0.026	Biological Process	GO:0051604	protein maturation	2.67E-05	0.000101087	0	0	12	466
GO:0010565 regulation of cellular ketone metabolic process	8	2.71E-05	6.612	0.041	Biological Process	GO:0010565	regulation of cellular ketone metabolic process	2.71E-05	0.000102522	0	0	8	197
GO:0031063 regulation of histone deacetylation	4	2.71E-05	3.306	0.138	Biological Process	GO:0031063	regulation of histone deacetylation	2.71E-05	0.000102522	0	0	4	29
GO:0045737 positive regulation of cyclin-dependent protein serine/threonine kinase activity	4	2.71E-05	3.306	0.138	Biological Process	GO:0045737	positive regulation of cyclin-dependent protein serine/threonine kinase activity	2.71E-05	0.000102522	0	0	4	29
GO:0044456 synapse part	18	1.70E-05	14.754	0.018	Cellular Component	GO:0044456	synapse part	1.70E-05	0.000102638	0	0	18	1004
GO:0030595 leukocyte chemotaxis	9	2.72E-05	7.438	0.035	Biological Process	GO:0030595	leukocyte chemotaxis	2.72E-05	0.000102848	0	0	9	257
GO:0042100 B cell proliferation	6	2.76E-05	4.959	0.062	Biological Process	GO:0042100	B cell proliferation	2.76E-05	0.00010408	0	0	6	97
GO:0061097 regulation of protein tyrosine kinase activity	6	2.76E-05	4.959	0.062	Biological Process	GO:0061097	regulation of protein tyrosine kinase activity	2.76E-05	0.00010408	0	0	6	97
GO:0005773 vacuole	17	1.79E-05	13.934	0.019	Cellular Component	GO:0005773	vacuole	1.79E-05	0.000107091	0	0	17	911
GO:0030198 extracellular matrix organization	11	2.89E-05	9.091	0.028	Biological Process	GO:0030198	extracellular matrix organization	2.89E-05	0.00010887	0	0	11	395
GO:0031295 T cell costimulation	5	2.90E-05	4.132	0.085	Biological Process	GO:0031295	T cell costimulation	2.90E-05	0.000109224	0	0	5	59
GO:1902041 regulation of extrinsic apoptotic signaling pathway via death domain receptors	5	2.90E-05	4.132	0.085	Biological Process	GO:1902041	regulation of extrinsic apoptotic signaling pathway via death domain receptors	2.90E-05	0.000109224	0	0	5	59
GO:1904064 positive regulation of cation transmembrane transport	7	2.92E-05	5.785	0.048	Biological Process	GO:1904064	positive regulation of cation transmembrane transport	2.92E-05	0.000109869	0	0	7	145
GO:0090257 regulation of muscle system process	9	2.98E-05	7.438	0.035	Biological Process	GO:0090257	regulation of muscle system process	2.98E-05	0.000112093	0	0	9	260
GO:0010821 regulation of mitochondrion organization	8	3.02E-05	6.612	0.04	Biological Process	GO:0010821	regulation of mitochondrion organization	3.02E-05	0.000113407	0	0	8	200
GO:0003824 catalytic activity	62	1.17E-05	50.82	0.01	Molecular Function	GO:0003824	catalytic activity	1.17E-05	0.000113841	0	0	62	6461
GO:0030235 nitric-oxide synthase regulator activity	3	1.18E-05	2.459	0.375	Molecular Function	GO:0030235	nitric-oxide synthase regulator activity	1.18E-05	0.000113841	0	0	3	8
GO:0042737 drug catabolic process	7	3.05E-05	5.785	0.048	Biological Process	GO:0042737	drug catabolic process	3.05E-05	0.000114589	0	0	7	146
GO:0007162 negative regulation of cell adhesion	10	3.08E-05	8.264	0.031	Biological Process	GO:0007162	negative regulation of cell adhesion	3.08E-05	0.000115476	0	0	10	327
GO:0051591 response to cAMP	6	3.10E-05	4.959	0.061	Biological Process	GO:0051591	response to cAMP	3.10E-05	0.000116135	0	0	6	99
GO:0007202 activation of phospholipase C activity	4	3.12E-05	3.306	0.133	Biological Process	GO:0007202	activation of phospholipase C activity	3.12E-05	0.000116519	0	0	4	30
GO:0010800 positive regulation of peptidyl-threonine phosphorylation	4	3.12E-05	3.306	0.133	Biological Process	GO:0010800	positive regulation of peptidyl-threonine phosphorylation	3.12E-05	0.000116519	0	0	4	30
GO:0046320 regulation of fatty acid oxidation	4	3.12E-05	3.306	0.133	Biological Process	GO:0046320	regulation of fatty acid oxidation	3.12E-05	0.000116519	0	0	4	30
GO:0031294 lymphocyte costimulation	5	3.15E-05	4.132	0.083	Biological Process	GO:0031294	lymphocyte costimulation	3.15E-05	0.000117515	0	0	5	60
GO:0032663 regulation of interleukin-2 production	5	3.15E-05	4.132	0.083	Biological Process	GO:0032663	regulation of interleukin-2 production	3.15E-05	0.000117515	0	0	5	60
GO:0090181 regulation of cholesterol metabolic process	5	3.15E-05	4.132	0.083	Biological Process	GO:0090181	regulation of cholesterol metabolic process	3.15E-05	0.000117515	0	0	5	60
GO:0097755 positive regulation of blood vessel diameter	5	3.15E-05	4.132	0.083	Biological Process	GO:0097755	positive regulation of blood vessel diameter	3.15E-05	0.000117515	0	0	5	60
GO:0006259 DNA metabolic process	19	3.36E-05	15.702	0.017	Biological Process	GO:0006259	DNA metabolic process	3.36E-05	0.000125017	0	0	19	1099
GO:0002366 leukocyte activation involved in immune response	16	3.40E-05	13.223	0.02	Biological Process	GO:0002366	leukocyte activation involved in immune response	3.40E-05	0.000126674	0	0	16	816
GO:0032370 positive regulation of lipid transport	5	3.42E-05	4.132	0.082	Biological Process	GO:0032370	positive regulation of lipid transport	3.42E-05	0.000126778	0	0	5	61
GO:0046324 regulation of glucose import	5	3.42E-05	4.132	0.082	Biological Process	GO:0046324	regulation of glucose import	3.42E-05	0.000126778	0	0	5	61
GO:0051205 protein insertion into membrane	5	3.42E-05	4.132	0.082	Biological Process	GO:0051205	protein insertion into membrane	3.42E-05	0.000126778	0	0	5	61
GO:0061098 positive regulation of protein tyrosine kinase activity	5	3.42E-05	4.132	0.082	Biological Process	GO:0061098	positive regulation of protein tyrosine kinase activity	3.42E-05	0.000126778	0	0	5	61
GO:0090303 positive regulation of wound healing	5	3.42E-05	4.132	0.082	Biological Process	GO:0090303	positive regulation of wound healing	3.42E-05	0.000126778	0	0	5	61
GO:0010918 positive regulation of mitochondrial membrane potential	3	3.46E-05	2.479	0.273	Biological Process	GO:0010918	positive regulation of mitochondrial membrane potential	3.46E-05	0.0001283	0	0	3	11
GO:0042692 muscle cell differentiation	11	3.47E-05	9.091	0.027	Biological Process	GO:0042692	muscle cell differentiation	3.47E-05	0.000128549	0	0	11	403
GO:0000278 mitotic cell cycle	19	3.48E-05	15.702	0.017	Biological Process	GO:0000278	mitotic cell cycle	3.48E-05	0.000128942	0	0	19	1102
GO:0010543 regulation of platelet activation	4	3.56E-05	3.306	0.129	Biological Process	GO:0010543	regulation of platelet activation	3.56E-05	0.000131697	0	0	4	31
GO:0010743 regulation of macrophage derived foam cell differentiation	4	3.56E-05	3.306	0.129	Biological Process	GO:0010743	regulation of macrophage derived foam cell differentiation	3.56E-05	0.000131697	0	0	4	31
GO:0071901 negative regulation of protein serine/threonine kinase activity	7	3.63E-05	5.785	0.047	Biological Process	GO:0071901	negative regulation of protein serine/threonine kinase activity	3.63E-05	0.000134209	0	0	7	150
GO:0014806 smooth muscle hyperplasia	2	3.64E-05	1.653	1	Biological Process	GO:0014806	smooth muscle hyperplasia	3.64E-05	0.000134388	0	0	2	2
GO:0045994 positive regulation of translational initiation by iron	2	3.64E-05	1.653	1	Biological Process	GO:0045994	positive regulation of translational initiation by iron	3.64E-05	0.000134388	0	0	2	2
GO:0072363 regulation of glycolytic process by positive regulation of transcription from RNA polymerase II promoter	2	3.64E-05	1.653	1	Biological Process	GO:0072363	regulation of glycolytic process by positive regulation of transcription from RNA polymerase II promoter	3.64E-05	0.000134388	0	0	2	2
GO:0002042 cell migration involved in sprouting angiogenesis	6	3.67E-05	4.959	0.059	Biological Process	GO:0002042	cell migration involved in sprouting angiogenesis	3.67E-05	0.000135262	0	0	6	102
GO:0032922 circadian regulation of gene expression	5	3.70E-05	4.132	0.081	Biological Process	GO:0032922	circadian regulation of gene expression	3.70E-05	0.000136205	0	0	5	62
GO:0016570 histone modification	12	3.86E-05	9.917	0.025	Biological Process	GO:0016570	histone modification	3.86E-05	0.000142071	0	0	12	484
GO:0005080 protein kinase C binding	5	1.53E-05	4.098	0.096	Molecular Function	GO:0005080	protein kinase C binding	1.53E-05	0.000146203	0	0	5	52
GO:0032371 regulation of sterol transport	5	4.00E-05	4.132	0.079	Biological Process	GO:0032371	regulation of sterol transport	4.00E-05	0.000146733	0	0	5	63
GO:0032374 regulation of cholesterol transport	5	4.00E-05	4.132	0.079	Biological Process	GO:0032374	regulation of cholesterol transport	4.00E-05	0.000146733	0	0	5	63
GO:0051893 regulation of focal adhesion assembly	5	4.00E-05	4.132	0.079	Biological Process	GO:0051893	regulation of focal adhesion assembly	4.00E-05	0.000146733	0	0	5	63
GO:0090109 regulation of cell-substrate junction assembly	5	4.00E-05	4.132	0.079	Biological Process	GO:0090109	regulation of cell-substrate junction assembly	4.00E-05	0.000146733	0	0	5	63
GO:0090596 sensory organ morphogenesis	9	4.01E-05	7.438	0.033	Biological Process	GO:0090596	sensory organ morphogenesis	4.01E-05	0.000146889	0	0	9	270
GO:0019098 reproductive behavior	4	4.05E-05	3.306	0.125	Biological Process	GO:0019098	reproductive behavior	4.05E-05	0.000148285	0	0	4	32
GO:0032743 positive regulation of interleukin-2 production	4	4.05E-05	3.306	0.125	Biological Process	GO:0032743	positive regulation of interleukin-2 production	4.05E-05	0.000148285	0	0	4	32
GO:2000108 positive regulation of leukocyte apoptotic process	4	4.05E-05	3.306	0.125	Biological Process	GO:2000108	positive regulation of leukocyte apoptotic process	4.05E-05	0.000148285	0	0	4	32
GO:0097367 carbohydrate derivative binding	32	1.58E-05	26.23	0.013	Molecular Function	GO:0097367	carbohydrate derivative binding	1.58E-05	0.000148663	0	0	32	2449
GO:0018958 phenol-containing compound metabolic process	6	4.10E-05	4.959	0.058	Biological Process	GO:0018958	phenol-containing compound metabolic process	4.10E-05	0.000149703	0	0	6	104
GO:0044264 cellular polysaccharide metabolic process	6	4.10E-05	4.959	0.058	Biological Process	GO:0044264	cellular polysaccharide metabolic process	4.10E-05	0.000149703	0	0	6	104
GO:0034605 cellular response to heat	7	4.30E-05	5.785	0.045	Biological Process	GO:0034605	cellular response to heat	4.30E-05	0.000156835	0	0	7	154
GO:0035264 multicellular organism growth	7	4.30E-05	5.785	0.045	Biological Process	GO:0035264	multicellular organism growth	4.30E-05	0.000156835	0	0	7	154
GO:0002260 lymphocyte homeostasis	5	4.32E-05	4.132	0.078	Biological Process	GO:0002260	lymphocyte homeostasis	4.32E-05	0.000157226	0	0	5	64
GO:0045453 bone resorption	5	4.32E-05	4.132	0.078	Biological Process	GO:0045453	bone resorption	4.32E-05	0.000157226	0	0	5	64
GO:0097345 mitochondrial outer membrane permeabilization	5	4.32E-05	4.132	0.078	Biological Process	GO:0097345	mitochondrial outer membrane permeabilization	4.32E-05	0.000157226	0	0	5	64
GO:0062014 negative regulation of small molecule metabolic process	6	4.32E-05	4.959	0.057	Biological Process	GO:0062014	negative regulation of small molecule metabolic process	4.32E-05	0.000157357	0	0	6	105
GO:0008504 monoamine transmembrane transporter activity	3	1.76E-05	2.459	0.333	Molecular Function	GO:0008504	monoamine transmembrane transporter activity	1.76E-05	0.000163116	0	0	3	9
GO:0007411 axon guidance	9	4.49E-05	7.438	0.033	Biological Process	GO:0007411	axon guidance	4.49E-05	0.000163209	0	0	9	274
GO:0010951 negative regulation of endopeptidase activity	9	4.49E-05	7.438	0.033	Biological Process	GO:0010951	negative regulation of endopeptidase activity	4.49E-05	0.000163209	0	0	9	274
GO:0046928 regulation of neurotransmitter secretion	6	4.56E-05	4.959	0.057	Biological Process	GO:0046928	regulation of neurotransmitter secretion	4.56E-05	0.000165645	0	0	6	106
GO:1902115 regulation of organelle assembly	8	4.57E-05	6.612	0.038	Biological Process	GO:1902115	regulation of organelle assembly	4.57E-05	0.000165917	0	0	8	212
GO:0001844 protein insertion into mitochondrial membrane involved in apoptotic signaling pathway	4	4.59E-05	3.306	0.121	Biological Process	GO:0001844	protein insertion into mitochondrial membrane involved in apoptotic signaling pathway	4.59E-05	0.000165977	0	0	4	33
GO:0010574 regulation of vascular endothelial growth factor production	4	4.59E-05	3.306	0.121	Biological Process	GO:0010574	regulation of vascular endothelial growth factor production	4.59E-05	0.000165977	0	0	4	33
GO:1902692 regulation of neuroblast proliferation	4	4.59E-05	3.306	0.121	Biological Process	GO:1902692	regulation of neuroblast proliferation	4.59E-05	0.000165977	0	0	4	33
GO:1904031 positive regulation of cyclin-dependent protein kinase activity	4	4.59E-05	3.306	0.121	Biological Process	GO:1904031	positive regulation of cyclin-dependent protein kinase activity	4.59E-05	0.000165977	0	0	4	33
GO:0010870 positive regulation of receptor biosynthetic process	3	4.59E-05	2.479	0.25	Biological Process	GO:0010870	positive regulation of receptor biosynthetic process	4.59E-05	0.000165977	0	0	3	12
GO:0051974 negative regulation of telomerase activity	3	4.59E-05	2.479	0.25	Biological Process	GO:0051974	negative regulation of telomerase activity	4.59E-05	0.000165977	0	0	3	12
GO:0090594 inflammatory response to wounding	3	4.59E-05	2.479	0.25	Biological Process	GO:0090594	inflammatory response to wounding	4.59E-05	0.000165977	0	0	3	12
GO:0097485 neuron projection guidance	9	4.62E-05	7.438	0.033	Biological Process	GO:0097485	neuron projection guidance	4.62E-05	0.000166696	0	0	9	275
GO:0034220 ion transmembrane transport	20	4.62E-05	16.529	0.016	Biological Process	GO:0034220	ion transmembrane transport	4.62E-05	0.000166696	0	0	20	1226
GO:0048489 synaptic vesicle transport	7	4.67E-05	5.785	0.045	Biological Process	GO:0048489	synaptic vesicle transport	4.67E-05	0.000168105	0	0	7	156
GO:0097480 establishment of synaptic vesicle localization	7	4.67E-05	5.785	0.045	Biological Process	GO:0097480	establishment of synaptic vesicle localization	4.67E-05	0.000168105	0	0	7	156
GO:0031099 regeneration	8	4.88E-05	6.612	0.037	Biological Process	GO:0031099	regeneration	4.88E-05	0.000175791	0	0	8	214
GO:0045926 negative regulation of growth	9	4.88E-05	7.438	0.032	Biological Process	GO:0045926	negative regulation of growth	4.88E-05	0.000175791	0	0	9	277
GO:0032984 protein-containing complex disassembly	10	5.08E-05	8.264	0.029	Biological Process	GO:0032984	protein-containing complex disassembly	5.08E-05	0.000182726	0	0	10	347
GO:0000166 nucleotide binding	31	2.12E-05	25.41	0.013	Molecular Function	GO:0000166	nucleotide binding	2.12E-05	0.000193284	0	0	31	2366
GO:1901265 nucleoside phosphate binding	31	2.14E-05	25.41	0.013	Molecular Function	GO:1901265	nucleoside phosphate binding	2.14E-05	0.000193284	0	0	31	2367
GO:0002757 immune response-activating signal transduction	16	5.38E-05	13.223	0.019	Biological Process	GO:0002757	immune response-activating signal transduction	5.38E-05	0.000193493	0	0	16	848
GO:0002696 positive regulation of leukocyte activation	12	5.59E-05	9.917	0.024	Biological Process	GO:0002696	positive regulation of leukocyte activation	5.59E-05	0.000200907	0	0	12	503
GO:1901989 positive regulation of cell cycle phase transition	6	5.61E-05	4.959	0.055	Biological Process	GO:1901989	positive regulation of cell cycle phase transition	5.61E-05	0.000201483	0	0	6	110
GO:0016569 covalent chromatin modification	12	5.70E-05	9.917	0.024	Biological Process	GO:0016569	covalent chromatin modification	5.70E-05	0.000204492	0	0	12	504
GO:1903672 positive regulation of sprouting angiogenesis	5	5.79E-05	4.132	0.074	Biological Process	GO:1903672	positive regulation of sprouting angiogenesis	5.79E-05	0.000207488	0	0	5	68
GO:0001975 response to amphetamine	4	5.82E-05	3.306	0.114	Biological Process	GO:0001975	response to amphetamine	5.82E-05	0.000207829	0	0	4	35
GO:0007263 nitric oxide mediated signal transduction	4	5.82E-05	3.306	0.114	Biological Process	GO:0007263	nitric oxide mediated signal transduction	5.82E-05	0.000207829	0	0	4	35
GO:0010573 vascular endothelial growth factor production	4	5.82E-05	3.306	0.114	Biological Process	GO:0010573	vascular endothelial growth factor production	5.82E-05	0.000207829	0	0	4	35
GO:0060603 mammary gland duct morphogenesis	4	5.82E-05	3.306	0.114	Biological Process	GO:0060603	mammary gland duct morphogenesis	5.82E-05	0.000207829	0	0	4	35
GO:0071402 cellular response to lipoprotein particle stimulus	4	5.82E-05	3.306	0.114	Biological Process	GO:0071402	cellular response to lipoprotein particle stimulus	5.82E-05	0.000207829	0	0	4	35
GO:0090407 organophosphate biosynthetic process	15	5.84E-05	12.397	0.02	Biological Process	GO:0090407	organophosphate biosynthetic process	5.84E-05	0.000208448	0	0	15	762
GO:0010745 negative regulation of macrophage derived foam cell differentiation	3	5.95E-05	2.479	0.231	Biological Process	GO:0010745	negative regulation of macrophage derived foam cell differentiation	5.95E-05	0.000211978	0	0	3	13
GO:0061029 eyelid development in camera-type eye	3	5.95E-05	2.479	0.231	Biological Process	GO:0061029	eyelid development in camera-type eye	5.95E-05	0.000211978	0	0	3	13
GO:0010466 negative regulation of peptidase activity	9	6.08E-05	7.438	0.032	Biological Process	GO:0010466	negative regulation of peptidase activity	6.08E-05	0.000216648	0	0	9	285
GO:0032409 regulation of transporter activity	9	6.08E-05	7.438	0.032	Biological Process	GO:0032409	regulation of transporter activity	6.08E-05	0.000216648	0	0	9	285
GO:0034404 nucleobase-containing small molecule biosynthetic process	8	6.13E-05	6.612	0.036	Biological Process	GO:0034404	nucleobase-containing small molecule biosynthetic process	6.13E-05	0.000217989	0	0	8	221
GO:0000978 RNA polymerase II proximal promoter sequence-specific DNA binding	13	2.47E-05	10.656	0.024	Molecular Function	GO:0000978	RNA polymerase II proximal promoter sequence-specific DNA binding	2.47E-05	0.000220097	0	0	13	542
GO:0004954 prostanoid receptor activity	3	2.50E-05	2.459	0.3	Molecular Function	GO:0004954	prostanoid receptor activity	2.50E-05	0.000220097	0	0	3	10
GO:0002637 regulation of immunoglobulin production	5	6.21E-05	4.132	0.072	Biological Process	GO:0002637	regulation of immunoglobulin production	6.21E-05	0.00022057	0	0	5	69
GO:0032623 interleukin-2 production	5	6.21E-05	4.132	0.072	Biological Process	GO:0032623	interleukin-2 production	6.21E-05	0.00022057	0	0	5	69
GO:1903391 regulation of adherens junction organization	5	6.21E-05	4.132	0.072	Biological Process	GO:1903391	regulation of adherens junction organization	6.21E-05	0.00022057	0	0	5	69
GO:0045664 regulation of neuron differentiation	14	6.31E-05	11.57	0.021	Biological Process	GO:0045664	regulation of neuron differentiation	6.31E-05	0.000223876	0	0	14	678
GO:0051059 NF-kappaB binding	4	2.68E-05	3.279	0.138	Molecular Function	GO:0051059	NF-kappaB binding	2.68E-05	0.000232606	0	0	4	29
GO:1903305 regulation of regulated secretory pathway	7	6.66E-05	5.785	0.042	Biological Process	GO:1903305	regulation of regulated secretory pathway	6.66E-05	0.000235774	0	0	7	165
GO:0033627 cell adhesion mediated by integrin	5	6.66E-05	4.132	0.071	Biological Process	GO:0033627	cell adhesion mediated by integrin	6.66E-05	0.000235774	0	0	5	70
GO:1902110 positive regulation of mitochondrial membrane permeability involved in apoptotic process	5	6.66E-05	4.132	0.071	Biological Process	GO:1902110	positive regulation of mitochondrial membrane permeability involved in apoptotic process	6.66E-05	0.000235774	0	0	5	70
GO:0046620 regulation of organ growth	6	6.85E-05	4.959	0.053	Biological Process	GO:0046620	regulation of organ growth	6.85E-05	0.000242603	0	0	6	114
GO:0072091 regulation of stem cell proliferation	5	7.13E-05	4.132	0.07	Biological Process	GO:0072091	regulation of stem cell proliferation	7.13E-05	0.000252084	0	0	5	71
GO:0009206 purine ribonucleoside triphosphate biosynthetic process	7	7.18E-05	5.785	0.042	Biological Process	GO:0009206	purine ribonucleoside triphosphate biosynthetic process	7.18E-05	0.000253677	0	0	7	167
GO:0043271 negative regulation of ion transport	7	7.18E-05	5.785	0.042	Biological Process	GO:0043271	negative regulation of ion transport	7.18E-05	0.000253677	0	0	7	167
GO:0017158 regulation of calcium ion-dependent exocytosis	6	7.20E-05	4.959	0.052	Biological Process	GO:0017158	regulation of calcium ion-dependent exocytosis	7.20E-05	0.000253869	0	0	6	115
GO:0021761 limbic system development	6	7.20E-05	4.959	0.052	Biological Process	GO:0021761	limbic system development	7.20E-05	0.000253869	0	0	6	115
GO:0001893 maternal placenta development	4	7.27E-05	3.306	0.108	Biological Process	GO:0001893	maternal placenta development	7.27E-05	0.00025598	0	0	4	37
GO:0030212 hyaluronan metabolic process	4	7.27E-05	3.306	0.108	Biological Process	GO:0030212	hyaluronan metabolic process	7.27E-05	0.00025598	0	0	4	37
GO:0051204 protein insertion into mitochondrial membrane	4	7.27E-05	3.306	0.108	Biological Process	GO:0051204	protein insertion into mitochondrial membrane	7.27E-05	0.00025598	0	0	4	37
GO:0009145 purine nucleoside triphosphate biosynthetic process	7	7.46E-05	5.785	0.042	Biological Process	GO:0009145	purine nucleoside triphosphate biosynthetic process	7.46E-05	0.000262191	0	0	7	168
GO:0097479 synaptic vesicle localization	7	7.46E-05	5.785	0.042	Biological Process	GO:0097479	synaptic vesicle localization	7.46E-05	0.000262191	0	0	7	168
GO:0031348 negative regulation of defense response	9	7.52E-05	7.438	0.031	Biological Process	GO:0031348	negative regulation of defense response	7.52E-05	0.000264234	0	0	9	293
GO:0030213 hyaluronan biosynthetic process	3	7.53E-05	2.479	0.214	Biological Process	GO:0030213	hyaluronan biosynthetic process	7.53E-05	0.000264234	0	0	3	14
GO:0043217 myelin maintenance	3	7.53E-05	2.479	0.214	Biological Process	GO:0043217	myelin maintenance	7.53E-05	0.000264234	0	0	3	14
GO:0090399 replicative senescence	3	7.53E-05	2.479	0.214	Biological Process	GO:0090399	replicative senescence	7.53E-05	0.000264234	0	0	3	14
GO:0015909 long-chain fatty acid transport	5	7.62E-05	4.132	0.069	Biological Process	GO:0015909	long-chain fatty acid transport	7.62E-05	0.000266795	0	0	5	72
GO:0040014 regulation of multicellular organism growth	5	7.62E-05	4.132	0.069	Biological Process	GO:0040014	regulation of multicellular organism growth	7.62E-05	0.000266795	0	0	5	72
GO:1902686 mitochondrial outer membrane permeabilization involved in programmed cell death	5	7.62E-05	4.132	0.069	Biological Process	GO:1902686	mitochondrial outer membrane permeabilization involved in programmed cell death	7.62E-05	0.000266795	0	0	5	72
GO:0120035 regulation of plasma membrane bounded cell projection organization	14	7.72E-05	11.57	0.02	Biological Process	GO:0120035	regulation of plasma membrane bounded cell projection organization	7.72E-05	0.00027019	0	0	14	691
GO:0008022 protein C-terminus binding	8	3.17E-05	6.557	0.04	Molecular Function	GO:0008022	protein C-terminus binding	3.17E-05	0.000271802	0	0	8	202
GO:0000987 proximal promoter sequence-specific DNA binding	13	3.22E-05	10.656	0.023	Molecular Function	GO:0000987	proximal promoter sequence-specific DNA binding	3.22E-05	0.000272676	0	0	13	556
GO:0042303 molting cycle	6	7.92E-05	4.959	0.051	Biological Process	GO:0042303	molting cycle	7.92E-05	0.000276714	0	0	6	117
GO:0042633 hair cycle	6	7.92E-05	4.959	0.051	Biological Process	GO:0042633	hair cycle	7.92E-05	0.000276714	0	0	6	117
GO:0042417 dopamine metabolic process	4	8.09E-05	3.306	0.105	Biological Process	GO:0042417	dopamine metabolic process	8.09E-05	0.000281819	0	0	4	38
GO:0046326 positive regulation of glucose import	4	8.09E-05	3.306	0.105	Biological Process	GO:0046326	positive regulation of glucose import	8.09E-05	0.000281819	0	0	4	38
GO:0090218 positive regulation of lipid kinase activity	4	8.09E-05	3.306	0.105	Biological Process	GO:0090218	positive regulation of lipid kinase activity	8.09E-05	0.000281819	0	0	4	38
GO:1900745 positive regulation of p38MAPK cascade	4	8.09E-05	3.306	0.105	Biological Process	GO:1900745	positive regulation of p38MAPK cascade	8.09E-05	0.000281819	0	0	4	38
GO:0071242 cellular response to ammonium ion	5	8.14E-05	4.132	0.068	Biological Process	GO:0071242	cellular response to ammonium ion	8.14E-05	0.000283563	0	0	5	73
GO:0015378 sodium:chloride symporter activity	3	3.43E-05	2.459	0.273	Molecular Function	GO:0015378	sodium:chloride symporter activity	3.43E-05	0.0002866	0	0	3	11
GO:0032649 regulation of interferon-gamma production	6	8.30E-05	4.959	0.051	Biological Process	GO:0032649	regulation of interferon-gamma production	8.30E-05	0.000288986	0	0	6	118
GO:0003990 acetylcholinesterase activity	2	3.62E-05	1.639	1	Molecular Function	GO:0003990	acetylcholinesterase activity	3.62E-05	0.000299175	0	0	2	2
GO:0035051 cardiocyte differentiation	7	8.64E-05	5.785	0.041	Biological Process	GO:0035051	cardiocyte differentiation	8.64E-05	0.000300621	0	0	7	172
GO:0033555 multicellular organismal response to stress	5	8.69E-05	4.132	0.068	Biological Process	GO:0033555	multicellular organismal response to stress	8.69E-05	0.000301675	0	0	5	74
GO:0035794 positive regulation of mitochondrial membrane permeability	5	8.69E-05	4.132	0.068	Biological Process	GO:0035794	positive regulation of mitochondrial membrane permeability	8.69E-05	0.000301675	0	0	5	74
GO:0070227 lymphocyte apoptotic process	5	8.69E-05	4.132	0.068	Biological Process	GO:0070227	lymphocyte apoptotic process	8.69E-05	0.000301675	0	0	5	74
GO:0002065 columnar/cuboidal epithelial cell differentiation	6	8.70E-05	4.959	0.05	Biological Process	GO:0002065	columnar/cuboidal epithelial cell differentiation	8.70E-05	0.000301865	0	0	6	119
GO:0003015 heart process	9	8.78E-05	7.438	0.03	Biological Process	GO:0003015	heart process	8.78E-05	0.000304467	0	0	9	299
GO:0006937 regulation of muscle contraction	7	8.96E-05	5.785	0.04	Biological Process	GO:0006937	regulation of muscle contraction	8.96E-05	0.000309961	0	0	7	173
GO:0009201 ribonucleoside triphosphate biosynthetic process	7	8.96E-05	5.785	0.04	Biological Process	GO:0009201	ribonucleoside triphosphate biosynthetic process	8.96E-05	0.000309961	0	0	7	173
GO:0014037 Schwann cell differentiation	4	8.97E-05	3.306	0.103	Biological Process	GO:0014037	Schwann cell differentiation	8.97E-05	0.000309961	0	0	4	39
GO:0090050 positive regulation of cell migration involved in sprouting angiogenesis	4	8.97E-05	3.306	0.103	Biological Process	GO:0090050	positive regulation of cell migration involved in sprouting angiogenesis	8.97E-05	0.000309961	0	0	4	39
GO:0097421 liver regeneration	4	8.97E-05	3.306	0.103	Biological Process	GO:0097421	liver regeneration	8.97E-05	0.000309961	0	0	4	39
GO:0031344 regulation of cell projection organization	14	8.99E-05	11.57	0.02	Biological Process	GO:0031344	regulation of cell projection organization	8.99E-05	0.000310592	0	0	14	701
GO:0005488 binding	119	4.00E-05	97.541	0.007	Molecular Function	GO:0005488	binding	4.00E-05	0.000322765	0	0	119	17541
GO:0051721 protein phosphatase 2A binding	4	4.00E-05	3.279	0.125	Molecular Function	GO:0051721	protein phosphatase 2A binding	4.00E-05	0.000322765	0	0	4	32
GO:0034349 glial cell apoptotic process	3	9.38E-05	2.479	0.2	Biological Process	GO:0034349	glial cell apoptotic process	9.38E-05	0.000322956	0	0	3	15
GO:0046321 positive regulation of fatty acid oxidation	3	9.38E-05	2.479	0.2	Biological Process	GO:0046321	positive regulation of fatty acid oxidation	9.38E-05	0.000322956	0	0	3	15
GO:0060134 prepulse inhibition	3	9.38E-05	2.479	0.2	Biological Process	GO:0060134	prepulse inhibition	9.38E-05	0.000322956	0	0	3	15
GO:2001028 positive regulation of endothelial cell chemotaxis	3	9.38E-05	2.479	0.2	Biological Process	GO:2001028	positive regulation of endothelial cell chemotaxis	9.38E-05	0.000322956	0	0	3	15
GO:0060147 regulation of posttranscriptional gene silencing	6	9.54E-05	4.959	0.05	Biological Process	GO:0060147	regulation of posttranscriptional gene silencing	9.54E-05	0.000328318	0	0	6	121
GO:0060966 regulation of gene silencing by RNA	6	9.54E-05	4.959	0.05	Biological Process	GO:0060966	regulation of gene silencing by RNA	9.54E-05	0.000328318	0	0	6	121
GO:1902108 regulation of mitochondrial membrane permeability involved in apoptotic process	5	9.87E-05	4.132	0.066	Biological Process	GO:1902108	regulation of mitochondrial membrane permeability involved in apoptotic process	9.87E-05	0.000339392	0	0	5	76
GO:0010874 regulation of cholesterol efflux	4	9.92E-05	3.306	0.1	Biological Process	GO:0010874	regulation of cholesterol efflux	9.92E-05	0.000340181	0	0	4	40
GO:0043029 T cell homeostasis	4	9.92E-05	3.306	0.1	Biological Process	GO:0043029	T cell homeostasis	9.92E-05	0.000340181	0	0	4	40
GO:0045746 negative regulation of Notch signaling pathway	4	9.92E-05	3.306	0.1	Biological Process	GO:0045746	negative regulation of Notch signaling pathway	9.92E-05	0.000340181	0	0	4	40
GO:0071470 cellular response to osmotic stress	4	9.92E-05	3.306	0.1	Biological Process	GO:0071470	cellular response to osmotic stress	9.92E-05	0.000340181	0	0	4	40
GO:0046907 intracellular transport	26	9.94E-05	21.488	0.013	Biological Process	GO:0046907	intracellular transport	9.94E-05	0.000340793	0	0	26	1960
GO:0043604 amide biosynthetic process	17	9.99E-05	14.05	0.017	Biological Process	GO:0043604	amide biosynthetic process	9.99E-05	0.00034226	0	0	17	991
GO:0031406 carboxylic acid binding	8	4.32E-05	6.557	0.038	Molecular Function	GO:0031406	carboxylic acid binding	4.32E-05	0.00034463	0	0	8	211
GO:0016079 synaptic vesicle exocytosis	6	0.000104481	4.959	0.049	Biological Process	GO:0016079	synaptic vesicle exocytosis	0.000104481	0.000357634	0	0	6	123
GO:0043560 insulin receptor substrate binding	3	4.55E-05	2.459	0.25	Molecular Function	GO:0043560	insulin receptor substrate binding	4.55E-05	0.000358583	0	0	3	12
GO:0043627 response to estrogen	5	0.000105059	4.132	0.065	Biological Process	GO:0043627	response to estrogen	0.000105059	0.000359156	0	0	5	77
GO:1905710 positive regulation of membrane permeability	5	0.000105059	4.132	0.065	Biological Process	GO:1905710	positive regulation of membrane permeability	0.000105059	0.000359156	0	0	5	77
GO:0009166 nucleotide catabolic process	7	0.000107099	5.785	0.039	Biological Process	GO:0009166	nucleotide catabolic process	0.000107099	0.000365899	0	0	7	178
GO:0030111 regulation of Wnt signaling pathway	10	0.000107867	8.264	0.026	Biological Process	GO:0030111	regulation of Wnt signaling pathway	0.000107867	0.000368291	0	0	10	380
GO:0019953 sexual reproduction	16	0.000108063	13.223	0.018	Biological Process	GO:0019953	sexual reproduction	0.000108063	0.000368727	0	0	16	900
GO:0002874 regulation of chronic inflammatory response to antigenic stimulus	2	0.000108908	1.653	0.667	Biological Process	GO:0002874	regulation of chronic inflammatory response to antigenic stimulus	0.000108908	0.000369506	0	0	2	3
GO:0002904 positive regulation of B cell apoptotic process	2	0.000108908	1.653	0.667	Biological Process	GO:0002904	positive regulation of B cell apoptotic process	0.000108908	0.000369506	0	0	2	3
GO:0006447 regulation of translational initiation by iron	2	0.000108908	1.653	0.667	Biological Process	GO:0006447	regulation of translational initiation by iron	0.000108908	0.000369506	0	0	2	3
GO:0006808 regulation of nitrogen utilization	2	0.000108908	1.653	0.667	Biological Process	GO:0006808	regulation of nitrogen utilization	0.000108908	0.000369506	0	0	2	3
GO:0061198 fungiform papilla formation	2	0.000108908	1.653	0.667	Biological Process	GO:0061198	fungiform papilla formation	0.000108908	0.000369506	0	0	2	3
GO:0072361 regulation of glycolytic process by regulation of transcription from RNA polymerase II promoter	2	0.000108908	1.653	0.667	Biological Process	GO:0072361	regulation of glycolytic process by regulation of transcription from RNA polymerase II promoter	0.000108908	0.000369506	0	0	2	3
GO:0098679 regulation of carbohydrate catabolic process by regulation of transcription from RNA polymerase II promoter	2	0.000108908	1.653	0.667	Biological Process	GO:0098679	regulation of carbohydrate catabolic process by regulation of transcription from RNA polymerase II promoter	0.000108908	0.000369506	0	0	2	3
GO:1904880 response to hydrogen sulfide	2	0.000108908	1.653	0.667	Biological Process	GO:1904880	response to hydrogen sulfide	0.000108908	0.000369506	0	0	2	3
GO:2000097 regulation of smooth muscle cell-matrix adhesion	2	0.000108908	1.653	0.667	Biological Process	GO:2000097	regulation of smooth muscle cell-matrix adhesion	0.000108908	0.000369506	0	0	2	3
GO:0046825 regulation of protein export from nucleus	4	0.000109404	3.306	0.098	Biological Process	GO:0046825	regulation of protein export from nucleus	0.000109404	0.000370957	0	0	4	41
GO:0051146 striated muscle cell differentiation	9	0.000109989	7.438	0.029	Biological Process	GO:0051146	striated muscle cell differentiation	0.000109989	0.000372706	0	0	9	308
GO:0050866 negative regulation of cell activation	8	0.000112013	6.612	0.033	Biological Process	GO:0050866	negative regulation of cell activation	0.000112013	0.000379325	0	0	8	241
GO:0016021 integral component of membrane	60	6.57E-05	49.18	0.009	Cellular Component	GO:0016021	integral component of membrane	6.57E-05	0.00038762	0	0	60	6832
GO:0042447 hormone catabolic process	3	0.000114877	2.479	0.188	Biological Process	GO:0042447	hormone catabolic process	0.000114877	0.000388537	0	0	3	16
GO:0045838 positive regulation of membrane potential	3	0.000114877	2.479	0.188	Biological Process	GO:0045838	positive regulation of membrane potential	0.000114877	0.000388537	0	0	3	16
GO:0031224 intrinsic component of membrane	61	6.80E-05	50	0.009	Cellular Component	GO:0031224	intrinsic component of membrane	6.80E-05	0.000396583	0	0	61	6999
GO:0009127 purine nucleoside monophosphate biosynthetic process	7	0.000118846	5.785	0.039	Biological Process	GO:0009127	purine nucleoside monophosphate biosynthetic process	0.000118846	0.000401207	0	0	7	181
GO:0009168 purine ribonucleoside monophosphate biosynthetic process	7	0.000118846	5.785	0.039	Biological Process	GO:0009168	purine ribonucleoside monophosphate biosynthetic process	0.000118846	0.000401207	0	0	7	181
GO:0016241 regulation of macroautophagy	7	0.000118846	5.785	0.039	Biological Process	GO:0016241	regulation of macroautophagy	0.000118846	0.000401207	0	0	7	181
GO:0030225 macrophage differentiation	4	0.000120357	3.306	0.095	Biological Process	GO:0030225	macrophage differentiation	0.000120357	0.000406053	0	0	4	42
GO:0033293 monocarboxylic acid binding	5	5.30E-05	4.098	0.075	Molecular Function	GO:0033293	monocarboxylic acid binding	5.30E-05	0.000413538	0	0	5	67
GO:0016236 macroautophagy	9	0.000124212	7.438	0.029	Biological Process	GO:0016236	macroautophagy	0.000124212	0.000418799	0	0	9	313
GO:0051186 cofactor metabolic process	13	0.000125447	10.744	0.021	Biological Process	GO:0051186	cofactor metabolic process	0.000125447	0.000422558	0	0	13	634
GO:0097529 myeloid leukocyte migration	8	0.000125483	6.612	0.033	Biological Process	GO:0097529	myeloid leukocyte migration	0.000125483	0.000422558	0	0	8	245
GO:0051937 catecholamine transport	5	0.000125994	4.132	0.062	Biological Process	GO:0051937	catecholamine transport	0.000125994	0.000424011	0	0	5	80
GO:0048469 cell maturation	7	0.000127243	5.785	0.038	Biological Process	GO:0048469	cell maturation	0.000127243	0.00042795	0	0	7	183
GO:0051817 modification of morphology or physiology of other organism involved in symbiotic interaction	6	0.000130116	4.959	0.047	Biological Process	GO:0051817	modification of morphology or physiology of other organism involved in symbiotic interaction	0.000130116	0.000437338	0	0	6	128
GO:0006164 purine nucleotide biosynthetic process	9	0.000130317	7.438	0.029	Biological Process	GO:0006164	purine nucleotide biosynthetic process	0.000130317	0.000437743	0	0	9	315
GO:1901292 nucleoside phosphate catabolic process	7	0.000131619	5.785	0.038	Biological Process	GO:1901292	nucleoside phosphate catabolic process	0.000131619	0.000441842	0	0	7	184
GO:0001103 RNA polymerase II repressing transcription factor binding	4	5.74E-05	3.279	0.114	Molecular Function	GO:0001103	RNA polymerase II repressing transcription factor binding	5.74E-05	0.000442606	0	0	4	35
GO:0019048 modulation by virus of host morphology or physiology	4	0.000132082	3.306	0.093	Biological Process	GO:0019048	modulation by virus of host morphology or physiology	0.000132082	0.00044312	0	0	4	43
GO:0006820 anion transport	13	0.000133498	10.744	0.02	Biological Process	GO:0006820	anion transport	0.000133498	0.000447591	0	0	13	638
GO:0098655 cation transmembrane transport	16	0.000135753	13.223	0.017	Biological Process	GO:0098655	cation transmembrane transport	0.000135753	0.00045487	0	0	16	918
GO:0009142 nucleoside triphosphate biosynthetic process	7	0.000136117	5.785	0.038	Biological Process	GO:0009142	nucleoside triphosphate biosynthetic process	0.000136117	0.000455806	0	0	7	185
GO:0006469 negative regulation of protein kinase activity	8	0.000140267	6.612	0.032	Biological Process	GO:0006469	negative regulation of protein kinase activity	0.000140267	0.00046941	0	0	8	249
GO:0046394 carboxylic acid biosynthetic process	11	0.000141914	9.091	0.023	Biological Process	GO:0046394	carboxylic acid biosynthetic process	0.000141914	0.000474629	0	0	11	472
GO:0016053 organic acid biosynthetic process	11	0.000144557	9.091	0.023	Biological Process	GO:0016053	organic acid biosynthetic process	0.000144557	0.000483058	0	0	11	473
GO:0008631 intrinsic apoptotic signaling pathway in response to oxidative stress	4	0.000144613	3.306	0.091	Biological Process	GO:0008631	intrinsic apoptotic signaling pathway in response to oxidative stress	0.000144613	0.000483058	0	0	4	44
GO:0050770 regulation of axonogenesis	7	0.000145486	5.785	0.037	Biological Process	GO:0050770	regulation of axonogenesis	0.000145486	0.000485673	0	0	7	187
GO:0043177 organic acid binding	8	6.38E-05	6.557	0.036	Molecular Function	GO:0043177	organic acid binding	6.38E-05	0.000486268	0	0	8	223
GO:0031100 animal organ regeneration	5	0.000149986	4.132	0.06	Biological Process	GO:0031100	animal organ regeneration	0.000149986	0.000500384	0	0	5	83
GO:0008083 growth factor activity	7	6.77E-05	5.738	0.042	Molecular Function	GO:0008083	growth factor activity	6.77E-05	0.000510656	0	0	7	166
GO:0002444 myeloid leukocyte mediated immunity	13	0.000153263	10.744	0.02	Biological Process	GO:0002444	myeloid leukocyte mediated immunity	0.000153263	0.000511003	0	0	13	647
GO:0051928 positive regulation of calcium ion transport	6	0.000154017	4.959	0.045	Biological Process	GO:0051928	positive regulation of calcium ion transport	0.000154017	0.000513201	0	0	6	132
GO:0005829 cytosol	51	8.95E-05	41.803	0.009	Cellular Component	GO:0005829	cytosol	8.95E-05	0.000515955	0	0	51	5500
GO:0070491 repressing transcription factor binding	5	7.02E-05	4.098	0.07	Molecular Function	GO:0070491	repressing transcription factor binding	7.02E-05	0.000523108	0	0	5	71
GO:0090311 regulation of protein deacetylation	4	0.000157982	3.306	0.089	Biological Process	GO:0090311	regulation of protein deacetylation	0.000157982	0.000525763	0	0	4	45
GO:1903053 regulation of extracellular matrix organization	4	0.000157982	3.306	0.089	Biological Process	GO:1903053	regulation of extracellular matrix organization	0.000157982	0.000525763	0	0	4	45
GO:0007045 cell-substrate adherens junction assembly	5	0.000158712	4.132	0.06	Biological Process	GO:0007045	cell-substrate adherens junction assembly	0.000158712	0.000527541	0	0	5	84
GO:0048041 focal adhesion assembly	5	0.000158712	4.132	0.06	Biological Process	GO:0048041	focal adhesion assembly	0.000158712	0.000527541	0	0	5	84
GO:0006644 phospholipid metabolic process	11	0.000164264	9.091	0.023	Biological Process	GO:0006644	phospholipid metabolic process	0.000164264	0.000545661	0	0	11	480
GO:0048639 positive regulation of developmental growth	7	0.000165795	5.785	0.037	Biological Process	GO:0048639	positive regulation of developmental growth	0.000165795	0.000550131	0	0	7	191
GO:0031065 positive regulation of histone deacetylation	3	0.000165916	2.479	0.167	Biological Process	GO:0031065	positive regulation of histone deacetylation	0.000165916	0.000550131	0	0	3	18
GO:0031998 regulation of fatty acid beta-oxidation	3	0.000165916	2.479	0.167	Biological Process	GO:0031998	regulation of fatty acid beta-oxidation	0.000165916	0.000550131	0	0	3	18
GO:0015373 anion:sodium symporter activity	3	7.46E-05	2.459	0.214	Molecular Function	GO:0015373	anion:sodium symporter activity	7.46E-05	0.000550132	0	0	3	14
GO:0032609 interferon-gamma production	6	0.000167204	4.959	0.045	Biological Process	GO:0032609	interferon-gamma production	0.000167204	0.000554063	0	0	6	134
GO:0090049 regulation of cell migration involved in sprouting angiogenesis	5	0.000167821	4.132	0.059	Biological Process	GO:0090049	regulation of cell migration involved in sprouting angiogenesis	0.000167821	0.000555085	0	0	5	85
GO:1904705 regulation of vascular smooth muscle cell proliferation	5	0.000167821	4.132	0.059	Biological Process	GO:1904705	regulation of vascular smooth muscle cell proliferation	0.000167821	0.000555085	0	0	5	85
GO:1990874 vascular smooth muscle cell proliferation	5	0.000167821	4.132	0.059	Biological Process	GO:1990874	vascular smooth muscle cell proliferation	0.000167821	0.000555085	0	0	5	85
GO:0002040 sprouting angiogenesis	7	0.000171215	5.785	0.036	Biological Process	GO:0002040	sprouting angiogenesis	0.000171215	0.000565963	0	0	7	192
GO:0002443 leukocyte mediated immunity	18	0.000172023	14.876	0.016	Biological Process	GO:0002443	leukocyte mediated immunity	0.000172023	0.000568247	0	0	18	1139
GO:0032309 icosanoid secretion	4	0.000172222	3.306	0.087	Biological Process	GO:0032309	icosanoid secretion	0.000172222	0.000568247	0	0	4	46
GO:0038084 vascular endothelial growth factor signaling pathway	4	0.000172222	3.306	0.087	Biological Process	GO:0038084	vascular endothelial growth factor signaling pathway	0.000172222	0.000568247	0	0	4	46
GO:0072522 purine-containing compound biosynthetic process	9	0.000172468	7.438	0.028	Biological Process	GO:0072522	purine-containing compound biosynthetic process	0.000172468	0.000568714	0	0	9	327
GO:0006631 fatty acid metabolic process	10	0.000173989	8.264	0.025	Biological Process	GO:0006631	fatty acid metabolic process	0.000173989	0.000573378	0	0	10	403
GO:0071560 cellular response to transforming growth factor beta stimulus	8	0.000174162	6.612	0.031	Biological Process	GO:0071560	cellular response to transforming growth factor beta stimulus	0.000174162	0.000573598	0	0	8	257
GO:0046902 regulation of mitochondrial membrane permeability	5	0.000177324	4.132	0.058	Biological Process	GO:0046902	regulation of mitochondrial membrane permeability	0.000177324	0.000583657	0	0	5	86
GO:0008637 apoptotic mitochondrial changes	6	0.000181269	4.959	0.044	Biological Process	GO:0008637	apoptotic mitochondrial changes	0.000181269	0.000596276	0	0	6	136
GO:0042593 glucose homeostasis	8	0.000183614	6.612	0.031	Biological Process	GO:0042593	glucose homeostasis	0.000183614	0.000603622	0	0	8	259
GO:0010507 negative regulation of autophagy	5	0.000187233	4.132	0.057	Biological Process	GO:0010507	negative regulation of autophagy	0.000187233	0.00061334	0	0	5	87
GO:0031018 endocrine pancreas development	4	0.000187365	3.306	0.085	Biological Process	GO:0031018	endocrine pancreas development	0.000187365	0.00061334	0	0	4	47
GO:0033628 regulation of cell adhesion mediated by integrin	4	0.000187365	3.306	0.085	Biological Process	GO:0033628	regulation of cell adhesion mediated by integrin	0.000187365	0.00061334	0	0	4	47
GO:0034105 positive regulation of tissue remodeling	4	0.000187365	3.306	0.085	Biological Process	GO:0034105	positive regulation of tissue remodeling	0.000187365	0.00061334	0	0	4	47
GO:0035196 production of miRNAs involved in gene silencing by miRNA	4	0.000187365	3.306	0.085	Biological Process	GO:0035196	production of miRNAs involved in gene silencing by miRNA	0.000187365	0.00061334	0	0	4	47
GO:0045540 regulation of cholesterol biosynthetic process	4	0.000187365	3.306	0.085	Biological Process	GO:0045540	regulation of cholesterol biosynthetic process	0.000187365	0.00061334	0	0	4	47
GO:0106118 regulation of sterol biosynthetic process	4	0.000187365	3.306	0.085	Biological Process	GO:0106118	regulation of sterol biosynthetic process	0.000187365	0.00061334	0	0	4	47
GO:0009156 ribonucleoside monophosphate biosynthetic process	7	0.000188342	5.785	0.036	Biological Process	GO:0009156	ribonucleoside monophosphate biosynthetic process	0.000188342	0.000616162	0	0	7	195
GO:0033500 carbohydrate homeostasis	8	0.000188495	6.612	0.031	Biological Process	GO:0033500	carbohydrate homeostasis	0.000188495	0.000616292	0	0	8	260
GO:0032612 interleukin-1 production	6	0.000188643	4.959	0.044	Biological Process	GO:0032612	interleukin-1 production	0.000188643	0.000616401	0	0	6	137
GO:0009055 electron transfer activity	6	8.55E-05	4.918	0.05	Molecular Function	GO:0009055	electron transfer activity	8.55E-05	0.000623628	0	0	6	119
GO:0032559 adenyl ribonucleotide binding	24	8.70E-05	19.672	0.014	Molecular Function	GO:0032559	adenyl ribonucleotide binding	8.70E-05	0.000628342	0	0	24	1722
GO:0071453 cellular response to oxygen levels	8	0.000193483	6.612	0.031	Biological Process	GO:0071453	cellular response to oxygen levels	0.000193483	0.000631835	0	0	8	261
GO:0042169 SH2 domain binding	4	8.85E-05	3.279	0.103	Molecular Function	GO:0042169	SH2 domain binding	8.85E-05	0.000632672	0	0	4	39
GO:0010544 negative regulation of platelet activation	3	0.000196154	2.479	0.158	Biological Process	GO:0010544	negative regulation of platelet activation	0.000196154	0.00064017	0	0	3	19
GO:1905114 cell surface receptor signaling pathway involved in cell-cell signaling	13	0.000197554	10.744	0.02	Biological Process	GO:1905114	cell surface receptor signaling pathway involved in cell-cell signaling	0.000197554	0.000643975	0	0	13	664
GO:0001942 hair follicle development	5	0.000197559	4.132	0.057	Biological Process	GO:0001942	hair follicle development	0.000197559	0.000643975	0	0	5	88
GO:0010181 FMN binding	3	9.28E-05	2.459	0.2	Molecular Function	GO:0010181	FMN binding	9.28E-05	0.000656401	0	0	3	15
GO:0072594 establishment of protein localization to organelle	12	0.000202831	9.917	0.021	Biological Process	GO:0072594	establishment of protein localization to organelle	0.000202831	0.00066076	0	0	12	577
GO:0010799 regulation of peptidyl-threonine phosphorylation	4	0.000203446	3.306	0.083	Biological Process	GO:0010799	regulation of peptidyl-threonine phosphorylation	0.000203446	0.000661569	0	0	4	48
GO:0045912 negative regulation of carbohydrate metabolic process	4	0.000203446	3.306	0.083	Biological Process	GO:0045912	negative regulation of carbohydrate metabolic process	0.000203446	0.000661569	0	0	4	48
GO:0060711 labyrinthine layer development	4	0.000203446	3.306	0.083	Biological Process	GO:0060711	labyrinthine layer development	0.000203446	0.000661569	0	0	4	48
GO:0030554 adenyl nucleotide binding	24	9.61E-05	19.672	0.014	Molecular Function	GO:0030554	adenyl nucleotide binding	9.61E-05	0.000672535	0	0	24	1733
GO:1903047 mitotic cell cycle process	16	0.000207813	13.223	0.017	Biological Process	GO:1903047	mitotic cell cycle process	0.000207813	0.000675055	0	0	16	953
GO:0009165 nucleotide biosynthetic process	10	0.000207844	8.264	0.024	Biological Process	GO:0009165	nucleotide biosynthetic process	0.000207844	0.000675055	0	0	10	412
GO:0071559 response to transforming growth factor beta	8	0.000209103	6.612	0.03	Biological Process	GO:0071559	response to transforming growth factor beta	0.000209103	0.000678736	0	0	8	264
GO:0042826 histone deacetylase binding	6	9.81E-05	4.918	0.049	Molecular Function	GO:0042826	histone deacetylase binding	9.81E-05	0.000679674	0	0	6	122
GO:0001996 positive regulation of heart rate by epinephrine-norepinephrine	2	0.00021695	1.653	0.5	Biological Process	GO:0001996	positive regulation of heart rate by epinephrine-norepinephrine	0.00021695	0.000699162	0	0	2	4
GO:0010746 regulation of plasma membrane long-chain fatty acid transport	2	0.00021695	1.653	0.5	Biological Process	GO:0010746	regulation of plasma membrane long-chain fatty acid transport	0.00021695	0.000699162	0	0	2	4
GO:0010748 negative regulation of plasma membrane long-chain fatty acid transport	2	0.00021695	1.653	0.5	Biological Process	GO:0010748	negative regulation of plasma membrane long-chain fatty acid transport	0.00021695	0.000699162	0	0	2	4
GO:0014900 muscle hyperplasia	2	0.00021695	1.653	0.5	Biological Process	GO:0014900	muscle hyperplasia	0.00021695	0.000699162	0	0	2	4
GO:0019740 nitrogen utilization	2	0.00021695	1.653	0.5	Biological Process	GO:0019740	nitrogen utilization	0.00021695	0.000699162	0	0	2	4
GO:0032079 positive regulation of endodeoxyribonuclease activity	2	0.00021695	1.653	0.5	Biological Process	GO:0032079	positive regulation of endodeoxyribonuclease activity	0.00021695	0.000699162	0	0	2	4
GO:0033590 response to cobalamin	2	0.00021695	1.653	0.5	Biological Process	GO:0033590	response to cobalamin	0.00021695	0.000699162	0	0	2	4
GO:0034465 response to carbon monoxide	2	0.00021695	1.653	0.5	Biological Process	GO:0034465	response to carbon monoxide	0.00021695	0.000699162	0	0	2	4
GO:0038189 neuropilin signaling pathway	2	0.00021695	1.653	0.5	Biological Process	GO:0038189	neuropilin signaling pathway	0.00021695	0.000699162	0	0	2	4
GO:0072367 regulation of lipid transport by regulation of transcription from RNA polymerase II promoter	2	0.00021695	1.653	0.5	Biological Process	GO:0072367	regulation of lipid transport by regulation of transcription from RNA polymerase II promoter	0.00021695	0.000699162	0	0	2	4
GO:0097296 activation of cysteine-type endopeptidase activity involved in apoptotic signaling pathway	2	0.00021695	1.653	0.5	Biological Process	GO:0097296	activation of cysteine-type endopeptidase activity involved in apoptotic signaling pathway	0.00021695	0.000699162	0	0	2	4
GO:1990009 retinal cell apoptotic process	2	0.00021695	1.653	0.5	Biological Process	GO:1990009	retinal cell apoptotic process	0.00021695	0.000699162	0	0	2	4
GO:0042277 peptide binding	10	0.000105071	8.197	0.026	Molecular Function	GO:0042277	peptide binding	0.000105071	0.000699994	0	0	10	380
GO:0047485 protein N-terminus binding	6	0.000107304	4.918	0.048	Molecular Function	GO:0047485	protein N-terminus binding	0.000107304	0.000699994	0	0	6	124
GO:0004104 cholinesterase activity	2	0.000108162	1.639	0.667	Molecular Function	GO:0004104	cholinesterase activity	0.000108162	0.000699994	0	0	2	3
GO:0004517 nitric-oxide synthase activity	2	0.000108162	1.639	0.667	Molecular Function	GO:0004517	nitric-oxide synthase activity	0.000108162	0.000699994	0	0	2	3
GO:0050692 DBD domain binding	2	0.000108162	1.639	0.667	Molecular Function	GO:0050692	DBD domain binding	0.000108162	0.000699994	0	0	2	3
GO:0051425 PTB domain binding	2	0.000108162	1.639	0.667	Molecular Function	GO:0051425	PTB domain binding	0.000108162	0.000699994	0	0	2	3
GO:0055056 D-glucose transmembrane transporter activity	2	0.000108162	1.639	0.667	Molecular Function	GO:0055056	D-glucose transmembrane transporter activity	0.000108162	0.000699994	0	0	2	3
GO:0022404 molting cycle process	5	0.000219507	4.132	0.056	Biological Process	GO:0022404	molting cycle process	0.000219507	0.000705718	0	0	5	90
GO:0022405 hair cycle process	5	0.000219507	4.132	0.056	Biological Process	GO:0022405	hair cycle process	0.000219507	0.000705718	0	0	5	90
GO:0042475 odontogenesis of dentin-containing tooth	5	0.000219507	4.132	0.056	Biological Process	GO:0042475	odontogenesis of dentin-containing tooth	0.000219507	0.000705718	0	0	5	90
GO:2001169 regulation of ATP biosynthetic process	5	0.000219507	4.132	0.056	Biological Process	GO:2001169	regulation of ATP biosynthetic process	0.000219507	0.000705718	0	0	5	90
GO:0099504 synaptic vesicle cycle	7	0.000219947	5.785	0.035	Biological Process	GO:0099504	synaptic vesicle cycle	0.000219947	0.000706709	0	0	7	200
GO:0014075 response to amine	4	0.000220499	3.306	0.082	Biological Process	GO:0014075	response to amine	0.000220499	0.000708062	0	0	4	49
GO:0004953 icosanoid receptor activity	3	0.00011373	2.459	0.188	Molecular Function	GO:0004953	icosanoid receptor activity	0.00011373	0.000722398	0	0	3	16
GO:0005123 death receptor binding	3	0.00011373	2.459	0.188	Molecular Function	GO:0005123	death receptor binding	0.00011373	0.000722398	0	0	3	16
GO:1901293 nucleoside phosphate biosynthetic process	10	0.000228936	8.264	0.024	Biological Process	GO:1901293	nucleoside phosphate biosynthetic process	0.000228936	0.000732976	0	0	10	417
GO:0008584 male gonad development	6	0.000229145	4.959	0.042	Biological Process	GO:0008584	male gonad development	0.000229145	0.000732976	0	0	6	142
GO:0034754 cellular hormone metabolic process	6	0.000229145	4.959	0.042	Biological Process	GO:0034754	cellular hormone metabolic process	0.000229145	0.000732976	0	0	6	142
GO:0007625 grooming behavior	3	0.000229751	2.479	0.15	Biological Process	GO:0007625	grooming behavior	0.000229751	0.000732976	0	0	3	20
GO:0032225 regulation of synaptic transmission, dopaminergic	3	0.000229751	2.479	0.15	Biological Process	GO:0032225	regulation of synaptic transmission, dopaminergic	0.000229751	0.000732976	0	0	3	20
GO:0042053 regulation of dopamine metabolic process	3	0.000229751	2.479	0.15	Biological Process	GO:0042053	regulation of dopamine metabolic process	0.000229751	0.000732976	0	0	3	20
GO:0042069 regulation of catecholamine metabolic process	3	0.000229751	2.479	0.15	Biological Process	GO:0042069	regulation of catecholamine metabolic process	0.000229751	0.000732976	0	0	3	20
GO:0045780 positive regulation of bone resorption	3	0.000229751	2.479	0.15	Biological Process	GO:0045780	positive regulation of bone resorption	0.000229751	0.000732976	0	0	3	20
GO:0046852 positive regulation of bone remodeling	3	0.000229751	2.479	0.15	Biological Process	GO:0046852	positive regulation of bone remodeling	0.000229751	0.000732976	0	0	3	20
GO:0060749 mammary gland alveolus development	3	0.000229751	2.479	0.15	Biological Process	GO:0060749	mammary gland alveolus development	0.000229751	0.000732976	0	0	3	20
GO:0061377 mammary gland lobule development	3	0.000229751	2.479	0.15	Biological Process	GO:0061377	mammary gland lobule development	0.000229751	0.000732976	0	0	3	20
GO:0070542 response to fatty acid	5	0.000231154	4.132	0.055	Biological Process	GO:0070542	response to fatty acid	0.000231154	0.000736147	0	0	5	91
GO:0098773 skin epidermis development	5	0.000231154	4.132	0.055	Biological Process	GO:0098773	skin epidermis development	0.000231154	0.000736147	0	0	5	91
GO:2000106 regulation of leukocyte apoptotic process	5	0.000231154	4.132	0.055	Biological Process	GO:2000106	regulation of leukocyte apoptotic process	0.000231154	0.000736147	0	0	5	91
GO:0046700 heterocycle catabolic process	14	0.000232255	11.57	0.018	Biological Process	GO:0046700	heterocycle catabolic process	0.000232255	0.000739217	0	0	14	768
GO:0046546 development of primary male sexual characteristics	6	0.00023801	4.959	0.042	Biological Process	GO:0046546	development of primary male sexual characteristics	0.00023801	0.000757087	0	0	6	143
GO:0071715 icosanoid transport	4	0.000238557	3.306	0.08	Biological Process	GO:0071715	icosanoid transport	0.000238557	0.000757933	0	0	4	50
GO:1901571 fatty acid derivative transport	4	0.000238557	3.306	0.08	Biological Process	GO:1901571	fatty acid derivative transport	0.000238557	0.000757933	0	0	4	50
GO:0033613 activating transcription factor binding	5	0.00012405	4.098	0.062	Molecular Function	GO:0033613	activating transcription factor binding	0.00012405	0.000780718	0	0	5	80
GO:0003677 DNA binding	32	0.000126443	26.23	0.012	Molecular Function	GO:0003677	DNA binding	0.000126443	0.000788545	0	0	32	2722
GO:0032553 ribonucleotide binding	27	0.000129938	22.131	0.013	Molecular Function	GO:0032553	ribonucleotide binding	0.000129938	0.000803039	0	0	27	2116
GO:0098691 dopaminergic synapse	3	0.000141438	2.459	0.167	Cellular Component	GO:0098691	dopaminergic synapse	0.000141438	0.000805365	0	0	3	18
GO:0034333 adherens junction assembly	5	0.000255853	4.132	0.054	Biological Process	GO:0034333	adherens junction assembly	0.000255853	0.00081204	0	0	5	93
GO:0033673 negative regulation of kinase activity	8	0.000255887	6.612	0.029	Biological Process	GO:0033673	negative regulation of kinase activity	0.000255887	0.00081204	0	0	8	272
GO:1903670 regulation of sprouting angiogenesis	6	0.000256549	4.959	0.041	Biological Process	GO:1903670	regulation of sprouting angiogenesis	0.000256549	0.000813661	0	0	6	145
GO:0010718 positive regulation of epithelial to mesenchymal transition	4	0.000257654	3.306	0.078	Biological Process	GO:0010718	positive regulation of epithelial to mesenchymal transition	0.000257654	0.00081525	0	0	4	51
GO:0070849 response to epidermal growth factor	4	0.000257654	3.306	0.078	Biological Process	GO:0070849	response to epidermal growth factor	0.000257654	0.00081525	0	0	4	51
GO:1900087 positive regulation of G1/S transition of mitotic cell cycle	4	0.000257654	3.306	0.078	Biological Process	GO:1900087	positive regulation of G1/S transition of mitotic cell cycle	0.000257654	0.00081525	0	0	4	51
GO:1904037 positive regulation of epithelial cell apoptotic process	4	0.000257654	3.306	0.078	Biological Process	GO:1904037	positive regulation of epithelial cell apoptotic process	0.000257654	0.00081525	0	0	4	51
GO:0016491 oxidoreductase activity	15	0.000136342	12.295	0.018	Molecular Function	GO:0016491	oxidoreductase activity	0.000136342	0.000835095	0	0	15	825
GO:0010715 regulation of extracellular matrix disassembly	3	0.000266859	2.479	0.143	Biological Process	GO:0010715	regulation of extracellular matrix disassembly	0.000266859	0.000840926	0	0	3	21
GO:0035162 embryonic hemopoiesis	3	0.000266859	2.479	0.143	Biological Process	GO:0035162	embryonic hemopoiesis	0.000266859	0.000840926	0	0	3	21
GO:0046628 positive regulation of insulin receptor signaling pathway	3	0.000266859	2.479	0.143	Biological Process	GO:0046628	positive regulation of insulin receptor signaling pathway	0.000266859	0.000840926	0	0	3	21
GO:0048148 behavioral response to cocaine	3	0.000266859	2.479	0.143	Biological Process	GO:0048148	behavioral response to cocaine	0.000266859	0.000840926	0	0	3	21
GO:0051023 regulation of immunoglobulin secretion	3	0.000266859	2.479	0.143	Biological Process	GO:0051023	regulation of immunoglobulin secretion	0.000266859	0.000840926	0	0	3	21
GO:0070230 positive regulation of lymphocyte apoptotic process	3	0.000266859	2.479	0.143	Biological Process	GO:0070230	positive regulation of lymphocyte apoptotic process	0.000266859	0.000840926	0	0	3	21
GO:0070932 histone H3 deacetylation	3	0.000266859	2.479	0.143	Biological Process	GO:0070932	histone H3 deacetylation	0.000266859	0.000840926	0	0	3	21
GO:0009124 nucleoside monophosphate biosynthetic process	7	0.000271251	5.785	0.034	Biological Process	GO:0009124	nucleoside monophosphate biosynthetic process	0.000271251	0.000854266	0	0	7	207
GO:0022604 regulation of cell morphogenesis	11	0.000272122	9.091	0.022	Biological Process	GO:0022604	regulation of cell morphogenesis	0.000272122	0.000856509	0	0	11	509
GO:0005524 ATP binding	23	0.000141864	18.852	0.014	Molecular Function	GO:0005524	ATP binding	0.000141864	0.000861228	0	0	23	1664
GO:0005783 endoplasmic reticulum	26	0.000153388	21.311	0.012	Cellular Component	GO:0005783	endoplasmic reticulum	0.000153388	0.000863256	0	0	26	2124
GO:0007569 cell aging	6	0.000276206	4.959	0.041	Biological Process	GO:0007569	cell aging	0.000276206	0.000868351	0	0	6	147
GO:0031056 regulation of histone modification	6	0.000276206	4.959	0.041	Biological Process	GO:0031056	regulation of histone modification	0.000276206	0.000868351	0	0	6	147
GO:0022402 cell cycle process	21	0.000276886	17.355	0.014	Biological Process	GO:0022402	cell cycle process	0.000276886	0.000869982	0	0	21	1510
GO:0001954 positive regulation of cell-matrix adhesion	4	0.000277826	3.306	0.077	Biological Process	GO:0001954	positive regulation of cell-matrix adhesion	0.000277826	0.000871414	0	0	4	52
GO:0044003 modification by symbiont of host morphology or physiology	4	0.000277826	3.306	0.077	Biological Process	GO:0044003	modification by symbiont of host morphology or physiology	0.000277826	0.000871414	0	0	4	52
GO:0051972 regulation of telomerase activity	4	0.000277826	3.306	0.077	Biological Process	GO:0051972	regulation of telomerase activity	0.000277826	0.000871414	0	0	4	52
GO:0010975 regulation of neuron projection development	11	0.00028137	9.091	0.022	Biological Process	GO:0010975	regulation of neuron projection development	0.00028137	0.000882017	0	0	11	511
GO:0072330 monocarboxylic acid biosynthetic process	9	0.000285257	7.438	0.026	Biological Process	GO:0072330	monocarboxylic acid biosynthetic process	0.000285257	0.000893683	0	0	9	350
GO:0051276 chromosome organization	19	0.000285834	15.702	0.015	Biological Process	GO:0051276	chromosome organization	0.000285834	0.000894972	0	0	19	1294
GO:0008270 zinc ion binding	16	0.000150158	13.115	0.017	Molecular Function	GO:0008270	zinc ion binding	0.000150158	0.000903581	0	0	16	929
GO:0030234 enzyme regulator activity	18	0.000153418	14.754	0.016	Molecular Function	GO:0030234	enzyme regulator activity	0.000153418	0.000915174	0	0	18	1132
GO:0022408 negative regulation of cell-cell adhesion	7	0.000295995	5.785	0.033	Biological Process	GO:0022408	negative regulation of cell-cell adhesion	0.000295995	0.000926251	0	0	7	210
GO:0001889 liver development	6	0.000297027	4.959	0.04	Biological Process	GO:0001889	liver development	0.000297027	0.000928942	0	0	6	149
GO:0070231 T cell apoptotic process	4	0.000299107	3.306	0.075	Biological Process	GO:0070231	T cell apoptotic process	0.000299107	0.000934363	0	0	4	53
GO:1900744 regulation of p38MAPK cascade	4	0.000299107	3.306	0.075	Biological Process	GO:1900744	regulation of p38MAPK cascade	0.000299107	0.000934363	0	0	4	53
GO:0048714 positive regulation of oligodendrocyte differentiation	3	0.000307631	2.479	0.136	Biological Process	GO:0048714	positive regulation of oligodendrocyte differentiation	0.000307631	0.00095988	0	0	3	22
GO:0090312 positive regulation of protein deacetylation	3	0.000307631	2.479	0.136	Biological Process	GO:0090312	positive regulation of protein deacetylation	0.000307631	0.00095988	0	0	3	22
GO:2000241 regulation of reproductive process	6	0.00030789	4.959	0.04	Biological Process	GO:2000241	regulation of reproductive process	0.00030789	0.000960133	0	0	6	150
GO:0036473 cell death in response to oxidative stress	5	0.000311219	4.132	0.052	Biological Process	GO:0036473	cell death in response to oxidative stress	0.000311219	0.000968834	0	0	5	97
GO:0044070 regulation of anion transport	5	0.000311219	4.132	0.052	Biological Process	GO:0044070	regulation of anion transport	0.000311219	0.000968834	0	0	5	97
GO:0090559 regulation of membrane permeability	5	0.000311219	4.132	0.052	Biological Process	GO:0090559	regulation of membrane permeability	0.000311219	0.000968834	0	0	5	97
GO:0015377 cation:chloride symporter activity	3	0.000164265	2.459	0.167	Molecular Function	GO:0015377	cation:chloride symporter activity	0.000164265	0.000971426	0	0	3	18
GO:0099003 vesicle-mediated transport in synapse	7	0.000313477	5.785	0.033	Biological Process	GO:0099003	vesicle-mediated transport in synapse	0.000313477	0.000975302	0	0	7	212
GO:0030036 actin cytoskeleton organization	13	0.000315571	10.744	0.019	Biological Process	GO:0030036	actin cytoskeleton organization	0.000315571	0.00098125	0	0	13	697
GO:0030336 negative regulation of cell migration	9	0.000316502	7.438	0.025	Biological Process	GO:0030336	negative regulation of cell migration	0.000316502	0.000983578	0	0	9	355
GO:0050852 T cell receptor signaling pathway	8	0.000318438	6.612	0.028	Biological Process	GO:0050852	T cell receptor signaling pathway	0.000318438	0.000989027	0	0	8	281
GO:0003044 regulation of systemic arterial blood pressure mediated by a chemical signal	4	0.000321532	3.306	0.074	Biological Process	GO:0003044	regulation of systemic arterial blood pressure mediated by a chemical signal	0.000321532	0.000996344	0	0	4	54
GO:0007566 embryo implantation	4	0.000321532	3.306	0.074	Biological Process	GO:0007566	embryo implantation	0.000321532	0.000996344	0	0	4	54
GO:0097366 response to bronchodilator	4	0.000321532	3.306	0.074	Biological Process	GO:0097366	response to bronchodilator	0.000321532	0.000996344	0	0	4	54
GO:1990090 cellular response to nerve growth factor stimulus	4	0.000321532	3.306	0.074	Biological Process	GO:1990090	cellular response to nerve growth factor stimulus	0.000321532	0.000996344	0	0	4	54
GO:0098793 presynapse	11	0.00018029	9.016	0.021	Cellular Component	GO:0098793	presynapse	0.00018029	0.00100299	0	0	11	512
GO:0006163 purine nucleotide metabolic process	12	0.000326608	9.917	0.02	Biological Process	GO:0006163	purine nucleotide metabolic process	0.000326608	0.001011492	0	0	12	608
GO:0006606 protein import into nucleus	6	0.00033055	4.959	0.039	Biological Process	GO:0006606	protein import into nucleus	0.00033055	0.001022525	0	0	6	152
GO:0061008 hepaticobiliary system development	6	0.00033055	4.959	0.039	Biological Process	GO:0061008	hepaticobiliary system development	0.00033055	0.001022525	0	0	6	152
GO:0060485 mesenchyme development	8	0.000333908	6.612	0.028	Biological Process	GO:0060485	mesenchyme development	0.000333908	0.001032322	0	0	8	283
GO:0030029 actin filament-based process	14	0.00033819	11.57	0.018	Biological Process	GO:0030029	actin filament-based process	0.00033819	0.001044962	0	0	14	797
GO:0042129 regulation of T cell proliferation	7	0.000341245	5.785	0.033	Biological Process	GO:0042129	regulation of T cell proliferation	0.000341245	0.0010538	0	0	7	215
GO:0072655 establishment of protein localization to mitochondrion	6	0.000342359	4.959	0.039	Biological Process	GO:0072655	establishment of protein localization to mitochondrion	0.000342359	0.001056634	0	0	6	153
GO:0031625 ubiquitin protein ligase binding	9	0.000180231	7.377	0.027	Molecular Function	GO:0031625	ubiquitin protein ligase binding	0.000180231	0.001056741	0	0	9	330
GO:0033044 regulation of chromosome organization	9	0.000343492	7.438	0.025	Biological Process	GO:0033044	regulation of chromosome organization	0.000343492	0.001059526	0	0	9	359
GO:0048168 regulation of neuronal synaptic plasticity	4	0.000345137	3.306	0.073	Biological Process	GO:0048168	regulation of neuronal synaptic plasticity	0.000345137	0.001063992	0	0	4	55
GO:0006925 inflammatory cell apoptotic process	3	0.000352215	2.479	0.13	Biological Process	GO:0006925	inflammatory cell apoptotic process	0.000352215	0.001082103	0	0	3	23
GO:0031281 positive regulation of cyclase activity	3	0.000352215	2.479	0.13	Biological Process	GO:0031281	positive regulation of cyclase activity	0.000352215	0.001082103	0	0	3	23
GO:1900078 positive regulation of cellular response to insulin stimulus	3	0.000352215	2.479	0.13	Biological Process	GO:1900078	positive regulation of cellular response to insulin stimulus	0.000352215	0.001082103	0	0	3	23
GO:1900273 positive regulation of long-term synaptic potentiation	3	0.000352215	2.479	0.13	Biological Process	GO:1900273	positive regulation of long-term synaptic potentiation	0.000352215	0.001082103	0	0	3	23
GO:1901522 positive regulation of transcription from RNA polymerase II promoter involved in cellular response to chemical stimulus	3	0.000352215	2.479	0.13	Biological Process	GO:1901522	positive regulation of transcription from RNA polymerase II promoter involved in cellular response to chemical stimulus	0.000352215	0.001082103	0	0	3	23
GO:2000637 positive regulation of gene silencing by miRNA	3	0.000352215	2.479	0.13	Biological Process	GO:2000637	positive regulation of gene silencing by miRNA	0.000352215	0.001082103	0	0	3	23
GO:0030534 adult behavior	6	0.000354496	4.959	0.039	Biological Process	GO:0030534	adult behavior	0.000354496	0.001088493	0	0	6	154
GO:0002690 positive regulation of leukocyte chemotaxis	5	0.000358366	4.132	0.05	Biological Process	GO:0002690	positive regulation of leukocyte chemotaxis	0.000358366	0.001097728	0	0	5	100
GO:0003073 regulation of systemic arterial blood pressure	5	0.000358366	4.132	0.05	Biological Process	GO:0003073	regulation of systemic arterial blood pressure	0.000358366	0.001097728	0	0	5	100
GO:0007044 cell-substrate junction assembly	5	0.000358366	4.132	0.05	Biological Process	GO:0007044	cell-substrate junction assembly	0.000358366	0.001097728	0	0	5	100
GO:0001661 conditioned taste aversion	2	0.000360147	1.653	0.4	Biological Process	GO:0001661	conditioned taste aversion	0.000360147	0.001097728	0	0	2	5
GO:0010716 negative regulation of extracellular matrix disassembly	2	0.000360147	1.653	0.4	Biological Process	GO:0010716	negative regulation of extracellular matrix disassembly	0.000360147	0.001097728	0	0	2	5
GO:0010891 negative regulation of sequestering of triglyceride	2	0.000360147	1.653	0.4	Biological Process	GO:0010891	negative regulation of sequestering of triglyceride	0.000360147	0.001097728	0	0	2	5
GO:0014004 microglia differentiation	2	0.000360147	1.653	0.4	Biological Process	GO:0014004	microglia differentiation	0.000360147	0.001097728	0	0	2	5
GO:0015911 plasma membrane long-chain fatty acid transport	2	0.000360147	1.653	0.4	Biological Process	GO:0015911	plasma membrane long-chain fatty acid transport	0.000360147	0.001097728	0	0	2	5
GO:0032077 positive regulation of deoxyribonuclease activity	2	0.000360147	1.653	0.4	Biological Process	GO:0032077	positive regulation of deoxyribonuclease activity	0.000360147	0.001097728	0	0	2	5
GO:0045347 negative regulation of MHC class II biosynthetic process	2	0.000360147	1.653	0.4	Biological Process	GO:0045347	negative regulation of MHC class II biosynthetic process	0.000360147	0.001097728	0	0	2	5
GO:0046666 retinal cell programmed cell death	2	0.000360147	1.653	0.4	Biological Process	GO:0046666	retinal cell programmed cell death	0.000360147	0.001097728	0	0	2	5
GO:0060751 branch elongation involved in mammary gland duct branching	2	0.000360147	1.653	0.4	Biological Process	GO:0060751	branch elongation involved in mammary gland duct branching	0.000360147	0.001097728	0	0	2	5
GO:0061197 fungiform papilla morphogenesis	2	0.000360147	1.653	0.4	Biological Process	GO:0061197	fungiform papilla morphogenesis	0.000360147	0.001097728	0	0	2	5
GO:0061351 neural precursor cell proliferation	6	0.000366968	4.959	0.039	Biological Process	GO:0061351	neural precursor cell proliferation	0.000366968	0.001117885	0	0	6	155
GO:0031638 zymogen activation	4	0.000369957	3.306	0.071	Biological Process	GO:0031638	zymogen activation	0.000369957	0.001125721	0	0	4	56
GO:0048260 positive regulation of receptor-mediated endocytosis	4	0.000369957	3.306	0.071	Biological Process	GO:0048260	positive regulation of receptor-mediated endocytosis	0.000369957	0.001125721	0	0	4	56
GO:0001540 amyloid-beta binding	5	0.000194534	4.098	0.057	Molecular Function	GO:0001540	amyloid-beta binding	0.000194534	0.001130937	0	0	5	88
GO:0000079 regulation of cyclin-dependent protein serine/threonine kinase activity	5	0.000375223	4.132	0.05	Biological Process	GO:0000079	regulation of cyclin-dependent protein serine/threonine kinase activity	0.000375223	0.001140457	0	0	5	101
GO:0007631 feeding behavior	5	0.000375223	4.132	0.05	Biological Process	GO:0007631	feeding behavior	0.000375223	0.001140457	0	0	5	101
GO:0006754 ATP biosynthetic process	6	0.000379781	4.959	0.038	Biological Process	GO:0006754	ATP biosynthetic process	0.000379781	0.001153012	0	0	6	156
GO:0043524 negative regulation of neuron apoptotic process	6	0.000379781	4.959	0.038	Biological Process	GO:0043524	negative regulation of neuron apoptotic process	0.000379781	0.001153012	0	0	6	156
GO:0004715 non-membrane spanning protein tyrosine kinase activity	4	0.000200853	3.279	0.083	Molecular Function	GO:0004715	non-membrane spanning protein tyrosine kinase activity	0.000200853	0.001157861	0	0	4	48
GO:0098662 inorganic cation transmembrane transport	14	0.000388047	11.57	0.017	Biological Process	GO:0098662	inorganic cation transmembrane transport	0.000388047	0.001177447	0	0	14	808
GO:0051783 regulation of nuclear division	7	0.000391886	5.785	0.032	Biological Process	GO:0051783	regulation of nuclear division	0.000391886	0.001188427	0	0	7	220
GO:0060047 heart contraction	8	0.000392962	6.612	0.028	Biological Process	GO:0060047	heart contraction	0.000392962	0.001191021	0	0	8	290
GO:1990089 response to nerve growth factor	4	0.000396028	3.306	0.07	Biological Process	GO:1990089	response to nerve growth factor	0.000396028	0.00119964	0	0	4	57
GO:0051052 regulation of DNA metabolic process	10	0.000396922	8.264	0.022	Biological Process	GO:0051052	regulation of DNA metabolic process	0.000396922	0.001201675	0	0	10	447
GO:0032682 negative regulation of chemokine production	3	0.000400755	2.479	0.125	Biological Process	GO:0032682	negative regulation of chemokine production	0.000400755	0.001209887	0	0	3	24
GO:0051580 regulation of neurotransmitter uptake	3	0.000400755	2.479	0.125	Biological Process	GO:0051580	regulation of neurotransmitter uptake	0.000400755	0.001209887	0	0	3	24
GO:0051882 mitochondrial depolarization	3	0.000400755	2.479	0.125	Biological Process	GO:0051882	mitochondrial depolarization	0.000400755	0.001209887	0	0	3	24
GO:0060148 positive regulation of posttranscriptional gene silencing	3	0.000400755	2.479	0.125	Biological Process	GO:0060148	positive regulation of posttranscriptional gene silencing	0.000400755	0.001209887	0	0	3	24
GO:2001026 regulation of endothelial cell chemotaxis	3	0.000400755	2.479	0.125	Biological Process	GO:2001026	regulation of endothelial cell chemotaxis	0.000400755	0.001209887	0	0	3	24
GO:0034617 tetrahydrobiopterin binding	2	0.000215468	1.639	0.5	Molecular Function	GO:0034617	tetrahydrobiopterin binding	0.000215468	0.00122158	0	0	2	4
GO:0035033 histone deacetylase regulator activity	2	0.000215468	1.639	0.5	Molecular Function	GO:0035033	histone deacetylase regulator activity	0.000215468	0.00122158	0	0	2	4
GO:0017156 calcium ion regulated exocytosis	6	0.000406455	4.959	0.038	Biological Process	GO:0017156	calcium ion regulated exocytosis	0.000406455	0.001225038	0	0	6	158
GO:0060968 regulation of gene silencing	6	0.000406455	4.959	0.038	Biological Process	GO:0060968	regulation of gene silencing	0.000406455	0.001225038	0	0	6	158
GO:0070585 protein localization to mitochondrion	6	0.000406455	4.959	0.038	Biological Process	GO:0070585	protein localization to mitochondrion	0.000406455	0.001225038	0	0	6	158
[truncated: 4,569 more rows]
