# Supplementary material for: Evaluation of the Mechanism of Jiedu Huazhuo Quyu Formula in Treating Wilson's Disease-Associated Liver Fibrosis by Network Pharmacology Analysis and Molecular Dynamics Simulation
Source: Evid Based Complement Alternat Med. 2022 Jun 6;2022:9363131. doi: 10.1155/2022/9363131 (PMC9192323; doi:10.1155/2022/9363131)
Supplement: Supplementary Materials — Supplementary Table 1. Details for each antibody. Supplementary Table 2. Details for compound-putative target network. Supplementary Table 3. Enrichment analysis results of 113 genes. Supplementary Table 4. MCODE and CytoNCA analysis. Supplementary Table 5. Enrichment analysis results of 6 core genes. Supplementary Table 6. Molecular docking results. [file 9363131.f1.zip › 9363131.f1/Supplementary Table 3 KEGG.txt]

id	num	pvalue	per	ratio	class	ID	Descrption	Pvalue	Qvalue	Up	Down	fg_num	bg_num
AGE-RAGE signaling pathway in diabetic complications	28	6.41E-29	25.225	0.246	Human Diseases	ko04933	AGE-RAGE signaling pathway in diabetic complications	6.41E-29	1.54E-26	0	0	28	114
Chagas disease (American trypanosomiasis)	24	7.24E-23	21.622	0.207	Human Diseases	ko05142	Chagas disease (American trypanosomiasis)	7.24E-23	8.72E-21	0	0	24	116
Non-alcoholic fatty liver disease (NAFLD)	27	6.58E-22	24.324	0.152	Human Diseases	ko04932	Non-alcoholic fatty liver disease (NAFLD)	6.58E-22	5.29E-20	0	0	27	178
Insulin resistance	23	6.01E-21	20.721	0.189	Human Diseases	ko04931	Insulin resistance	6.01E-21	3.62E-19	0	0	23	122
Fluid shear stress and atherosclerosis	24	3.86E-20	21.622	0.161	Human Diseases	ko05418	Fluid shear stress and atherosclerosis	3.86E-20	1.86E-18	0	0	24	149
Hepatitis B	24	2.20E-19	21.622	0.15	Human Diseases	ko05161	Hepatitis B	2.20E-19	8.85E-18	0	0	24	160
Hepatitis C	23	3.12E-19	20.721	0.16	Human Diseases	ko05160	Hepatitis C	3.12E-19	1.07E-17	0	0	23	144
Proteoglycans in cancer	26	8.30E-19	23.423	0.124	Human Diseases	ko05205	Proteoglycans in cancer	8.30E-19	2.50E-17	0	0	26	210
MAPK signaling pathway	31	9.43E-19	27.928	0.093	Environmental Information Processing	ko04010	MAPK signaling pathway	9.43E-19	2.53E-17	0	0	31	332
Pathways in cancer	38	1.61E-18	34.234	0.069	Human Diseases	ko05200	Pathways in cancer	1.61E-18	3.87E-17	0	0	38	550
Amoebiasis	20	2.67E-18	18.018	0.189	Human Diseases	ko05146	Amoebiasis	2.67E-18	5.85E-17	0	0	20	106
Pertussis	19	3.30E-18	17.117	0.207	Human Diseases	ko05133	Pertussis	3.30E-18	6.62E-17	0	0	19	92
C-type lectin receptor signaling pathway	20	1.74E-17	18.018	0.172	Organismal Systems	ko04625	C-type lectin receptor signaling pathway	1.74E-17	3.23E-16	0	0	20	116
Apoptosis	22	2.11E-17	19.82	0.144	Cellular Processes	ko04210	Apoptosis	2.11E-17	3.63E-16	0	0	22	153
Toll-like receptor signaling pathway	20	4.91E-17	18.018	0.164	Organismal Systems	ko04620	Toll-like receptor signaling pathway	4.91E-17	7.90E-16	0	0	20	122
Malaria	15	1.56E-16	13.514	0.273	Human Diseases	ko05144	Malaria	1.56E-16	2.35E-15	0	0	15	55
TNF signaling pathway	20	1.79E-16	18.018	0.154	Environmental Information Processing	ko04668	TNF signaling pathway	1.79E-16	2.54E-15	0	0	20	130
T cell receptor signaling pathway	19	2.32E-16	17.117	0.167	Organismal Systems	ko04660	T cell receptor signaling pathway	2.32E-16	3.11E-15	0	0	19	114
IL-17 signaling pathway	18	1.08E-15	16.216	0.17	Organismal Systems	ko04657	IL-17 signaling pathway	1.08E-15	1.36E-14	0	0	18	106
Human cytomegalovirus infection	27	1.13E-15	24.324	0.088	Human Diseases	ko05163	Human cytomegalovirus infection	1.13E-15	1.36E-14	0	0	27	307
Osteoclast differentiation	22	1.66E-15	19.82	0.118	Organismal Systems	ko04380	Osteoclast differentiation	1.66E-15	1.91E-14	0	0	22	187
Type II diabetes mellitus	14	6.52E-15	12.613	0.25	Human Diseases	ko04930	Type II diabetes mellitus	6.52E-15	7.14E-14	0	0	14	56
Adipocytokine signaling pathway	16	1.27E-14	14.414	0.184	Organismal Systems	ko04920	Adipocytokine signaling pathway	1.27E-14	1.33E-13	0	0	16	87
Tuberculosis	24	1.74E-14	21.622	0.093	Human Diseases	ko05152	Tuberculosis	1.74E-14	1.75E-13	0	0	24	259
Legionellosis	15	3.66E-14	13.514	0.195	Human Diseases	ko05134	Legionellosis	3.66E-14	3.53E-13	0	0	15	77
Sphingolipid signaling pathway	18	5.84E-14	16.216	0.136	Environmental Information Processing	ko04071	Sphingolipid signaling pathway	5.84E-14	5.42E-13	0	0	18	132
African trypanosomiasis	12	1.05E-13	10.811	0.286	Human Diseases	ko05143	African trypanosomiasis	1.05E-13	9.36E-13	0	0	12	42
HIF-1 signaling pathway	16	1.73E-13	14.414	0.157	Environmental Information Processing	ko04066	HIF-1 signaling pathway	1.73E-13	1.49E-12	0	0	16	102
Fc epsilon RI signaling pathway	14	1.09E-12	12.613	0.177	Organismal Systems	ko04664	Fc epsilon RI signaling pathway	1.09E-12	9.07E-12	0	0	14	79
EGFR tyrosine kinase inhibitor resistance	14	1.87E-12	12.613	0.171	Human Diseases	ko01521	EGFR tyrosine kinase inhibitor resistance	1.87E-12	1.44E-11	0	0	14	82
Antifolate resistance	11	1.88E-12	9.91	0.275	Human Diseases	ko01523	Antifolate resistance	1.88E-12	1.44E-11	0	0	11	40
Human papillomavirus infection	27	1.91E-12	24.324	0.065	Human Diseases	ko05165	Human papillomavirus infection	1.91E-12	1.44E-11	0	0	27	416
Neurotrophin signaling pathway	16	3.92E-12	14.414	0.129	Organismal Systems	ko04722	Neurotrophin signaling pathway	3.92E-12	2.86E-11	0	0	16	124
Colorectal cancer	14	5.12E-12	12.613	0.159	Human Diseases	ko05210	Colorectal cancer	5.12E-12	3.63E-11	0	0	14	88
Leishmaniasis	17	1.15E-11	15.315	0.11	Human Diseases	ko05140	Leishmaniasis	1.15E-11	7.92E-11	0	0	17	155
Pancreatic cancer	13	1.41E-11	11.712	0.169	Human Diseases	ko05212	Pancreatic cancer	1.41E-11	9.43E-11	0	0	13	77
Toxoplasmosis	19	1.53E-11	17.117	0.092	Human Diseases	ko05145	Toxoplasmosis	1.53E-11	9.97E-11	0	0	19	207
Amyotrophic lateral sclerosis (ALS)	12	2.02E-11	10.811	0.19	Human Diseases	ko05014	Amyotrophic lateral sclerosis (ALS)	2.02E-11	1.28E-10	0	0	12	63
NF-kappa B signaling pathway	15	7.09E-11	13.514	0.118	Environmental Information Processing	ko04064	NF-kappa B signaling pathway	7.09E-11	4.38E-10	0	0	15	127
Thyroid hormone signaling pathway	15	1.11E-10	13.514	0.115	Organismal Systems	ko04919	Thyroid hormone signaling pathway	1.11E-10	6.69E-10	0	0	15	131
Relaxin signaling pathway	15	2.35E-10	13.514	0.109	Organismal Systems	ko04926	Relaxin signaling pathway	2.35E-10	1.38E-09	0	0	15	138
Ras signaling pathway	19	2.51E-10	17.117	0.078	Environmental Information Processing	ko04014	Ras signaling pathway	2.51E-10	1.44E-09	0	0	19	243
RIG-I-like receptor signaling pathway	12	3.25E-10	10.811	0.152	Organismal Systems	ko04622	RIG-I-like receptor signaling pathway	3.25E-10	1.78E-09	0	0	12	79
Chronic myeloid leukemia	12	3.25E-10	10.811	0.152	Human Diseases	ko05220	Chronic myeloid leukemia	3.25E-10	1.78E-09	0	0	12	79
Influenza A	20	3.33E-10	18.018	0.072	Human Diseases	ko05164	Influenza A	3.33E-10	1.79E-09	0	0	20	277
HTLV-I infection	23	6.10E-10	20.721	0.06	Human Diseases	ko05166	HTLV-I infection	6.10E-10	3.20E-09	0	0	23	386
ErbB signaling pathway	12	1.03E-09	10.811	0.138	Environmental Information Processing	ko04012	ErbB signaling pathway	1.03E-09	5.30E-09	0	0	12	87
Non-small cell lung cancer	11	2.35E-09	9.91	0.149	Human Diseases	ko05223	Non-small cell lung cancer	2.35E-09	1.18E-08	0	0	11	74
FoxO signaling pathway	14	2.69E-09	12.613	0.101	Environmental Information Processing	ko04068	FoxO signaling pathway	2.69E-09	1.32E-08	0	0	14	139
Endocrine resistance	13	2.77E-09	11.712	0.112	Human Diseases	ko01522	Endocrine resistance	2.77E-09	1.33E-08	0	0	13	116
NOD-like receptor signaling pathway	16	3.23E-09	14.414	0.083	Organismal Systems	ko04621	NOD-like receptor signaling pathway	3.23E-09	1.52E-08	0	0	16	193
Inflammatiory bowel disease (IBD)	14	4.69E-09	12.613	0.097	Human Diseases	ko05321	Inflammatiory bowel disease (IBD)	4.69E-09	2.17E-08	0	0	14	145
VEGF signaling pathway	10	4.87E-09	9.009	0.164	Environmental Information Processing	ko04370	VEGF signaling pathway	4.87E-09	2.17E-08	0	0	10	61
Endometrial cancer	10	4.87E-09	9.009	0.164	Human Diseases	ko05213	Endometrial cancer	4.87E-09	2.17E-08	0	0	10	61
Alzheimer disease	16	5.04E-09	14.414	0.08	Human Diseases	ko05010	Alzheimer disease	5.04E-09	2.21E-08	0	0	16	199
mTOR signaling pathway	15	5.21E-09	13.514	0.087	Environmental Information Processing	ko04150	mTOR signaling pathway	5.21E-09	2.24E-08	0	0	15	172
Hepatocellular carcinoma	15	8.35E-09	13.514	0.084	Human Diseases	ko05225	Hepatocellular carcinoma	8.35E-09	3.53E-08	0	0	15	178
cAMP signaling pathway	16	9.54E-09	14.414	0.077	Environmental Information Processing	ko04024	cAMP signaling pathway	9.54E-09	3.96E-08	0	0	16	208
Kaposi sarcoma-associated herpesvirus infection	17	1.17E-08	15.315	0.071	Human Diseases	ko05167	Kaposi sarcoma-associated herpesvirus infection	1.17E-08	4.76E-08	0	0	17	241
Central carbon metabolism in cancer	10	1.68E-08	9.009	0.145	Human Diseases	ko05230	Central carbon metabolism in cancer	1.68E-08	6.76E-08	0	0	10	69
Rheumatoid arthritis	15	1.76E-08	13.514	0.08	Human Diseases	ko05323	Rheumatoid arthritis	1.76E-08	6.96E-08	0	0	15	188
Breast cancer	14	1.98E-08	12.613	0.086	Human Diseases	ko05224	Breast cancer	1.98E-08	7.69E-08	0	0	14	162
Prolactin signaling pathway	10	3.37E-08	9.009	0.135	Organismal Systems	ko04917	Prolactin signaling pathway	3.37E-08	1.29E-07	0	0	10	74
Glioma	10	3.84E-08	9.009	0.133	Human Diseases	ko05214	Glioma	3.84E-08	1.45E-07	0	0	10	75
Platinum drug resistance	10	4.38E-08	9.009	0.132	Human Diseases	ko01524	Platinum drug resistance	4.38E-08	1.62E-07	0	0	10	76
Necroptosis	14	5.69E-08	12.613	0.08	Cellular Processes	ko04217	Necroptosis	5.69E-08	2.08E-07	0	0	14	176
PI3K-Akt signaling pathway	20	5.86E-08	18.018	0.053	Environmental Information Processing	ko04151	PI3K-Akt signaling pathway	5.86E-08	2.11E-07	0	0	20	374
Thyroid cancer	8	6.42E-08	7.207	0.186	Human Diseases	ko05216	Thyroid cancer	6.42E-08	2.24E-07	0	0	8	43
Bladder cancer	8	6.42E-08	7.207	0.186	Human Diseases	ko05219	Bladder cancer	6.42E-08	2.24E-07	0	0	8	43
Prostate cancer	11	6.68E-08	9.91	0.109	Human Diseases	ko05215	Prostate cancer	6.68E-08	2.30E-07	0	0	11	101
Gastric cancer	13	1.47E-07	11.712	0.081	Human Diseases	ko05226	Gastric cancer	1.47E-07	5.00E-07	0	0	13	161
TGF-beta signaling pathway	10	2.78E-07	9.009	0.109	Environmental Information Processing	ko04350	TGF-beta signaling pathway	2.78E-07	9.18E-07	0	0	10	92
Hypertrophic cardiomyopathy (HCM)	10	2.78E-07	9.009	0.109	Human Diseases	ko05410	Hypertrophic cardiomyopathy (HCM)	2.78E-07	9.18E-07	0	0	10	92
Estrogen signaling pathway	13	2.98E-07	11.712	0.076	Organismal Systems	ko04915	Estrogen signaling pathway	2.98E-07	9.71E-07	0	0	13	171
Herpes simplex infection	18	3.57E-07	16.216	0.053	Human Diseases	ko05168	Herpes simplex infection	3.57E-07	1.15E-06	0	0	18	341
Hematopoietic cell lineage	13	4.16E-07	11.712	0.074	Organismal Systems	ko04640	Hematopoietic cell lineage	4.16E-07	1.32E-06	0	0	13	176
Melanoma	9	5.39E-07	8.108	0.118	Human Diseases	ko05218	Melanoma	5.39E-07	1.67E-06	0	0	9	76
Rap1 signaling pathway	14	5.40E-07	12.613	0.066	Environmental Information Processing	ko04015	Rap1 signaling pathway	5.40E-07	1.67E-06	0	0	14	211
Dilated cardiomyopathy (DCM)	10	6.12E-07	9.009	0.1	Human Diseases	ko05414	Dilated cardiomyopathy (DCM)	6.12E-07	1.87E-06	0	0	10	100
Prion diseases	7	6.92E-07	6.306	0.175	Human Diseases	ko05020	Prion diseases	6.92E-07	2.08E-06	0	0	7	40
Asthma	10	1.49E-06	9.009	0.091	Human Diseases	ko05310	Asthma	1.49E-06	4.42E-06	0	0	10	110
Acute myeloid leukemia	8	2.50E-06	7.207	0.118	Human Diseases	ko05221	Acute myeloid leukemia	2.50E-06	7.35E-06	0	0	8	68
Focal adhesion	13	3.42E-06	11.712	0.061	Cellular Processes	ko04510	Focal adhesion	3.42E-06	9.94E-06	0	0	13	212
Renal cell carcinoma	8	3.48E-06	7.207	0.113	Human Diseases	ko05211	Renal cell carcinoma	3.48E-06	9.99E-06	0	0	8	71
Salmonella infection	9	4.31E-06	8.108	0.093	Human Diseases	ko05132	Salmonella infection	4.31E-06	1.22E-05	0	0	9	97
Insulin signaling pathway	11	4.45E-06	9.91	0.072	Organismal Systems	ko04910	Insulin signaling pathway	4.45E-06	1.25E-05	0	0	11	153
Allograft rejection	11	4.74E-06	9.91	0.071	Human Diseases	ko05330	Allograft rejection	4.74E-06	1.31E-05	0	0	11	154
Cytokine-cytokine receptor interaction	16	5.17E-06	14.414	0.048	Environmental Information Processing	ko04060	Cytokine-cytokine receptor interaction	5.17E-06	1.41E-05	0	0	16	330
Small cell lung cancer	9	5.55E-06	8.108	0.09	Human Diseases	ko05222	Small cell lung cancer	5.55E-06	1.50E-05	0	0	9	100
Inflammatory mediator regulation of TRP channels	9	6.03E-06	8.108	0.089	Organismal Systems	ko04750	Inflammatory mediator regulation of TRP channels	6.03E-06	1.61E-05	0	0	9	101
Epithelial cell signaling in Helicobacter pylori infection	8	7.12E-06	7.207	0.103	Human Diseases	ko05120	Epithelial cell signaling in Helicobacter pylori infection	7.12E-06	1.89E-05	0	0	8	78
Longevity regulating pathway - multiple species	8	7.83E-06	7.207	0.101	Organismal Systems	ko04213	Longevity regulating pathway - multiple species	7.83E-06	2.05E-05	0	0	8	79
Transcriptional misregulation in cancers	12	8.06E-06	10.811	0.062	Human Diseases	ko05202	Transcriptional misregulation in cancers	8.06E-06	2.09E-05	0	0	12	195
Longevity regulating pathway - mammal	9	8.31E-06	8.108	0.086	Organismal Systems	ko04211	Longevity regulating pathway - mammal	8.31E-06	2.13E-05	0	0	9	105
Type I diabetes mellitus	11	9.76E-06	9.91	0.066	Human Diseases	ko04940	Type I diabetes mellitus	9.76E-06	2.48E-05	0	0	11	166
Choline metabolism in cancer	9	1.13E-05	8.108	0.083	Human Diseases	ko05231	Choline metabolism in cancer	1.13E-05	2.83E-05	0	0	9	109
Chemokine signaling pathway	12	1.48E-05	10.811	0.058	Organismal Systems	ko04062	Chemokine signaling pathway	1.48E-05	3.66E-05	0	0	12	207
Dopaminergic synapse	10	1.49E-05	9.009	0.07	Organismal Systems	ko04728	Dopaminergic synapse	1.49E-05	3.66E-05	0	0	10	142
Measles	10	3.19E-05	9.009	0.065	Human Diseases	ko05162	Measles	3.19E-05	7.76E-05	0	0	10	155
Serotonergic synapse	9	3.40E-05	8.108	0.072	Organismal Systems	ko04726	Serotonergic synapse	3.40E-05	8.20E-05	0	0	9	125
Phospholipase D signaling pathway	10	3.56E-05	9.009	0.064	Environmental Information Processing	ko04072	Phospholipase D signaling pathway	3.56E-05	8.50E-05	0	0	10	157
Gap junction	8	3.85E-05	7.207	0.082	Cellular Processes	ko04540	Gap junction	3.85E-05	9.10E-05	0	0	8	98
AMPK signaling pathway	9	4.37E-05	8.108	0.07	Environmental Information Processing	ko04152	AMPK signaling pathway	4.37E-05	1.02E-04	0	0	9	129
B cell receptor signaling pathway	7	4.64E-05	6.306	0.095	Organismal Systems	ko04662	B cell receptor signaling pathway	4.64E-05	1.08E-04	0	0	7	74
Bile secretion	7	5.06E-05	6.306	0.093	Organismal Systems	ko04976	Bile secretion	5.06E-05	1.16E-04	0	0	7	75
Cocaine addiction	6	5.98E-05	5.405	0.113	Human Diseases	ko05030	Cocaine addiction	5.98E-05	1.36E-04	0	0	6	53
Platelet activation	9	6.24E-05	8.108	0.067	Organismal Systems	ko04611	Platelet activation	6.24E-05	1.40E-04	0	0	9	135
Progesterone-mediated oocyte maturation	8	6.33E-05	7.207	0.076	Organismal Systems	ko04914	Progesterone-mediated oocyte maturation	6.33E-05	1.40E-04	0	0	8	105
MicroRNAs in cancer	10	6.34E-05	9.009	0.06	Human Diseases	ko05206	MicroRNAs in cancer	6.34E-05	1.40E-04	0	0	10	168
Regulation of lipolysis in adipocyte	6	8.19E-05	5.405	0.107	Organismal Systems	ko04923	Regulation of lipolysis in adipocyte	8.19E-05	1.80E-04	0	0	6	56
Parathyroid hormone synthesis, secretion and action	8	0.000135968	7.207	0.068	Organismal Systems	ko04928	Parathyroid hormone synthesis, secretion and action	0.000135968	2.95E-04	0	0	8	117
Th17 cell differentiation	10	0.000148301	9.009	0.054	Organismal Systems	ko04659	Th17 cell differentiation	0.000148301	3.19E-04	0	0	10	186
Calcium signaling pathway	10	0.000169128	9.009	0.053	Environmental Information Processing	ko04020	Calcium signaling pathway	0.000169128	3.61E-04	0	0	10	189
Epstein-Barr virus infection	13	0.000180082	11.712	0.042	Human Diseases	ko05169	Epstein-Barr virus infection	0.000180082	3.81E-04	0	0	13	309
Shigellosis	6	0.000206323	5.405	0.091	Human Diseases	ko05131	Shigellosis	0.000206323	4.32E-04	0	0	6	66
Fc gamma R-mediated phagocytosis	7	0.000227692	6.306	0.074	Organismal Systems	ko04666	Fc gamma R-mediated phagocytosis	0.000227692	4.73E-04	0	0	7	95
GnRH signaling pathway	7	0.000242993	6.306	0.073	Organismal Systems	ko04912	GnRH signaling pathway	0.000242993	5.01E-04	0	0	7	96
Autophagy - animal	8	0.00032887	7.207	0.06	Cellular Processes	ko04140	Autophagy - animal	0.00032887	6.72E-04	0	0	8	133
Amphetamine addiction	6	0.000359063	5.405	0.082	Human Diseases	ko05031	Amphetamine addiction	0.000359063	7.27E-04	0	0	6	73
Apelin signaling pathway	8	0.000487526	7.207	0.057	Environmental Information Processing	ko04371	Apelin signaling pathway	0.000487526	9.79E-04	0	0	8	141
Viral carcinogenesis	11	0.000590041	9.91	0.042	Human Diseases	ko05203	Viral carcinogenesis	0.000590041	1.18E-03	0	0	11	262
Systemic lupus erythematosus	10	0.000704386	9.009	0.044	Human Diseases	ko05322	Systemic lupus erythematosus	0.000704386	1.39E-03	0	0	10	226
Graft-versus-host disease	12	0.000765843	10.811	0.038	Human Diseases	ko05332	Graft-versus-host disease	0.000765843	1.50E-03	0	0	12	314
Alcoholism	9	0.000778707	8.108	0.048	Human Diseases	ko05034	Alcoholism	0.000778707	1.51E-03	0	0	9	189
Apoptosis - multiple species	4	0.000836658	3.604	0.121	Cellular Processes	ko04215	Apoptosis - multiple species	0.000836658	1.61E-03	0	0	4	33
Cholinergic synapse	7	0.00098614	6.306	0.058	Organismal Systems	ko04725	Cholinergic synapse	0.00098614	1.89E-03	0	0	7	121
Neuroactive ligand-receptor interaction	11	0.001474602	9.91	0.038	Environmental Information Processing	ko04080	Neuroactive ligand-receptor interaction	0.001474602	2.80E-03	0	0	11	293
p53 signaling pathway	5	0.00255588	4.505	0.068	Cellular Processes	ko04115	p53 signaling pathway	0.00255588	4.81E-03	0	0	5	73
Natural killer cell mediated cytotoxicity	15	0.003114793	13.514	0.029	Organismal Systems	ko04650	Natural killer cell mediated cytotoxicity	0.003114793	5.82E-03	0	0	15	523
Cellular senescence	11	0.003560768	9.91	0.034	Cellular Processes	ko04218	Cellular senescence	0.003560768	6.60E-03	0	0	11	328
Adherens junction	5	0.003807029	4.505	0.062	Cellular Processes	ko04520	Adherens junction	0.003807029	7.00E-03	0	0	5	80
Vascular smooth muscle contraction	6	0.005734482	5.405	0.048	Organismal Systems	ko04270	Vascular smooth muscle contraction	0.005734482	1.05E-02	0	0	6	125
Jak-STAT signaling pathway	7	0.006066016	6.306	0.042	Environmental Information Processing	ko04630	Jak-STAT signaling pathway	0.006066016	1.10E-02	0	0	7	167
Cell cycle	6	0.006669768	5.405	0.047	Cellular Processes	ko04110	Cell cycle	0.006669768	1.20E-02	0	0	6	129
Notch signaling pathway	4	0.006761913	3.604	0.069	Environmental Information Processing	ko04330	Notch signaling pathway	0.006761913	1.21E-02	0	0	4	58
cGMP - PKG signaling pathway	7	0.007099976	6.306	0.041	Environmental Information Processing	ko04022	cGMP - PKG signaling pathway	0.007099976	1.26E-02	0	0	7	172
Huntington disease	8	0.007302833	7.207	0.037	Human Diseases	ko05016	Huntington disease	0.007302833	1.28E-02	0	0	8	217
Axon guidance	7	0.008760732	6.306	0.039	Organismal Systems	ko04360	Axon guidance	0.008760732	1.53E-02	0	0	7	179
Melanogenesis	5	0.01184334	4.505	0.048	Organismal Systems	ko04916	Melanogenesis	0.01184334	2.05E-02	0	0	5	105
Aldosterone-regulated sodium reabsorption	3	0.01214603	2.703	0.081	Organismal Systems	ko04960	Aldosterone-regulated sodium reabsorption	0.01214603	2.09E-02	0	0	3	37
Glucagon signaling pathway	5	0.01277609	4.505	0.047	Organismal Systems	ko04922	Glucagon signaling pathway	0.01277609	2.18E-02	0	0	5	107
Mitophagy - animal	4	0.0149563	3.604	0.055	Cellular Processes	ko04137	Mitophagy - animal	0.0149563	2.54E-02	0	0	4	73
Oxytocin signaling pathway	6	0.01702424	5.405	0.038	Organismal Systems	ko04921	Oxytocin signaling pathway	0.01702424	2.87E-02	0	0	6	158
Parkinson disease	6	0.01850828	5.405	0.037	Human Diseases	ko05012	Parkinson disease	0.01850828	3.10E-02	0	0	6	161
PPAR signaling pathway	4	0.01946207	3.604	0.051	Organismal Systems	ko03320	PPAR signaling pathway	0.01946207	3.23E-02	0	0	4	79
Th1 and Th2 cell differentiation	6	0.02231132	5.405	0.036	Organismal Systems	ko04658	Th1 and Th2 cell differentiation	0.02231132	3.68E-02	0	0	6	168
Regulation of actin cytoskeleton	7	0.02359502	6.306	0.032	Cellular Processes	ko04810	Regulation of actin cytoskeleton	0.02359502	3.87E-02	0	0	7	218
Carbohydrate digestion and absorption	3	0.02574578	2.703	0.061	Organismal Systems	ko04973	Carbohydrate digestion and absorption	0.02574578	4.19E-02	0	0	3	49
Arginine and proline metabolism	3	0.02856459	2.703	0.059	Metabolism	ko00330	Arginine and proline metabolism	0.02856459	4.62E-02	0	0	3	51
Arginine biosynthesis	2	0.03010322	1.802	0.095	Metabolism	ko00220	Arginine biosynthesis	0.03010322	4.84E-02	0	0	2	21
Complement and coagulation cascades	4	0.03762765	3.604	0.041	Organismal Systems	ko04610	Complement and coagulation cascades	0.03762765	6.01E-02	0	0	4	97
Circadian entrainment	4	0.04009122	3.604	0.04	Organismal Systems	ko04713	Circadian entrainment	0.04009122	6.36E-02	0	0	4	99
Morphine addiction	4	0.04264496	3.604	0.04	Human Diseases	ko05032	Morphine addiction	0.04264496	6.72E-02	0	0	4	101
Signaling pathways regulating pluripotency of stem cells	5	0.04602804	4.505	0.033	Cellular Processes	ko04550	Signaling pathways regulating pluripotency of stem cells	0.04602804	7.20E-02	0	0	5	150
Adrenergic signaling in cardiomyocytes	5	0.0505249	4.505	0.032	Organismal Systems	ko04261	Adrenergic signaling in cardiomyocytes	0.0505249	7.86E-02	0	0	5	154
Basal cell carcinoma	3	0.05263404	2.703	0.046	Human Diseases	ko05217	Basal cell carcinoma	0.05263404	8.13E-02	0	0	3	65
Linoleic acid metabolism	2	0.05783038	1.802	0.067	Metabolism	ko00591	Linoleic acid metabolism	0.05783038	8.88E-02	0	0	2	30
Long-term potentiation	3	0.0629976	2.703	0.043	Organismal Systems	ko04720	Long-term potentiation	0.0629976	9.61E-02	0	0	3	70
Caffeine metabolism	1	0.06352358	0.901	0.2	Metabolism	ko00232	Caffeine metabolism	0.06352358	9.63E-02	0	0	1	5
Cytosolic DNA-sensing pathway	3	0.06738915	2.703	0.042	Organismal Systems	ko04623	Cytosolic DNA-sensing pathway	0.06738915	1.02E-01	0	0	3	72
Cushing syndrome	5	0.06962018	4.505	0.03	Human Diseases	ko04934	Cushing syndrome	0.06962018	1.04E-01	0	0	5	169
Intestinal immune network for IgA production	4	0.07485265	3.604	0.033	Organismal Systems	ko04672	Intestinal immune network for IgA production	0.07485265	1.11E-01	0	0	4	122
Tyrosine metabolism	2	0.08745765	1.802	0.053	Metabolism	ko00350	Tyrosine metabolism	0.08745765	1.29E-01	0	0	2	38
Ferroptosis	2	0.09544884	1.802	0.05	Cellular Processes	ko04216	Ferroptosis	0.09544884	1.40E-01	0	0	2	40
Drug metabolism - other enzymes	3	0.09649498	2.703	0.036	Metabolism	ko00983	Drug metabolism - other enzymes	0.09649498	1.41E-01	0	0	3	84
Metabolism of xenobiotics by cytochrome P450	3	0.104458	2.703	0.034	Metabolism	ko00980	Metabolism of xenobiotics by cytochrome P450	0.104458	1.52E-01	0	0	3	87
Fatty acid degradation	2	0.1120166	1.802	0.045	Metabolism	ko00071	Fatty acid degradation	0.1120166	1.62E-01	0	0	2	44
Chemical carcinogenesis	3	0.1126724	2.703	0.033	Human Diseases	ko05204	Chemical carcinogenesis	0.1126724	1.62E-01	0	0	3	90
Peroxisome	3	0.123995	2.703	0.032	Cellular Processes	ko04146	Peroxisome	0.123995	1.77E-01	0	0	3	94
Hedgehog signaling pathway	2	0.1292647	1.802	0.042	Environmental Information Processing	ko04340	Hedgehog signaling pathway	0.1292647	1.83E-01	0	0	2	48
Ubiquinone and other terpenoid-quinone biosynthesis	1	0.1344926	0.901	0.091	Metabolism	ko00130	Ubiquinone and other terpenoid-quinone biosynthesis	0.1344926	1.90E-01	0	0	1	11
Endocrine and other factor-regulated calcium reabsorption	2	0.1381087	1.802	0.04	Organismal Systems	ko04961	Endocrine and other factor-regulated calcium reabsorption	0.1381087	1.94E-01	0	0	2	50
Ovarian Steroidogenesis	2	0.1425798	1.802	0.039	Organismal Systems	ko04913	Ovarian Steroidogenesis	0.1425798	1.99E-01	0	0	2	51
Primary immunodeficiency	2	0.1516127	1.802	0.038	Human Diseases	ko05340	Primary immunodeficiency	0.1516127	2.10E-01	0	0	2	53
Wnt signaling pathway	4	0.1534595	3.604	0.025	Environmental Information Processing	ko04310	Wnt signaling pathway	0.1534595	2.11E-01	0	0	4	159
Viral myocarditis	4	0.176066	3.604	0.024	Human Diseases	ko05416	Viral myocarditis	0.176066	2.41E-01	0	0	4	168
Vibrio cholerae infection	2	0.1793289	1.802	0.034	Human Diseases	ko05110	Vibrio cholerae infection	0.1793289	2.44E-01	0	0	2	59
Long-term depression	2	0.1840237	1.802	0.033	Organismal Systems	ko04730	Long-term depression	0.1840237	2.49E-01	0	0	2	60
Leukocyte transendothelial migration	3	0.1958877	2.703	0.026	Organismal Systems	ko04670	Leukocyte transendothelial migration	0.1958877	2.62E-01	0	0	3	117
Taste transduction	3	0.1958877	2.703	0.026	Organismal Systems	ko04742	Taste transduction	0.1958877	2.62E-01	0	0	3	117
Renin secretion	2	0.2173232	1.802	0.03	Organismal Systems	ko04924	Renin secretion	0.2173232	2.89E-01	0	0	2	67
Purine metabolism	4	0.2326866	3.604	0.021	Metabolism	ko00230	Purine metabolism	0.2326866	3.08E-01	0	0	4	189
Glycerolipid metabolism	2	0.2365933	1.802	0.028	Metabolism	ko00561	Glycerolipid metabolism	0.2365933	3.12E-01	0	0	2	71
Terpenoid backbone biosynthesis	1	0.2411196	0.901	0.048	Metabolism	ko00900	Terpenoid backbone biosynthesis	0.2411196	3.13E-01	0	0	1	21
Glycolysis / Gluconeogenesis	2	0.2414277	1.802	0.028	Metabolism	ko00010	Glycolysis / Gluconeogenesis	0.2414277	3.13E-01	0	0	2	72
Steroid hormone biosynthesis	2	0.2414277	1.802	0.028	Metabolism	ko00140	Steroid hormone biosynthesis	0.2414277	3.13E-01	0	0	2	72
Oocyte meiosis	3	0.2437119	2.703	0.023	Cellular Processes	ko04114	Oocyte meiosis	0.2437119	3.14E-01	0	0	3	131
Retinol metabolism	2	0.255956	1.802	0.027	Metabolism	ko00830	Retinol metabolism	0.255956	3.28E-01	0	0	2	75
Renin-angiotensin system	1	0.2608276	0.901	0.043	Organismal Systems	ko04614	Renin-angiotensin system	0.2608276	3.33E-01	0	0	1	23
Bacterial invasion of epithelial cells	2	0.2656532	1.802	0.026	Human Diseases	ko05100	Bacterial invasion of epithelial cells	0.2656532	3.37E-01	0	0	2	77
Histidine metabolism	1	0.2704906	0.901	0.042	Metabolism	ko00340	Histidine metabolism	0.2704906	3.41E-01	0	0	1	24
Inositol phosphate metabolism	2	0.2753518	1.802	0.025	Metabolism	ko00562	Inositol phosphate metabolism	0.2753518	3.46E-01	0	0	2	79
alpha-Linolenic acid metabolism	1	0.2894425	0.901	0.038	Metabolism	ko00592	alpha-Linolenic acid metabolism	0.2894425	3.60E-01	0	0	1	26
Folate biosynthesis	1	0.2894425	0.901	0.038	Metabolism	ko00790	Folate biosynthesis	0.2894425	3.60E-01	0	0	1	26
Drug metabolism - cytochrome P450	2	0.2947273	1.802	0.024	Metabolism	ko00982	Drug metabolism - cytochrome P450	0.2947273	3.64E-01	0	0	2	83
Maturity onset diabetes of the young	1	0.3079064	0.901	0.036	Human Diseases	ko04950	Maturity onset diabetes of the young	0.3079064	3.79E-01	0	0	1	28
Ascorbate and aldarate metabolism	1	0.3258947	0.901	0.033	Metabolism	ko00053	Ascorbate and aldarate metabolism	0.3258947	3.99E-01	0	0	1	30
Insulin secretion	2	0.3284432	1.802	0.022	Organismal Systems	ko04911	Insulin secretion	0.3284432	4.00E-01	0	0	2	90
beta-Alanine metabolism	1	0.3347143	0.901	0.032	Metabolism	ko00410	beta-Alanine metabolism	0.3347143	4.03E-01	0	0	1	31
Circadian rhythm	1	0.3347143	0.901	0.032	Organismal Systems	ko04710	Circadian rhythm	0.3347143	4.03E-01	0	0	1	31
Hippo signaling pathway	3	0.3433302	2.703	0.019	Environmental Information Processing	ko04390	Hippo signaling pathway	0.3433302	4.12E-01	0	0	3	159
Autoimmune thyroid disease	3	0.3576446	2.703	0.018	Human Diseases	ko05320	Autoimmune thyroid disease	0.3576446	4.26E-01	0	0	3	163
Fructose and mannose metabolism	1	0.3604929	0.901	0.029	Metabolism	ko00051	Fructose and mannose metabolism	0.3604929	4.26E-01	0	0	1	34
Galactose metabolism	1	0.3604929	0.901	0.029	Metabolism	ko00052	Galactose metabolism	0.3604929	4.26E-01	0	0	1	34
GABAergic synapse	2	0.3711321	1.802	0.02	Organismal Systems	ko04727	GABAergic synapse	0.3711321	4.36E-01	0	0	2	99
Retrograde endocannabinoid signaling	3	0.3754816	2.703	0.018	Organismal Systems	ko04723	Retrograde endocannabinoid signaling	0.3754816	4.38E-01	0	0	3	168
Salivary secretion	2	0.3758141	1.802	0.02	Organismal Systems	ko04970	Salivary secretion	0.3758141	4.38E-01	0	0	2	100
Protein digestion and absorption	2	0.3804822	1.802	0.02	Organismal Systems	ko04974	Protein digestion and absorption	0.3804822	4.41E-01	0	0	2	101
Pentose and glucuronate interconversions	1	0.3852812	0.901	0.027	Metabolism	ko00040	Pentose and glucuronate interconversions	0.3852812	4.44E-01	0	0	1	37
Phosphatidylinositol signaling system	2	0.3990062	1.802	0.019	Environmental Information Processing	ko04070	Phosphatidylinositol signaling system	0.3990062	4.56E-01	0	0	2	105
Antigen processing and presentation	8	0.3993116	7.207	0.015	Organismal Systems	ko04612	Antigen processing and presentation	0.3993116	4.56E-01	0	0	8	536
Tight junction	3	0.4213459	2.703	0.017	Cellular Processes	ko04530	Tight junction	0.4213459	4.78E-01	0	0	3	181
Tryptophan metabolism	1	0.4244963	0.901	0.024	Metabolism	ko00380	Tryptophan metabolism	0.4244963	4.78E-01	0	0	1	42
Pyruvate metabolism	1	0.4244963	0.901	0.024	Metabolism	ko00620	Pyruvate metabolism	0.4244963	4.78E-01	0	0	1	42
Protein processing in endoplasmic reticulum	3	0.4456014	2.703	0.016	Genetic Information Processing	ko04141	Protein processing in endoplasmic reticulum	0.4456014	4.99E-01	0	0	3	188
Glycerophospholipid metabolism	2	0.4529578	1.802	0.017	Metabolism	ko00564	Glycerophospholipid metabolism	0.4529578	5.04E-01	0	0	2	117
Vasopressin-regulated water reabsorption	1	0.4540748	0.901	0.022	Organismal Systems	ko04962	Vasopressin-regulated water reabsorption	0.4540748	5.04E-01	0	0	1	46
Glutamatergic synapse	2	0.4573325	1.802	0.017	Organismal Systems	ko04724	Glutamatergic synapse	0.4573325	5.06E-01	0	0	2	118
Porphyrin and chlorophyll metabolism	1	0.4612309	0.901	0.021	Metabolism	ko00860	Porphyrin and chlorophyll metabolism	0.4612309	5.08E-01	0	0	1	47
Ether lipid metabolism	1	0.4752654	0.901	0.02	Metabolism	ko00565	Ether lipid metabolism	0.4752654	5.18E-01	0	0	1	49
Fat digestion and absorption	1	0.4752654	0.901	0.02	Organismal Systems	ko04975	Fat digestion and absorption	0.4752654	5.18E-01	0	0	1	49
Valine, leucine and isoleucine degradation	1	0.4821461	0.901	0.02	Metabolism	ko00280	Valine, leucine and isoleucine degradation	0.4821461	5.23E-01	0	0	1	50
Mineral absorption	1	0.5152313	0.901	0.018	Organismal Systems	ko04978	Mineral absorption	0.5152313	5.57E-01	0	0	1	55
Glutathione metabolism	1	0.5462206	0.901	0.017	Metabolism	ko00480	Glutathione metabolism	0.5462206	5.88E-01	0	0	1	60
Pathogenic Escherichia coli infection	1	0.5638632	0.901	0.016	Human Diseases	ko05130	Pathogenic Escherichia coli infection	0.5638632	6.04E-01	0	0	1	63
Lysine degradation	1	0.5752455	0.901	0.015	Metabolism	ko00310	Lysine degradation	0.5752455	6.13E-01	0	0	1	65
Arachidonic acid metabolism	1	0.6024296	0.901	0.014	Metabolism	ko00590	Arachidonic acid metabolism	0.6024296	6.40E-01	0	0	1	70
Staphylococcus aureus infection	2	0.6109051	1.802	0.013	Human Diseases	ko05150	Staphylococcus aureus infection	0.6109051	6.46E-01	0	0	2	157
Cortisol synthesis and secretion	1	0.6327831	0.901	0.013	Organismal Systems	ko04927	Cortisol synthesis and secretion	0.6327831	6.66E-01	0	0	1	76
Gastric acid secretion	1	0.6376137	0.901	0.013	Organismal Systems	ko04971	Gastric acid secretion	0.6376137	6.68E-01	0	0	1	77
Thyroid hormone synthesis	1	0.6608384	0.901	0.012	Organismal Systems	ko04918	Thyroid hormone synthesis	0.6608384	6.89E-01	0	0	1	82
Cell adhesion molecules (CAMs)	3	0.6641964	2.703	0.012	Environmental Information Processing	ko04514	Cell adhesion molecules (CAMs)	0.6641964	6.90E-01	0	0	3	260
ECM-receptor interaction	1	0.7256892	0.901	0.01	Environmental Information Processing	ko04512	ECM-receptor interaction	0.7256892	7.51E-01	0	0	1	98
Pancreatic secretion	1	0.7398796	0.901	0.01	Organismal Systems	ko04972	Pancreatic secretion	0.7398796	7.62E-01	0	0	1	102
Aldosterone synthesis and secretion	1	0.7565985	0.901	0.009	Organismal Systems	ko04925	Aldosterone synthesis and secretion	0.7565985	7.76E-01	0	0	1	107
Lysosome	1	0.8410481	0.901	0.007	Cellular Processes	ko04142	Lysosome	0.8410481	8.56E-01	0	0	1	139
Thermogenesis	2	0.8440209	1.802	0.008	Organismal Systems	ko04714	Thermogenesis	0.8440209	8.56E-01	0	0	2	251
Metabolic pathways	15	0.8457583	13.514	0.011	Metabolism	ko01100	Metabolic pathways	0.8457583	8.56E-01	0	0	15	1416
Endocytosis	2	0.9120872	1.802	0.007	Cellular Processes	ko04144	Endocytosis	0.9120872	9.20E-01	0	0	2	305
Phagosome	1	0.9830289	0.901	0.003	Cellular Processes	ko04145	Phagosome	0.9830289	9.87E-01	0	0	1	305
Olfactory transduction	1	0.9993577	0.901	0.002	Organismal Systems	ko04740	Olfactory transduction	0.9993577	9.99E-01	0	0	1	542
