# Supplementary material for: Evaluation of the Mechanism of Jiedu Huazhuo Quyu Formula in Treating Wilson's Disease-Associated Liver Fibrosis by Network Pharmacology Analysis and Molecular Dynamics Simulation
Source: Evid Based Complement Alternat Med. 2022 Jun 6;2022:9363131. doi: 10.1155/2022/9363131 (PMC9192323; doi:10.1155/2022/9363131)
Supplement: Supplementary Materials — Supplementary Table 1. Details for each antibody. Supplementary Table 2. Details for compound-putative target network. Supplementary Table 3. Enrichment analysis results of 113 genes. Supplementary Table 4. MCODE and CytoNCA analysis. Supplementary Table 5. Enrichment analysis results of 6 core genes. Supplementary Table 6. Molecular docking results. [file 9363131.f1.zip › 9363131.f1/Supplementary Table 4 CytoNCA.txt]

Gene	Subgragh	Degree	Eigenvector	Information	LAC	Betweenness	Closeness	Network
CXCL8	6.00E+09	29	0.20341769	14.235751	24.068966	6.9660797	1	29
MAPK1	6.00E+09	29	0.20341769	14.235751	24.068966	6.9660797	1	29
AKT1	6.00E+09	29	0.20341769	14.235751	24.068966	6.9660797	1	29
SRC	6.00E+09	29	0.20341769	14.235751	24.068966	6.9660797	1	29
VEGFA	6.00E+09	29	0.20341769	14.235751	24.068966	6.9660797	1	29
IL6	6.00E+09	29	0.20341769	14.235751	24.068966	6.9660797	1	29
TP53	6.00E+09	29	0.20341754	14.235751	24.068966	6.9660797	1	29
EGF	5.72E+09	28	0.19865653	14.021612	23.785715	5.298418	0.96666664	27.597063
TNF	5.72E+09	28	0.19861108	14.021612	23.785715	5.295121	0.96666664	27.595997
IL1B	5.70E+09	28	0.19834353	14.021612	23.714285	5.53013	0.96666664	27.550585
IL10	5.69E+09	28	0.1981165	14.021612	23.642857	5.6740274	0.96666664	27.496904
CASP3	5.69E+09	28	0.1981165	14.021614	23.642857	5.6740274	0.96666664	27.496904
TGFB1	5.39E+09	27	0.19276467	13.799214	23.25926	4.350071	0.9354839	26.307322
MAPK8	5.38E+09	27	0.19271402	13.799214	23.185184	4.538212	0.9354839	26.202118
EGFR	5.37E+09	27	0.19238043	13.799214	23.11111	4.6315284	0.9354839	26.200783
FOS	5.12E+09	26	0.18795282	13.568067	22.846153	3.191063	0.90625	25.091946
SPP1	5.10E+09	26	0.18758398	13.568067	22.846153	3.0922298	0.90625	25.192009
APP	4.80E+09	25	0.18197475	13.327647	22.16	2.5205185	0.8787879	23.924583
SERPINE1	4.79E+09	25	0.18173757	13.327646	22.32	2.290037	0.8787879	24.188076
ESR1	4.49E+09	24	0.17594601	13.077384	21.666666	1.7289352	0.85294116	23.142864
NOS3	4.47E+09	24	0.17556384	13.077382	21.5	2.025264	0.85294116	22.969835
PPARG	4.44E+09	24	0.17495783	13.077382	21.416666	2.2392046	0.85294116	23.016552
HMOX1	4.07E+09	23	0.16759722	12.816658	20.434782	2.1266146	0.82857144	21.89258
RELA	4.06E+09	23	0.16728914	12.816658	20.52174	2.0130827	0.82857144	22.064774
CASP8	3.51E+09	21	0.15549396	12.261091	19.142857	1.0047747	0.7837838	20.2875
KDR	3.24E+09	20	0.14957663	11.964726	18.5	0.5138571	0.7631579	19.517544
PLAU	2.87E+09	19	0.14068575	11.654843	17.263159	0.76862746	0.74358976	18.264706
F2	2.63E+09	18	0.13469332	11.3305	16.444445	0.5316986	0.725	17.411764
FASLG	2.37E+09	17	0.12787373	10.990653	15.882353	0.1	0.70731705	16.875
NOS2	2.37E+09	17	0.12779105	10.990653	15.882353	0.1	0.70731705	16.875
