# Supplementary material for: Evaluation of the Mechanism of Jiedu Huazhuo Quyu Formula in Treating Wilson's Disease-Associated Liver Fibrosis by Network Pharmacology Analysis and Molecular Dynamics Simulation
Source: Evid Based Complement Alternat Med. 2022 Jun 6;2022:9363131. doi: 10.1155/2022/9363131 (PMC9192323; doi:10.1155/2022/9363131)
Supplement: Supplementary Materials — Supplementary Table 1. Details for each antibody. Supplementary Table 2. Details for compound-putative target network. Supplementary Table 3. Enrichment analysis results of 113 genes. Supplementary Table 4. MCODE and CytoNCA analysis. Supplementary Table 5. Enrichment analysis results of 6 core genes. Supplementary Table 6. Molecular docking results. [file 9363131.f1.zip › 9363131.f1/Supplementary Table 4 MCODE.txt]

SUID	MCODE_Cluster	MCODE_Node_Status	MCODE_Score	name	selected	shared name
72		Unclustered	11.73626374	ABL1	FALSE	ABL1
73		Unclustered	5.490196078	PLCG1	FALSE	PLCG1
75	Cluster 1	Clustered	19.26666667	EGF	TRUE	EGF
77	Cluster 1	Clustered	19.26666667	TP53	TRUE	TP53
79	Cluster 1	Clustered	19.68379447	EGFR	TRUE	EGFR
81	Cluster 1	Clustered	19.34782609	APP	TRUE	APP
83	Cluster 1	Seed	19.82683983	PPARG	TRUE	PPARG
85	Cluster 5	Clustered	14	KIT	FALSE	KIT
87		Unclustered	6	ANPEP	FALSE	ANPEP
89	Cluster 1	Clustered	19.26666667	FOS	TRUE	FOS
91		Unclustered	15.79084967	MMP14	FALSE	MMP14
93		Unclustered	12.42647059	TERT	FALSE	TERT
95	Cluster 1	Clustered	19.26666667	CASP3	TRUE	CASP3
97	Cluster 5	Clustered	14	LCK	FALSE	LCK
99	Cluster 4	Clustered	7.563636364	PRKCD	FALSE	PRKCD
101	Cluster 1	Clustered	19.26666667	IL6	TRUE	IL6
103	Cluster 1	Clustered	19.26666667	VEGFA	TRUE	VEGFA
105	Cluster 1	Clustered	18.3115942	ESR1	TRUE	ESR1
107		Unclustered	5.653846154	EPHB2	FALSE	EPHB2
109	Cluster 1	Clustered	19.26666667	MAPK8	TRUE	MAPK8
111		Unclustered	15.79084967	HDAC1	FALSE	HDAC1
113	Cluster 4	Clustered	7.822222222	NTRK1	FALSE	NTRK1
115	Cluster 1	Clustered	19.26666667	SRC	TRUE	SRC
117	Cluster 3	Clustered	3.794736842	ACHE	FALSE	ACHE
118		Unclustered	5.571428571	PON1	FALSE	PON1
120		Unclustered	2.948717949	SLC6A4	FALSE	SLC6A4
122		Unclustered	5	TYR	FALSE	TYR
124	Cluster 1	Clustered	19.26666667	IL1B	TRUE	IL1B
126	Cluster 1	Clustered	17.90526316	KDR	TRUE	KDR
128		Unclustered	13.26797386	SOD1	FALSE	SOD1
130	Cluster 2	Clustered	4.472727273	SLC6A3	FALSE	SLC6A3
133	Cluster 1	Clustered	19.26666667	TNF	TRUE	TNF
135	Cluster 3	Clustered	3.666666667	ADRA1A	FALSE	ADRA1A
137	Cluster 1	Clustered	15.89542484	F2	TRUE	F2
140	Cluster 3	Clustered	3.777777778	HTR2A	FALSE	HTR2A
143	Cluster 2	Clustered	4.690909091	HTR3A	FALSE	HTR3A
145		Unclustered	2.4	PSEN2	FALSE	PSEN2
147	Cluster 1	Clustered	19.26666667	AKT1	TRUE	AKT1
149		Unclustered	7	CYP3A4	FALSE	CYP3A4
152	Cluster 2	Clustered	4.027777778	HTR1A	FALSE	HTR1A
154	Cluster 2	Clustered	4.464285714	DRD1	FALSE	DRD1
157	Cluster 2	Clustered	4.581818182	DRD2	FALSE	DRD2
159		Unclustered	14.38596491	ADAM17	FALSE	ADAM17
160	Cluster 1	Clustered	19.26666667	MAPK1	TRUE	MAPK1
169	Cluster 1	Clustered	19.26666667	CXCL8	TRUE	CXCL8
174	Cluster 1	Clustered	19.26666667	IL10	TRUE	IL10
183		Unclustered	0	ADH1C	FALSE	ADH1C
184		Unclustered	2	ALDH2	FALSE	ALDH2
187		Unclustered	2.051282051	BCHE	FALSE	BCHE
191	Cluster 1	Clustered	18.54940711	NOS3	TRUE	NOS3
196	Cluster 3	Seed	4	TBXA2R	FALSE	TBXA2R
199		Unclustered	7.563636364	AKR1B1	FALSE	AKR1B1
206		Unclustered	11.65714286	NQO1	FALSE	NQO1
210		Unclustered	5	XDH	FALSE	XDH
215	Cluster 1	Clustered	18.90952381	HMOX1	TRUE	HMOX1
217	Cluster 1	Clustered	19.49275362	TGFB1	TRUE	TGFB1
219	Cluster 1	Clustered	19.68379447	SERPINE1	TRUE	SERPINE1
221		Unclustered	10	CTSD	FALSE	CTSD
224		Unclustered	14.70588235	HSPB1	FALSE	HSPB1
228	Cluster 5	Clustered	12.06535948	SELP	FALSE	SELP
238		Unclustered	3.076923077	HMGCR	FALSE	HMGCR
241	Cluster 4	Seed	8	BRAF	FALSE	BRAF
243	Cluster 4	Clustered	7.644444444	PIK3CB	FALSE	PIK3CB
245		Unclustered	13.88333333	NCF1	FALSE	NCF1
247		Unclustered	8	BAX	FALSE	BAX
250	Cluster 4	Clustered	7.418181818	INSR	FALSE	INSR
258		Unclustered	12.675	HNF4A	FALSE	HNF4A
261		Unclustered	12	SLC2A4	FALSE	SLC2A4
263		Unclustered	2	IMPDH2	FALSE	IMPDH2
265		Unclustered	10.94117647	GSK3B	FALSE	GSK3B
267	Cluster 5	Clustered	13.45098039	PGR	FALSE	PGR
269	Cluster 1	Clustered	15.89542484	NOS2	TRUE	NOS2
271		Unclustered	11.02941176	F3	FALSE	F3
273		Unclustered	3.777777778	NR1I2	FALSE	NR1I2
276	Cluster 2	Seed	5	PTGER3	FALSE	PTGER3
278	Cluster 1	Clustered	17.90526316	CASP8	TRUE	CASP8
280		Unclustered	5	VCP	FALSE	VCP
282		Unclustered	0.666666667	PDE3A	FALSE	PDE3A
284		Unclustered	4	PTPRF	FALSE	PTPRF
286		Unclustered	7.822222222	DPP4	FALSE	DPP4
288		Unclustered	4.761904762	SREBF2	FALSE	SREBF2
291	Cluster 1	Clustered	15.89542484	FASLG	TRUE	FASLG
293	Cluster 5	Clustered	13.88333333	CD40LG	FALSE	CD40LG
295	Cluster 1	Clustered	17	PLAU	TRUE	PLAU
299		Unclustered	10.67647059	AKT2	FALSE	AKT2
302	Cluster 1	Clustered	19.68379447	SPP1	TRUE	SPP1
305	Cluster 1	Clustered	18.81904762	RELA	TRUE	RELA
307		Unclustered	7.418181818	PPARA	FALSE	PPARA
310	Cluster 5	Seed	14.88970588	IGF2	FALSE	IGF2
315		Unclustered	10.94117647	SLC2A1	FALSE	SLC2A1
317		Unclustered	9	RXRA	FALSE	RXRA
319		Unclustered	9.848484848	HDAC2	FALSE	HDAC2
322		Unclustered	4.472727273	NR1H4	FALSE	NR1H4
367		Unclustered	1.4	ECE1	FALSE	ECE1
402		Unclustered	5.833333333	PRKACA	FALSE	PRKACA
428		Unclustered	3	CALCR	FALSE	CALCR
429		Unclustered	3	MC4R	FALSE	MC4R
467		Unclustered	11	RET	FALSE	RET
492		Unclustered	6	COL3A1	FALSE	COL3A1
542		Unclustered	7	SLPI	FALSE	SLPI
550		Unclustered	9.615384615	IL1A	FALSE	IL1A
586		Unclustered	2	STS	FALSE	STS
608		Unclustered	3.733333333	PLA2G2A	FALSE	PLA2G2A
611		Unclustered	2.4	POR	FALSE	POR
613		Unclustered	2.7	EPHX1	FALSE	EPHX1
705		Unclustered	4.464285714	TOP2A	FALSE	TOP2A
762		Unclustered	5	SHBG	FALSE	SHBG
766		Unclustered	4.464285714	THRB	FALSE	THRB
787		Unclustered	2	SERPINA6	FALSE	SERPINA6
833		Unclustered	4	PER2	FALSE	PER2
919		Unclustered	2	NR1H3	FALSE	NR1H3
1151		Unclustered	3	PDE4D	FALSE	PDE4D
1208		Unclustered	0	TNNI3K	FALSE	TNNI3K
