# Supplementary material for: Evaluation of the Mechanism of Jiedu Huazhuo Quyu Formula in Treating Wilson's Disease-Associated Liver Fibrosis by Network Pharmacology Analysis and Molecular Dynamics Simulation
Source: Evid Based Complement Alternat Med. 2022 Jun 6;2022:9363131. doi: 10.1155/2022/9363131 (PMC9192323; doi:10.1155/2022/9363131)
Supplement: Supplementary Materials — Supplementary Table 1. Details for each antibody. Supplementary Table 2. Details for compound-putative target network. Supplementary Table 3. Enrichment analysis results of 113 genes. Supplementary Table 4. MCODE and CytoNCA analysis. Supplementary Table 5. Enrichment analysis results of 6 core genes. Supplementary Table 6. Molecular docking results. [file 9363131.f1.zip › 9363131.f1/Supplementary Table 5 GO.txt]

id	num	pvalue	per	ratio	class	ID	Descrption	Pvalue	Qvalue	Up	Down	fg_num	bg_num
GO:0030335 positive regulation of cell migration	6	5.07E-10	100	0.011	Biological Process	GO:0030335	positive regulation of cell migration	5.07E-10	4.35E-07	0	0	6	566
GO:2000147 positive regulation of cell motility	6	6.44E-10	100	0.01	Biological Process	GO:2000147	positive regulation of cell motility	6.44E-10	4.35E-07	0	0	6	589
GO:0051272 positive regulation of cellular component movement	6	7.57E-10	100	0.01	Biological Process	GO:0051272	positive regulation of cellular component movement	7.57E-10	4.35E-07	0	0	6	605
GO:0040017 positive regulation of locomotion	6	8.86E-10	100	0.01	Biological Process	GO:0040017	positive regulation of locomotion	8.86E-10	4.35E-07	0	0	6	621
GO:0071222 cellular response to lipopolysaccharide	5	1.62E-09	83.333	0.02	Biological Process	GO:0071222	cellular response to lipopolysaccharide	1.62E-09	6.24E-07	0	0	5	246
GO:0071219 cellular response to molecule of bacterial origin	5	1.91E-09	83.333	0.02	Biological Process	GO:0071219	cellular response to molecule of bacterial origin	1.91E-09	6.24E-07	0	0	5	254
GO:0071216 cellular response to biotic stimulus	5	2.95E-09	83.333	0.018	Biological Process	GO:0071216	cellular response to biotic stimulus	2.95E-09	8.27E-07	0	0	5	277
GO:0018105 peptidyl-serine phosphorylation	5	4.47E-09	83.333	0.017	Biological Process	GO:0018105	peptidyl-serine phosphorylation	4.47E-09	1.10E-06	0	0	5	301
GO:0018209 peptidyl-serine modification	5	6.47E-09	83.333	0.015	Biological Process	GO:0018209	peptidyl-serine modification	6.47E-09	1.41E-06	0	0	5	324
GO:0032496 response to lipopolysaccharide	5	1.35E-08	83.333	0.013	Biological Process	GO:0032496	response to lipopolysaccharide	1.35E-08	2.65E-06	0	0	5	375
GO:0030334 regulation of cell migration	6	1.49E-08	100	0.006	Biological Process	GO:0030334	regulation of cell migration	1.49E-08	2.67E-06	0	0	6	993
GO:0002237 response to molecule of bacterial origin	5	1.73E-08	83.333	0.013	Biological Process	GO:0002237	response to molecule of bacterial origin	1.73E-08	2.82E-06	0	0	5	394
GO:2000145 regulation of cell motility	6	2.16E-08	100	0.006	Biological Process	GO:2000145	regulation of cell motility	2.16E-08	3.27E-06	0	0	6	1056
GO:0051270 regulation of cellular component movement	6	3.45E-08	100	0.005	Biological Process	GO:0051270	regulation of cellular component movement	3.45E-08	4.76E-06	0	0	6	1141
GO:0040012 regulation of locomotion	6	3.63E-08	100	0.005	Biological Process	GO:0040012	regulation of locomotion	3.63E-08	4.76E-06	0	0	6	1151
GO:0035295 tube development	6	3.95E-08	100	0.005	Biological Process	GO:0035295	tube development	3.95E-08	4.84E-06	0	0	6	1167
GO:0030879 mammary gland development	4	5.46E-08	66.667	0.025	Biological Process	GO:0030879	mammary gland development	5.46E-08	6.31E-06	0	0	4	157
GO:0034614 cellular response to reactive oxygen species	4	9.46E-08	66.667	0.022	Biological Process	GO:0034614	cellular response to reactive oxygen species	9.46E-08	1.03E-05	0	0	4	180
GO:0034097 response to cytokine	6	1.21E-07	100	0.004	Biological Process	GO:0034097	response to cytokine	1.21E-07	1.20E-05	0	0	6	1406
GO:0050900 leukocyte migration	5	1.22E-07	83.333	0.009	Biological Process	GO:0050900	leukocyte migration	1.22E-07	1.20E-05	0	0	5	583
GO:0002684 positive regulation of immune system process	6	1.76E-07	100	0.004	Biological Process	GO:0002684	positive regulation of immune system process	1.76E-07	1.65E-05	0	0	6	1497
GO:0051094 positive regulation of developmental process	6	1.89E-07	100	0.004	Biological Process	GO:0051094	positive regulation of developmental process	1.89E-07	1.69E-05	0	0	6	1515
GO:0002685 regulation of leukocyte migration	4	2.36E-07	66.667	0.018	Biological Process	GO:0002685	regulation of leukocyte migration	2.36E-07	2.01E-05	0	0	4	226
GO:0071396 cellular response to lipid	5	2.64E-07	83.333	0.007	Biological Process	GO:0071396	cellular response to lipid	2.64E-07	2.14E-05	0	0	5	680
GO:0006935 chemotaxis	5	2.78E-07	83.333	0.007	Biological Process	GO:0006935	chemotaxis	2.78E-07	2.14E-05	0	0	5	687
GO:0042330 taxis	5	2.84E-07	83.333	0.007	Biological Process	GO:0042330	taxis	2.84E-07	2.14E-05	0	0	5	690
GO:0000302 response to reactive oxygen species	4	3.31E-07	66.667	0.016	Biological Process	GO:0000302	response to reactive oxygen species	3.31E-07	2.41E-05	0	0	4	246
GO:0071363 cellular response to growth factor stimulus	5	3.78E-07	83.333	0.007	Biological Process	GO:0071363	cellular response to growth factor stimulus	3.78E-07	2.64E-05	0	0	5	731
GO:0016477 cell migration	6	3.89E-07	100	0.004	Biological Process	GO:0016477	cell migration	3.89E-07	2.64E-05	0	0	6	1708
GO:0070848 response to growth factor	5	4.59E-07	83.333	0.007	Biological Process	GO:0070848	response to growth factor	4.59E-07	3.01E-05	0	0	5	760
GO:0030155 regulation of cell adhesion	5	5.53E-07	83.333	0.006	Biological Process	GO:0030155	regulation of cell adhesion	5.53E-07	3.46E-05	0	0	5	789
GO:0001568 blood vessel development	5	5.64E-07	83.333	0.006	Biological Process	GO:0001568	blood vessel development	5.64E-07	3.46E-05	0	0	5	792
GO:0048870 cell motility	6	6.76E-07	100	0.003	Biological Process	GO:0048870	cell motility	6.76E-07	3.82E-05	0	0	6	1872
GO:0051674 localization of cell	6	6.76E-07	100	0.003	Biological Process	GO:0051674	localization of cell	6.76E-07	3.82E-05	0	0	6	1872
GO:0001944 vasculature development	5	6.99E-07	83.333	0.006	Biological Process	GO:0001944	vasculature development	6.99E-07	3.82E-05	0	0	5	827
GO:0043408 regulation of MAPK cascade	5	6.99E-07	83.333	0.006	Biological Process	GO:0043408	regulation of MAPK cascade	6.99E-07	3.82E-05	0	0	5	827
GO:0072358 cardiovascular system development	5	7.38E-07	83.333	0.006	Biological Process	GO:0072358	cardiovascular system development	7.38E-07	3.92E-05	0	0	5	836
GO:0009617 response to bacterium	5	8.25E-07	83.333	0.006	Biological Process	GO:0009617	response to bacterium	8.25E-07	4.27E-05	0	0	5	855
GO:0061180 mammary gland epithelium development	3	1.01E-06	50	0.04	Biological Process	GO:0061180	mammary gland epithelium development	1.01E-06	5.03E-05	0	0	3	75
GO:0051240 positive regulation of multicellular organismal process	6	1.02E-06	100	0.003	Biological Process	GO:0051240	positive regulation of multicellular organismal process	1.02E-06	5.03E-05	0	0	6	2006
GO:1900182 positive regulation of protein localization to nucleus	3	1.09E-06	50	0.039	Biological Process	GO:1900182	positive regulation of protein localization to nucleus	1.09E-06	5.24E-05	0	0	3	77
GO:0034599 cellular response to oxidative stress	4	1.13E-06	66.667	0.012	Biological Process	GO:0034599	cellular response to oxidative stress	1.13E-06	5.26E-05	0	0	4	334
GO:0071902 positive regulation of protein serine/threonine kinase activity	4	1.37E-06	66.667	0.011	Biological Process	GO:0071902	positive regulation of protein serine/threonine kinase activity	1.37E-06	6.14E-05	0	0	4	351
GO:0002682 regulation of immune system process	6	1.41E-06	100	0.003	Biological Process	GO:0002682	regulation of immune system process	1.41E-06	6.14E-05	0	0	6	2116
GO:0032147 activation of protein kinase activity	4	1.42E-06	66.667	0.011	Biological Process	GO:0032147	activation of protein kinase activity	1.42E-06	6.14E-05	0	0	4	354
GO:0040011 locomotion	6	1.44E-06	100	0.003	Biological Process	GO:0040011	locomotion	1.44E-06	6.14E-05	0	0	6	2123
GO:0035239 tube morphogenesis	5	1.51E-06	83.333	0.005	Biological Process	GO:0035239	tube morphogenesis	1.51E-06	6.29E-05	0	0	5	965
GO:0043154 negative regulation of cysteine-type endopeptidase activity involved in apoptotic process	3	1.76E-06	50	0.033	Biological Process	GO:0043154	negative regulation of cysteine-type endopeptidase activity involved in apoptotic process	1.76E-06	7.18E-05	0	0	3	90
GO:0031175 neuron projection development	5	1.92E-06	83.333	0.005	Biological Process	GO:0031175	neuron projection development	1.92E-06	7.68E-05	0	0	5	1013
GO:0033993 response to lipid	5	1.99E-06	83.333	0.005	Biological Process	GO:0033993	response to lipid	1.99E-06	7.83E-05	0	0	5	1021
GO:0033554 cellular response to stress	6	2.15E-06	100	0.003	Biological Process	GO:0033554	cellular response to stress	2.15E-06	8.13E-05	0	0	6	2270
GO:2000026 regulation of multicellular organismal development	6	2.19E-06	100	0.003	Biological Process	GO:2000026	regulation of multicellular organismal development	2.19E-06	8.13E-05	0	0	6	2276
GO:0000165 MAPK cascade	5	2.19E-06	83.333	0.005	Biological Process	GO:0000165	MAPK cascade	2.19E-06	8.13E-05	0	0	5	1041
GO:0008283 cell proliferation	6	2.24E-06	100	0.003	Biological Process	GO:0008283	cell proliferation	2.24E-06	8.16E-05	0	0	6	2286
GO:0023014 signal transduction by protein phosphorylation	5	2.31E-06	83.333	0.005	Biological Process	GO:0023014	signal transduction by protein phosphorylation	2.31E-06	8.21E-05	0	0	5	1052
GO:2000117 negative regulation of cysteine-type endopeptidase activity	3	2.34E-06	50	0.03	Biological Process	GO:2000117	negative regulation of cysteine-type endopeptidase activity	2.34E-06	8.21E-05	0	0	3	99
GO:0002690 positive regulation of leukocyte chemotaxis	3	2.41E-06	50	0.03	Biological Process	GO:0002690	positive regulation of leukocyte chemotaxis	2.41E-06	8.32E-05	0	0	3	100
GO:0006928 movement of cell or subcellular component	6	2.62E-06	100	0.003	Biological Process	GO:0006928	movement of cell or subcellular component	2.62E-06	8.58E-05	0	0	6	2346
GO:0051050 positive regulation of transport	5	2.62E-06	83.333	0.005	Biological Process	GO:0051050	positive regulation of transport	2.62E-06	8.58E-05	0	0	5	1079
GO:0001934 positive regulation of protein phosphorylation	5	2.70E-06	83.333	0.005	Biological Process	GO:0001934	positive regulation of protein phosphorylation	2.70E-06	8.58E-05	0	0	5	1085
GO:0097011 cellular response to granulocyte macrophage colony-stimulating factor stimulus	2	2.71E-06	33.333	0.222	Biological Process	GO:0097011	cellular response to granulocyte macrophage colony-stimulating factor stimulus	2.71E-06	8.58E-05	0	0	2	9
GO:0097012 response to granulocyte macrophage colony-stimulating factor	2	2.71E-06	33.333	0.222	Biological Process	GO:0097012	response to granulocyte macrophage colony-stimulating factor	2.71E-06	8.58E-05	0	0	2	9
GO:0042327 positive regulation of phosphorylation	5	3.43E-06	83.333	0.004	Biological Process	GO:0042327	positive regulation of phosphorylation	3.43E-06	0.00010693	0	0	5	1139
GO:0033138 positive regulation of peptidyl-serine phosphorylation	3	3.49E-06	50	0.027	Biological Process	GO:0033138	positive regulation of peptidyl-serine phosphorylation	3.49E-06	0.000107102	0	0	3	113
GO:0048608 reproductive structure development	4	3.59E-06	66.667	0.009	Biological Process	GO:0048608	reproductive structure development	3.59E-06	0.000108455	0	0	4	447
GO:0061458 reproductive system development	4	3.72E-06	66.667	0.009	Biological Process	GO:0061458	reproductive system development	3.72E-06	0.000108455	0	0	4	451
GO:0048666 neuron development	5	3.74E-06	83.333	0.004	Biological Process	GO:0048666	neuron development	3.74E-06	0.000108455	0	0	5	1159
GO:0048568 embryonic organ development	4	3.76E-06	66.667	0.009	Biological Process	GO:0048568	embryonic organ development	3.76E-06	0.000108455	0	0	4	452
GO:1902533 positive regulation of intracellular signal transduction	5	3.87E-06	83.333	0.004	Biological Process	GO:1902533	positive regulation of intracellular signal transduction	3.87E-06	0.000110124	0	0	5	1167
GO:0072584 caveolin-mediated endocytosis	2	4.14E-06	33.333	0.182	Biological Process	GO:0072584	caveolin-mediated endocytosis	4.14E-06	0.000114297	0	0	2	11
GO:0060249 anatomical structure homeostasis	4	4.28E-06	66.667	0.009	Biological Process	GO:0060249	anatomical structure homeostasis	4.28E-06	0.000114297	0	0	4	467
GO:0051707 response to other organism	5	4.30E-06	83.333	0.004	Biological Process	GO:0051707	response to other organism	4.30E-06	0.000114297	0	0	5	1192
GO:0043207 response to external biotic stimulus	5	4.33E-06	83.333	0.004	Biological Process	GO:0043207	response to external biotic stimulus	4.33E-06	0.000114297	0	0	5	1194
GO:0048732 gland development	4	4.35E-06	66.667	0.009	Biological Process	GO:0048732	gland development	4.35E-06	0.000114297	0	0	4	469
GO:1900180 regulation of protein localization to nucleus	3	4.40E-06	50	0.025	Biological Process	GO:1900180	regulation of protein localization to nucleus	4.40E-06	0.000114297	0	0	3	122
GO:0045785 positive regulation of cell adhesion	4	4.42E-06	66.667	0.008	Biological Process	GO:0045785	positive regulation of cell adhesion	4.42E-06	0.000114297	0	0	4	471
GO:0072359 circulatory system development	5	4.50E-06	83.333	0.004	Biological Process	GO:0072359	circulatory system development	4.50E-06	0.00011472	0	0	5	1203
GO:0010562 positive regulation of phosphorus metabolic process	5	4.65E-06	83.333	0.004	Biological Process	GO:0010562	positive regulation of phosphorus metabolic process	4.65E-06	0.000115549	0	0	5	1211
GO:0045937 positive regulation of phosphate metabolic process	5	4.65E-06	83.333	0.004	Biological Process	GO:0045937	positive regulation of phosphate metabolic process	4.65E-06	0.000115549	0	0	5	1211
GO:0009607 response to biotic stimulus	5	4.92E-06	83.333	0.004	Biological Process	GO:0009607	response to biotic stimulus	4.92E-06	0.000120792	0	0	5	1225
GO:1901701 cellular response to oxygen-containing compound	5	5.06E-06	83.333	0.004	Biological Process	GO:1901701	cellular response to oxygen-containing compound	5.06E-06	0.000121672	0	0	5	1232
GO:0002688 regulation of leukocyte chemotaxis	3	5.08E-06	50	0.023	Biological Process	GO:0002688	regulation of leukocyte chemotaxis	5.08E-06	0.000121672	0	0	3	128
GO:0006979 response to oxidative stress	4	5.56E-06	66.667	0.008	Biological Process	GO:0006979	response to oxidative stress	5.56E-06	0.000130297	0	0	4	499
GO:0035270 endocrine system development	3	5.57E-06	50	0.023	Biological Process	GO:0035270	endocrine system development	5.57E-06	0.000130297	0	0	3	132
GO:0048646 anatomical structure formation involved in morphogenesis	5	5.79E-06	83.333	0.004	Biological Process	GO:0048646	anatomical structure formation involved in morphogenesis	5.79E-06	0.000133822	0	0	5	1266
GO:0051090 regulation of DNA-binding transcription factor activity	4	5.97E-06	66.667	0.008	Biological Process	GO:0051090	regulation of DNA-binding transcription factor activity	5.97E-06	0.0001364	0	0	4	508
GO:0071345 cellular response to cytokine stimulus	5	6.81E-06	83.333	0.004	Biological Process	GO:0071345	cellular response to cytokine stimulus	6.81E-06	0.000152505	0	0	5	1308
GO:0031401 positive regulation of protein modification process	5	6.83E-06	83.333	0.004	Biological Process	GO:0031401	positive regulation of protein modification process	6.83E-06	0.000152505	0	0	5	1309
GO:0018193 peptidyl-amino acid modification	5	7.20E-06	83.333	0.004	Biological Process	GO:0018193	peptidyl-amino acid modification	7.20E-06	0.000157148	0	0	5	1323
GO:0038127 ERBB signaling pathway	3	7.24E-06	50	0.021	Biological Process	GO:0038127	ERBB signaling pathway	7.24E-06	0.000157148	0	0	3	144
GO:0050878 regulation of body fluid levels	4	7.28E-06	66.667	0.007	Biological Process	GO:0050878	regulation of body fluid levels	7.28E-06	0.000157148	0	0	4	534
GO:0009605 response to external stimulus	6	7.39E-06	100	0.002	Biological Process	GO:0009605	response to external stimulus	7.39E-06	0.00015781	0	0	6	2788
GO:0071900 regulation of protein serine/threonine kinase activity	4	7.50E-06	66.667	0.007	Biological Process	GO:0071900	regulation of protein serine/threonine kinase activity	7.50E-06	0.000158389	0	0	4	538
GO:0033135 regulation of peptidyl-serine phosphorylation	3	7.86E-06	50	0.02	Biological Process	GO:0033135	regulation of peptidyl-serine phosphorylation	7.86E-06	0.000159818	0	0	3	148
GO:0050921 positive regulation of chemotaxis	3	7.86E-06	50	0.02	Biological Process	GO:0050921	positive regulation of chemotaxis	7.86E-06	0.000159818	0	0	3	148
GO:0035635 entry of bacterium into host cell	2	7.89E-06	33.333	0.133	Biological Process	GO:0035635	entry of bacterium into host cell	7.89E-06	0.000159818	0	0	2	15
GO:0050930 induction of positive chemotaxis	2	7.89E-06	33.333	0.133	Biological Process	GO:0050930	induction of positive chemotaxis	7.89E-06	0.000159818	0	0	2	15
GO:0048584 positive regulation of response to stimulus	6	8.78E-06	100	0.002	Biological Process	GO:0048584	positive regulation of response to stimulus	8.78E-06	0.000175137	0	0	6	2869
GO:0002687 positive regulation of leukocyte migration	3	8.86E-06	50	0.019	Biological Process	GO:0002687	positive regulation of leukocyte migration	8.86E-06	0.000175137	0	0	3	154
GO:0045860 positive regulation of protein kinase activity	4	8.92E-06	66.667	0.007	Biological Process	GO:0045860	positive regulation of protein kinase activity	8.92E-06	0.000175137	0	0	4	562
GO:0009653 anatomical structure morphogenesis	6	9.21E-06	100	0.002	Biological Process	GO:0009653	anatomical structure morphogenesis	9.21E-06	0.00017911	0	0	6	2892
GO:0050793 regulation of developmental process	6	9.62E-06	100	0.002	Biological Process	GO:0050793	regulation of developmental process	9.62E-06	0.000185229	0	0	6	2913
GO:2000641 regulation of early endosome to late endosome transport	2	1.02E-05	33.333	0.118	Biological Process	GO:2000641	regulation of early endosome to late endosome transport	1.02E-05	0.000194892	0	0	2	17
GO:0030182 neuron differentiation	5	1.04E-05	83.333	0.004	Biological Process	GO:0030182	neuron differentiation	1.04E-05	0.000196403	0	0	5	1425
GO:0014065 phosphatidylinositol 3-kinase signaling	3	1.09E-05	50	0.018	Biological Process	GO:0014065	phosphatidylinositol 3-kinase signaling	1.09E-05	0.000203764	0	0	3	165
GO:0010035 response to inorganic substance	4	1.15E-05	66.667	0.007	Biological Process	GO:0010035	response to inorganic substance	1.15E-05	0.000212718	0	0	4	599
GO:0043410 positive regulation of MAPK cascade	4	1.16E-05	66.667	0.007	Biological Process	GO:0043410	positive regulation of MAPK cascade	1.16E-05	0.000213531	0	0	4	601
GO:0071310 cellular response to organic substance	6	1.18E-05	100	0.002	Biological Process	GO:0071310	cellular response to organic substance	1.18E-05	0.000214671	0	0	6	3015
GO:0030168 platelet activation	3	1.19E-05	50	0.018	Biological Process	GO:0030168	platelet activation	1.19E-05	0.000214671	0	0	3	170
GO:0010634 positive regulation of epithelial cell migration	3	1.21E-05	50	0.018	Biological Process	GO:0010634	positive regulation of epithelial cell migration	1.21E-05	0.000216035	0	0	3	171
GO:0033674 positive regulation of kinase activity	4	1.23E-05	66.667	0.007	Biological Process	GO:0033674	positive regulation of kinase activity	1.23E-05	0.000216035	0	0	4	609
GO:0001525 angiogenesis	4	1.24E-05	66.667	0.007	Biological Process	GO:0001525	angiogenesis	1.24E-05	0.000216035	0	0	4	611
GO:0032879 regulation of localization	6	1.24E-05	100	0.002	Biological Process	GO:0032879	regulation of localization	1.24E-05	0.000216035	0	0	6	3040
GO:0060716 labyrinthine layer blood vessel development	2	1.43E-05	33.333	0.1	Biological Process	GO:0060716	labyrinthine layer blood vessel development	1.43E-05	0.000245905	0	0	2	20
GO:0045321 leukocyte activation	5	1.59E-05	83.333	0.003	Biological Process	GO:0045321	leukocyte activation	1.59E-05	0.000270809	0	0	5	1552
GO:0001932 regulation of protein phosphorylation	5	1.61E-05	83.333	0.003	Biological Process	GO:0001932	regulation of protein phosphorylation	1.61E-05	0.000271908	0	0	5	1556
GO:0120036 plasma membrane bounded cell projection organization	5	1.63E-05	83.333	0.003	Biological Process	GO:0120036	plasma membrane bounded cell projection organization	1.63E-05	0.000273888	0	0	5	1561
GO:0007155 cell adhesion	5	1.65E-05	83.333	0.003	Biological Process	GO:0007155	cell adhesion	1.65E-05	0.000274175	0	0	5	1565
GO:0035556 intracellular signal transduction	6	1.69E-05	100	0.002	Biological Process	GO:0035556	intracellular signal transduction	1.69E-05	0.000274175	0	0	6	3199
GO:0048639 positive regulation of developmental growth	3	1.69E-05	50	0.016	Biological Process	GO:0048639	positive regulation of developmental growth	1.69E-05	0.000274175	0	0	3	191
GO:0022610 biological adhesion	5	1.69E-05	83.333	0.003	Biological Process	GO:0022610	biological adhesion	1.69E-05	0.000274175	0	0	5	1572
GO:0048699 generation of neurons	5	1.81E-05	83.333	0.003	Biological Process	GO:0048699	generation of neurons	1.81E-05	0.000291235	0	0	5	1594
GO:0030030 cell projection organization	5	1.84E-05	83.333	0.003	Biological Process	GO:0030030	cell projection organization	1.84E-05	0.000293366	0	0	5	1599
GO:0010469 regulation of signaling receptor activity	4	1.85E-05	66.667	0.006	Biological Process	GO:0010469	regulation of signaling receptor activity	1.85E-05	0.000293439	0	0	4	676
GO:0045893 positive regulation of transcription, DNA-templated	5	1.88E-05	83.333	0.003	Biological Process	GO:0045893	positive regulation of transcription, DNA-templated	1.88E-05	0.000294962	0	0	5	1606
GO:0048015 phosphatidylinositol-mediated signaling	3	1.91E-05	50	0.015	Biological Process	GO:0048015	phosphatidylinositol-mediated signaling	1.91E-05	0.000297674	0	0	3	199
GO:0051347 positive regulation of transferase activity	4	1.97E-05	66.667	0.006	Biological Process	GO:0051347	positive regulation of transferase activity	1.97E-05	0.000305383	0	0	4	687
GO:0048017 inositol lipid-mediated signaling	3	2.00E-05	50	0.015	Biological Process	GO:0048017	inositol lipid-mediated signaling	2.00E-05	0.000306441	0	0	3	202
GO:1903649 regulation of cytoplasmic transport	2	2.07E-05	33.333	0.083	Biological Process	GO:1903649	regulation of cytoplasmic transport	2.07E-05	0.000315332	0	0	2	24
GO:0050731 positive regulation of peptidyl-tyrosine phosphorylation	3	2.09E-05	50	0.015	Biological Process	GO:0050731	positive regulation of peptidyl-tyrosine phosphorylation	2.09E-05	0.000315332	0	0	3	205
GO:0003006 developmental process involved in reproduction	4	2.17E-05	66.667	0.006	Biological Process	GO:0003006	developmental process involved in reproduction	2.17E-05	0.000326081	0	0	4	704
GO:0048514 blood vessel morphogenesis	4	2.22E-05	66.667	0.006	Biological Process	GO:0048514	blood vessel morphogenesis	2.22E-05	0.000330935	0	0	4	708
GO:0050927 positive regulation of positive chemotaxis	2	2.44E-05	33.333	0.077	Biological Process	GO:0050927	positive regulation of positive chemotaxis	2.44E-05	0.000360248	0	0	2	26
GO:1903508 positive regulation of nucleic acid-templated transcription	5	2.49E-05	83.333	0.003	Biological Process	GO:1903508	positive regulation of nucleic acid-templated transcription	2.49E-05	0.000360986	0	0	5	1701
GO:0022008 neurogenesis	5	2.50E-05	83.333	0.003	Biological Process	GO:0022008	neurogenesis	2.50E-05	0.000360986	0	0	5	1702
GO:1902680 positive regulation of RNA biosynthetic process	5	2.50E-05	83.333	0.003	Biological Process	GO:1902680	positive regulation of RNA biosynthetic process	2.50E-05	0.000360986	0	0	5	1702
GO:0042325 regulation of phosphorylation	5	2.53E-05	83.333	0.003	Biological Process	GO:0042325	regulation of phosphorylation	2.53E-05	0.000362521	0	0	5	1706
GO:0071229 cellular response to acid chemical	3	2.58E-05	50	0.014	Biological Process	GO:0071229	cellular response to acid chemical	2.58E-05	0.00036689	0	0	3	220
GO:0032270 positive regulation of cellular protein metabolic process	5	2.63E-05	83.333	0.003	Biological Process	GO:0032270	positive regulation of cellular protein metabolic process	2.63E-05	0.000366944	0	0	5	1719
GO:0031954 positive regulation of protein autophosphorylation	2	2.63E-05	33.333	0.074	Biological Process	GO:0031954	positive regulation of protein autophosphorylation	2.63E-05	0.000366944	0	0	2	27
GO:0050926 regulation of positive chemotaxis	2	2.63E-05	33.333	0.074	Biological Process	GO:0050926	regulation of positive chemotaxis	2.63E-05	0.000366944	0	0	2	27
GO:0001775 cell activation	5	2.72E-05	83.333	0.003	Biological Process	GO:0001775	cell activation	2.72E-05	0.000375755	0	0	5	1731
GO:0009719 response to endogenous stimulus	5	2.82E-05	83.333	0.003	Biological Process	GO:0009719	response to endogenous stimulus	2.82E-05	0.00038714	0	0	5	1744
GO:0007169 transmembrane receptor protein tyrosine kinase signaling pathway	4	2.85E-05	66.667	0.005	Biological Process	GO:0007169	transmembrane receptor protein tyrosine kinase signaling pathway	2.85E-05	0.000388941	0	0	4	754
GO:1901700 response to oxygen-containing compound	5	2.97E-05	83.333	0.003	Biological Process	GO:1901700	response to oxygen-containing compound	2.97E-05	0.000400696	0	0	5	1762
GO:0050920 regulation of chemotaxis	3	2.98E-05	50	0.013	Biological Process	GO:0050920	regulation of chemotaxis	2.98E-05	0.000400696	0	0	3	231
GO:0007166 cell surface receptor signaling pathway	6	3.02E-05	100	0.002	Biological Process	GO:0007166	cell surface receptor signaling pathway	3.02E-05	0.000400696	0	0	6	3524
GO:0010001 glial cell differentiation	3	3.02E-05	50	0.013	Biological Process	GO:0010001	glial cell differentiation	3.02E-05	0.000400696	0	0	3	232
GO:0045737 positive regulation of cyclin-dependent protein serine/threonine kinase activity	2	3.05E-05	33.333	0.069	Biological Process	GO:0045737	positive regulation of cyclin-dependent protein serine/threonine kinase activity	3.05E-05	0.000400696	0	0	2	29
GO:0043281 regulation of cysteine-type endopeptidase activity involved in apoptotic process	3	3.06E-05	50	0.013	Biological Process	GO:0043281	regulation of cysteine-type endopeptidase activity involved in apoptotic process	3.06E-05	0.000400696	0	0	3	233
GO:0071456 cellular response to hypoxia	3	3.10E-05	50	0.013	Biological Process	GO:0071456	cellular response to hypoxia	3.10E-05	0.000403166	0	0	3	234
GO:0051239 regulation of multicellular organismal process	6	3.13E-05	100	0.002	Biological Process	GO:0051239	regulation of multicellular organismal process	3.13E-05	0.000404129	0	0	6	3545
GO:0051254 positive regulation of RNA metabolic process	5	3.29E-05	83.333	0.003	Biological Process	GO:0051254	positive regulation of RNA metabolic process	3.29E-05	0.00042279	0	0	5	1800
GO:0065009 regulation of molecular function	6	3.32E-05	100	0.002	Biological Process	GO:0065009	regulation of molecular function	3.32E-05	0.000423828	0	0	6	3581
GO:0009967 positive regulation of signal transduction	5	3.38E-05	83.333	0.003	Biological Process	GO:0009967	positive regulation of signal transduction	3.38E-05	0.000426145	0	0	5	1809
GO:0001894 tissue homeostasis	3	3.38E-05	50	0.012	Biological Process	GO:0001894	tissue homeostasis	3.38E-05	0.000426145	0	0	3	241
GO:0036294 cellular response to decreased oxygen levels	3	3.51E-05	50	0.012	Biological Process	GO:0036294	cellular response to decreased oxygen levels	3.51E-05	0.000434824	0	0	3	244
GO:0051054 positive regulation of DNA metabolic process	3	3.51E-05	50	0.012	Biological Process	GO:0051054	positive regulation of DNA metabolic process	3.51E-05	0.000434824	0	0	3	244
GO:0097529 myeloid leukocyte migration	3	3.56E-05	50	0.012	Biological Process	GO:0097529	myeloid leukocyte migration	3.56E-05	0.000434824	0	0	3	245
GO:0070887 cellular response to chemical stimulus	6	3.59E-05	100	0.002	Biological Process	GO:0070887	cellular response to chemical stimulus	3.59E-05	0.000434824	0	0	6	3627
GO:0046777 protein autophosphorylation	3	3.60E-05	50	0.012	Biological Process	GO:0046777	protein autophosphorylation	3.60E-05	0.000434824	0	0	3	246
GO:0009966 regulation of signal transduction	6	3.62E-05	100	0.002	Biological Process	GO:0009966	regulation of signal transduction	3.62E-05	0.000434824	0	0	6	3633
GO:0010033 response to organic substance	6	3.62E-05	100	0.002	Biological Process	GO:0010033	response to organic substance	3.62E-05	0.000434824	0	0	6	3633
GO:0051247 positive regulation of protein metabolic process	5	3.63E-05	83.333	0.003	Biological Process	GO:0051247	positive regulation of protein metabolic process	3.63E-05	0.000434824	0	0	5	1836
GO:0070555 response to interleukin-1	3	3.96E-05	50	0.012	Biological Process	GO:0070555	response to interleukin-1	3.96E-05	0.000465673	0	0	3	254
GO:0060674 placenta blood vessel development	2	3.96E-05	33.333	0.061	Biological Process	GO:0060674	placenta blood vessel development	3.96E-05	0.000465673	0	0	2	33
GO:1904031 positive regulation of cyclin-dependent protein kinase activity	2	3.96E-05	33.333	0.061	Biological Process	GO:1904031	positive regulation of cyclin-dependent protein kinase activity	3.96E-05	0.000465673	0	0	2	33
GO:0042127 regulation of cell proliferation	5	4.02E-05	83.333	0.003	Biological Process	GO:0042127	regulation of cell proliferation	4.02E-05	0.000468253	0	0	5	1874
GO:0033002 muscle cell proliferation	3	4.05E-05	50	0.012	Biological Process	GO:0033002	muscle cell proliferation	4.05E-05	0.000468253	0	0	3	256
GO:0050870 positive regulation of T cell activation	3	4.05E-05	50	0.012	Biological Process	GO:0050870	positive regulation of T cell activation	4.05E-05	0.000468253	0	0	3	256
GO:0030595 leukocyte chemotaxis	3	4.10E-05	50	0.012	Biological Process	GO:0030595	leukocyte chemotaxis	4.10E-05	0.000470959	0	0	3	257
GO:0032872 regulation of stress-activated MAPK cascade	3	4.15E-05	50	0.012	Biological Process	GO:0032872	regulation of stress-activated MAPK cascade	4.15E-05	0.000473676	0	0	3	258
GO:0032148 activation of protein kinase B activity	2	4.21E-05	33.333	0.059	Biological Process	GO:0032148	activation of protein kinase B activity	4.21E-05	0.000473694	0	0	2	34
GO:0043276 anoikis	2	4.21E-05	33.333	0.059	Biological Process	GO:0043276	anoikis	4.21E-05	0.000473694	0	0	2	34
GO:0080134 regulation of response to stress	5	4.24E-05	83.333	0.003	Biological Process	GO:0080134	regulation of response to stress	4.24E-05	0.000473694	0	0	5	1895
GO:0070302 regulation of stress-activated protein kinase signaling cascade	3	4.24E-05	50	0.012	Biological Process	GO:0070302	regulation of stress-activated protein kinase signaling cascade	4.24E-05	0.000473694	0	0	3	260
GO:0071453 cellular response to oxygen levels	3	4.29E-05	50	0.011	Biological Process	GO:0071453	cellular response to oxygen levels	4.29E-05	0.000476441	0	0	3	261
GO:0044093 positive regulation of molecular function	5	4.49E-05	83.333	0.003	Biological Process	GO:0044093	positive regulation of molecular function	4.49E-05	0.00049544	0	0	5	1917
GO:2000116 regulation of cysteine-type endopeptidase activity	3	4.54E-05	50	0.011	Biological Process	GO:2000116	regulation of cysteine-type endopeptidase activity	4.54E-05	0.00049854	0	0	3	266
GO:0045859 regulation of protein kinase activity	4	4.57E-05	66.667	0.005	Biological Process	GO:0045859	regulation of protein kinase activity	4.57E-05	0.000499008	0	0	4	850
GO:0019220 regulation of phosphate metabolic process	5	4.63E-05	83.333	0.003	Biological Process	GO:0019220	regulation of phosphate metabolic process	4.63E-05	0.000502205	0	0	5	1929
GO:0051174 regulation of phosphorus metabolic process	5	4.65E-05	83.333	0.003	Biological Process	GO:0051174	regulation of phosphorus metabolic process	4.65E-05	0.000502205	0	0	5	1931
GO:0048872 homeostasis of number of cells	3	4.80E-05	50	0.011	Biological Process	GO:0048872	homeostasis of number of cells	4.80E-05	0.000512675	0	0	3	271
GO:0050730 regulation of peptidyl-tyrosine phosphorylation	3	4.80E-05	50	0.011	Biological Process	GO:0050730	regulation of peptidyl-tyrosine phosphorylation	4.80E-05	0.000512675	0	0	3	271
GO:0048513 animal organ development	6	4.94E-05	100	0.002	Biological Process	GO:0048513	animal organ development	4.94E-05	0.000518644	0	0	6	3825
GO:0007411 axon guidance	3	4.96E-05	50	0.011	Biological Process	GO:0007411	axon guidance	4.96E-05	0.000518644	0	0	3	274
GO:0010951 negative regulation of endopeptidase activity	3	4.96E-05	50	0.011	Biological Process	GO:0010951	negative regulation of endopeptidase activity	4.96E-05	0.000518644	0	0	3	274
GO:0001893 maternal placenta development	2	4.99E-05	33.333	0.054	Biological Process	GO:0001893	maternal placenta development	4.99E-05	0.000518644	0	0	2	37
GO:0034405 response to fluid shear stress	2	4.99E-05	33.333	0.054	Biological Process	GO:0034405	response to fluid shear stress	4.99E-05	0.000518644	0	0	2	37
GO:0097485 neuron projection guidance	3	5.02E-05	50	0.011	Biological Process	GO:0097485	neuron projection guidance	5.02E-05	0.000518644	0	0	3	275
GO:0034504 protein localization to nucleus	3	5.13E-05	50	0.011	Biological Process	GO:0034504	protein localization to nucleus	5.13E-05	0.000521726	0	0	3	277
GO:0043406 positive regulation of MAP kinase activity	3	5.13E-05	50	0.011	Biological Process	GO:0043406	positive regulation of MAP kinase activity	5.13E-05	0.000521726	0	0	3	277
GO:1903039 positive regulation of leukocyte cell-cell adhesion	3	5.13E-05	50	0.011	Biological Process	GO:1903039	positive regulation of leukocyte cell-cell adhesion	5.13E-05	0.000521726	0	0	3	277
GO:0010647 positive regulation of cell communication	5	5.32E-05	83.333	0.003	Biological Process	GO:0010647	positive regulation of cell communication	5.32E-05	0.000538222	0	0	5	1984
GO:0010557 positive regulation of macromolecule biosynthetic process	5	5.37E-05	83.333	0.003	Biological Process	GO:0010557	positive regulation of macromolecule biosynthetic process	5.37E-05	0.000540788	0	0	5	1988
GO:0023056 positive regulation of signaling	5	5.42E-05	83.333	0.003	Biological Process	GO:0023056	positive regulation of signaling	5.42E-05	0.000543285	0	0	5	1992
GO:0031399 regulation of protein modification process	5	5.45E-05	83.333	0.003	Biological Process	GO:0031399	regulation of protein modification process	5.45E-05	0.000543285	0	0	5	1994
GO:0045022 early endosome to late endosome transport	2	5.55E-05	33.333	0.051	Biological Process	GO:0045022	early endosome to late endosome transport	5.55E-05	0.000548453	0	0	2	39
GO:0010466 negative regulation of peptidase activity	3	5.58E-05	50	0.011	Biological Process	GO:0010466	negative regulation of peptidase activity	5.58E-05	0.000548453	0	0	3	285
GO:0045935 positive regulation of nucleobase-containing compound metabolic process	5	5.59E-05	83.333	0.002	Biological Process	GO:0045935	positive regulation of nucleobase-containing compound metabolic process	5.59E-05	0.000548453	0	0	5	2004
GO:0045927 positive regulation of growth	3	5.82E-05	50	0.01	Biological Process	GO:0045927	positive regulation of growth	5.82E-05	0.000567335	0	0	3	289
GO:0002376 immune system process	6	5.84E-05	100	0.002	Biological Process	GO:0002376	immune system process	5.84E-05	0.000567335	0	0	6	3933
GO:0051049 regulation of transport	5	6.10E-05	83.333	0.002	Biological Process	GO:0051049	regulation of transport	6.10E-05	0.000589741	0	0	5	2040
GO:0042592 homeostatic process	5	6.17E-05	83.333	0.002	Biological Process	GO:0042592	homeostatic process	6.17E-05	0.000592478	0	0	5	2045
GO:0010632 regulation of epithelial cell migration	3	6.18E-05	50	0.01	Biological Process	GO:0010632	regulation of epithelial cell migration	6.18E-05	0.000592478	0	0	3	295
GO:0010907 positive regulation of glucose metabolic process	2	6.45E-05	33.333	0.048	Biological Process	GO:0010907	positive regulation of glucose metabolic process	6.45E-05	0.000606036	0	0	2	42
GO:0045124 regulation of bone resorption	2	6.45E-05	33.333	0.048	Biological Process	GO:0045124	regulation of bone resorption	6.45E-05	0.000606036	0	0	2	42
GO:0071276 cellular response to cadmium ion	2	6.45E-05	33.333	0.048	Biological Process	GO:0071276	cellular response to cadmium ion	6.45E-05	0.000606036	0	0	2	42
GO:0098927 vesicle-mediated transport between endosomal compartments	2	6.45E-05	33.333	0.048	Biological Process	GO:0098927	vesicle-mediated transport between endosomal compartments	6.45E-05	0.000606036	0	0	2	42
GO:0010646 regulation of cell communication	6	6.55E-05	100	0.001	Biological Process	GO:0010646	regulation of cell communication	6.55E-05	0.000612176	0	0	6	4009
GO:0043549 regulation of kinase activity	4	6.63E-05	66.667	0.004	Biological Process	GO:0043549	regulation of kinase activity	6.63E-05	0.000616677	0	0	4	934
GO:0038083 peptidyl-tyrosine autophosphorylation	2	6.76E-05	33.333	0.047	Biological Process	GO:0038083	peptidyl-tyrosine autophosphorylation	6.76E-05	0.00062652	0	0	2	43
GO:0031328 positive regulation of cellular biosynthetic process	5	6.98E-05	83.333	0.002	Biological Process	GO:0031328	positive regulation of cellular biosynthetic process	6.98E-05	0.000638352	0	0	5	2097
GO:0010628 positive regulation of gene expression	5	7.03E-05	83.333	0.002	Biological Process	GO:0010628	positive regulation of gene expression	7.03E-05	0.000638352	0	0	5	2100
GO:0051403 stress-activated MAPK cascade	3	7.03E-05	50	0.01	Biological Process	GO:0051403	stress-activated MAPK cascade	7.03E-05	0.000638352	0	0	3	308
GO:0023051 regulation of signaling	6	7.04E-05	100	0.001	Biological Process	GO:0023051	regulation of signaling	7.04E-05	0.000638352	0	0	6	4058
GO:0006897 endocytosis	4	7.05E-05	66.667	0.004	Biological Process	GO:0006897	endocytosis	7.05E-05	0.000638352	0	0	4	949
GO:1902531 regulation of intracellular signal transduction	5	7.13E-05	83.333	0.002	Biological Process	GO:1902531	regulation of intracellular signal transduction	7.13E-05	0.000642094	0	0	5	2106
GO:0009891 positive regulation of biosynthetic process	5	7.57E-05	83.333	0.002	Biological Process	GO:0009891	positive regulation of biosynthetic process	7.57E-05	0.000677415	0	0	5	2132
GO:0051091 positive regulation of DNA-binding transcription factor activity	3	7.59E-05	50	0.009	Biological Process	GO:0051091	positive regulation of DNA-binding transcription factor activity	7.59E-05	0.000677415	0	0	3	316
GO:0070851 growth factor receptor binding	3	6.02E-06	50	0.022	Molecular Function	GO:0070851	growth factor receptor binding	6.02E-06	0.000680042	0	0	3	137
GO:0019221 cytokine-mediated signaling pathway	4	7.65E-05	66.667	0.004	Biological Process	GO:0019221	cytokine-mediated signaling pathway	7.65E-05	0.000680286	0	0	4	969
GO:0006468 protein phosphorylation	5	7.85E-05	83.333	0.002	Biological Process	GO:0006468	protein phosphorylation	7.85E-05	0.00069377	0	0	5	2148
GO:0022409 positive regulation of cell-cell adhesion	3	7.88E-05	50	0.009	Biological Process	GO:0022409	positive regulation of cell-cell adhesion	7.88E-05	0.00069377	0	0	3	320
GO:0014070 response to organic cyclic compound	4	8.00E-05	66.667	0.004	Biological Process	GO:0014070	response to organic cyclic compound	8.00E-05	0.00070158	0	0	4	980
GO:0031018 endocrine pancreas development	2	8.09E-05	33.333	0.043	Biological Process	GO:0031018	endocrine pancreas development	8.09E-05	0.000703816	0	0	2	47
GO:0042063 gliogenesis	3	8.10E-05	50	0.009	Biological Process	GO:0042063	gliogenesis	8.10E-05	0.000703816	0	0	3	323
GO:0006915 apoptotic process	5	8.33E-05	83.333	0.002	Biological Process	GO:0006915	apoptotic process	8.33E-05	0.000720685	0	0	5	2174
GO:0031952 regulation of protein autophosphorylation	2	8.44E-05	33.333	0.042	Biological Process	GO:0031952	regulation of protein autophosphorylation	8.44E-05	0.000724046	0	0	2	48
GO:0060711 labyrinthine layer development	2	8.44E-05	33.333	0.042	Biological Process	GO:0060711	labyrinthine layer development	8.44E-05	0.000724046	0	0	2	48
GO:0043066 negative regulation of apoptotic process	4	8.83E-05	66.667	0.004	Biological Process	GO:0043066	negative regulation of apoptotic process	8.83E-05	0.000754256	0	0	4	1005
GO:0009888 tissue development	5	9.05E-05	83.333	0.002	Biological Process	GO:0009888	tissue development	9.05E-05	0.000769308	0	0	5	2211
GO:0031098 stress-activated protein kinase signaling cascade	3	9.11E-05	50	0.009	Biological Process	GO:0031098	stress-activated protein kinase signaling cascade	9.11E-05	0.000770909	0	0	3	336
GO:0046850 regulation of bone remodeling	2	9.17E-05	33.333	0.04	Biological Process	GO:0046850	regulation of bone remodeling	9.17E-05	0.000772604	0	0	2	50
GO:0070849 response to epidermal growth factor	2	9.54E-05	33.333	0.039	Biological Process	GO:0070849	response to epidermal growth factor	9.54E-05	0.000800595	0	0	2	51
GO:0048534 hematopoietic or lymphoid organ development	4	9.69E-05	66.667	0.004	Biological Process	GO:0048534	hematopoietic or lymphoid organ development	9.69E-05	0.000809781	0	0	4	1029
GO:0043069 negative regulation of programmed cell death	4	9.80E-05	66.667	0.004	Biological Process	GO:0043069	negative regulation of programmed cell death	9.80E-05	0.000815604	0	0	4	1032
GO:1903829 positive regulation of cellular protein localization	3	9.85E-05	50	0.009	Biological Process	GO:1903829	positive regulation of cellular protein localization	9.85E-05	0.000816279	0	0	3	345
GO:0051972 regulation of telomerase activity	2	9.92E-05	33.333	0.038	Biological Process	GO:0051972	regulation of telomerase activity	9.92E-05	0.000816435	0	0	2	52
GO:0060326 cell chemotaxis	3	9.94E-05	50	0.009	Biological Process	GO:0060326	cell chemotaxis	9.94E-05	0.000816435	0	0	3	346
GO:0010243 response to organonitrogen compound	4	9.99E-05	66.667	0.004	Biological Process	GO:0010243	response to organonitrogen compound	9.99E-05	0.000817348	0	0	4	1037
GO:0051338 regulation of transferase activity	4	0.000100637	66.667	0.004	Biological Process	GO:0051338	regulation of transferase activity	0.000100637	0.000820126	0	0	4	1039
GO:0048468 cell development	5	0.000102285	83.333	0.002	Biological Process	GO:0048468	cell development	0.000102285	0.000830117	0	0	5	2267
GO:0071356 cellular response to tumor necrosis factor	3	0.000106328	50	0.008	Biological Process	GO:0071356	cellular response to tumor necrosis factor	0.000106328	0.00085684	0	0	3	354
GO:0040007 growth	4	0.000106451	66.667	0.004	Biological Process	GO:0040007	growth	0.000106451	0.00085684	0	0	4	1054
GO:0007417 central nervous system development	4	0.000108042	66.667	0.004	Biological Process	GO:0007417	central nervous system development	0.000108042	0.000863211	0	0	4	1058
GO:0048638 regulation of developmental growth	3	0.000108121	50	0.008	Biological Process	GO:0048638	regulation of developmental growth	0.000108121	0.000863211	0	0	3	356
GO:0009790 embryo development	4	0.000108844	66.667	0.004	Biological Process	GO:0009790	embryo development	0.000108844	0.000865466	0	0	4	1060
GO:0010631 epithelial cell migration	3	0.000109934	50	0.008	Biological Process	GO:0010631	epithelial cell migration	0.000109934	0.000870604	0	0	3	358
GO:0007596 blood coagulation	3	0.000110848	50	0.008	Biological Process	GO:0007596	blood coagulation	0.000110848	0.000870818	0	0	3	359
GO:0033044 regulation of chromosome organization	3	0.000110848	50	0.008	Biological Process	GO:0033044	regulation of chromosome organization	0.000110848	0.000870818	0	0	3	359
GO:0098657 import into cell	4	0.000111687	66.667	0.004	Biological Process	GO:0098657	import into cell	0.000111687	0.000873916	0	0	4	1067
GO:0043405 regulation of MAP kinase activity	3	0.00011269	50	0.008	Biological Process	GO:0043405	regulation of MAP kinase activity	0.00011269	0.000874795	0	0	3	361
GO:0090132 epithelium migration	3	0.00011269	50	0.008	Biological Process	GO:0090132	epithelium migration	0.00011269	0.000874795	0	0	3	361
GO:0001101 response to acid chemical	3	0.000113619	50	0.008	Biological Process	GO:0001101	response to acid chemical	0.000113619	0.000878532	0	0	3	362
GO:0008284 positive regulation of cell proliferation	4	0.000114167	66.667	0.004	Biological Process	GO:0008284	positive regulation of cell proliferation	0.000114167	0.000878832	0	0	4	1073
GO:0001701 in utero embryonic development	3	0.000114552	50	0.008	Biological Process	GO:0001701	in utero embryonic development	0.000114552	0.000878832	0	0	3	363
GO:0007599 hemostasis	3	0.000115491	50	0.008	Biological Process	GO:0007599	hemostasis	0.000115491	0.000882587	0	0	3	364
GO:0050817 coagulation	3	0.000117384	50	0.008	Biological Process	GO:0050817	coagulation	0.000117384	0.000890482	0	0	3	366
GO:0012501 programmed cell death	5	0.000117723	83.333	0.002	Biological Process	GO:0012501	programmed cell death	0.000117723	0.000890482	0	0	5	2333
GO:0002520 immune system development	4	0.000117962	66.667	0.004	Biological Process	GO:0002520	immune system development	0.000117962	0.000890482	0	0	4	1082
GO:0090130 tissue migration	3	0.000118338	50	0.008	Biological Process	GO:0090130	tissue migration	0.000118338	0.000890482	0	0	3	367
GO:0001541 ovarian follicle development	2	0.00012355	33.333	0.034	Biological Process	GO:0001541	ovarian follicle development	0.00012355	0.000919138	0	0	2	58
GO:0032210 regulation of telomere maintenance via telomerase	2	0.00012355	33.333	0.034	Biological Process	GO:0032210	regulation of telomere maintenance via telomerase	0.00012355	0.000919138	0	0	2	58
GO:0048008 platelet-derived growth factor receptor signaling pathway	2	0.00012355	33.333	0.034	Biological Process	GO:0048008	platelet-derived growth factor receptor signaling pathway	0.00012355	0.000919138	0	0	2	58
GO:1903037 regulation of leukocyte cell-cell adhesion	3	0.000126153	50	0.008	Biological Process	GO:1903037	regulation of leukocyte cell-cell adhesion	0.000126153	0.000934964	0	0	3	375
GO:0032103 positive regulation of response to external stimulus	3	0.000127154	50	0.008	Biological Process	GO:0032103	positive regulation of response to external stimulus	0.000127154	0.000935161	0	0	3	376
GO:0031295 T cell costimulation	2	0.000127868	33.333	0.034	Biological Process	GO:0031295	T cell costimulation	0.000127868	0.000935161	0	0	2	59
GO:0071398 cellular response to fatty acid	2	0.000127868	33.333	0.034	Biological Process	GO:0071398	cellular response to fatty acid	0.000127868	0.000935161	0	0	2	59
GO:0032880 regulation of protein localization	4	0.000128085	66.667	0.004	Biological Process	GO:0032880	regulation of protein localization	0.000128085	0.000935161	0	0	4	1105
GO:0007167 enzyme linked receptor protein signaling pathway	4	0.000129451	66.667	0.004	Biological Process	GO:0007167	enzyme linked receptor protein signaling pathway	0.000129451	0.000941634	0	0	4	1108
GO:0034612 response to tumor necrosis factor	3	0.000130185	50	0.008	Biological Process	GO:0034612	response to tumor necrosis factor	0.000130185	0.000943482	0	0	3	379
GO:0050863 regulation of T cell activation	3	0.000132232	50	0.008	Biological Process	GO:0050863	regulation of T cell activation	0.000132232	0.000951494	0	0	3	381
GO:0031294 lymphocyte costimulation	2	0.00013226	33.333	0.033	Biological Process	GO:0031294	lymphocyte costimulation	0.00013226	0.000951494	0	0	2	60
GO:0001666 response to hypoxia	3	0.000137443	50	0.008	Biological Process	GO:0001666	response to hypoxia	0.000137443	0.000985173	0	0	3	386
GO:0018108 peptidyl-tyrosine phosphorylation	3	0.000140633	50	0.008	Biological Process	GO:0018108	peptidyl-tyrosine phosphorylation	0.000140633	0.001004372	0	0	3	389
GO:0046622 positive regulation of organ growth	2	0.000141263	33.333	0.032	Biological Process	GO:0046622	positive regulation of organ growth	0.000141263	0.001005222	0	0	2	62
GO:0018212 peptidyl-tyrosine modification	3	0.000143871	50	0.008	Biological Process	GO:0018212	peptidyl-tyrosine modification	0.000143871	0.001020079	0	0	3	392
GO:0010676 positive regulation of cellular carbohydrate metabolic process	2	0.000145875	33.333	0.032	Biological Process	GO:0010676	positive regulation of cellular carbohydrate metabolic process	0.000145875	0.001023212	0	0	2	63
GO:0051893 regulation of focal adhesion assembly	2	0.000145875	33.333	0.032	Biological Process	GO:0051893	regulation of focal adhesion assembly	0.000145875	0.001023212	0	0	2	63
GO:0090109 regulation of cell-substrate junction assembly	2	0.000145875	33.333	0.032	Biological Process	GO:0090109	regulation of cell-substrate junction assembly	0.000145875	0.001023212	0	0	2	63
GO:1901698 response to nitrogen compound	4	0.000146694	66.667	0.003	Biological Process	GO:1901698	response to nitrogen compound	0.000146694	0.001025295	0	0	4	1144
GO:0060548 negative regulation of cell death	4	0.000148204	66.667	0.003	Biological Process	GO:0060548	negative regulation of cell death	0.000148204	0.00102894	0	0	4	1147
GO:0035690 cellular response to drug	3	0.000148264	50	0.008	Biological Process	GO:0035690	cellular response to drug	0.000148264	0.00102894	0	0	3	396
GO:0036293 response to decreased oxygen levels	3	0.000149376	50	0.008	Biological Process	GO:0036293	response to decreased oxygen levels	0.000149376	0.001029381	0	0	3	397
GO:0045765 regulation of angiogenesis	3	0.000149376	50	0.008	Biological Process	GO:0045765	regulation of angiogenesis	0.000149376	0.001029381	0	0	3	397
GO:0045453 bone resorption	2	0.000150561	33.333	0.031	Biological Process	GO:0045453	bone resorption	0.000150561	0.001033922	0	0	2	64
GO:0045861 negative regulation of proteolysis	3	0.000156162	50	0.007	Biological Process	GO:0045861	negative regulation of proteolysis	0.000156162	0.001068647	0	0	3	403
GO:0001503 ossification	3	0.000159629	50	0.007	Biological Process	GO:0001503	ossification	0.000159629	0.001084617	0	0	3	406
GO:0060135 maternal process involved in female pregnancy	2	0.000160152	33.333	0.03	Biological Process	GO:0060135	maternal process involved in female pregnancy	0.000160152	0.001084617	0	0	2	66
GO:1904356 regulation of telomere maintenance via telomere lengthening	2	0.000160152	33.333	0.03	Biological Process	GO:1904356	regulation of telomere maintenance via telomere lengthening	0.000160152	0.001084617	0	0	2	66
GO:0008219 cell death	5	0.000162214	83.333	0.002	Biological Process	GO:0008219	cell death	0.000162214	0.001094802	0	0	5	2491
GO:0007399 nervous system development	5	0.000162851	83.333	0.002	Biological Process	GO:0007399	nervous system development	0.000162851	0.001095341	0	0	5	2493
GO:0007159 leukocyte cell-cell adhesion	3	0.00016552	50	0.007	Biological Process	GO:0007159	leukocyte cell-cell adhesion	0.00016552	0.001109494	0	0	3	411
GO:0046686 response to cadmium ion	2	0.000175089	33.333	0.029	Biological Process	GO:0046686	response to cadmium ion	0.000175089	0.00116174	0	0	2	69
GO:1903391 regulation of adherens junction organization	2	0.000175089	33.333	0.029	Biological Process	GO:1903391	regulation of adherens junction organization	0.000175089	0.00116174	0	0	2	69
GO:1905953 negative regulation of lipid localization	2	0.000175089	33.333	0.029	Biological Process	GO:1905953	negative regulation of lipid localization	0.000175089	0.00116174	0	0	2	69
GO:0070482 response to oxygen levels	3	0.000177726	50	0.007	Biological Process	GO:0070482	response to oxygen levels	0.000177726	0.001175266	0	0	3	421
GO:0006950 response to stress	6	0.000184893	100	0.001	Biological Process	GO:0006950	response to stress	0.000184893	0.00121384	0	0	6	4766
GO:0035924 cellular response to vascular endothelial growth factor stimulus	2	0.000185413	33.333	0.028	Biological Process	GO:0035924	cellular response to vascular endothelial growth factor stimulus	0.000185413	0.00121384	0	0	2	71
GO:2000573 positive regulation of DNA biosynthetic process	2	0.000185413	33.333	0.028	Biological Process	GO:2000573	positive regulation of DNA biosynthetic process	0.000185413	0.00121384	0	0	2	71
GO:0022603 regulation of anatomical structure morphogenesis	4	0.000194694	66.667	0.003	Biological Process	GO:0022603	regulation of anatomical structure morphogenesis	0.000194694	0.001270363	0	0	4	1230
GO:1901342 regulation of vasculature development	3	0.000201156	50	0.007	Biological Process	GO:1901342	regulation of vasculature development	0.000201156	0.001305762	0	0	3	439
GO:0007004 telomere maintenance via telomerase	2	0.000201449	33.333	0.027	Biological Process	GO:0007004	telomere maintenance via telomerase	0.000201449	0.001305762	0	0	2	74
GO:0048878 chemical homeostasis	4	0.000204121	66.667	0.003	Biological Process	GO:0048878	chemical homeostasis	0.000204121	0.001318727	0	0	4	1245
GO:0050673 epithelial cell proliferation	3	0.000206623	50	0.007	Biological Process	GO:0050673	epithelial cell proliferation	0.000206623	0.001330514	0	0	3	443
GO:0016310 phosphorylation	5	0.000209524	83.333	0.002	Biological Process	GO:0016310	phosphorylation	0.000209524	0.001344788	0	0	5	2625
GO:0051052 regulation of DNA metabolic process	3	0.000212186	50	0.007	Biological Process	GO:0051052	regulation of DNA metabolic process	0.000212186	0.001355064	0	0	3	447
GO:0006278 RNA-dependent DNA biosynthetic process	2	0.000212505	33.333	0.026	Biological Process	GO:0006278	RNA-dependent DNA biosynthetic process	0.000212505	0.001355064	0	0	2	76
GO:0006417 regulation of translation	3	0.000213592	50	0.007	Biological Process	GO:0006417	regulation of translation	0.000213592	0.001357589	0	0	3	448
GO:0031663 lipopolysaccharide-mediated signaling pathway	2	0.000218143	33.333	0.026	Biological Process	GO:0031663	lipopolysaccharide-mediated signaling pathway	0.000218143	0.001382039	0	0	2	77
GO:0051251 positive regulation of lymphocyte activation	3	0.000223606	50	0.007	Biological Process	GO:0051251	positive regulation of lymphocyte activation	0.000223606	0.001409128	0	0	3	455
GO:0051881 regulation of mitochondrial membrane potential	2	0.000223853	33.333	0.026	Biological Process	GO:0051881	regulation of mitochondrial membrane potential	0.000223853	0.001409128	0	0	2	78
GO:0051128 regulation of cellular component organization	5	0.000233525	83.333	0.002	Biological Process	GO:0051128	regulation of cellular component organization	0.000233525	0.001465312	0	0	5	2684
GO:0031016 pancreas development	2	0.000235493	33.333	0.025	Biological Process	GO:0031016	pancreas development	0.000235493	0.001472959	0	0	2	80
GO:0051248 negative regulation of protein metabolic process	4	0.000239415	66.667	0.003	Biological Process	GO:0051248	negative regulation of protein metabolic process	0.000239415	0.001492731	0	0	4	1297
GO:0043536 positive regulation of blood vessel endothelial cell migration	2	0.000247425	33.333	0.024	Biological Process	GO:0043536	positive regulation of blood vessel endothelial cell migration	0.000247425	0.001529424	0	0	2	82
GO:0045913 positive regulation of carbohydrate metabolic process	2	0.000247425	33.333	0.024	Biological Process	GO:0045913	positive regulation of carbohydrate metabolic process	0.000247425	0.001529424	0	0	2	82
GO:0001667 ameboidal-type cell migration	3	0.000247636	50	0.006	Biological Process	GO:0001667	ameboidal-type cell migration	0.000247636	0.001529424	0	0	3	471
GO:0007409 axonogenesis	3	0.000252321	50	0.006	Biological Process	GO:0007409	axonogenesis	0.000252321	0.001553477	0	0	3	474
GO:0009628 response to abiotic stimulus	4	0.000259414	66.667	0.003	Biological Process	GO:0009628	response to abiotic stimulus	0.000259414	0.001578795	0	0	4	1324
GO:0007045 cell-substrate adherens junction assembly	2	0.000259649	33.333	0.024	Biological Process	GO:0007045	cell-substrate adherens junction assembly	0.000259649	0.001578795	0	0	2	84
GO:0048041 focal adhesion assembly	2	0.000259649	33.333	0.024	Biological Process	GO:0048041	focal adhesion assembly	0.000259649	0.001578795	0	0	2	84
GO:0050918 positive chemotaxis	2	0.000259649	33.333	0.024	Biological Process	GO:0050918	positive chemotaxis	0.000259649	0.001578795	0	0	2	84
GO:0051222 positive regulation of protein transport	3	0.000265099	50	0.006	Biological Process	GO:0051222	positive regulation of protein transport	0.000265099	0.001606958	0	0	3	482
GO:0022407 regulation of cell-cell adhesion	3	0.000266725	50	0.006	Biological Process	GO:0022407	regulation of cell-cell adhesion	0.000266725	0.001611842	0	0	3	483
GO:0052548 regulation of endopeptidase activity	3	0.000268358	50	0.006	Biological Process	GO:0052548	regulation of endopeptidase activity	0.000268358	0.001616735	0	0	3	484
GO:0010833 telomere maintenance via telomere lengthening	2	0.000272164	33.333	0.023	Biological Process	GO:0010833	telomere maintenance via telomere lengthening	0.000272164	0.001634648	0	0	2	86
GO:0051130 positive regulation of cellular component organization	4	0.000283048	66.667	0.003	Biological Process	GO:0051130	positive regulation of cellular component organization	0.000283048	0.001694833	0	0	4	1354
GO:0048583 regulation of response to stimulus	6	0.000286262	100	0.001	Biological Process	GO:0048583	regulation of response to stimulus	0.000286262	0.001704002	0	0	6	5126
GO:0033043 regulation of organelle organization	4	0.000286314	66.667	0.003	Biological Process	GO:0033043	regulation of organelle organization	0.000286314	0.001704002	0	0	4	1358
GO:0001776 leukocyte homeostasis	2	0.000298066	33.333	0.022	Biological Process	GO:0001776	leukocyte homeostasis	0.000298066	0.001746884	0	0	2	90
GO:0001892 embryonic placenta development	2	0.000298066	33.333	0.022	Biological Process	GO:0001892	embryonic placenta development	0.000298066	0.001746884	0	0	2	90
GO:0032204 regulation of telomere maintenance	2	0.000298066	33.333	0.022	Biological Process	GO:0032204	regulation of telomere maintenance	0.000298066	0.001746884	0	0	2	90
GO:0060709 glycogen cell differentiation involved in embryonic placenta development	1	0.000300601	16.667	1	Biological Process	GO:0060709	glycogen cell differentiation involved in embryonic placenta development	0.000300601	0.001746884	0	0	1	1
GO:0100002 negative regulation of protein kinase activity by protein phosphorylation	1	0.000300601	16.667	1	Biological Process	GO:0100002	negative regulation of protein kinase activity by protein phosphorylation	0.000300601	0.001746884	0	0	1	1
GO:1903570 regulation of protein kinase D signaling	1	0.000300601	16.667	1	Biological Process	GO:1903570	regulation of protein kinase D signaling	0.000300601	0.001746884	0	0	1	1
GO:1903572 positive regulation of protein kinase D signaling	1	0.000300601	16.667	1	Biological Process	GO:1903572	positive regulation of protein kinase D signaling	0.000300601	0.001746884	0	0	1	1
GO:0002696 positive regulation of leukocyte activation	3	0.000300635	50	0.006	Biological Process	GO:0002696	positive regulation of leukocyte activation	0.000300635	0.001746884	0	0	3	503
GO:0034103 regulation of tissue remodeling	2	0.000304724	33.333	0.022	Biological Process	GO:0034103	regulation of tissue remodeling	0.000304724	0.001760228	0	0	2	91
GO:0070542 response to fatty acid	2	0.000304724	33.333	0.022	Biological Process	GO:0070542	response to fatty acid	0.000304724	0.001760228	0	0	2	91
GO:0034248 regulation of cellular amide metabolic process	3	0.000307738	50	0.006	Biological Process	GO:0034248	regulation of cellular amide metabolic process	0.000307738	0.001772425	0	0	3	507
GO:0031667 response to nutrient levels	3	0.00030953	50	0.006	Biological Process	GO:0031667	response to nutrient levels	0.00030953	0.001777537	0	0	3	508
GO:0052547 regulation of peptidase activity	3	0.000313136	50	0.006	Biological Process	GO:0052547	regulation of peptidase activity	0.000313136	0.001793001	0	0	3	510
GO:0034333 adherens junction assembly	2	0.000318256	33.333	0.022	Biological Process	GO:0034333	adherens junction assembly	0.000318256	0.001808024	0	0	2	93
GO:0046849 bone remodeling	2	0.000318256	33.333	0.022	Biological Process	GO:0046849	bone remodeling	0.000318256	0.001808024	0	0	2	93
GO:0048731 system development	6	0.000318521	100	0.001	Biological Process	GO:0048731	system development	0.000318521	0.001808024	0	0	6	5218
GO:0051346 negative regulation of hydrolase activity	3	0.00032227	50	0.006	Biological Process	GO:0051346	negative regulation of hydrolase activity	0.00032227	0.001818823	0	0	3	515
GO:0009968 negative regulation of signal transduction	4	0.000322307	66.667	0.003	Biological Process	GO:0009968	negative regulation of signal transduction	0.000322307	0.001818823	0	0	4	1400
GO:0060429 epithelium development	4	0.000323202	66.667	0.003	Biological Process	GO:0060429	epithelium development	0.000323202	0.001818823	0	0	4	1401
GO:0048708 astrocyte differentiation	2	0.000325131	33.333	0.021	Biological Process	GO:0048708	astrocyte differentiation	0.000325131	0.001824451	0	0	2	94
GO:0032268 regulation of cellular protein metabolic process	5	0.00032699	83.333	0.002	Biological Process	GO:0032268	regulation of cellular protein metabolic process	0.00032699	0.001829653	0	0	5	2876
GO:0061564 axon development	3	0.000331577	50	0.006	Biological Process	GO:0061564	axon development	0.000331577	0.001850047	0	0	3	520
GO:1904951 positive regulation of establishment of protein localization	3	0.000333459	50	0.006	Biological Process	GO:1904951	positive regulation of establishment of protein localization	0.000333459	0.001855278	0	0	3	521
GO:0048871 multicellular organismal homeostasis	3	0.000335348	50	0.006	Biological Process	GO:0048871	multicellular organismal homeostasis	0.000335348	0.001860517	0	0	3	522
GO:0048010 vascular endothelial growth factor receptor signaling pathway	2	0.000339099	33.333	0.021	Biological Process	GO:0048010	vascular endothelial growth factor receptor signaling pathway	0.000339099	0.001876029	0	0	2	96
GO:0050867 positive regulation of cell activation	3	0.000341057	50	0.006	Biological Process	GO:0050867	positive regulation of cell activation	0.000341057	0.001881561	0	0	3	525
GO:0048523 negative regulation of cellular process	6	0.00034544	100	0.001	Biological Process	GO:0048523	negative regulation of cellular process	0.00034544	0.001900403	0	0	6	5289
GO:0042221 response to chemical	6	0.000352159	100	0.001	Biological Process	GO:0042221	response to chemical	0.000352159	0.001931955	0	0	6	5306
GO:0042110 T cell activation	3	0.000366529	50	0.006	Biological Process	GO:0042110	T cell activation	0.000366529	0.00200156	0	0	3	538
GO:0007044 cell-substrate junction assembly	2	0.000367904	33.333	0.02	Biological Process	GO:0007044	cell-substrate junction assembly	0.000367904	0.00200156	0	0	2	100
GO:0008585 female gonad development	2	0.000367904	33.333	0.02	Biological Process	GO:0008585	female gonad development	0.000367904	0.00200156	0	0	2	100
GO:0009991 response to extracellular stimulus	3	0.000372578	50	0.006	Biological Process	GO:0009991	response to extracellular stimulus	0.000372578	0.00202139	0	0	3	541
GO:0000079 regulation of cyclin-dependent protein serine/threonine kinase activity	2	0.000375286	33.333	0.02	Biological Process	GO:0000079	regulation of cyclin-dependent protein serine/threonine kinase activity	0.000375286	0.002030473	0	0	2	101
GO:0002042 cell migration involved in sprouting angiogenesis	2	0.00038274	33.333	0.02	Biological Process	GO:0002042	cell migration involved in sprouting angiogenesis	0.00038274	0.00204958	0	0	2	102
GO:0070301 cellular response to hydrogen peroxide	2	0.00038274	33.333	0.02	Biological Process	GO:0070301	cellular response to hydrogen peroxide	0.00038274	0.00204958	0	0	2	102
GO:1901655 cellular response to ketone	2	0.00038274	33.333	0.02	Biological Process	GO:1901655	cellular response to ketone	0.00038274	0.00204958	0	0	2	102
GO:0051704 multi-organism process	5	0.000382992	83.333	0.002	Biological Process	GO:0051704	multi-organism process	0.000382992	0.00204958	0	0	5	2971
GO:1903827 regulation of cellular protein localization	3	0.000384871	50	0.005	Biological Process	GO:1903827	regulation of cellular protein localization	0.000384871	0.00205145	0	0	3	547
GO:0071495 cellular response to endogenous stimulus	4	0.00038543	66.667	0.003	Biological Process	GO:0071495	cellular response to endogenous stimulus	0.00038543	0.00205145	0	0	4	1466
GO:1901888 regulation of cell junction assembly	2	0.000390267	33.333	0.019	Biological Process	GO:1901888	regulation of cell junction assembly	0.000390267	0.00207158	0	0	2	103
GO:0046545 development of primary female sexual characteristics	2	0.000405537	33.333	0.019	Biological Process	GO:0046545	development of primary female sexual characteristics	0.000405537	0.002141063	0	0	2	105
GO:1904029 regulation of cyclin-dependent protein kinase activity	2	0.000405537	33.333	0.019	Biological Process	GO:1904029	regulation of cyclin-dependent protein kinase activity	0.000405537	0.002141063	0	0	2	105
GO:0005125 cytokine activity	3	4.59E-05	50	0.011	Molecular Function	GO:0005125	cytokine activity	4.59E-05	0.002189968	0	0	3	270
GO:0004712 protein serine/threonine/tyrosine kinase activity	2	7.57E-05	33.333	0.043	Molecular Function	GO:0004712	protein serine/threonine/tyrosine kinase activity	7.57E-05	0.002189968	0	0	2	46
GO:0005126 cytokine receptor binding	3	8.72E-05	50	0.009	Molecular Function	GO:0005126	cytokine receptor binding	8.72E-05	0.002189968	0	0	3	335
GO:0005080 protein kinase C binding	2	9.69E-05	33.333	0.038	Molecular Function	GO:0005080	protein kinase C binding	9.69E-05	0.002189968	0	0	2	52
GO:2001243 negative regulation of intrinsic apoptotic signaling pathway	2	0.000421097	33.333	0.019	Biological Process	GO:2001243	negative regulation of intrinsic apoptotic signaling pathway	0.000421097	0.002217248	0	0	2	107
GO:0009636 response to toxic substance	3	0.000429971	50	0.005	Biological Process	GO:0009636	response to toxic substance	0.000429971	0.002257922	0	0	3	568
GO:0002521 leukocyte differentiation	3	0.000436682	50	0.005	Biological Process	GO:0002521	leukocyte differentiation	0.000436682	0.002287047	0	0	3	571
GO:0022414 reproductive process	4	0.000438954	66.667	0.003	Biological Process	GO:0022414	reproductive process	0.000438954	0.002292835	0	0	4	1516
GO:0060627 regulation of vesicle-mediated transport	3	0.000441193	50	0.005	Biological Process	GO:0060627	regulation of vesicle-mediated transport	0.000441193	0.00229803	0	0	3	573
GO:0000003 reproduction	4	0.00044233	66.667	0.003	Biological Process	GO:0000003	reproduction	0.00044233	0.00229803	0	0	4	1519
GO:0010648 negative regulation of cell communication	4	0.000443459	66.667	0.003	Biological Process	GO:0010648	negative regulation of cell communication	0.000443459	0.00229803	0	0	4	1520
GO:0023057 negative regulation of signaling	4	0.000447998	66.667	0.003	Biological Process	GO:0023057	negative regulation of signaling	0.000447998	0.00231544	0	0	4	1524
GO:0043085 positive regulation of catalytic activity	4	0.000450279	66.667	0.003	Biological Process	GO:0043085	positive regulation of catalytic activity	0.000450279	0.002321126	0	0	4	1526
GO:0071407 cellular response to organic cyclic compound	3	0.000464206	50	0.005	Biological Process	GO:0071407	cellular response to organic cyclic compound	0.000464206	0.00238665	0	0	3	583
GO:0001938 positive regulation of endothelial cell proliferation	2	0.000469504	33.333	0.018	Biological Process	GO:0001938	positive regulation of endothelial cell proliferation	0.000469504	0.002401318	0	0	2	113
GO:0071887 leukocyte apoptotic process	2	0.000469504	33.333	0.018	Biological Process	GO:0071887	leukocyte apoptotic process	0.000469504	0.002401318	0	0	2	113
GO:0046620 regulation of organ growth	2	0.000477824	33.333	0.018	Biological Process	GO:0046620	regulation of organ growth	0.000477824	0.002431209	0	0	2	114
GO:2000278 regulation of DNA biosynthetic process	2	0.000477824	33.333	0.018	Biological Process	GO:2000278	regulation of DNA biosynthetic process	0.000477824	0.002431209	0	0	2	114
GO:0048661 positive regulation of smooth muscle cell proliferation	2	0.000486216	33.333	0.017	Biological Process	GO:0048661	positive regulation of smooth muscle cell proliferation	0.000486216	0.002467516	0	0	2	115
GO:0042060 wound healing	3	0.000500168	50	0.005	Biological Process	GO:0042060	wound healing	0.000500168	0.00252527	0	0	3	598
GO:0048667 cell morphogenesis involved in neuron differentiation	3	0.000500168	50	0.005	Biological Process	GO:0048667	cell morphogenesis involved in neuron differentiation	0.000500168	0.00252527	0	0	3	598
GO:0010906 regulation of glucose metabolic process	2	0.000503216	33.333	0.017	Biological Process	GO:0010906	regulation of glucose metabolic process	0.000503216	0.002534143	0	0	2	117
GO:0031623 receptor internalization	2	0.000520503	33.333	0.017	Biological Process	GO:0031623	receptor internalization	0.000520503	0.002607825	0	0	2	119
GO:2001237 negative regulation of extrinsic apoptotic signaling pathway	2	0.000520503	33.333	0.017	Biological Process	GO:2001237	negative regulation of extrinsic apoptotic signaling pathway	0.000520503	0.002607825	0	0	2	119
GO:0071417 cellular response to organonitrogen compound	3	0.00052766	50	0.005	Biological Process	GO:0071417	cellular response to organonitrogen compound	0.00052766	0.002636958	0	0	3	609
GO:0046660 female sex differentiation	2	0.000529254	33.333	0.017	Biological Process	GO:0046660	female sex differentiation	0.000529254	0.00263821	0	0	2	120
GO:0007173 epidermal growth factor receptor signaling pathway	2	0.000538077	33.333	0.017	Biological Process	GO:0007173	epidermal growth factor receptor signaling pathway	0.000538077	0.0026754	0	0	2	121
GO:0018107 peptidyl-threonine phosphorylation	2	0.000546972	33.333	0.016	Biological Process	GO:0018107	peptidyl-threonine phosphorylation	0.000546972	0.002712758	0	0	2	122
GO:0051246 regulation of protein metabolic process	5	0.000555093	83.333	0.002	Biological Process	GO:0051246	regulation of protein metabolic process	0.000555093	0.002746102	0	0	5	3207
GO:0051249 regulation of lymphocyte activation	3	0.000572051	50	0.005	Biological Process	GO:0051249	regulation of lymphocyte activation	0.000572051	0.002822883	0	0	3	626
GO:0006810 transport	6	0.000587965	100	0.001	Biological Process	GO:0006810	transport	0.000587965	0.002875966	0	0	6	5779
GO:0043009 chordate embryonic development	3	0.000588278	50	0.005	Biological Process	GO:0043009	chordate embryonic development	0.000588278	0.002875966	0	0	3	632
GO:0010595 positive regulation of endothelial cell migration	2	0.00059252	33.333	0.016	Biological Process	GO:0010595	positive regulation of endothelial cell migration	0.00059252	0.002875966	0	0	2	127
GO:0001545 primary ovarian follicle growth	1	0.000601127	16.667	0.5	Biological Process	GO:0001545	primary ovarian follicle growth	0.000601127	0.002875966	0	0	1	2
GO:0002384 hepatic immune response	1	0.000601127	16.667	0.5	Biological Process	GO:0002384	hepatic immune response	0.000601127	0.002875966	0	0	1	2
GO:0003169 coronary vein morphogenesis	1	0.000601127	16.667	0.5	Biological Process	GO:0003169	coronary vein morphogenesis	0.000601127	0.002875966	0	0	1	2
GO:0019858 cytosine metabolic process	1	0.000601127	16.667	0.5	Biological Process	GO:0019858	cytosine metabolic process	0.000601127	0.002875966	0	0	1	2
GO:0038190 VEGF-activated neuropilin signaling pathway	1	0.000601127	16.667	0.5	Biological Process	GO:0038190	VEGF-activated neuropilin signaling pathway	0.000601127	0.002875966	0	0	1	2
GO:0086098 angiotensin-activated signaling pathway involved in heart process	1	0.000601127	16.667	0.5	Biological Process	GO:0086098	angiotensin-activated signaling pathway involved in heart process	0.000601127	0.002875966	0	0	1	2
GO:1902336 positive regulation of retinal ganglion cell axon guidance	1	0.000601127	16.667	0.5	Biological Process	GO:1902336	positive regulation of retinal ganglion cell axon guidance	0.000601127	0.002875966	0	0	1	2
GO:1905603 regulation of maintenance of permeability of blood-brain barrier	1	0.000601127	16.667	0.5	Biological Process	GO:1905603	regulation of maintenance of permeability of blood-brain barrier	0.000601127	0.002875966	0	0	1	2
GO:2000386 positive regulation of ovarian follicle development	1	0.000601127	16.667	0.5	Biological Process	GO:2000386	positive regulation of ovarian follicle development	0.000601127	0.002875966	0	0	1	2
GO:0001952 regulation of cell-matrix adhesion	2	0.000601844	33.333	0.016	Biological Process	GO:0001952	regulation of cell-matrix adhesion	0.000601844	0.002875966	0	0	2	128
GO:0021782 glial cell development	2	0.00061124	33.333	0.016	Biological Process	GO:0021782	glial cell development	0.00061124	0.002913776	0	0	2	129
GO:0018210 peptidyl-threonine modification	2	0.000620708	33.333	0.015	Biological Process	GO:0018210	peptidyl-threonine modification	0.000620708	0.002951743	0	0	2	130
GO:0007275 multicellular organism development	6	0.000623646	100	0.001	Biological Process	GO:0007275	multicellular organism development	0.000623646	0.002958553	0	0	6	5836
GO:0009792 embryo development ending in birth or egg hatching	3	0.000644522	50	0.005	Biological Process	GO:0009792	embryo development ending in birth or egg hatching	0.000644522	0.003050218	0	0	3	652
GO:0045727 positive regulation of translation	2	0.000649539	33.333	0.015	Biological Process	GO:0045727	positive regulation of translation	0.000649539	0.003066572	0	0	2	133
GO:0051234 establishment of localization	6	0.000669916	100	0.001	Biological Process	GO:0051234	establishment of localization	0.000669916	0.003155193	0	0	6	5906
GO:0048812 neuron projection morphogenesis	3	0.000685897	50	0.005	Biological Process	GO:0048812	neuron projection morphogenesis	0.000685897	0.003222733	0	0	3	666
GO:0014066 regulation of phosphatidylinositol 3-kinase signaling	2	0.000709127	33.333	0.014	Biological Process	GO:0014066	regulation of phosphatidylinositol 3-kinase signaling	0.000709127	0.003323929	0	0	2	139
GO:0045598 regulation of fat cell differentiation	2	0.000719308	33.333	0.014	Biological Process	GO:0045598	regulation of fat cell differentiation	0.000719308	0.003363622	0	0	2	140
GO:0042981 regulation of apoptotic process	4	0.000721537	66.667	0.002	Biological Process	GO:0042981	regulation of apoptotic process	0.000721537	0.00336603	0	0	4	1724
GO:0120039 plasma membrane bounded cell projection morphogenesis	3	0.000728959	50	0.004	Biological Process	GO:0120039	plasma membrane bounded cell projection morphogenesis	0.000728959	0.003383595	0	0	3	680
GO:0032940 secretion by cell	4	0.000729638	66.667	0.002	Biological Process	GO:0032940	secretion by cell	0.000729638	0.003383595	0	0	4	1729
GO:0048522 positive regulation of cellular process	6	0.00073211	100	0.001	Biological Process	GO:0048522	positive regulation of cellular process	0.00073211	0.003383595	0	0	6	5994
GO:0010638 positive regulation of organelle organization	3	0.000735249	50	0.004	Biological Process	GO:0010638	positive regulation of organelle organization	0.000735249	0.003383595	0	0	3	682
GO:0048858 cell projection morphogenesis	3	0.000735249	50	0.004	Biological Process	GO:0048858	cell projection morphogenesis	0.000735249	0.003383595	0	0	3	682
GO:0051173 positive regulation of nitrogen compound metabolic process	5	0.000735639	83.333	0.001	Biological Process	GO:0051173	positive regulation of nitrogen compound metabolic process	0.000735639	0.003383595	0	0	5	3399
GO:0010675 regulation of cellular carbohydrate metabolic process	2	0.000739883	33.333	0.014	Biological Process	GO:0010675	regulation of cellular carbohydrate metabolic process	0.000739883	0.003395165	0	0	2	142
GO:1901699 cellular response to nitrogen compound	3	0.00075113	50	0.004	Biological Process	GO:1901699	cellular response to nitrogen compound	0.00075113	0.003438742	0	0	3	687
GO:0120035 regulation of plasma membrane bounded cell projection organization	3	0.000763994	50	0.004	Biological Process	GO:0120035	regulation of plasma membrane bounded cell projection organization	0.000763994	0.003489498	0	0	3	691
GO:0048589 developmental growth	3	0.000770479	50	0.004	Biological Process	GO:0048589	developmental growth	0.000770479	0.003502826	0	0	3	693
GO:0061061 muscle structure development	3	0.000770479	50	0.004	Biological Process	GO:0061061	muscle structure development	0.000770479	0.003502826	0	0	3	693
GO:0043067 regulation of programmed cell death	4	0.000774536	66.667	0.002	Biological Process	GO:0043067	regulation of programmed cell death	0.000774536	0.003513137	0	0	4	1756
GO:0048519 negative regulation of biological process	6	0.000777215	100	0.001	Biological Process	GO:0048519	negative regulation of biological process	0.000777215	0.003517168	0	0	6	6054
GO:0034332 adherens junction organization	2	0.000781887	33.333	0.014	Biological Process	GO:0034332	adherens junction organization	0.000781887	0.003530173	0	0	2	146
GO:0031344 regulation of cell projection organization	3	0.000796775	50	0.004	Biological Process	GO:0031344	regulation of cell projection organization	0.000796775	0.003580931	0	0	3	701
GO:0032990 cell part morphogenesis	3	0.000796775	50	0.004	Biological Process	GO:0032990	cell part morphogenesis	0.000796775	0.003580931	0	0	3	701
GO:0042542 response to hydrogen peroxide	2	0.000803314	33.333	0.014	Biological Process	GO:0042542	response to hydrogen peroxide	0.000803314	0.003593871	0	0	2	148
GO:0044344 cellular response to fibroblast growth factor stimulus	2	0.000803314	33.333	0.014	Biological Process	GO:0044344	cellular response to fibroblast growth factor stimulus	0.000803314	0.003593871	0	0	2	148
GO:0008286 insulin receptor signaling pathway	2	0.000814135	33.333	0.013	Biological Process	GO:0008286	insulin receptor signaling pathway	0.000814135	0.003625761	0	0	2	149
GO:0045834 positive regulation of lipid metabolic process	2	0.000814135	33.333	0.013	Biological Process	GO:0045834	positive regulation of lipid metabolic process	0.000814135	0.003625761	0	0	2	149
GO:0007267 cell-cell signaling	4	0.000826749	66.667	0.002	Biological Process	GO:0007267	cell-cell signaling	0.000826749	0.00367361	0	0	4	1786
GO:0062013 positive regulation of small molecule metabolic process	2	0.000835988	33.333	0.013	Biological Process	GO:0062013	positive regulation of small molecule metabolic process	0.000835988	0.003706277	0	0	2	151
GO:0006606 protein import into nucleus	2	0.000847021	33.333	0.013	Biological Process	GO:0006606	protein import into nucleus	0.000847021	0.003746733	0	0	2	152
GO:0043065 positive regulation of apoptotic process	3	0.000858051	50	0.004	Biological Process	GO:0043065	positive regulation of apoptotic process	0.000858051	0.003786994	0	0	3	719
GO:0071774 response to fibroblast growth factor	2	0.000880545	33.333	0.013	Biological Process	GO:0071774	response to fibroblast growth factor	0.000880545	0.003824403	0	0	2	155
GO:0002694 regulation of leukocyte activation	3	0.000882679	50	0.004	Biological Process	GO:0002694	regulation of leukocyte activation	0.000882679	0.003824403	0	0	3	726
GO:0031325 positive regulation of cellular metabolic process	5	0.000888032	83.333	0.001	Biological Process	GO:0031325	positive regulation of cellular metabolic process	0.000888032	0.003824403	0	0	5	3534
GO:0043068 positive regulation of programmed cell death	3	0.000889799	50	0.004	Biological Process	GO:0043068	positive regulation of programmed cell death	0.000889799	0.003824403	0	0	3	728
GO:0040008 regulation of growth	3	0.000900548	50	0.004	Biological Process	GO:0040008	regulation of growth	0.000900548	0.003824403	0	0	3	731
GO:0015960 diadenosine polyphosphate biosynthetic process	1	0.000901578	16.667	0.333	Biological Process	GO:0015960	diadenosine polyphosphate biosynthetic process	0.000901578	0.003824403	0	0	1	3
GO:0015965 diadenosine tetraphosphate metabolic process	1	0.000901578	16.667	0.333	Biological Process	GO:0015965	diadenosine tetraphosphate metabolic process	0.000901578	0.003824403	0	0	1	3
GO:0015966 diadenosine tetraphosphate biosynthetic process	1	0.000901578	16.667	0.333	Biological Process	GO:0015966	diadenosine tetraphosphate biosynthetic process	0.000901578	0.003824403	0	0	1	3
GO:0038086 VEGF-activated platelet-derived growth factor receptor signaling pathway	1	0.000901578	16.667	0.333	Biological Process	GO:0038086	VEGF-activated platelet-derived growth factor receptor signaling pathway	0.000901578	0.003824403	0	0	1	3
GO:0038091 positive regulation of cell proliferation by VEGF-activated platelet derived growth factor receptor signaling pathway	1	0.000901578	16.667	0.333	Biological Process	GO:0038091	positive regulation of cell proliferation by VEGF-activated platelet derived growth factor receptor signaling pathway	0.000901578	0.003824403	0	0	1	3
GO:0060948 cardiac vascular smooth muscle cell development	1	0.000901578	16.667	0.333	Biological Process	GO:0060948	cardiac vascular smooth muscle cell development	0.000901578	0.003824403	0	0	1	3
GO:0071393 cellular response to progesterone stimulus	1	0.000901578	16.667	0.333	Biological Process	GO:0071393	cellular response to progesterone stimulus	0.000901578	0.003824403	0	0	1	3
GO:0097532 stress response to acid chemical	1	0.000901578	16.667	0.333	Biological Process	GO:0097532	stress response to acid chemical	0.000901578	0.003824403	0	0	1	3
GO:0097533 cellular stress response to acid chemical	1	0.000901578	16.667	0.333	Biological Process	GO:0097533	cellular stress response to acid chemical	0.000901578	0.003824403	0	0	1	3
GO:1990418 response to insulin-like growth factor stimulus	1	0.000901578	16.667	0.333	Biological Process	GO:1990418	response to insulin-like growth factor stimulus	0.000901578	0.003824403	0	0	1	3
GO:2000196 positive regulation of female gonad development	1	0.000901578	16.667	0.333	Biological Process	GO:2000196	positive regulation of female gonad development	0.000901578	0.003824403	0	0	1	3
GO:2000588 positive regulation of platelet-derived growth factor receptor-beta signaling pathway	1	0.000901578	16.667	0.333	Biological Process	GO:2000588	positive regulation of platelet-derived growth factor receptor-beta signaling pathway	0.000901578	0.003824403	0	0	1	3
GO:2000676 positive regulation of type B pancreatic cell apoptotic process	1	0.000901578	16.667	0.333	Biological Process	GO:2000676	positive regulation of type B pancreatic cell apoptotic process	0.000901578	0.003824403	0	0	1	3
GO:0009611 response to wounding	3	0.000904149	50	0.004	Biological Process	GO:0009611	response to wounding	0.000904149	0.003827046	0	0	3	732
GO:0001890 placenta development	2	0.000914705	33.333	0.013	Biological Process	GO:0001890	placenta development	0.000914705	0.003855109	0	0	2	158
GO:0071236 cellular response to antibiotic	2	0.000914705	33.333	0.013	Biological Process	GO:0071236	cellular response to antibiotic	0.000914705	0.003855109	0	0	2	158
GO:0010604 positive regulation of macromolecule metabolic process	5	0.000926284	83.333	0.001	Biological Process	GO:0010604	positive regulation of macromolecule metabolic process	0.000926284	0.00389555	0	0	5	3565
GO:0034250 positive regulation of cellular amide metabolic process	2	0.000949501	33.333	0.012	Biological Process	GO:0034250	positive regulation of cellular amide metabolic process	0.000949501	0.003984659	0	0	2	161
GO:0048585 negative regulation of response to stimulus	4	0.000958507	66.667	0.002	Biological Process	GO:0048585	negative regulation of response to stimulus	0.000958507	0.004007253	0	0	4	1856
GO:0048754 branching morphogenesis of an epithelial tube	2	0.000961241	33.333	0.012	Biological Process	GO:0048754	branching morphogenesis of an epithelial tube	0.000961241	0.004007253	0	0	2	162
GO:0007268 chemical synaptic transmission	3	0.000963047	50	0.004	Biological Process	GO:0007268	chemical synaptic transmission	0.000963047	0.004007253	0	0	3	748
GO:0098916 anterograde trans-synaptic signaling	3	0.000963047	50	0.004	Biological Process	GO:0098916	anterograde trans-synaptic signaling	0.000963047	0.004007253	0	0	3	748
GO:0043535 regulation of blood vessel endothelial cell migration	2	0.000984933	33.333	0.012	Biological Process	GO:0043535	regulation of blood vessel endothelial cell migration	0.000984933	0.004089656	0	0	2	164
GO:0000904 cell morphogenesis involved in differentiation	3	0.000993402	50	0.004	Biological Process	GO:0000904	cell morphogenesis involved in differentiation	0.000993402	0.004095302	0	0	3	756
GO:0030260 entry into host cell	2	0.000996884	33.333	0.012	Biological Process	GO:0030260	entry into host cell	0.000996884	0.004095302	0	0	2	165
GO:0044409 entry into host	2	0.000996884	33.333	0.012	Biological Process	GO:0044409	entry into host	0.000996884	0.004095302	0	0	2	165
GO:0051806 entry into cell of other organism involved in symbiotic interaction	2	0.000996884	33.333	0.012	Biological Process	GO:0051806	entry into cell of other organism involved in symbiotic interaction	0.000996884	0.004095302	0	0	2	165
GO:0051828 entry into other organism involved in symbiotic interaction	2	0.000996884	33.333	0.012	Biological Process	GO:0051828	entry into other organism involved in symbiotic interaction	0.000996884	0.004095302	0	0	2	165
GO:0046903 secretion	4	0.000998803	66.667	0.002	Biological Process	GO:0046903	secretion	0.000998803	0.004095302	0	0	4	1876
GO:0099537 trans-synaptic signaling	3	0.001001086	50	0.004	Biological Process	GO:0099537	trans-synaptic signaling	0.001001086	0.004096109	0	0	3	758
GO:0002262 myeloid cell homeostasis	2	0.001008906	33.333	0.012	Biological Process	GO:0002262	myeloid cell homeostasis	0.001008906	0.004119524	0	0	2	166
GO:0006796 phosphate-containing compound metabolic process	5	0.001012026	83.333	0.001	Biological Process	GO:0006796	phosphate-containing compound metabolic process	0.001012026	0.00412369	0	0	5	3631
GO:1905952 regulation of lipid localization	2	0.001020998	33.333	0.012	Biological Process	GO:1905952	regulation of lipid localization	0.001020998	0.004151636	0	0	2	167
GO:0099536 synaptic signaling	3	0.001024368	50	0.004	Biological Process	GO:0099536	synaptic signaling	0.001024368	0.004156734	0	0	3	764
GO:0002433 immune response-regulating cell surface receptor signaling pathway involved in phagocytosis	2	0.001033161	33.333	0.012	Biological Process	GO:0002433	immune response-regulating cell surface receptor signaling pathway involved in phagocytosis	0.001033161	0.00417516	0	0	2	168
GO:0038096 Fc-gamma receptor signaling pathway involved in phagocytosis	2	0.001033161	33.333	0.012	Biological Process	GO:0038096	Fc-gamma receptor signaling pathway involved in phagocytosis	0.001033161	0.00417516	0	0	2	168
GO:0048856 anatomical structure development	6	0.001037051	100	0.001	Biological Process	GO:0048856	anatomical structure development	0.001037051	0.004182277	0	0	6	6352
GO:0006793 phosphorus metabolic process	5	0.001048842	83.333	0.001	Biological Process	GO:0006793	phosphorus metabolic process	0.001048842	0.004221161	0	0	5	3658
GO:0002274 myeloid leukocyte activation	3	0.001067955	50	0.004	Biological Process	GO:0002274	myeloid leukocyte activation	0.001067955	0.004280462	0	0	3	775
GO:2001236 regulation of extrinsic apoptotic signaling pathway	2	0.001070071	33.333	0.012	Biological Process	GO:2001236	regulation of extrinsic apoptotic signaling pathway	0.001070071	0.004280462	0	0	2	171
GO:0010941 regulation of cell death	4	0.001070115	66.667	0.002	Biological Process	GO:0010941	regulation of cell death	0.001070115	0.004280462	0	0	4	1910
GO:0050865 regulation of cell activation	3	0.001076007	50	0.004	Biological Process	GO:0050865	regulation of cell activation	0.001076007	0.004295278	0	0	3	777
GO:0035051 cardiocyte differentiation	2	0.001082515	33.333	0.012	Biological Process	GO:0035051	cardiocyte differentiation	0.001082515	0.004303762	0	0	2	172
GO:0038094 Fc-gamma receptor signaling pathway	2	0.001082515	33.333	0.012	Biological Process	GO:0038094	Fc-gamma receptor signaling pathway	0.001082515	0.004303762	0	0	2	172
GO:0002431 Fc receptor mediated stimulatory signaling pathway	2	0.001095029	33.333	0.012	Biological Process	GO:0002431	Fc receptor mediated stimulatory signaling pathway	0.001095029	0.00433596	0	0	2	173
GO:0016482 cytosolic transport	2	0.001095029	33.333	0.012	Biological Process	GO:0016482	cytosolic transport	0.001095029	0.00433596	0	0	2	173
GO:0010942 positive regulation of cell death	3	0.001100395	50	0.004	Biological Process	GO:0010942	positive regulation of cell death	0.001100395	0.004348443	0	0	3	783
GO:0000723 telomere maintenance	2	0.001107613	33.333	0.011	Biological Process	GO:0000723	telomere maintenance	0.001107613	0.004368177	0	0	2	174
GO:0051223 regulation of protein transport	3	0.001112722	50	0.004	Biological Process	GO:0051223	regulation of protein transport	0.001112722	0.004379531	0	0	3	786
GO:0051170 import into nucleus	2	0.001132992	33.333	0.011	Biological Process	GO:0051170	import into nucleus	0.001132992	0.004450394	0	0	2	176
GO:0031960 response to corticosteroid	2	0.001145787	33.333	0.011	Biological Process	GO:0031960	response to corticosteroid	0.001145787	0.004491668	0	0	2	177
GO:0001936 regulation of endothelial cell proliferation	2	0.001158652	33.333	0.011	Biological Process	GO:0001936	regulation of endothelial cell proliferation	0.001158652	0.004515064	0	0	2	178
GO:0003018 vascular process in circulatory system	2	0.001158652	33.333	0.011	Biological Process	GO:0003018	vascular process in circulatory system	0.001158652	0.004515064	0	0	2	178
GO:2001242 regulation of intrinsic apoptotic signaling pathway	2	0.001158652	33.333	0.011	Biological Process	GO:2001242	regulation of intrinsic apoptotic signaling pathway	0.001158652	0.004515064	0	0	2	178
GO:0051219 phosphoprotein binding	2	0.000241731	33.333	0.024	Molecular Function	GO:0051219	phosphoprotein binding	0.000241731	0.004552594	0	0	2	82
GO:0006412 translation	3	0.001197182	50	0.004	Biological Process	GO:0006412	translation	0.001197182	0.004583759	0	0	3	806
GO:0030307 positive regulation of cell growth	2	0.001197667	33.333	0.011	Biological Process	GO:0030307	positive regulation of cell growth	0.001197667	0.004583759	0	0	2	181
GO:0010746 regulation of plasma membrane long-chain fatty acid transport	1	0.001201953	16.667	0.25	Biological Process	GO:0010746	regulation of plasma membrane long-chain fatty acid transport	0.001201953	0.004583759	0	0	1	4
GO:0010748 negative regulation of plasma membrane long-chain fatty acid transport	1	0.001201953	16.667	0.25	Biological Process	GO:0010748	negative regulation of plasma membrane long-chain fatty acid transport	0.001201953	0.004583759	0	0	1	4
GO:0032079 positive regulation of endodeoxyribonuclease activity	1	0.001201953	16.667	0.25	Biological Process	GO:0032079	positive regulation of endodeoxyribonuclease activity	0.001201953	0.004583759	0	0	1	4
GO:0035633 maintenance of permeability of blood-brain barrier	1	0.001201953	16.667	0.25	Biological Process	GO:0035633	maintenance of permeability of blood-brain barrier	0.001201953	0.004583759	0	0	1	4
GO:0038189 neuropilin signaling pathway	1	0.001201953	16.667	0.25	Biological Process	GO:0038189	neuropilin signaling pathway	0.001201953	0.004583759	0	0	1	4
GO:0045079 negative regulation of chemokine biosynthetic process	1	0.001201953	16.667	0.25	Biological Process	GO:0045079	negative regulation of chemokine biosynthetic process	0.001201953	0.004583759	0	0	1	4
GO:0060319 primitive erythrocyte differentiation	1	0.001201953	16.667	0.25	Biological Process	GO:0060319	primitive erythrocyte differentiation	0.001201953	0.004583759	0	0	1	4
GO:0089700 protein kinase D signaling	1	0.001201953	16.667	0.25	Biological Process	GO:0089700	protein kinase D signaling	0.001201953	0.004583759	0	0	1	4
GO:0090170 regulation of Golgi inheritance	1	0.001201953	16.667	0.25	Biological Process	GO:0090170	regulation of Golgi inheritance	0.001201953	0.004583759	0	0	1	4
GO:0008361 regulation of cell size	2	0.001224027	33.333	0.011	Biological Process	GO:0008361	regulation of cell size	0.001224027	0.004649882	0	0	2	183
GO:0048771 tissue remodeling	2	0.001224027	33.333	0.011	Biological Process	GO:0048771	tissue remodeling	0.001224027	0.004649882	0	0	2	183
GO:0090087 regulation of peptide transport	3	0.001249785	50	0.004	Biological Process	GO:0090087	regulation of peptide transport	0.001249785	0.004732773	0	0	3	818
GO:0048660 regulation of smooth muscle cell proliferation	2	0.001250667	33.333	0.011	Biological Process	GO:0048660	regulation of smooth muscle cell proliferation	0.001250667	0.004732773	0	0	2	185
GO:0032200 telomere organization	2	0.001277586	33.333	0.011	Biological Process	GO:0032200	telomere organization	0.001277586	0.004806855	0	0	2	187
GO:0048659 smooth muscle cell proliferation	2	0.001277586	33.333	0.011	Biological Process	GO:0048659	smooth muscle cell proliferation	0.001277586	0.004806855	0	0	2	187
GO:2001252 positive regulation of chromosome organization	2	0.001277586	33.333	0.011	Biological Process	GO:2001252	positive regulation of chromosome organization	0.001277586	0.004806855	0	0	2	187
GO:0007049 cell cycle	4	0.001288974	66.667	0.002	Biological Process	GO:0007049	cell cycle	0.001288974	0.004839348	0	0	4	2005
GO:0030324 lung development	2	0.00129115	33.333	0.011	Biological Process	GO:0030324	lung development	0.00129115	0.004839348	0	0	2	188
GO:0043534 blood vessel endothelial cell migration	2	0.001304784	33.333	0.011	Biological Process	GO:0043534	blood vessel endothelial cell migration	0.001304784	0.004881135	0	0	2	189
GO:0043043 peptide biosynthetic process	3	0.001308427	50	0.004	Biological Process	GO:0043043	peptide biosynthetic process	0.001308427	0.004885459	0	0	3	831
GO:0070201 regulation of establishment of protein localization	3	0.001326821	50	0.004	Biological Process	GO:0070201	regulation of establishment of protein localization	0.001326821	0.004944736	0	0	3	835
GO:0002040 sprouting angiogenesis	2	0.001346105	33.333	0.01	Biological Process	GO:0002040	sprouting angiogenesis	0.001346105	0.004989661	0	0	2	192
GO:0030323 respiratory tube development	2	0.001346105	33.333	0.01	Biological Process	GO:0030323	respiratory tube development	0.001346105	0.004989661	0	0	2	192
GO:0045595 regulation of cell differentiation	4	0.001346497	66.667	0.002	Biological Process	GO:0045595	regulation of cell differentiation	0.001346497	0.004989661	0	0	4	2028
GO:0006355 regulation of transcription, DNA-templated	5	0.001352009	83.333	0.001	Biological Process	GO:0006355	regulation of transcription, DNA-templated	0.001352009	0.005000651	0	0	5	3856
GO:0009893 positive regulation of metabolic process	5	0.001363857	83.333	0.001	Biological Process	GO:0009893	positive regulation of metabolic process	0.001363857	0.00503499	0	0	5	3863
GO:0080135 regulation of cellular response to stress	3	0.00137353	50	0.004	Biological Process	GO:0080135	regulation of cellular response to stress	0.00137353	0.005043992	0	0	3	845
GO:0001935 endothelial cell proliferation	2	0.001374	33.333	0.01	Biological Process	GO:0001935	endothelial cell proliferation	0.001374	0.005043992	0	0	2	194
GO:0061138 morphogenesis of a branching epithelium	2	0.001374	33.333	0.01	Biological Process	GO:0061138	morphogenesis of a branching epithelium	0.001374	0.005043992	0	0	2	194
GO:0071897 DNA biosynthetic process	2	0.001444956	33.333	0.01	Biological Process	GO:0071897	DNA biosynthetic process	0.001444956	0.005294578	0	0	2	199
GO:1903506 regulation of nucleic acid-templated transcription	5	0.001454432	83.333	0.001	Biological Process	GO:1903506	regulation of nucleic acid-templated transcription	0.001454432	0.005319374	0	0	5	3915
GO:0050767 regulation of neurogenesis	3	0.001460247	50	0.003	Biological Process	GO:0050767	regulation of neurogenesis	0.001460247	0.005330715	0	0	3	863
GO:2001141 regulation of RNA biosynthetic process	5	0.001479602	83.333	0.001	Biological Process	GO:2001141	regulation of RNA biosynthetic process	0.001479602	0.005357233	0	0	5	3929
GO:0009408 response to heat	2	0.001488363	33.333	0.01	Biological Process	GO:0009408	response to heat	0.001488363	0.005357233	0	0	2	202
GO:0071248 cellular response to metal ion	2	0.001488363	33.333	0.01	Biological Process	GO:0071248	cellular response to metal ion	0.001488363	0.005357233	0	0	2	202
GO:0015911 plasma membrane long-chain fatty acid transport	1	0.001502253	16.667	0.2	Biological Process	GO:0015911	plasma membrane long-chain fatty acid transport	0.001502253	0.005357233	0	0	1	5
GO:0031999 negative regulation of fatty acid beta-oxidation	1	0.001502253	16.667	0.2	Biological Process	GO:0031999	negative regulation of fatty acid beta-oxidation	0.001502253	0.005357233	0	0	1	5
GO:0032077 positive regulation of deoxyribonuclease activity	1	0.001502253	16.667	0.2	Biological Process	GO:0032077	positive regulation of deoxyribonuclease activity	0.001502253	0.005357233	0	0	1	5
GO:0038033 positive regulation of endothelial cell chemotaxis by VEGF-activated vascular endothelial growth factor receptor signaling pathway	1	0.001502253	16.667	0.2	Biological Process	GO:0038033	positive regulation of endothelial cell chemotaxis by VEGF-activated vascular endothelial growth factor receptor signaling pathway	0.001502253	0.005357233	0	0	1	5
GO:0072656 maintenance of protein location in mitochondrion	1	0.001502253	16.667	0.2	Biological Process	GO:0072656	maintenance of protein location in mitochondrion	0.001502253	0.005357233	0	0	1	5
GO:0090259 regulation of retinal ganglion cell axon guidance	1	0.001502253	16.667	0.2	Biological Process	GO:0090259	regulation of retinal ganglion cell axon guidance	0.001502253	0.005357233	0	0	1	5
GO:1900086 positive regulation of peptidyl-tyrosine autophosphorylation	1	0.001502253	16.667	0.2	Biological Process	GO:1900086	positive regulation of peptidyl-tyrosine autophosphorylation	0.001502253	0.005357233	0	0	1	5
GO:1903721 positive regulation of I-kappaB phosphorylation	1	0.001502253	16.667	0.2	Biological Process	GO:1903721	positive regulation of I-kappaB phosphorylation	0.001502253	0.005357233	0	0	1	5
GO:2000660 negative regulation of interleukin-1-mediated signaling pathway	1	0.001502253	16.667	0.2	Biological Process	GO:2000660	negative regulation of interleukin-1-mediated signaling pathway	0.001502253	0.005357233	0	0	1	5
GO:0030278 regulation of ossification	2	0.001502971	33.333	0.01	Biological Process	GO:0030278	regulation of ossification	0.001502971	0.005357233	0	0	2	203
GO:0006109 regulation of carbohydrate metabolic process	2	0.001532395	33.333	0.01	Biological Process	GO:0006109	regulation of carbohydrate metabolic process	0.001532395	0.005442358	0	0	2	205
GO:0045766 positive regulation of angiogenesis	2	0.001532395	33.333	0.01	Biological Process	GO:0045766	positive regulation of angiogenesis	0.001532395	0.005442358	0	0	2	205
GO:0035265 organ growth	2	0.001547211	33.333	0.01	Biological Process	GO:0035265	organ growth	0.001547211	0.005475175	0	0	2	206
GO:0043112 receptor metabolic process	2	0.001547211	33.333	0.01	Biological Process	GO:0043112	receptor metabolic process	0.001547211	0.005475175	0	0	2	206
GO:0048609 multicellular organismal reproductive process	3	0.001550407	50	0.003	Biological Process	GO:0048609	multicellular organismal reproductive process	0.001550407	0.005476616	0	0	3	881
GO:0043086 negative regulation of catalytic activity	3	0.001565772	50	0.003	Biological Process	GO:0043086	negative regulation of catalytic activity	0.001565772	0.005520963	0	0	3	884
GO:0001763 morphogenesis of a branching structure	2	0.00157705	33.333	0.01	Biological Process	GO:0001763	morphogenesis of a branching structure	0.00157705	0.005540835	0	0	2	208
GO:0007565 female pregnancy	2	0.00157705	33.333	0.01	Biological Process	GO:0007565	female pregnancy	0.00157705	0.005540835	0	0	2	208
GO:0010608 posttranscriptional regulation of gene expression	3	0.001591598	50	0.003	Biological Process	GO:0010608	posttranscriptional regulation of gene expression	0.001591598	0.00558196	0	0	3	889
GO:0032502 developmental process	6	0.001602999	100	0.001	Biological Process	GO:0032502	developmental process	0.001602999	0.005611927	0	0	6	6830
GO:0050679 positive regulation of epithelial cell proliferation	2	0.001607167	33.333	0.01	Biological Process	GO:0050679	positive regulation of epithelial cell proliferation	0.001607167	0.005616504	0	0	2	210
GO:0032504 multicellular organism reproduction	3	0.00163877	50	0.003	Biological Process	GO:0032504	multicellular organism reproduction	0.00163877	0.005716774	0	0	3	898
GO:0017038 protein import	2	0.001652859	33.333	0.009	Biological Process	GO:0017038	protein import	0.001652859	0.005755702	0	0	2	213
GO:0046649 lymphocyte activation	3	0.00166536	50	0.003	Biological Process	GO:0046649	lymphocyte activation	0.00166536	0.005788694	0	0	3	903
GO:0006006 glucose metabolic process	2	0.001668229	33.333	0.009	Biological Process	GO:0006006	glucose metabolic process	0.001668229	0.005788694	0	0	2	214
GO:0048518 positive regulation of biological process	6	0.001679125	100	0.001	Biological Process	GO:0048518	positive regulation of biological process	0.001679125	0.005816229	0	0	6	6883
GO:0060541 respiratory system development	2	0.001683667	33.333	0.009	Biological Process	GO:0060541	respiratory system development	0.001683667	0.005821693	0	0	2	215
GO:1901654 response to ketone	2	0.001699174	33.333	0.009	Biological Process	GO:1901654	response to ketone	0.001699174	0.005864987	0	0	2	216
GO:0006351 transcription, DNA-templated	5	0.001723835	83.333	0.001	Biological Process	GO:0006351	transcription, DNA-templated	0.001723835	0.00593967	0	0	5	4056
GO:0009612 response to mechanical stimulus	2	0.001746109	33.333	0.009	Biological Process	GO:0009612	response to mechanical stimulus	0.001746109	0.006005881	0	0	2	219
GO:0048018 receptor ligand activity	3	0.000375876	50	0.005	Molecular Function	GO:0048018	receptor ligand activity	0.000375876	0.006067717	0	0	3	549
GO:0048762 mesenchymal cell differentiation	2	0.001793664	33.333	0.009	Biological Process	GO:0048762	mesenchymal cell differentiation	0.001793664	0.006072156	0	0	2	222
GO:0010641 positive regulation of platelet-derived growth factor receptor signaling pathway	1	0.001802478	16.667	0.167	Biological Process	GO:0010641	positive regulation of platelet-derived growth factor receptor signaling pathway	0.001802478	0.006072156	0	0	1	6
GO:0051902 negative regulation of mitochondrial depolarization	1	0.001802478	16.667	0.167	Biological Process	GO:0051902	negative regulation of mitochondrial depolarization	0.001802478	0.006072156	0	0	1	6
GO:0060440 trachea formation	1	0.001802478	16.667	0.167	Biological Process	GO:0060440	trachea formation	0.001802478	0.006072156	0	0	1	6
GO:0060754 positive regulation of mast cell chemotaxis	1	0.001802478	16.667	0.167	Biological Process	GO:0060754	positive regulation of mast cell chemotaxis	0.001802478	0.006072156	0	0	1	6
GO:0061419 positive regulation of transcription from RNA polymerase II promoter in response to hypoxia	1	0.001802478	16.667	0.167	Biological Process	GO:0061419	positive regulation of transcription from RNA polymerase II promoter in response to hypoxia	0.001802478	0.006072156	0	0	1	6
GO:0070141 response to UV-A	1	0.001802478	16.667	0.167	Biological Process	GO:0070141	response to UV-A	0.001802478	0.006072156	0	0	1	6
GO:1900084 regulation of peptidyl-tyrosine autophosphorylation	1	0.001802478	16.667	0.167	Biological Process	GO:1900084	regulation of peptidyl-tyrosine autophosphorylation	0.001802478	0.006072156	0	0	1	6
GO:1901727 positive regulation of histone deacetylase activity	1	0.001802478	16.667	0.167	Biological Process	GO:1901727	positive regulation of histone deacetylase activity	0.001802478	0.006072156	0	0	1	6
GO:1903719 regulation of I-kappaB phosphorylation	1	0.001802478	16.667	0.167	Biological Process	GO:1903719	regulation of I-kappaB phosphorylation	0.001802478	0.006072156	0	0	1	6
GO:2000354 regulation of ovarian follicle development	1	0.001802478	16.667	0.167	Biological Process	GO:2000354	regulation of ovarian follicle development	0.001802478	0.006072156	0	0	1	6
GO:2001286 regulation of caveolin-mediated endocytosis	1	0.001802478	16.667	0.167	Biological Process	GO:2001286	regulation of caveolin-mediated endocytosis	0.001802478	0.006072156	0	0	1	6
GO:0010810 regulation of cell-substrate adhesion	2	0.001809653	33.333	0.009	Biological Process	GO:0010810	regulation of cell-substrate adhesion	0.001809653	0.006085889	0	0	2	223
GO:0097659 nucleic acid-templated transcription	5	0.001815412	83.333	0.001	Biological Process	GO:0097659	nucleic acid-templated transcription	0.001815412	0.006094819	0	0	5	4100
GO:0060341 regulation of cellular localization	3	0.001825048	50	0.003	Biological Process	GO:0060341	regulation of cellular localization	0.001825048	0.006108513	0	0	3	932
GO:0071347 cellular response to interleukin-1	2	0.001825711	33.333	0.009	Biological Process	GO:0071347	cellular response to interleukin-1	0.001825711	0.006108513	0	0	2	224
GO:0098609 cell-cell adhesion	3	0.001836408	50	0.003	Biological Process	GO:0098609	cell-cell adhesion	0.001836408	0.006133853	0	0	3	934
GO:0015031 protein transport	4	0.001856591	66.667	0.002	Biological Process	GO:0015031	protein transport	0.001856591	0.006185048	0	0	4	2206
GO:0008406 gonad development	2	0.001858034	33.333	0.009	Biological Process	GO:0008406	gonad development	0.001858034	0.006185048	0	0	2	226
GO:0032774 RNA biosynthetic process	5	0.001866938	83.333	0.001	Biological Process	GO:0032774	RNA biosynthetic process	0.001866938	0.006204175	0	0	5	4124
GO:0043393 regulation of protein binding	2	0.001874298	33.333	0.009	Biological Process	GO:0043393	regulation of protein binding	0.001874298	0.00621811	0	0	2	227
GO:0001649 osteoblast differentiation	2	0.001890631	33.333	0.009	Biological Process	GO:0001649	osteoblast differentiation	0.001890631	0.006261718	0	0	2	228
GO:0007165 signal transduction	6	0.001920893	100	0.001	Biological Process	GO:0007165	signal transduction	0.001920893	0.006349174	0	0	6	7039
GO:0032869 cellular response to insulin stimulus	2	0.001923502	33.333	0.009	Biological Process	GO:0032869	cellular response to insulin stimulus	0.001923502	0.006349174	0	0	2	230
GO:0071241 cellular response to inorganic substance	2	0.001940041	33.333	0.009	Biological Process	GO:0071241	cellular response to inorganic substance	0.001940041	0.006393021	0	0	2	231
GO:0010594 regulation of endothelial cell migration	2	0.001956648	33.333	0.009	Biological Process	GO:0010594	regulation of endothelial cell migration	0.001956648	0.006426183	0	0	2	232
GO:0045137 development of primary sexual characteristics	2	0.001956648	33.333	0.009	Biological Process	GO:0045137	development of primary sexual characteristics	0.001956648	0.006426183	0	0	2	232
GO:0016032 viral process	3	0.001970318	50	0.003	Biological Process	GO:0016032	viral process	0.001970318	0.006460275	0	0	3	957
GO:0015833 peptide transport	4	0.001991443	66.667	0.002	Biological Process	GO:0015833	peptide transport	0.001991443	0.006516904	0	0	4	2247
GO:0030162 regulation of proteolysis	3	0.001994226	50	0.003	Biological Process	GO:0030162	regulation of proteolysis	0.001994226	0.006516904	0	0	3	961
GO:1904018 positive regulation of vasculature development	2	0.002006881	33.333	0.009	Biological Process	GO:1904018	positive regulation of vasculature development	0.002006881	0.006546456	0	0	2	235
GO:0051252 regulation of RNA metabolic process	5	0.002009935	83.333	0.001	Biological Process	GO:0051252	regulation of RNA metabolic process	0.002009935	0.006546456	0	0	5	4188
GO:0002573 myeloid leukocyte differentiation	2	0.002023762	33.333	0.008	Biological Process	GO:0002573	myeloid leukocyte differentiation	0.002023762	0.006580577	0	0	2	236
GO:0051960 regulation of nervous system development	3	0.002060926	50	0.003	Biological Process	GO:0051960	regulation of nervous system development	0.002060926	0.006670619	0	0	3	972
GO:0033365 protein localization to organelle	3	0.002067059	50	0.003	Biological Process	GO:0033365	protein localization to organelle	0.002067059	0.006670619	0	0	3	973
GO:0015959 diadenosine polyphosphate metabolic process	1	0.002102628	16.667	0.143	Biological Process	GO:0015959	diadenosine polyphosphate metabolic process	0.002102628	0.006670619	0	0	1	7
GO:0031077 post-embryonic camera-type eye development	1	0.002102628	16.667	0.143	Biological Process	GO:0031077	post-embryonic camera-type eye development	0.002102628	0.006670619	0	0	1	7
GO:0032287 peripheral nervous system myelin maintenance	1	0.002102628	16.667	0.143	Biological Process	GO:0032287	peripheral nervous system myelin maintenance	0.002102628	0.006670619	0	0	1	7
GO:0038089 positive regulation of cell migration by vascular endothelial growth factor signaling pathway	1	0.002102628	16.667	0.143	Biological Process	GO:0038089	positive regulation of cell migration by vascular endothelial growth factor signaling pathway	0.002102628	0.006670619	0	0	1	7
GO:0048842 positive regulation of axon extension involved in axon guidance	1	0.002102628	16.667	0.143	Biological Process	GO:0048842	positive regulation of axon extension involved in axon guidance	0.002102628	0.006670619	0	0	1	7
GO:0060753 regulation of mast cell chemotaxis	1	0.002102628	16.667	0.143	Biological Process	GO:0060753	regulation of mast cell chemotaxis	0.002102628	0.006670619	0	0	1	7
GO:0097475 motor neuron migration	1	0.002102628	16.667	0.143	Biological Process	GO:0097475	motor neuron migration	0.002102628	0.006670619	0	0	1	7
GO:1903997 positive regulation of non-membrane spanning protein tyrosine kinase activity	1	0.002102628	16.667	0.143	Biological Process	GO:1903997	positive regulation of non-membrane spanning protein tyrosine kinase activity	0.002102628	0.006670619	0	0	1	7
GO:1904180 negative regulation of membrane depolarization	1	0.002102628	16.667	0.143	Biological Process	GO:1904180	negative regulation of membrane depolarization	0.002102628	0.006670619	0	0	1	7
GO:2000394 positive regulation of lamellipodium morphogenesis	1	0.002102628	16.667	0.143	Biological Process	GO:2000394	positive regulation of lamellipodium morphogenesis	0.002102628	0.006670619	0	0	1	7
GO:2000535 regulation of entry of bacterium into host cell	1	0.002102628	16.667	0.143	Biological Process	GO:2000535	regulation of entry of bacterium into host cell	0.002102628	0.006670619	0	0	1	7
GO:2000553 positive regulation of T-helper 2 cell cytokine production	1	0.002102628	16.667	0.143	Biological Process	GO:2000553	positive regulation of T-helper 2 cell cytokine production	0.002102628	0.006670619	0	0	1	7
GO:2000659 regulation of interleukin-1-mediated signaling pathway	1	0.002102628	16.667	0.143	Biological Process	GO:2000659	regulation of interleukin-1-mediated signaling pathway	0.002102628	0.006670619	0	0	1	7
GO:0044706 multi-multicellular organism process	2	0.002109193	33.333	0.008	Biological Process	GO:0044706	multi-multicellular organism process	0.002109193	0.006670619	0	0	2	241
GO:0048738 cardiac muscle tissue development	2	0.002109193	33.333	0.008	Biological Process	GO:0048738	cardiac muscle tissue development	0.002109193	0.006670619	0	0	2	241
GO:0042886 amide transport	4	0.002119085	66.667	0.002	Biological Process	GO:0042886	amide transport	0.002119085	0.00669113	0	0	4	2284
GO:0006952 defense response	4	0.002140326	66.667	0.002	Biological Process	GO:0006952	defense response	0.002140326	0.006747352	0	0	4	2290
GO:0045444 fat cell differentiation	2	0.002143843	33.333	0.008	Biological Process	GO:0045444	fat cell differentiation	0.002143843	0.006747608	0	0	2	243
GO:0006954 inflammatory response	3	0.002147858	50	0.003	Biological Process	GO:0006954	inflammatory response	0.002147858	0.006749428	0	0	3	986
GO:0030097 hemopoiesis	3	0.002160465	50	0.003	Biological Process	GO:0030097	hemopoiesis	0.002160465	0.006778199	0	0	3	988
GO:0006518 peptide metabolic process	3	0.002166786	50	0.003	Biological Process	GO:0006518	peptide metabolic process	0.002166786	0.006787188	0	0	3	989
GO:0007160 cell-matrix adhesion	2	0.002178766	33.333	0.008	Biological Process	GO:0007160	cell-matrix adhesion	0.002178766	0.006805192	0	0	2	245
GO:0043604 amide biosynthetic process	3	0.002179463	50	0.003	Biological Process	GO:0043604	amide biosynthetic process	0.002179463	0.006805192	0	0	3	991
GO:0030545 receptor regulator activity	3	0.000488056	50	0.005	Molecular Function	GO:0030545	receptor regulator activity	0.000488056	0.006893792	0	0	3	600
GO:0097191 extrinsic apoptotic signaling pathway	2	0.002213962	33.333	0.008	Biological Process	GO:0097191	extrinsic apoptotic signaling pathway	0.002213962	0.006901938	0	0	2	247
GO:0060284 regulation of cell development	3	0.002237099	50	0.003	Biological Process	GO:0060284	regulation of cell development	0.002237099	0.006963014	0	0	3	1000
GO:2001234 negative regulation of apoptotic signaling pathway	2	0.002267266	33.333	0.008	Biological Process	GO:2001234	negative regulation of apoptotic signaling pathway	0.002267266	0.007045743	0	0	2	250
GO:0045184 establishment of protein localization	4	0.002274724	66.667	0.002	Biological Process	GO:0045184	establishment of protein localization	0.002274724	0.007057755	0	0	4	2327
GO:0034329 cell junction assembly	2	0.002375709	33.333	0.008	Biological Process	GO:0034329	cell junction assembly	0.002375709	0.007293519	0	0	2	256
GO:0019318 hexose metabolic process	2	0.00239402	33.333	0.008	Biological Process	GO:0019318	hexose metabolic process	0.00239402	0.007293519	0	0	2	257
GO:0001781 neutrophil apoptotic process	1	0.002402702	16.667	0.125	Biological Process	GO:0001781	neutrophil apoptotic process	0.002402702	0.007293519	0	0	1	8
GO:0007172 signal complex assembly	1	0.002402702	16.667	0.125	Biological Process	GO:0007172	signal complex assembly	0.002402702	0.007293519	0	0	1	8
GO:0032071 regulation of endodeoxyribonuclease activity	1	0.002402702	16.667	0.125	Biological Process	GO:0032071	regulation of endodeoxyribonuclease activity	0.002402702	0.007293519	0	0	1	8
GO:0033625 positive regulation of integrin activation	1	0.002402702	16.667	0.125	Biological Process	GO:0033625	positive regulation of integrin activation	0.002402702	0.007293519	0	0	1	8
GO:0050847 progesterone receptor signaling pathway	1	0.002402702	16.667	0.125	Biological Process	GO:0050847	progesterone receptor signaling pathway	0.002402702	0.007293519	0	0	1	8
GO:0060020 Bergmann glial cell differentiation	1	0.002402702	16.667	0.125	Biological Process	GO:0060020	Bergmann glial cell differentiation	0.002402702	0.007293519	0	0	1	8
GO:0060215 primitive hemopoiesis	1	0.002402702	16.667	0.125	Biological Process	GO:0060215	primitive hemopoiesis	0.002402702	0.007293519	0	0	1	8
GO:0090045 positive regulation of deacetylase activity	1	0.002402702	16.667	0.125	Biological Process	GO:0090045	positive regulation of deacetylase activity	0.002402702	0.007293519	0	0	1	8
GO:0090091 positive regulation of extracellular matrix disassembly	1	0.002402702	16.667	0.125	Biological Process	GO:0090091	positive regulation of extracellular matrix disassembly	0.002402702	0.007293519	0	0	1	8
GO:1902669 positive regulation of axon guidance	1	0.002402702	16.667	0.125	Biological Process	GO:1902669	positive regulation of axon guidance	0.002402702	0.007293519	0	0	1	8
GO:2000192 negative regulation of fatty acid transport	1	0.002402702	16.667	0.125	Biological Process	GO:2000192	negative regulation of fatty acid transport	0.002402702	0.007293519	0	0	1	8
GO:2000586 regulation of platelet-derived growth factor receptor-beta signaling pathway	1	0.002402702	16.667	0.125	Biological Process	GO:2000586	regulation of platelet-derived growth factor receptor-beta signaling pathway	0.002402702	0.007293519	0	0	1	8
GO:0044403 symbiont process	3	0.002443043	50	0.003	Biological Process	GO:0044403	symbiont process	0.002443043	0.007404531	0	0	3	1031
GO:0051701 interaction with host	2	0.002449361	33.333	0.008	Biological Process	GO:0051701	interaction with host	0.002449361	0.007412242	0	0	2	260
GO:2000112 regulation of cellular macromolecule biosynthetic process	5	0.002460969	83.333	0.001	Biological Process	GO:2000112	regulation of cellular macromolecule biosynthetic process	0.002460969	0.007435911	0	0	5	4369
GO:0032101 regulation of response to external stimulus	3	0.002477349	50	0.003	Biological Process	GO:0032101	regulation of response to external stimulus	0.002477349	0.007473907	0	0	3	1036
GO:0051896 regulation of protein kinase B signaling	2	0.002486594	33.333	0.008	Biological Process	GO:0051896	regulation of protein kinase B signaling	0.002486594	0.007490291	0	0	2	262
GO:0065008 regulation of biological quality	5	0.002496159	83.333	0.001	Biological Process	GO:0065008	regulation of biological quality	0.002496159	0.00750759	0	0	5	4382
GO:0009725 response to hormone	3	0.002546879	50	0.003	Biological Process	GO:0009725	response to hormone	0.002546879	0.007648427	0	0	3	1046
GO:0016192 vesicle-mediated transport	4	0.002557575	66.667	0.002	Biological Process	GO:0016192	vesicle-mediated transport	0.002557575	0.007668819	0	0	4	2400
GO:0004672 protein kinase activity	3	0.000668664	50	0.004	Molecular Function	GO:0004672	protein kinase activity	0.000668664	0.007722709	0	0	3	668
GO:0019901 protein kinase binding	3	0.000683426	50	0.004	Molecular Function	GO:0019901	protein kinase binding	0.000683426	0.007722709	0	0	3	673
GO:0051179 localization	6	0.002580825	100	0.001	Biological Process	GO:0051179	localization	0.002580825	0.007726739	0	0	6	7394
GO:0005153 interleukin-8 receptor binding	1	0.000891089	16.667	0.333	Molecular Function	GO:0005153	interleukin-8 receptor binding	0.000891089	0.007824117	0	0	1	3
GO:0043183 vascular endothelial growth factor receptor 1 binding	1	0.000891089	16.667	0.333	Molecular Function	GO:0043183	vascular endothelial growth factor receptor 1 binding	0.000891089	0.007824117	0	0	1	3
GO:0019900 kinase binding	3	0.000952702	50	0.004	Molecular Function	GO:0019900	kinase binding	0.000952702	0.007824117	0	0	3	754
GO:0008083 growth factor activity	2	0.000985814	33.333	0.012	Molecular Function	GO:0008083	growth factor activity	0.000985814	0.007824117	0	0	2	166
GO:0016773 phosphotransferase activity, alcohol group as acceptor	3	0.001043866	50	0.004	Molecular Function	GO:0016773	phosphotransferase activity, alcohol group as acceptor	0.001043866	0.007824117	0	0	3	778
GO:0005102 signaling receptor binding	4	0.00110784	66.667	0.002	Molecular Function	GO:0005102	signaling receptor binding	0.00110784	0.007824117	0	0	4	1950
GO:0009266 response to temperature stimulus	2	0.002619037	33.333	0.007	Biological Process	GO:0009266	response to temperature stimulus	0.002619037	0.007829206	0	0	2	269
GO:0090596 sensory organ morphogenesis	2	0.002638228	33.333	0.007	Biological Process	GO:0090596	sensory organ morphogenesis	0.002638228	0.007865271	0	0	2	270
GO:0045597 positive regulation of cell differentiation	3	0.002639111	50	0.003	Biological Process	GO:0045597	positive regulation of cell differentiation	0.002639111	0.007865271	0	0	3	1059
GO:0007281 germ cell development	2	0.002657485	33.333	0.007	Biological Process	GO:0007281	germ cell development	0.002657485	0.00789158	0	0	2	271
GO:0097237 cellular response to toxic substance	2	0.002676811	33.333	0.007	Biological Process	GO:0097237	cellular response to toxic substance	0.002676811	0.00789158	0	0	2	272
GO:0006924 activation-induced cell death of T cells	1	0.002702701	16.667	0.111	Biological Process	GO:0006924	activation-induced cell death of T cells	0.002702701	0.00789158	0	0	1	9
GO:0035655 interleukin-18-mediated signaling pathway	1	0.002702701	16.667	0.111	Biological Process	GO:0035655	interleukin-18-mediated signaling pathway	0.002702701	0.00789158	0	0	1	9
GO:0042473 outer ear morphogenesis	1	0.002702701	16.667	0.111	Biological Process	GO:0042473	outer ear morphogenesis	0.002702701	0.00789158	0	0	1	9
GO:0048845 venous blood vessel morphogenesis	1	0.002702701	16.667	0.111	Biological Process	GO:0048845	venous blood vessel morphogenesis	0.002702701	0.00789158	0	0	1	9
GO:0060982 coronary artery morphogenesis	1	0.002702701	16.667	0.111	Biological Process	GO:0060982	coronary artery morphogenesis	0.002702701	0.00789158	0	0	1	9
GO:0071351 cellular response to interleukin-18	1	0.002702701	16.667	0.111	Biological Process	GO:0071351	cellular response to interleukin-18	0.002702701	0.00789158	0	0	1	9
GO:0090037 positive regulation of protein kinase C signaling	1	0.002702701	16.667	0.111	Biological Process	GO:0090037	positive regulation of protein kinase C signaling	0.002702701	0.00789158	0	0	1	9
GO:0097084 vascular smooth muscle cell development	1	0.002702701	16.667	0.111	Biological Process	GO:0097084	vascular smooth muscle cell development	0.002702701	0.00789158	0	0	1	9
GO:1901725 regulation of histone deacetylase activity	1	0.002702701	16.667	0.111	Biological Process	GO:1901725	regulation of histone deacetylase activity	0.002702701	0.00789158	0	0	1	9
GO:1903995 regulation of non-membrane spanning protein tyrosine kinase activity	1	0.002702701	16.667	0.111	Biological Process	GO:1903995	regulation of non-membrane spanning protein tyrosine kinase activity	0.002702701	0.00789158	0	0	1	9
GO:2000674 regulation of type B pancreatic cell apoptotic process	1	0.002702701	16.667	0.111	Biological Process	GO:2000674	regulation of type B pancreatic cell apoptotic process	0.002702701	0.00789158	0	0	1	9
GO:0000902 cell morphogenesis	3	0.002704192	50	0.003	Biological Process	GO:0000902	cell morphogenesis	0.002704192	0.00789158	0	0	3	1068
GO:0098772 molecular function regulator	4	0.001213765	66.667	0.002	Molecular Function	GO:0098772	molecular function regulator	0.001213765	0.008067964	0	0	4	1997
GO:0043542 endothelial cell migration	2	0.002813973	33.333	0.007	Biological Process	GO:0043542	endothelial cell migration	0.002813973	0.008199768	0	0	2	279
GO:0044703 multi-organism reproductive process	3	0.002822397	50	0.003	Biological Process	GO:0044703	multi-organism reproductive process	0.002822397	0.00821213	0	0	3	1084
GO:0006464 cellular protein modification process	5	0.002830817	83.333	0.001	Biological Process	GO:0006464	cellular protein modification process	0.002830817	0.008212296	0	0	5	4499
GO:0036211 protein modification process	5	0.002830817	83.333	0.001	Biological Process	GO:0036211	protein modification process	0.002830817	0.008212296	0	0	5	4499
GO:0007548 sex differentiation	2	0.002853767	33.333	0.007	Biological Process	GO:0007548	sex differentiation	0.002853767	0.008266666	0	0	2	281
GO:0019219 regulation of nucleobase-containing compound metabolic process	5	0.002870052	83.333	0.001	Biological Process	GO:0019219	regulation of nucleobase-containing compound metabolic process	0.002870052	0.008301593	0	0	5	4512
GO:0044419 interspecies interaction between organisms	3	0.002875127	50	0.003	Biological Process	GO:0044419	interspecies interaction between organisms	0.002875127	0.008304043	0	0	3	1091
GO:0010556 regulation of macromolecule biosynthetic process	5	0.002882209	83.333	0.001	Biological Process	GO:0010556	regulation of macromolecule biosynthetic process	0.002882209	0.008312272	0	0	5	4516
GO:0023052 signaling	6	0.002890666	100	0.001	Biological Process	GO:0023052	signaling	0.002890666	0.00832135	0	0	6	7535
GO:0060485 mesenchyme development	2	0.00289383	33.333	0.007	Biological Process	GO:0060485	mesenchyme development	0.00289383	0.00832135	0	0	2	283
GO:0042493 response to drug	3	0.002913172	50	0.003	Biological Process	GO:0042493	response to drug	0.002913172	0.008364722	0	0	3	1096
GO:0006259 DNA metabolic process	3	0.002936152	50	0.003	Biological Process	GO:0006259	DNA metabolic process	0.002936152	0.008408623	0	0	3	1099
GO:0007154 cell communication	6	0.002937024	100	0.001	Biological Process	GO:0007154	cell communication	0.002937024	0.008408623	0	0	6	7555
GO:0030154 cell differentiation	5	0.002959099	83.333	0.001	Biological Process	GO:0030154	cell differentiation	0.002959099	0.008459492	0	0	5	4541
GO:0009887 animal organ morphogenesis	3	0.002997994	50	0.003	Biological Process	GO:0009887	animal organ morphogenesis	0.002997994	0.008497343	0	0	3	1107
GO:0010749 regulation of nitric oxide mediated signal transduction	1	0.003002625	16.667	0.1	Biological Process	GO:0010749	regulation of nitric oxide mediated signal transduction	0.003002625	0.008497343	0	0	1	10
GO:0032070 regulation of deoxyribonuclease activity	1	0.003002625	16.667	0.1	Biological Process	GO:0032070	regulation of deoxyribonuclease activity	0.003002625	0.008497343	0	0	1	10
GO:0045792 negative regulation of cell size	1	0.003002625	16.667	0.1	Biological Process	GO:0045792	negative regulation of cell size	0.003002625	0.008497343	0	0	1	10
GO:0046322 negative regulation of fatty acid oxidation	1	0.003002625	16.667	0.1	Biological Process	GO:0046322	negative regulation of fatty acid oxidation	0.003002625	0.008497343	0	0	1	10
GO:0070091 glucagon secretion	1	0.003002625	16.667	0.1	Biological Process	GO:0070091	glucagon secretion	0.003002625	0.008497343	0	0	1	10
GO:0097050 type B pancreatic cell apoptotic process	1	0.003002625	16.667	0.1	Biological Process	GO:0097050	type B pancreatic cell apoptotic process	0.003002625	0.008497343	0	0	1	10
GO:0044262 cellular carbohydrate metabolic process	2	0.003015627	33.333	0.007	Biological Process	GO:0044262	cellular carbohydrate metabolic process	0.003015627	0.008521857	0	0	2	289
GO:0032868 response to insulin	2	0.00303616	33.333	0.007	Biological Process	GO:0032868	response to insulin	0.00303616	0.008555264	0	0	2	290
GO:0043491 protein kinase B signaling	2	0.00303616	33.333	0.007	Biological Process	GO:0043491	protein kinase B signaling	0.00303616	0.008555264	0	0	2	290
GO:0038093 Fc receptor signaling pathway	2	0.003118963	33.333	0.007	Biological Process	GO:0038093	Fc receptor signaling pathway	0.003118963	0.008775995	0	0	2	294
GO:0050790 regulation of catalytic activity	4	0.003160121	66.667	0.002	Biological Process	GO:0050790	regulation of catalytic activity	0.003160121	0.008879081	0	0	4	2538
GO:0051348 negative regulation of transferase activity	2	0.003266438	33.333	0.007	Biological Process	GO:0051348	negative regulation of transferase activity	0.003266438	0.009122446	0	0	2	301
GO:0005996 monosaccharide metabolic process	2	0.003287772	33.333	0.007	Biological Process	GO:0005996	monosaccharide metabolic process	0.003287772	0.009122446	0	0	2	302
GO:0031334 positive regulation of protein complex assembly	2	0.003287772	33.333	0.007	Biological Process	GO:0031334	positive regulation of protein complex assembly	0.003287772	0.009122446	0	0	2	302
GO:0010918 positive regulation of mitochondrial membrane potential	1	0.003302474	16.667	0.091	Biological Process	GO:0010918	positive regulation of mitochondrial membrane potential	0.003302474	0.009122446	0	0	1	11
GO:0032463 negative regulation of protein homooligomerization	1	0.003302474	16.667	0.091	Biological Process	GO:0032463	negative regulation of protein homooligomerization	0.003302474	0.009122446	0	0	1	11
GO:0043129 surfactant homeostasis	1	0.003302474	16.667	0.091	Biological Process	GO:0043129	surfactant homeostasis	0.003302474	0.009122446	0	0	1	11
GO:0060947 cardiac vascular smooth muscle cell differentiation	1	0.003302474	16.667	0.091	Biological Process	GO:0060947	cardiac vascular smooth muscle cell differentiation	0.003302474	0.009122446	0	0	1	11
GO:0140052 cellular response to oxidised low-density lipoprotein particle stimulus	1	0.003302474	16.667	0.091	Biological Process	GO:0140052	cellular response to oxidised low-density lipoprotein particle stimulus	0.003302474	0.009122446	0	0	1	11
GO:0150065 regulation of deacetylase activity	1	0.003302474	16.667	0.091	Biological Process	GO:0150065	regulation of deacetylase activity	0.003302474	0.009122446	0	0	1	11
GO:1905941 positive regulation of gonad development	1	0.003302474	16.667	0.091	Biological Process	GO:1905941	positive regulation of gonad development	0.003302474	0.009122446	0	0	1	11
GO:2000392 regulation of lamellipodium morphogenesis	1	0.003302474	16.667	0.091	Biological Process	GO:2000392	regulation of lamellipodium morphogenesis	0.003302474	0.009122446	0	0	1	11
GO:2000551 regulation of T-helper 2 cell cytokine production	1	0.003302474	16.667	0.091	Biological Process	GO:2000551	regulation of T-helper 2 cell cytokine production	0.003302474	0.009122446	0	0	1	11
GO:0019902 phosphatase binding	2	0.001483001	33.333	0.01	Molecular Function	GO:0019902	phosphatase binding	0.001483001	0.009209979	0	0	2	204
GO:0016301 kinase activity	3	0.001548581	50	0.003	Molecular Function	GO:0016301	kinase activity	0.001548581	0.009209979	0	0	3	891
GO:0031647 regulation of protein stability	2	0.003373773	33.333	0.007	Biological Process	GO:0031647	regulation of protein stability	0.003373773	0.009306308	0	0	2	306
GO:0034330 cell junction organization	2	0.003417173	33.333	0.006	Biological Process	GO:0034330	cell junction organization	0.003417173	0.009399618	0	0	2	308
GO:0051146 striated muscle cell differentiation	2	0.003417173	33.333	0.006	Biological Process	GO:0051146	striated muscle cell differentiation	0.003417173	0.009399618	0	0	2	308
GO:0030100 regulation of endocytosis	2	0.003460838	33.333	0.006	Biological Process	GO:0030100	regulation of endocytosis	0.003460838	0.009506413	0	0	2	310
GO:0034654 nucleobase-containing compound biosynthetic process	5	0.003482665	83.333	0.001	Biological Process	GO:0034654	nucleobase-containing compound biosynthetic process	0.003482665	0.009553009	0	0	5	4699
GO:0031326 regulation of cellular biosynthetic process	5	0.003507418	83.333	0.001	Biological Process	GO:0031326	regulation of cellular biosynthetic process	0.003507418	0.009607489	0	0	5	4706
GO:0071705 nitrogen compound transport	4	0.003517018	66.667	0.002	Biological Process	GO:0071705	nitrogen compound transport	0.003517018	0.009620367	0	0	4	2611
GO:0016236 macroautophagy	2	0.003526832	33.333	0.006	Biological Process	GO:0016236	macroautophagy	0.003526832	0.009620414	0	0	2	313
GO:0097193 intrinsic apoptotic signaling pathway	2	0.003526832	33.333	0.006	Biological Process	GO:0097193	intrinsic apoptotic signaling pathway	0.003526832	0.009620414	0	0	2	313
GO:0032989 cellular component morphogenesis	3	0.003557239	50	0.003	Biological Process	GO:0032989	cellular component morphogenesis	0.003557239	0.009651861	0	0	3	1175
GO:0043412 macromolecule modification	5	0.003589713	83.333	0.001	Biological Process	GO:0043412	macromolecule modification	0.003589713	0.009651861	0	0	5	4729
GO:0050778 positive regulation of immune response	3	0.003600772	50	0.003	Biological Process	GO:0050778	positive regulation of immune response	0.003600772	0.009651861	0	0	3	1180
GO:0010763 positive regulation of fibroblast migration	1	0.003602248	16.667	0.083	Biological Process	GO:0010763	positive regulation of fibroblast migration	0.003602248	0.009651861	0	0	1	12
GO:0032075 positive regulation of nuclease activity	1	0.003602248	16.667	0.083	Biological Process	GO:0032075	positive regulation of nuclease activity	0.003602248	0.009651861	0	0	1	12
GO:0032494 response to peptidoglycan	1	0.003602248	16.667	0.083	Biological Process	GO:0032494	response to peptidoglycan	0.003602248	0.009651861	0	0	1	12
GO:0051974 negative regulation of telomerase activity	1	0.003602248	16.667	0.083	Biological Process	GO:0051974	negative regulation of telomerase activity	0.003602248	0.009651861	0	0	1	12
GO:0060439 trachea morphogenesis	1	0.003602248	16.667	0.083	Biological Process	GO:0060439	trachea morphogenesis	0.003602248	0.009651861	0	0	1	12
GO:0061307 cardiac neural crest cell differentiation involved in heart development	1	0.003602248	16.667	0.083	Biological Process	GO:0061307	cardiac neural crest cell differentiation involved in heart development	0.003602248	0.009651861	0	0	1	12
GO:0061308 cardiac neural crest cell development involved in heart development	1	0.003602248	16.667	0.083	Biological Process	GO:0061308	cardiac neural crest cell development involved in heart development	0.003602248	0.009651861	0	0	1	12
GO:0070673 response to interleukin-18	1	0.003602248	16.667	0.083	Biological Process	GO:0070673	response to interleukin-18	0.003602248	0.009651861	0	0	1	12
GO:0071679 commissural neuron axon guidance	1	0.003602248	16.667	0.083	Biological Process	GO:0071679	commissural neuron axon guidance	0.003602248	0.009651861	0	0	1	12
GO:0072540 T-helper 17 cell lineage commitment	1	0.003602248	16.667	0.083	Biological Process	GO:0072540	T-helper 17 cell lineage commitment	0.003602248	0.009651861	0	0	1	12
GO:0048869 cellular developmental process	5	0.003702993	83.333	0.001	Biological Process	GO:0048869	cellular developmental process	0.003702993	0.009902109	0	0	5	4760
GO:0050714 positive regulation of protein secretion	2	0.003705728	33.333	0.006	Biological Process	GO:0050714	positive regulation of protein secretion	0.003705728	0.009902109	0	0	2	321
GO:0018130 heterocycle biosynthetic process	5	0.00374012	83.333	0.001	Biological Process	GO:0018130	heterocycle biosynthetic process	0.00374012	0.00998043	0	0	5	4770
GO:0019438 aromatic compound biosynthetic process	5	0.003773781	83.333	0.001	Biological Process	GO:0019438	aromatic compound biosynthetic process	0.003773781	0.010056589	0	0	5	4779
GO:0051172 negative regulation of nitrogen compound metabolic process	4	0.003793603	66.667	0.002	Biological Process	GO:0051172	negative regulation of nitrogen compound metabolic process	0.003793603	0.010095713	0	0	4	2664
GO:0009889 regulation of biosynthetic process	5	0.003800124	83.333	0.001	Biological Process	GO:0009889	regulation of biosynthetic process	0.003800124	0.010099382	0	0	5	4786
GO:0007162 negative regulation of cell adhesion	2	0.003842673	33.333	0.006	Biological Process	GO:0007162	negative regulation of cell adhesion	0.003842673	0.010198661	0	0	2	327
GO:0002551 mast cell chemotaxis	1	0.003901946	16.667	0.077	Biological Process	GO:0002551	mast cell chemotaxis	0.003901946	0.010258932	0	0	1	13
GO:0033623 regulation of integrin activation	1	0.003901946	16.667	0.077	Biological Process	GO:0033623	regulation of integrin activation	0.003901946	0.010258932	0	0	1	13
GO:0045779 negative regulation of bone resorption	1	0.003901946	16.667	0.077	Biological Process	GO:0045779	negative regulation of bone resorption	0.003901946	0.010258932	0	0	1	13
GO:0048875 chemical homeostasis within a tissue	1	0.003901946	16.667	0.077	Biological Process	GO:0048875	chemical homeostasis within a tissue	0.003901946	0.010258932	0	0	1	13
GO:0098962 regulation of postsynaptic neurotransmitter receptor activity	1	0.003901946	16.667	0.077	Biological Process	GO:0098962	regulation of postsynaptic neurotransmitter receptor activity	0.003901946	0.010258932	0	0	1	13
GO:1903960 negative regulation of anion transmembrane transport	1	0.003901946	16.667	0.077	Biological Process	GO:1903960	negative regulation of anion transmembrane transport	0.003901946	0.010258932	0	0	1	13
GO:2000194 regulation of female gonad development	1	0.003901946	16.667	0.077	Biological Process	GO:2000194	regulation of female gonad development	0.003901946	0.010258932	0	0	1	13
GO:0032269 negative regulation of cellular protein metabolic process	3	0.003951935	50	0.002	Biological Process	GO:0032269	negative regulation of cellular protein metabolic process	0.003951935	0.010376471	0	0	3	1219
GO:0071375 cellular response to peptide hormone stimulus	2	0.00405253	33.333	0.006	Biological Process	GO:0071375	cellular response to peptide hormone stimulus	0.00405253	0.010626394	0	0	2	336
GO:0035745 T-helper 2 cell cytokine production	1	0.00420157	16.667	0.071	Biological Process	GO:0035745	T-helper 2 cell cytokine production	0.00420157	0.010872046	0	0	1	14
GO:0035791 platelet-derived growth factor receptor-beta signaling pathway	1	0.00420157	16.667	0.071	Biological Process	GO:0035791	platelet-derived growth factor receptor-beta signaling pathway	0.00420157	0.010872046	0	0	1	14
GO:0038166 angiotensin-activated signaling pathway	1	0.00420157	16.667	0.071	Biological Process	GO:0038166	angiotensin-activated signaling pathway	0.00420157	0.010872046	0	0	1	14
GO:0043217 myelin maintenance	1	0.00420157	16.667	0.071	Biological Process	GO:0043217	myelin maintenance	0.00420157	0.010872046	0	0	1	14
GO:0048308 organelle inheritance	1	0.00420157	16.667	0.071	Biological Process	GO:0048308	organelle inheritance	0.00420157	0.010872046	0	0	1	14
GO:0048313 Golgi inheritance	1	0.00420157	16.667	0.071	Biological Process	GO:0048313	Golgi inheritance	0.00420157	0.010872046	0	0	1	14
GO:0051024 positive regulation of immunoglobulin secretion	1	0.00420157	16.667	0.071	Biological Process	GO:0051024	positive regulation of immunoglobulin secretion	0.00420157	0.010872046	0	0	1	14
GO:0060712 spongiotrophoblast layer development	1	0.00420157	16.667	0.071	Biological Process	GO:0060712	spongiotrophoblast layer development	0.00420157	0.010872046	0	0	1	14
GO:0097531 mast cell migration	1	0.00420157	16.667	0.071	Biological Process	GO:0097531	mast cell migration	0.00420157	0.010872046	0	0	1	14
GO:1903351 cellular response to dopamine	1	0.00420157	16.667	0.071	Biological Process	GO:1903351	cellular response to dopamine	0.00420157	0.010872046	0	0	1	14
GO:0002793 positive regulation of peptide secretion	2	0.004219426	33.333	0.006	Biological Process	GO:0002793	positive regulation of peptide secretion	0.004219426	0.010903884	0	0	2	343
GO:0060562 epithelial tube morphogenesis	2	0.004267699	33.333	0.006	Biological Process	GO:0060562	epithelial tube morphogenesis	0.004267699	0.010999685	0	0	2	345
GO:0071496 cellular response to external stimulus	2	0.004267699	33.333	0.006	Biological Process	GO:0071496	cellular response to external stimulus	0.004267699	0.010999685	0	0	2	345
GO:0046677 response to antibiotic	2	0.004340598	33.333	0.006	Biological Process	GO:0046677	response to antibiotic	0.004340598	0.011172916	0	0	2	348
GO:0005138 interleukin-6 receptor binding	1	0.002078178	16.667	0.143	Molecular Function	GO:0005138	interleukin-6 receptor binding	0.002078178	0.011182579	0	0	1	7
GO:0071253 connexin binding	1	0.002078178	16.667	0.143	Molecular Function	GO:0071253	connexin binding	0.002078178	0.011182579	0	0	1	7
GO:0045944 positive regulation of transcription by RNA polymerase II	3	0.00435349	50	0.002	Biological Process	GO:0045944	positive regulation of transcription by RNA polymerase II	0.00435349	0.011191432	0	0	3	1261
GO:0044092 negative regulation of molecular function	3	0.004383115	50	0.002	Biological Process	GO:0044092	negative regulation of molecular function	0.004383115	0.011252859	0	0	3	1264
GO:1901362 organic cyclic compound biosynthetic process	5	0.004391273	83.333	0.001	Biological Process	GO:1901362	organic cyclic compound biosynthetic process	0.004391273	0.011259087	0	0	5	4934
GO:0070371 ERK1 and ERK2 cascade	2	0.004488158	33.333	0.006	Biological Process	GO:0070371	ERK1 and ERK2 cascade	0.004488158	0.011451031	0	0	2	354
GO:0060841 venous blood vessel development	1	0.004501118	16.667	0.067	Biological Process	GO:0060841	venous blood vessel development	0.004501118	0.011451031	0	0	1	15
GO:1903350 response to dopamine	1	0.004501118	16.667	0.067	Biological Process	GO:1903350	response to dopamine	0.004501118	0.011451031	0	0	1	15
GO:1903358 regulation of Golgi organization	1	0.004501118	16.667	0.067	Biological Process	GO:1903358	regulation of Golgi organization	0.004501118	0.011451031	0	0	1	15
GO:2000402 negative regulation of lymphocyte migration	1	0.004501118	16.667	0.067	Biological Process	GO:2000402	negative regulation of lymphocyte migration	0.004501118	0.011451031	0	0	1	15
GO:2001028 positive regulation of endothelial cell chemotaxis	1	0.004501118	16.667	0.067	Biological Process	GO:2001028	positive regulation of endothelial cell chemotaxis	0.004501118	0.011451031	0	0	1	15
GO:0051235 maintenance of location	2	0.004537865	33.333	0.006	Biological Process	GO:0051235	maintenance of location	0.004537865	0.011529583	0	0	2	356
GO:0043603 cellular amide metabolic process	3	0.004594049	50	0.002	Biological Process	GO:0043603	cellular amide metabolic process	0.004594049	0.011657251	0	0	3	1285
GO:0009615 response to virus	2	0.004663271	33.333	0.006	Biological Process	GO:0009615	response to virus	0.004663271	0.011817631	0	0	2	361
GO:0051276 chromosome organization	3	0.004686368	50	0.002	Biological Process	GO:0051276	chromosome organization	0.004686368	0.011860859	0	0	3	1294
GO:0031324 negative regulation of cellular metabolic process	4	0.004747998	66.667	0.001	Biological Process	GO:0031324	negative regulation of cellular metabolic process	0.004747998	0.012001375	0	0	4	2828
GO:0007568 aging	2	0.004764763	33.333	0.005	Biological Process	GO:0007568	aging	0.004764763	0.012010651	0	0	2	365
GO:0031589 cell-substrate adhesion	2	0.004764763	33.333	0.005	Biological Process	GO:0031589	cell-substrate adhesion	0.004764763	0.012010651	0	0	2	365
GO:0002295 T-helper cell lineage commitment	1	0.004800591	16.667	0.062	Biological Process	GO:0002295	T-helper cell lineage commitment	0.004800591	0.012010651	0	0	1	16
GO:0002830 positive regulation of type 2 immune response	1	0.004800591	16.667	0.062	Biological Process	GO:0002830	positive regulation of type 2 immune response	0.004800591	0.012010651	0	0	1	16
GO:0045838 positive regulation of membrane potential	1	0.004800591	16.667	0.062	Biological Process	GO:0045838	positive regulation of membrane potential	0.004800591	0.012010651	0	0	1	16
GO:0046851 negative regulation of bone remodeling	1	0.004800591	16.667	0.062	Biological Process	GO:0046851	negative regulation of bone remodeling	0.004800591	0.012010651	0	0	1	16
GO:0048569 post-embryonic animal organ development	1	0.004800591	16.667	0.062	Biological Process	GO:0048569	post-embryonic animal organ development	0.004800591	0.012010651	0	0	1	16
GO:0090036 regulation of protein kinase C signaling	1	0.004800591	16.667	0.062	Biological Process	GO:0090036	regulation of protein kinase C signaling	0.004800591	0.012010651	0	0	1	16
GO:0030235 nitric-oxide synthase regulator activity	1	0.002374767	16.667	0.125	Molecular Function	GO:0030235	nitric-oxide synthase regulator activity	0.002374767	0.012074195	0	0	1	8
GO:0016772 transferase activity, transferring phosphorus-containing groups	3	0.002551701	50	0.003	Molecular Function	GO:0016772	transferase activity, transferring phosphorus-containing groups	0.002551701	0.012074195	0	0	3	1059
GO:0097367 carbohydrate derivative binding	4	0.002641421	66.667	0.002	Molecular Function	GO:0097367	carbohydrate derivative binding	0.002641421	0.012074195	0	0	4	2449
GO:0043184 vascular endothelial growth factor receptor 2 binding	1	0.002671282	16.667	0.111	Molecular Function	GO:0043184	vascular endothelial growth factor receptor 2 binding	0.002671282	0.012074195	0	0	1	9
GO:0022412 cellular process involved in reproduction in multicellular organism	2	0.004841562	33.333	0.005	Biological Process	GO:0022412	cellular process involved in reproduction in multicellular organism	0.004841562	0.012097746	0	0	2	368
GO:0006913 nucleocytoplasmic transport	2	0.005023023	33.333	0.005	Biological Process	GO:0006913	nucleocytoplasmic transport	0.005023023	0.012524821	0	0	2	375
GO:0006206 pyrimidine nucleobase metabolic process	1	0.005099989	16.667	0.059	Biological Process	GO:0006206	pyrimidine nucleobase metabolic process	0.005099989	0.012524821	0	0	1	17
GO:0032966 negative regulation of collagen biosynthetic process	1	0.005099989	16.667	0.059	Biological Process	GO:0032966	negative regulation of collagen biosynthetic process	0.005099989	0.012524821	0	0	1	17
GO:0043373 CD4-positive, alpha-beta T cell lineage commitment	1	0.005099989	16.667	0.059	Biological Process	GO:0043373	CD4-positive, alpha-beta T cell lineage commitment	0.005099989	0.012524821	0	0	1	17
GO:0045091 regulation of single stranded viral RNA replication via double stranded DNA intermediate	1	0.005099989	16.667	0.059	Biological Process	GO:0045091	regulation of single stranded viral RNA replication via double stranded DNA intermediate	0.005099989	0.012524821	0	0	1	17
GO:0045725 positive regulation of glycogen biosynthetic process	1	0.005099989	16.667	0.059	Biological Process	GO:0045725	positive regulation of glycogen biosynthetic process	0.005099989	0.012524821	0	0	1	17
GO:0060644 mammary gland epithelial cell differentiation	1	0.005099989	16.667	0.059	Biological Process	GO:0060644	mammary gland epithelial cell differentiation	0.005099989	0.012524821	0	0	1	17
GO:0071380 cellular response to prostaglandin E stimulus	1	0.005099989	16.667	0.059	Biological Process	GO:0071380	cellular response to prostaglandin E stimulus	0.005099989	0.012524821	0	0	1	17
GO:0071803 positive regulation of podosome assembly	1	0.005099989	16.667	0.059	Biological Process	GO:0071803	positive regulation of podosome assembly	0.005099989	0.012524821	0	0	1	17
GO:0072673 lamellipodium morphogenesis	1	0.005099989	16.667	0.059	Biological Process	GO:0072673	lamellipodium morphogenesis	0.005099989	0.012524821	0	0	1	17
GO:0086103 G protein-coupled receptor signaling pathway involved in heart process	1	0.005099989	16.667	0.059	Biological Process	GO:0086103	G protein-coupled receptor signaling pathway involved in heart process	0.005099989	0.012524821	0	0	1	17
GO:1902001 fatty acid transmembrane transport	1	0.005099989	16.667	0.059	Biological Process	GO:1902001	fatty acid transmembrane transport	0.005099989	0.012524821	0	0	1	17
GO:2000811 negative regulation of anoikis	1	0.005099989	16.667	0.059	Biological Process	GO:2000811	negative regulation of anoikis	0.005099989	0.012524821	0	0	1	17
GO:0051169 nuclear transport	2	0.00510176	33.333	0.005	Biological Process	GO:0051169	nuclear transport	0.00510176	0.012524821	0	0	2	378
GO:0051726 regulation of cell cycle	3	0.005176432	50	0.002	Biological Process	GO:0051726	regulation of cell cycle	0.005176432	0.012692274	0	0	3	1340
GO:0050678 regulation of epithelial cell proliferation	2	0.005314556	33.333	0.005	Biological Process	GO:0050678	regulation of epithelial cell proliferation	0.005314556	0.013014698	0	0	2	386
GO:0010038 response to metal ion	2	0.005368397	33.333	0.005	Biological Process	GO:0010038	response to metal ion	0.005368397	0.013075523	0	0	2	388
GO:0001780 neutrophil homeostasis	1	0.005399312	16.667	0.056	Biological Process	GO:0001780	neutrophil homeostasis	0.005399312	0.013075523	0	0	1	18
GO:0010713 negative regulation of collagen metabolic process	1	0.005399312	16.667	0.056	Biological Process	GO:0010713	negative regulation of collagen metabolic process	0.005399312	0.013075523	0	0	1	18
GO:0031065 positive regulation of histone deacetylation	1	0.005399312	16.667	0.056	Biological Process	GO:0031065	positive regulation of histone deacetylation	0.005399312	0.013075523	0	0	1	18
GO:0031998 regulation of fatty acid beta-oxidation	1	0.005399312	16.667	0.056	Biological Process	GO:0031998	regulation of fatty acid beta-oxidation	0.005399312	0.013075523	0	0	1	18
GO:0060977 coronary vasculature morphogenesis	1	0.005399312	16.667	0.056	Biological Process	GO:0060977	coronary vasculature morphogenesis	0.005399312	0.013075523	0	0	1	18
GO:0061888 regulation of astrocyte activation	1	0.005399312	16.667	0.056	Biological Process	GO:0061888	regulation of astrocyte activation	0.005399312	0.013075523	0	0	1	18
GO:0070875 positive regulation of glycogen metabolic process	1	0.005399312	16.667	0.056	Biological Process	GO:0070875	positive regulation of glycogen metabolic process	0.005399312	0.013075523	0	0	1	18
GO:1904355 positive regulation of telomere capping	1	0.005399312	16.667	0.056	Biological Process	GO:1904355	positive regulation of telomere capping	0.005399312	0.013075523	0	0	1	18
GO:0032535 regulation of cellular component size	2	0.00544964	33.333	0.005	Biological Process	GO:0032535	regulation of cellular component size	0.00544964	0.013164937	0	0	2	391
GO:0051098 regulation of binding	2	0.00544964	33.333	0.005	Biological Process	GO:0051098	regulation of binding	0.00544964	0.013164937	0	0	2	391
GO:0016070 RNA metabolic process	5	0.00550865	83.333	0.001	Biological Process	GO:0016070	RNA metabolic process	0.00550865	0.013291141	0	0	5	5176
GO:0032501 multicellular organismal process	6	0.005621377	100	0.001	Biological Process	GO:0032501	multicellular organismal process	0.005621377	0.01353322	0	0	6	8418
GO:0031346 positive regulation of cell projection organization	2	0.005669104	33.333	0.005	Biological Process	GO:0031346	positive regulation of cell projection organization	0.005669104	0.01353322	0	0	2	399
GO:0002363 alpha-beta T cell lineage commitment	1	0.00569856	16.667	0.053	Biological Process	GO:0002363	alpha-beta T cell lineage commitment	0.00569856	0.01353322	0	0	1	19
GO:0007252 I-kappaB phosphorylation	1	0.00569856	16.667	0.053	Biological Process	GO:0007252	I-kappaB phosphorylation	0.00569856	0.01353322	0	0	1	19
GO:0030949 positive regulation of vascular endothelial growth factor receptor signaling pathway	1	0.00569856	16.667	0.053	Biological Process	GO:0030949	positive regulation of vascular endothelial growth factor receptor signaling pathway	0.00569856	0.01353322	0	0	1	19
GO:0032460 negative regulation of protein oligomerization	1	0.00569856	16.667	0.053	Biological Process	GO:0032460	negative regulation of protein oligomerization	0.00569856	0.01353322	0	0	1	19
GO:0032793 positive regulation of CREB transcription factor activity	1	0.00569856	16.667	0.053	Biological Process	GO:0032793	positive regulation of CREB transcription factor activity	0.00569856	0.01353322	0	0	1	19
GO:0036035 osteoclast development	1	0.00569856	16.667	0.053	Biological Process	GO:0036035	osteoclast development	0.00569856	0.01353322	0	0	1	19
GO:0036303 lymph vessel morphogenesis	1	0.00569856	16.667	0.053	Biological Process	GO:0036303	lymph vessel morphogenesis	0.00569856	0.01353322	0	0	1	19
GO:0039692 single stranded viral RNA replication via double stranded DNA intermediate	1	0.00569856	16.667	0.053	Biological Process	GO:0039692	single stranded viral RNA replication via double stranded DNA intermediate	0.00569856	0.01353322	0	0	1	19
GO:0090201 negative regulation of release of cytochrome c from mitochondria	1	0.00569856	16.667	0.053	Biological Process	GO:0090201	negative regulation of release of cytochrome c from mitochondria	0.00569856	0.01353322	0	0	1	19
GO:1902176 negative regulation of oxidative stress-induced intrinsic apoptotic signaling pathway	1	0.00569856	16.667	0.053	Biological Process	GO:1902176	negative regulation of oxidative stress-induced intrinsic apoptotic signaling pathway	0.00569856	0.01353322	0	0	1	19
GO:1905939 regulation of gonad development	1	0.00569856	16.667	0.053	Biological Process	GO:1905939	regulation of gonad development	0.00569856	0.01353322	0	0	1	19
GO:0006955 immune response	4	0.005760561	66.667	0.001	Biological Process	GO:0006955	immune response	0.005760561	0.013663939	0	0	4	2978
GO:0042692 muscle cell differentiation	2	0.005780368	33.333	0.005	Biological Process	GO:0042692	muscle cell differentiation	0.005780368	0.013694382	0	0	2	403
GO:0045862 positive regulation of proteolysis	2	0.005836382	33.333	0.005	Biological Process	GO:0045862	positive regulation of proteolysis	0.005836382	0.013809862	0	0	2	405
GO:0010468 regulation of gene expression	5	0.005843175	83.333	0.001	Biological Process	GO:0010468	regulation of gene expression	0.005843175	0.013809862	0	0	5	5241
GO:1901653 cellular response to peptide	2	0.005892652	33.333	0.005	Biological Process	GO:1901653	cellular response to peptide	0.005892652	0.013910057	0	0	2	407
GO:0008104 protein localization	4	0.005980078	66.667	0.001	Biological Process	GO:0008104	protein localization	0.005980078	0.014025792	0	0	4	3008
GO:0048739 cardiac muscle fiber development	1	0.005997733	16.667	0.05	Biological Process	GO:0048739	cardiac muscle fiber development	0.005997733	0.014025792	0	0	1	20
GO:0051895 negative regulation of focal adhesion assembly	1	0.005997733	16.667	0.05	Biological Process	GO:0051895	negative regulation of focal adhesion assembly	0.005997733	0.014025792	0	0	1	20
GO:0060438 trachea development	1	0.005997733	16.667	0.05	Biological Process	GO:0060438	trachea development	0.005997733	0.014025792	0	0	1	20
GO:0060749 mammary gland alveolus development	1	0.005997733	16.667	0.05	Biological Process	GO:0060749	mammary gland alveolus development	0.005997733	0.014025792	0	0	1	20
GO:0061377 mammary gland lobule development	1	0.005997733	16.667	0.05	Biological Process	GO:0061377	mammary gland lobule development	0.005997733	0.014025792	0	0	1	20
GO:0090190 positive regulation of branching involved in ureteric bud morphogenesis	1	0.005997733	16.667	0.05	Biological Process	GO:0090190	positive regulation of branching involved in ureteric bud morphogenesis	0.005997733	0.014025792	0	0	1	20
GO:0006898 receptor-mediated endocytosis	2	0.006005953	33.333	0.005	Biological Process	GO:0006898	receptor-mediated endocytosis	0.006005953	0.014025792	0	0	2	411
GO:0014706 striated muscle tissue development	2	0.006005953	33.333	0.005	Biological Process	GO:0014706	striated muscle tissue development	0.006005953	0.014025792	0	0	2	411
GO:0010639 negative regulation of organelle organization	2	0.006062984	33.333	0.005	Biological Process	GO:0010639	negative regulation of organelle organization	0.006062984	0.014142163	0	0	2	413
GO:0045236 CXCR chemokine receptor binding	1	0.003264092	16.667	0.091	Molecular Function	GO:0045236	CXCR chemokine receptor binding	0.003264092	0.014186247	0	0	1	11
GO:0019216 regulation of lipid metabolic process	2	0.006091595	33.333	0.005	Biological Process	GO:0019216	regulation of lipid metabolic process	0.006091595	0.014192044	0	0	2	414
GO:0051336 regulation of hydrolase activity	3	0.006151756	50	0.002	Biological Process	GO:0051336	regulation of hydrolase activity	0.006151756	0.014315224	0	0	3	1424
GO:0048545 response to steroid hormone	2	0.006235601	33.333	0.005	Biological Process	GO:0048545	response to steroid hormone	0.006235601	0.014330216	0	0	2	419
GO:0071702 organic substance transport	4	0.006281916	66.667	0.001	Biological Process	GO:0071702	organic substance transport	0.006281916	0.014330216	0	0	4	3048
GO:0002726 positive regulation of T cell cytokine production	1	0.006296831	16.667	0.048	Biological Process	GO:0002726	positive regulation of T cell cytokine production	0.006296831	0.014330216	0	0	1	21
GO:0010715 regulation of extracellular matrix disassembly	1	0.006296831	16.667	0.048	Biological Process	GO:0010715	regulation of extracellular matrix disassembly	0.006296831	0.014330216	0	0	1	21
GO:0031290 retinal ganglion cell axon guidance	1	0.006296831	16.667	0.048	Biological Process	GO:0031290	retinal ganglion cell axon guidance	0.006296831	0.014330216	0	0	1	21
GO:0032211 negative regulation of telomere maintenance via telomerase	1	0.006296831	16.667	0.048	Biological Process	GO:0032211	negative regulation of telomere maintenance via telomerase	0.006296831	0.014330216	0	0	1	21
GO:0032891 negative regulation of organic acid transport	1	0.006296831	16.667	0.048	Biological Process	GO:0032891	negative regulation of organic acid transport	0.006296831	0.014330216	0	0	1	21
GO:0034104 negative regulation of tissue remodeling	1	0.006296831	16.667	0.048	Biological Process	GO:0034104	negative regulation of tissue remodeling	0.006296831	0.014330216	0	0	1	21
GO:0035162 embryonic hemopoiesis	1	0.006296831	16.667	0.048	Biological Process	GO:0035162	embryonic hemopoiesis	0.006296831	0.014330216	0	0	1	21
GO:0036120 cellular response to platelet-derived growth factor stimulus	1	0.006296831	16.667	0.048	Biological Process	GO:0036120	cellular response to platelet-derived growth factor stimulus	0.006296831	0.014330216	0	0	1	21
GO:0036499 PERK-mediated unfolded protein response	1	0.006296831	16.667	0.048	Biological Process	GO:0036499	PERK-mediated unfolded protein response	0.006296831	0.014330216	0	0	1	21
GO:0043369 CD4-positive or CD8-positive, alpha-beta T cell lineage commitment	1	0.006296831	16.667	0.048	Biological Process	GO:0043369	CD4-positive or CD8-positive, alpha-beta T cell lineage commitment	0.006296831	0.014330216	0	0	1	21
GO:0046628 positive regulation of insulin receptor signaling pathway	1	0.006296831	16.667	0.048	Biological Process	GO:0046628	positive regulation of insulin receptor signaling pathway	0.006296831	0.014330216	0	0	1	21
GO:0051023 regulation of immunoglobulin secretion	1	0.006296831	16.667	0.048	Biological Process	GO:0051023	regulation of immunoglobulin secretion	0.006296831	0.014330216	0	0	1	21
GO:0051900 regulation of mitochondrial depolarization	1	0.006296831	16.667	0.048	Biological Process	GO:0051900	regulation of mitochondrial depolarization	0.006296831	0.014330216	0	0	1	21
GO:0071498 cellular response to fluid shear stress	1	0.006296831	16.667	0.048	Biological Process	GO:0071498	cellular response to fluid shear stress	0.006296831	0.014330216	0	0	1	21
GO:0071801 regulation of podosome assembly	1	0.006296831	16.667	0.048	Biological Process	GO:0071801	regulation of podosome assembly	0.006296831	0.014330216	0	0	1	21
GO:1903055 positive regulation of extracellular matrix organization	1	0.006296831	16.667	0.048	Biological Process	GO:1903055	positive regulation of extracellular matrix organization	0.006296831	0.014330216	0	0	1	21
GO:1903392 negative regulation of adherens junction organization	1	0.006296831	16.667	0.048	Biological Process	GO:1903392	negative regulation of adherens junction organization	0.006296831	0.014330216	0	0	1	21
GO:0051716 cellular response to stimulus	6	0.006351365	100	0.001	Biological Process	GO:0051716	cellular response to stimulus	0.006351365	0.014437593	0	0	6	8591
GO:0060537 muscle tissue development	2	0.006469298	33.333	0.005	Biological Process	GO:0060537	muscle tissue development	0.006469298	0.014688672	0	0	2	427
GO:0010876 lipid localization	2	0.006557976	33.333	0.005	Biological Process	GO:0010876	lipid localization	0.006557976	0.0148558	0	0	2	430
GO:0002052 positive regulation of neuroblast proliferation	1	0.006595854	16.667	0.045	Biological Process	GO:0002052	positive regulation of neuroblast proliferation	0.006595854	0.0148558	0	0	1	22
GO:0010447 response to acidic pH	1	0.006595854	16.667	0.045	Biological Process	GO:0010447	response to acidic pH	0.006595854	0.0148558	0	0	1	22
GO:0033622 integrin activation	1	0.006595854	16.667	0.045	Biological Process	GO:0033622	integrin activation	0.006595854	0.0148558	0	0	1	22
GO:0035743 CD4-positive, alpha-beta T cell cytokine production	1	0.006595854	16.667	0.045	Biological Process	GO:0035743	CD4-positive, alpha-beta T cell cytokine production	0.006595854	0.0148558	0	0	1	22
GO:0036119 response to platelet-derived growth factor	1	0.006595854	16.667	0.045	Biological Process	GO:0036119	response to platelet-derived growth factor	0.006595854	0.0148558	0	0	1	22
GO:0090312 positive regulation of protein deacetylation	1	0.006595854	16.667	0.045	Biological Process	GO:0090312	positive regulation of protein deacetylation	0.006595854	0.0148558	0	0	1	22
GO:0032386 regulation of intracellular transport	2	0.00664722	33.333	0.005	Biological Process	GO:0032386	regulation of intracellular transport	0.00664722	0.014954341	0	0	2	433
GO:0045787 positive regulation of cell cycle	2	0.006677094	33.333	0.005	Biological Process	GO:0045787	positive regulation of cell cycle	0.006677094	0.015004362	0	0	2	434
GO:0001558 regulation of cell growth	2	0.006797218	33.333	0.005	Biological Process	GO:0001558	regulation of cell growth	0.006797218	0.015256841	0	0	2	438
GO:0006925 inflammatory cell apoptotic process	1	0.006894802	16.667	0.043	Biological Process	GO:0006925	inflammatory cell apoptotic process	0.006894802	0.015318316	0	0	1	23
GO:0032462 regulation of protein homooligomerization	1	0.006894802	16.667	0.043	Biological Process	GO:0032462	regulation of protein homooligomerization	0.006894802	0.015318316	0	0	1	23
GO:0061213 positive regulation of mesonephros development	1	0.006894802	16.667	0.043	Biological Process	GO:0061213	positive regulation of mesonephros development	0.006894802	0.015318316	0	0	1	23
GO:0071379 cellular response to prostaglandin stimulus	1	0.006894802	16.667	0.043	Biological Process	GO:0071379	cellular response to prostaglandin stimulus	0.006894802	0.015318316	0	0	1	23
GO:0090023 positive regulation of neutrophil chemotaxis	1	0.006894802	16.667	0.043	Biological Process	GO:0090023	positive regulation of neutrophil chemotaxis	0.006894802	0.015318316	0	0	1	23
GO:1900078 positive regulation of cellular response to insulin stimulus	1	0.006894802	16.667	0.043	Biological Process	GO:1900078	positive regulation of cellular response to insulin stimulus	0.006894802	0.015318316	0	0	1	23
GO:1901522 positive regulation of transcription from RNA polymerase II promoter involved in cellular response to chemical stimulus	1	0.006894802	16.667	0.043	Biological Process	GO:1901522	positive regulation of transcription from RNA polymerase II promoter involved in cellular response to chemical stimulus	0.006894802	0.015318316	0	0	1	23
GO:1903589 positive regulation of blood vessel endothelial cell proliferation involved in sprouting angiogenesis	1	0.006894802	16.667	0.043	Biological Process	GO:1903589	positive regulation of blood vessel endothelial cell proliferation involved in sprouting angiogenesis	0.006894802	0.015318316	0	0	1	23
GO:2000010 positive regulation of protein localization to cell surface	1	0.006894802	16.667	0.043	Biological Process	GO:2000010	positive regulation of protein localization to cell surface	0.006894802	0.015318316	0	0	1	23
GO:2001233 regulation of apoptotic signaling pathway	2	0.006918346	33.333	0.005	Biological Process	GO:2001233	regulation of apoptotic signaling pathway	0.006918346	0.015353255	0	0	2	442
GO:0034645 cellular macromolecule biosynthetic process	5	0.006989753	83.333	0.001	Biological Process	GO:0034645	cellular macromolecule biosynthetic process	0.006989753	0.015494215	0	0	5	5444
GO:0032682 negative regulation of chemokine production	1	0.007193675	16.667	0.042	Biological Process	GO:0032682	negative regulation of chemokine production	0.007193675	0.015838989	0	0	1	24
GO:0051882 mitochondrial depolarization	1	0.007193675	16.667	0.042	Biological Process	GO:0051882	mitochondrial depolarization	0.007193675	0.015838989	0	0	1	24
GO:0060065 uterus development	1	0.007193675	16.667	0.042	Biological Process	GO:0060065	uterus development	0.007193675	0.015838989	0	0	1	24
GO:0090189 regulation of branching involved in ureteric bud morphogenesis	1	0.007193675	16.667	0.042	Biological Process	GO:0090189	regulation of branching involved in ureteric bud morphogenesis	0.007193675	0.015838989	0	0	1	24
GO:2000209 regulation of anoikis	1	0.007193675	16.667	0.042	Biological Process	GO:2000209	regulation of anoikis	0.007193675	0.015838989	0	0	1	24
GO:2001026 regulation of endothelial cell chemotaxis	1	0.007193675	16.667	0.042	Biological Process	GO:2001026	regulation of endothelial cell chemotaxis	0.007193675	0.015838989	0	0	1	24
GO:0043434 response to peptide hormone	2	0.007287736	33.333	0.004	Biological Process	GO:0043434	response to peptide hormone	0.007287736	0.016028123	0	0	2	454
GO:0050776 regulation of immune response	3	0.007343349	50	0.002	Biological Process	GO:0050776	regulation of immune response	0.007343349	0.016132367	0	0	3	1516
GO:0010256 endomembrane system organization	2	0.007412862	33.333	0.004	Biological Process	GO:0010256	endomembrane system organization	0.007412862	0.016241962	0	0	2	458
GO:1903532 positive regulation of secretion by cell	2	0.007412862	33.333	0.004	Biological Process	GO:1903532	positive regulation of secretion by cell	0.007412862	0.016241962	0	0	2	458
GO:0042391 regulation of membrane potential	2	0.007475799	33.333	0.004	Biological Process	GO:0042391	regulation of membrane potential	0.007475799	0.016241962	0	0	2	460
GO:0001945 lymph vessel development	1	0.007492473	16.667	0.04	Biological Process	GO:0001945	lymph vessel development	0.007492473	0.016241962	0	0	1	25
GO:0010640 regulation of platelet-derived growth factor receptor signaling pathway	1	0.007492473	16.667	0.04	Biological Process	GO:0010640	regulation of platelet-derived growth factor receptor signaling pathway	0.007492473	0.016241962	0	0	1	25
GO:0010888 negative regulation of lipid storage	1	0.007492473	16.667	0.04	Biological Process	GO:0010888	negative regulation of lipid storage	0.007492473	0.016241962	0	0	1	25
GO:0034695 response to prostaglandin E	1	0.007492473	16.667	0.04	Biological Process	GO:0034695	response to prostaglandin E	0.007492473	0.016241962	0	0	1	25
GO:0045056 transcytosis	1	0.007492473	16.667	0.04	Biological Process	GO:0045056	transcytosis	0.007492473	0.016241962	0	0	1	25
GO:0048305 immunoglobulin secretion	1	0.007492473	16.667	0.04	Biological Process	GO:0048305	immunoglobulin secretion	0.007492473	0.016241962	0	0	1	25
GO:0051894 positive regulation of focal adhesion assembly	1	0.007492473	16.667	0.04	Biological Process	GO:0051894	positive regulation of focal adhesion assembly	0.007492473	0.016241962	0	0	1	25
GO:0071624 positive regulation of granulocyte chemotaxis	1	0.007492473	16.667	0.04	Biological Process	GO:0071624	positive regulation of granulocyte chemotaxis	0.007492473	0.016241962	0	0	1	25
GO:0071800 podosome assembly	1	0.007492473	16.667	0.04	Biological Process	GO:0071800	podosome assembly	0.007492473	0.016241962	0	0	1	25
GO:0030099 myeloid cell differentiation	2	0.007538984	33.333	0.004	Biological Process	GO:0030099	myeloid cell differentiation	0.007538984	0.016324769	0	0	2	462
GO:0044271 cellular nitrogen compound biosynthetic process	5	0.007550277	83.333	0.001	Biological Process	GO:0044271	cellular nitrogen compound biosynthetic process	0.007550277	0.016331215	0	0	5	5534
GO:0006909 phagocytosis	2	0.007602418	33.333	0.004	Biological Process	GO:0006909	phagocytosis	0.007602418	0.016416815	0	0	2	464
GO:0010605 negative regulation of macromolecule metabolic process	4	0.007606569	66.667	0.001	Biological Process	GO:0010605	negative regulation of macromolecule metabolic process	0.007606569	0.016416815	0	0	4	3209
GO:0050804 modulation of chemical synaptic transmission	2	0.007762087	33.333	0.004	Biological Process	GO:0050804	modulation of chemical synaptic transmission	0.007762087	0.016602844	0	0	2	469
GO:0002053 positive regulation of mesenchymal cell proliferation	1	0.007791196	16.667	0.038	Biological Process	GO:0002053	positive regulation of mesenchymal cell proliferation	0.007791196	0.016602844	0	0	1	26
GO:0030878 thyroid gland development	1	0.007791196	16.667	0.038	Biological Process	GO:0030878	thyroid gland development	0.007791196	0.016602844	0	0	1	26
GO:0032069 regulation of nuclease activity	1	0.007791196	16.667	0.038	Biological Process	GO:0032069	regulation of nuclease activity	0.007791196	0.016602844	0	0	1	26
GO:0046697 decidualization	1	0.007791196	16.667	0.038	Biological Process	GO:0046697	decidualization	0.007791196	0.016602844	0	0	1	26
GO:0060444 branching involved in mammary gland duct morphogenesis	1	0.007791196	16.667	0.038	Biological Process	GO:0060444	branching involved in mammary gland duct morphogenesis	0.007791196	0.016602844	0	0	1	26
GO:0060706 cell differentiation involved in embryonic placenta development	1	0.007791196	16.667	0.038	Biological Process	GO:0060706	cell differentiation involved in embryonic placenta development	0.007791196	0.016602844	0	0	1	26
GO:0072539 T-helper 17 cell differentiation	1	0.007791196	16.667	0.038	Biological Process	GO:0072539	T-helper 17 cell differentiation	0.007791196	0.016602844	0	0	1	26
GO:1902624 positive regulation of neutrophil migration	1	0.007791196	16.667	0.038	Biological Process	GO:1902624	positive regulation of neutrophil migration	0.007791196	0.016602844	0	0	1	26
GO:1903959 regulation of anion transmembrane transport	1	0.007791196	16.667	0.038	Biological Process	GO:1903959	regulation of anion transmembrane transport	0.007791196	0.016602844	0	0	1	26
GO:1904385 cellular response to angiotensin	1	0.007791196	16.667	0.038	Biological Process	GO:1904385	cellular response to angiotensin	0.007791196	0.016602844	0	0	1	26
GO:0099177 regulation of trans-synaptic signaling	2	0.007794207	33.333	0.004	Biological Process	GO:0099177	regulation of trans-synaptic signaling	0.007794207	0.016602844	0	0	2	470
GO:0005172 vascular endothelial growth factor receptor binding	1	0.004152757	16.667	0.071	Molecular Function	GO:0005172	vascular endothelial growth factor receptor binding	0.004152757	0.016757264	0	0	1	14
GO:0004707 MAP kinase activity	1	0.004448831	16.667	0.067	Molecular Function	GO:0004707	MAP kinase activity	0.004448831	0.016757264	0	0	1	15
GO:0005161 platelet-derived growth factor receptor binding	1	0.004448831	16.667	0.067	Molecular Function	GO:0005161	platelet-derived growth factor receptor binding	0.004448831	0.016757264	0	0	1	15
GO:0032794 GTPase activating protein binding	1	0.004448831	16.667	0.067	Molecular Function	GO:0032794	GTPase activating protein binding	0.004448831	0.016757264	0	0	1	15
GO:0019932 second-messenger-mediated signaling	2	0.007890937	33.333	0.004	Biological Process	GO:0019932	second-messenger-mediated signaling	0.007890937	0.016790682	0	0	2	473
GO:0062012 regulation of small molecule metabolic process	2	0.007923304	33.333	0.004	Biological Process	GO:0062012	regulation of small molecule metabolic process	0.007923304	0.016841308	0	0	2	474
GO:0009059 macromolecule biosynthetic process	5	0.008009653	83.333	0.001	Biological Process	GO:0009059	macromolecule biosynthetic process	0.008009653	0.017006442	0	0	5	5604
GO:0002092 positive regulation of receptor internalization	1	0.008089845	16.667	0.037	Biological Process	GO:0002092	positive regulation of receptor internalization	0.008089845	0.01703036	0	0	1	27
GO:0002360 T cell lineage commitment	1	0.008089845	16.667	0.037	Biological Process	GO:0002360	T cell lineage commitment	0.008089845	0.01703036	0	0	1	27
GO:0060252 positive regulation of glial cell proliferation	1	0.008089845	16.667	0.037	Biological Process	GO:0060252	positive regulation of glial cell proliferation	0.008089845	0.01703036	0	0	1	27
GO:0061217 regulation of mesonephros development	1	0.008089845	16.667	0.037	Biological Process	GO:0061217	regulation of mesonephros development	0.008089845	0.01703036	0	0	1	27
GO:0070102 interleukin-6-mediated signaling pathway	1	0.008089845	16.667	0.037	Biological Process	GO:0070102	interleukin-6-mediated signaling pathway	0.008089845	0.01703036	0	0	1	27
GO:1902175 regulation of oxidative stress-induced intrinsic apoptotic signaling pathway	1	0.008089845	16.667	0.037	Biological Process	GO:1902175	regulation of oxidative stress-induced intrinsic apoptotic signaling pathway	0.008089845	0.01703036	0	0	1	27
GO:1904353 regulation of telomere capping	1	0.008089845	16.667	0.037	Biological Process	GO:1904353	regulation of telomere capping	0.008089845	0.01703036	0	0	1	27
GO:0002252 immune effector process	3	0.008090288	50	0.002	Biological Process	GO:0002252	immune effector process	0.008090288	0.01703036	0	0	3	1569
GO:0004708 MAP kinase kinase activity	1	0.004744833	16.667	0.062	Molecular Function	GO:0004708	MAP kinase kinase activity	0.004744833	0.01729568	0	0	1	16
GO:0007186 G protein-coupled receptor signaling pathway	3	0.008280393	50	0.002	Biological Process	GO:0007186	G protein-coupled receptor signaling pathway	0.008280393	0.017411876	0	0	3	1582
GO:0006959 humoral immune response	2	0.008349686	33.333	0.004	Biological Process	GO:0006959	humoral immune response	0.008349686	0.017415278	0	0	2	487
GO:0010954 positive regulation of protein processing	1	0.008388418	16.667	0.036	Biological Process	GO:0010954	positive regulation of protein processing	0.008388418	0.017415278	0	0	1	28
GO:0022011 myelination in peripheral nervous system	1	0.008388418	16.667	0.036	Biological Process	GO:0022011	myelination in peripheral nervous system	0.008388418	0.017415278	0	0	1	28
GO:0032292 peripheral nervous system axon ensheathment	1	0.008388418	16.667	0.036	Biological Process	GO:0032292	peripheral nervous system axon ensheathment	0.008388418	0.017415278	0	0	1	28
GO:0033598 mammary gland epithelial cell proliferation	1	0.008388418	16.667	0.036	Biological Process	GO:0033598	mammary gland epithelial cell proliferation	0.008388418	0.017415278	0	0	1	28
GO:0045073 regulation of chemokine biosynthetic process	1	0.008388418	16.667	0.036	Biological Process	GO:0045073	regulation of chemokine biosynthetic process	0.008388418	0.017415278	0	0	1	28
GO:0050995 negative regulation of lipid catabolic process	1	0.008388418	16.667	0.036	Biological Process	GO:0050995	negative regulation of lipid catabolic process	0.008388418	0.017415278	0	0	1	28
GO:0051000 positive regulation of nitric-oxide synthase activity	1	0.008388418	16.667	0.036	Biological Process	GO:0051000	positive regulation of nitric-oxide synthase activity	0.008388418	0.017415278	0	0	1	28
GO:1902745 positive regulation of lamellipodium organization	1	0.008388418	16.667	0.036	Biological Process	GO:1902745	positive regulation of lamellipodium organization	0.008388418	0.017415278	0	0	1	28
GO:1903792 negative regulation of anion transport	1	0.008388418	16.667	0.036	Biological Process	GO:1903792	negative regulation of anion transport	0.008388418	0.017415278	0	0	1	28
GO:1904357 negative regulation of telomere maintenance via telomere lengthening	1	0.008388418	16.667	0.036	Biological Process	GO:1904357	negative regulation of telomere maintenance via telomere lengthening	0.008388418	0.017415278	0	0	1	28
GO:2000191 regulation of fatty acid transport	1	0.008388418	16.667	0.036	Biological Process	GO:2000191	regulation of fatty acid transport	0.008388418	0.017415278	0	0	1	28
GO:0051047 positive regulation of secretion	2	0.008416206	33.333	0.004	Biological Process	GO:0051047	positive regulation of secretion	0.008416206	0.017454519	0	0	2	489
GO:0005979 regulation of glycogen biosynthetic process	1	0.008686916	16.667	0.034	Biological Process	GO:0005979	regulation of glycogen biosynthetic process	0.008686916	0.017883756	0	0	1	29
GO:0010962 regulation of glucan biosynthetic process	1	0.008686916	16.667	0.034	Biological Process	GO:0010962	regulation of glucan biosynthetic process	0.008686916	0.017883756	0	0	1	29
GO:0031063 regulation of histone deacetylation	1	0.008686916	16.667	0.034	Biological Process	GO:0031063	regulation of histone deacetylation	0.008686916	0.017883756	0	0	1	29
GO:0042033 chemokine biosynthetic process	1	0.008686916	16.667	0.034	Biological Process	GO:0042033	chemokine biosynthetic process	0.008686916	0.017883756	0	0	1	29
GO:0050755 chemokine metabolic process	1	0.008686916	16.667	0.034	Biological Process	GO:0050755	chemokine metabolic process	0.008686916	0.017883756	0	0	1	29
GO:0090022 regulation of neutrophil chemotaxis	1	0.008686916	16.667	0.034	Biological Process	GO:0090022	regulation of neutrophil chemotaxis	0.008686916	0.017883756	0	0	1	29
GO:1990776 response to angiotensin	1	0.008686916	16.667	0.034	Biological Process	GO:1990776	response to angiotensin	0.008686916	0.017883756	0	0	1	29
GO:0050877 nervous system process	3	0.008744812	50	0.002	Biological Process	GO:0050877	nervous system process	0.008744812	0.017984095	0	0	3	1613
GO:0043254 regulation of protein complex assembly	2	0.008820474	33.333	0.004	Biological Process	GO:0043254	regulation of protein complex assembly	0.008820474	0.018120723	0	0	2	501
GO:0044267 cellular protein metabolic process	5	0.008919508	83.333	0.001	Biological Process	GO:0044267	cellular protein metabolic process	0.008919508	0.018305029	0	0	5	5734
GO:0010800 positive regulation of peptidyl-threonine phosphorylation	1	0.00898534	16.667	0.033	Biological Process	GO:0010800	positive regulation of peptidyl-threonine phosphorylation	0.00898534	0.018382508	0	0	1	30
GO:0046320 regulation of fatty acid oxidation	1	0.00898534	16.667	0.033	Biological Process	GO:0046320	regulation of fatty acid oxidation	0.00898534	0.018382508	0	0	1	30
GO:1903319 positive regulation of protein maturation	1	0.00898534	16.667	0.033	Biological Process	GO:1903319	positive regulation of protein maturation	0.00898534	0.018382508	0	0	1	30
GO:0044260 cellular macromolecule metabolic process	6	0.009007692	100	0.001	Biological Process	GO:0044260	cellular macromolecule metabolic process	0.009007692	0.01840906	0	0	6	9106
GO:0090304 nucleic acid metabolic process	5	0.009051486	83.333	0.001	Biological Process	GO:0090304	nucleic acid metabolic process	0.009051486	0.018479333	0	0	5	5752
GO:0022604 regulation of cell morphogenesis	2	0.009094872	33.333	0.004	Biological Process	GO:0022604	regulation of cell morphogenesis	0.009094872	0.018529387	0	0	2	509
GO:0050769 positive regulation of neurogenesis	2	0.009094872	33.333	0.004	Biological Process	GO:0050769	positive regulation of neurogenesis	0.009094872	0.018529387	0	0	2	509
GO:0010975 regulation of neuron projection development	2	0.00916408	33.333	0.004	Biological Process	GO:0010975	regulation of neuron projection development	0.00916408	0.01865104	0	0	2	511
GO:0002828 regulation of type 2 immune response	1	0.009283688	16.667	0.032	Biological Process	GO:0002828	regulation of type 2 immune response	0.009283688	0.018747918	0	0	1	31
GO:0014044 Schwann cell development	1	0.009283688	16.667	0.032	Biological Process	GO:0014044	Schwann cell development	0.009283688	0.018747918	0	0	1	31
GO:0035767 endothelial cell chemotaxis	1	0.009283688	16.667	0.032	Biological Process	GO:0035767	endothelial cell chemotaxis	0.009283688	0.018747918	0	0	1	31
GO:0045742 positive regulation of epidermal growth factor receptor signaling pathway	1	0.009283688	16.667	0.032	Biological Process	GO:0045742	positive regulation of epidermal growth factor receptor signaling pathway	0.009283688	0.018747918	0	0	1	31
GO:0048841 regulation of axon extension involved in axon guidance	1	0.009283688	16.667	0.032	Biological Process	GO:0048841	regulation of axon extension involved in axon guidance	0.009283688	0.018747918	0	0	1	31
GO:0072538 T-helper 17 type immune response	1	0.009283688	16.667	0.032	Biological Process	GO:0072538	T-helper 17 type immune response	0.009283688	0.018747918	0	0	1	31
GO:1903393 positive regulation of adherens junction organization	1	0.009283688	16.667	0.032	Biological Process	GO:1903393	positive regulation of adherens junction organization	0.009283688	0.018747918	0	0	1	31
GO:0033036 macromolecule localization	4	0.009288047	66.667	0.001	Biological Process	GO:0033036	macromolecule localization	0.009288047	0.018747918	0	0	4	3387
GO:0016049 cell growth	2	0.009303226	33.333	0.004	Biological Process	GO:0016049	cell growth	0.009303226	0.018759277	0	0	2	515
GO:0038128 ERBB2 signaling pathway	1	0.009581962	16.667	0.031	Biological Process	GO:0038128	ERBB2 signaling pathway	0.009581962	0.019227596	0	0	1	32
GO:0045922 negative regulation of fatty acid metabolic process	1	0.009581962	16.667	0.031	Biological Process	GO:0045922	negative regulation of fatty acid metabolic process	0.009581962	0.019227596	0	0	1	32
GO:1901889 negative regulation of cell junction assembly	1	0.009581962	16.667	0.031	Biological Process	GO:1901889	negative regulation of cell junction assembly	0.009581962	0.019227596	0	0	1	32
GO:0006914 autophagy	2	0.009584428	33.333	0.004	Biological Process	GO:0006914	autophagy	0.009584428	0.019227596	0	0	2	523
GO:0061919 process utilizing autophagic mechanism	2	0.009584428	33.333	0.004	Biological Process	GO:0061919	process utilizing autophagic mechanism	0.009584428	0.019227596	0	0	2	523
GO:0010558 negative regulation of macromolecule biosynthetic process	3	0.009802655	50	0.002	Biological Process	GO:0010558	negative regulation of macromolecule biosynthetic process	0.009802655	0.019645321	0	0	3	1680
GO:0010574 regulation of vascular endothelial growth factor production	1	0.009880161	16.667	0.03	Biological Process	GO:0010574	regulation of vascular endothelial growth factor production	0.009880161	0.019680159	0	0	1	33
GO:0034694 response to prostaglandin	1	0.009880161	16.667	0.03	Biological Process	GO:0034694	response to prostaglandin	0.009880161	0.019680159	0	0	1	33
GO:0048011 neurotrophin TRK receptor signaling pathway	1	0.009880161	16.667	0.03	Biological Process	GO:0048011	neurotrophin TRK receptor signaling pathway	0.009880161	0.019680159	0	0	1	33
GO:0055094 response to lipoprotein particle	1	0.009880161	16.667	0.03	Biological Process	GO:0055094	response to lipoprotein particle	0.009880161	0.019680159	0	0	1	33
GO:1901186 positive regulation of ERBB signaling pathway	1	0.009880161	16.667	0.03	Biological Process	GO:1901186	positive regulation of ERBB signaling pathway	0.009880161	0.019680159	0	0	1	33
GO:1902692 regulation of neuroblast proliferation	1	0.009880161	16.667	0.03	Biological Process	GO:1902692	regulation of neuroblast proliferation	0.009880161	0.019680159	0	0	1	33
GO:0009892 negative regulation of metabolic process	4	0.009972917	66.667	0.001	Biological Process	GO:0009892	negative regulation of metabolic process	0.009972917	0.019833607	0	0	4	3453
GO:0090066 regulation of anatomical structure size	2	0.009977395	33.333	0.004	Biological Process	GO:0090066	regulation of anatomical structure size	0.009977395	0.019833607	0	0	2	534
GO:0001569 branching involved in blood vessel morphogenesis	1	0.010178285	16.667	0.029	Biological Process	GO:0001569	branching involved in blood vessel morphogenesis	0.010178285	0.020050303	0	0	1	34
GO:0010464 regulation of mesenchymal cell proliferation	1	0.010178285	16.667	0.029	Biological Process	GO:0010464	regulation of mesenchymal cell proliferation	0.010178285	0.020050303	0	0	1	34
GO:0032770 positive regulation of monooxygenase activity	1	0.010178285	16.667	0.029	Biological Process	GO:0032770	positive regulation of monooxygenase activity	0.010178285	0.020050303	0	0	1	34
GO:0033028 myeloid cell apoptotic process	1	0.010178285	16.667	0.029	Biological Process	GO:0033028	myeloid cell apoptotic process	0.010178285	0.020050303	0	0	1	34
GO:0039694 viral RNA genome replication	1	0.010178285	16.667	0.029	Biological Process	GO:0039694	viral RNA genome replication	0.010178285	0.020050303	0	0	1	34
GO:0043552 positive regulation of phosphatidylinositol 3-kinase activity	1	0.010178285	16.667	0.029	Biological Process	GO:0043552	positive regulation of phosphatidylinositol 3-kinase activity	0.010178285	0.020050303	0	0	1	34
GO:0045907 positive regulation of vasoconstriction	1	0.010178285	16.667	0.029	Biological Process	GO:0045907	positive regulation of vasoconstriction	0.010178285	0.020050303	0	0	1	34
GO:0070528 protein kinase C signaling	1	0.010178285	16.667	0.029	Biological Process	GO:0070528	protein kinase C signaling	0.010178285	0.020050303	0	0	1	34
GO:1902622 regulation of neutrophil migration	1	0.010178285	16.667	0.029	Biological Process	GO:1902622	regulation of neutrophil migration	0.010178285	0.020050303	0	0	1	34
GO:0050708 regulation of protein secretion	2	0.010304329	33.333	0.004	Biological Process	GO:0050708	regulation of protein secretion	0.010304329	0.020278259	0	0	2	543
GO:1901652 response to peptide	2	0.010377641	33.333	0.004	Biological Process	GO:1901652	response to peptide	0.010377641	0.020402089	0	0	2	545
GO:0007263 nitric oxide mediated signal transduction	1	0.010476334	16.667	0.029	Biological Process	GO:0007263	nitric oxide mediated signal transduction	0.010476334	0.020452804	0	0	1	35
GO:0010573 vascular endothelial growth factor production	1	0.010476334	16.667	0.029	Biological Process	GO:0010573	vascular endothelial growth factor production	0.010476334	0.020452804	0	0	1	35
GO:0010765 positive regulation of sodium ion transport	1	0.010476334	16.667	0.029	Biological Process	GO:0010765	positive regulation of sodium ion transport	0.010476334	0.020452804	0	0	1	35
GO:0060603 mammary gland duct morphogenesis	1	0.010476334	16.667	0.029	Biological Process	GO:0060603	mammary gland duct morphogenesis	0.010476334	0.020452804	0	0	1	35
GO:0070873 regulation of glycogen metabolic process	1	0.010476334	16.667	0.029	Biological Process	GO:0070873	regulation of glycogen metabolic process	0.010476334	0.020452804	0	0	1	35
GO:0071402 cellular response to lipoprotein particle stimulus	1	0.010476334	16.667	0.029	Biological Process	GO:0071402	cellular response to lipoprotein particle stimulus	0.010476334	0.020452804	0	0	1	35
GO:1905332 positive regulation of morphogenesis of an epithelium	1	0.010476334	16.667	0.029	Biological Process	GO:1905332	positive regulation of morphogenesis of an epithelium	0.010476334	0.020452804	0	0	1	35
GO:0031435 mitogen-activated protein kinase kinase kinase binding	1	0.005928105	16.667	0.05	Molecular Function	GO:0031435	mitogen-activated protein kinase kinase kinase binding	0.005928105	0.020643294	0	0	1	20
GO:0043168 anion binding	4	0.006028572	66.667	0.001	Molecular Function	GO:0043168	anion binding	0.006028572	0.020643294	0	0	4	3050
GO:0010762 regulation of fibroblast migration	1	0.010774309	16.667	0.028	Biological Process	GO:0010762	regulation of fibroblast migration	0.010774309	0.020827503	0	0	1	36
GO:0016242 negative regulation of macroautophagy	1	0.010774309	16.667	0.028	Biological Process	GO:0016242	negative regulation of macroautophagy	0.010774309	0.020827503	0	0	1	36
GO:0030947 regulation of vascular endothelial growth factor receptor signaling pathway	1	0.010774309	16.667	0.028	Biological Process	GO:0030947	regulation of vascular endothelial growth factor receptor signaling pathway	0.010774309	0.020827503	0	0	1	36
GO:0042462 eye photoreceptor cell development	1	0.010774309	16.667	0.028	Biological Process	GO:0042462	eye photoreceptor cell development	0.010774309	0.020827503	0	0	1	36
GO:0043368 positive T cell selection	1	0.010774309	16.667	0.028	Biological Process	GO:0043368	positive T cell selection	0.010774309	0.020827503	0	0	1	36
GO:0048846 axon extension involved in axon guidance	1	0.010774309	16.667	0.028	Biological Process	GO:0048846	axon extension involved in axon guidance	0.010774309	0.020827503	0	0	1	36
GO:0051385 response to mineralocorticoid	1	0.010774309	16.667	0.028	Biological Process	GO:0051385	response to mineralocorticoid	0.010774309	0.020827503	0	0	1	36
GO:0071868 cellular response to monoamine stimulus	1	0.010774309	16.667	0.028	Biological Process	GO:0071868	cellular response to monoamine stimulus	0.010774309	0.020827503	0	0	1	36
GO:0071870 cellular response to catecholamine stimulus	1	0.010774309	16.667	0.028	Biological Process	GO:0071870	cellular response to catecholamine stimulus	0.010774309	0.020827503	0	0	1	36
GO:1902284 neuron projection extension involved in neuron projection guidance	1	0.010774309	16.667	0.028	Biological Process	GO:1902284	neuron projection extension involved in neuron projection guidance	0.010774309	0.020827503	0	0	1	36
GO:0031327 negative regulation of cellular biosynthetic process	3	0.01095335	50	0.002	Biological Process	GO:0031327	negative regulation of cellular biosynthetic process	0.01095335	0.021152783	0	0	3	1748
GO:0030212 hyaluronan metabolic process	1	0.011072209	16.667	0.027	Biological Process	GO:0030212	hyaluronan metabolic process	0.011072209	0.021215432	0	0	1	37
GO:0032205 negative regulation of telomere maintenance	1	0.011072209	16.667	0.027	Biological Process	GO:0032205	negative regulation of telomere maintenance	0.011072209	0.021215432	0	0	1	37
GO:0032212 positive regulation of telomere maintenance via telomerase	1	0.011072209	16.667	0.027	Biological Process	GO:0032212	positive regulation of telomere maintenance via telomerase	0.011072209	0.021215432	0	0	1	37
GO:0032885 regulation of polysaccharide biosynthetic process	1	0.011072209	16.667	0.027	Biological Process	GO:0032885	regulation of polysaccharide biosynthetic process	0.011072209	0.021215432	0	0	1	37
GO:0042092 type 2 immune response	1	0.011072209	16.667	0.027	Biological Process	GO:0042092	type 2 immune response	0.011072209	0.021215432	0	0	1	37
GO:0043114 regulation of vascular permeability	1	0.011072209	16.667	0.027	Biological Process	GO:0043114	regulation of vascular permeability	0.011072209	0.021215432	0	0	1	37
GO:0070050 neuron cellular homeostasis	1	0.011072209	16.667	0.027	Biological Process	GO:0070050	neuron cellular homeostasis	0.011072209	0.021215432	0	0	1	37
GO:1901890 positive regulation of cell junction assembly	1	0.011072209	16.667	0.027	Biological Process	GO:1901890	positive regulation of cell junction assembly	0.011072209	0.021215432	0	0	1	37
GO:0007423 sensory organ development	2	0.011123894	33.333	0.004	Biological Process	GO:0007423	sensory organ development	0.011123894	0.021272958	0	0	2	565
GO:0008015 blood circulation	2	0.011123894	33.333	0.004	Biological Process	GO:0008015	blood circulation	0.011123894	0.021272958	0	0	2	565
GO:0009890 negative regulation of biosynthetic process	3	0.011360424	50	0.002	Biological Process	GO:0009890	negative regulation of biosynthetic process	0.011360424	0.021492537	0	0	3	1771
GO:0002724 regulation of T cell cytokine production	1	0.011370034	16.667	0.026	Biological Process	GO:0002724	regulation of T cell cytokine production	0.011370034	0.021492537	0	0	1	38
GO:0036003 positive regulation of transcription from RNA polymerase II promoter in response to stress	1	0.011370034	16.667	0.026	Biological Process	GO:0036003	positive regulation of transcription from RNA polymerase II promoter in response to stress	0.011370034	0.021492537	0	0	1	38
GO:0042036 negative regulation of cytokine biosynthetic process	1	0.011370034	16.667	0.026	Biological Process	GO:0042036	negative regulation of cytokine biosynthetic process	0.011370034	0.021492537	0	0	1	38
GO:0046326 positive regulation of glucose import	1	0.011370034	16.667	0.026	Biological Process	GO:0046326	positive regulation of glucose import	0.011370034	0.021492537	0	0	1	38
GO:0046329 negative regulation of JNK cascade	1	0.011370034	16.667	0.026	Biological Process	GO:0046329	negative regulation of JNK cascade	0.011370034	0.021492537	0	0	1	38
GO:0048143 astrocyte activation	1	0.011370034	16.667	0.026	Biological Process	GO:0048143	astrocyte activation	0.011370034	0.021492537	0	0	1	38
GO:0060045 positive regulation of cardiac muscle cell proliferation	1	0.011370034	16.667	0.026	Biological Process	GO:0060045	positive regulation of cardiac muscle cell proliferation	0.011370034	0.021492537	0	0	1	38
GO:0060416 response to growth hormone	1	0.011370034	16.667	0.026	Biological Process	GO:0060416	response to growth hormone	0.011370034	0.021492537	0	0	1	38
GO:0090218 positive regulation of lipid kinase activity	1	0.011370034	16.667	0.026	Biological Process	GO:0090218	positive regulation of lipid kinase activity	0.011370034	0.021492537	0	0	1	38
GO:0150078 positive regulation of neuroinflammatory response	1	0.011370034	16.667	0.026	Biological Process	GO:0150078	positive regulation of neuroinflammatory response	0.011370034	0.021492537	0	0	1	38
GO:1900745 positive regulation of p38MAPK cascade	1	0.011370034	16.667	0.026	Biological Process	GO:1900745	positive regulation of p38MAPK cascade	0.011370034	0.021492537	0	0	1	38
GO:0002791 regulation of peptide secretion	2	0.011429053	33.333	0.003	Biological Process	GO:0002791	regulation of peptide secretion	0.011429053	0.021583327	0	0	2	573
GO:0003013 circulatory system process	2	0.011467464	33.333	0.003	Biological Process	GO:0003013	circulatory system process	0.011467464	0.021635062	0	0	2	574
GO:0005158 insulin receptor binding	1	0.006519301	16.667	0.045	Molecular Function	GO:0005158	insulin receptor binding	0.006519301	0.021667088	0	0	1	22
GO:0072594 establishment of protein localization to organelle	2	0.011583052	33.333	0.003	Biological Process	GO:0072594	establishment of protein localization to organelle	0.011583052	0.021762134	0	0	2	577
GO:0051962 positive regulation of nervous system development	2	0.011621699	33.333	0.003	Biological Process	GO:0051962	positive regulation of nervous system development	0.011621699	0.021762134	0	0	2	578
GO:0009112 nucleobase metabolic process	1	0.011667784	16.667	0.026	Biological Process	GO:0009112	nucleobase metabolic process	0.011667784	0.021762134	0	0	1	39
GO:0014037 Schwann cell differentiation	1	0.011667784	16.667	0.026	Biological Process	GO:0014037	Schwann cell differentiation	0.011667784	0.021762134	0	0	1	39
GO:0030224 monocyte differentiation	1	0.011667784	16.667	0.026	Biological Process	GO:0030224	monocyte differentiation	0.011667784	0.021762134	0	0	1	39
GO:0032094 response to food	1	0.011667784	16.667	0.026	Biological Process	GO:0032094	response to food	0.011667784	0.021762134	0	0	1	39
GO:0038179 neurotrophin signaling pathway	1	0.011667784	16.667	0.026	Biological Process	GO:0038179	neurotrophin signaling pathway	0.011667784	0.021762134	0	0	1	39
GO:0042307 positive regulation of protein import into nucleus	1	0.011667784	16.667	0.026	Biological Process	GO:0042307	positive regulation of protein import into nucleus	0.011667784	0.021762134	0	0	1	39
GO:0048009 insulin-like growth factor receptor signaling pathway	1	0.011667784	16.667	0.026	Biological Process	GO:0048009	insulin-like growth factor receptor signaling pathway	0.011667784	0.021762134	0	0	1	39
GO:0051973 positive regulation of telomerase activity	1	0.011667784	16.667	0.026	Biological Process	GO:0051973	positive regulation of telomerase activity	0.011667784	0.021762134	0	0	1	39
GO:0090050 positive regulation of cell migration involved in sprouting angiogenesis	1	0.011667784	16.667	0.026	Biological Process	GO:0090050	positive regulation of cell migration involved in sprouting angiogenesis	0.011667784	0.021762134	0	0	1	39
GO:1903131 mononuclear cell differentiation	1	0.011667784	16.667	0.026	Biological Process	GO:1903131	mononuclear cell differentiation	0.011667784	0.021762134	0	0	1	39
GO:0002009 morphogenesis of an epithelium	2	0.011815821	33.333	0.003	Biological Process	GO:0002009	morphogenesis of an epithelium	0.011815821	0.022017336	0	0	2	583
GO:0043029 T cell homeostasis	1	0.011965459	16.667	0.025	Biological Process	GO:0043029	T cell homeostasis	0.011965459	0.022099019	0	0	1	40
GO:0045746 negative regulation of Notch signaling pathway	1	0.011965459	16.667	0.025	Biological Process	GO:0045746	negative regulation of Notch signaling pathway	0.011965459	0.022099019	0	0	1	40
GO:0048566 embryonic digestive tract development	1	0.011965459	16.667	0.025	Biological Process	GO:0048566	embryonic digestive tract development	0.011965459	0.022099019	0	0	1	40
GO:0071867 response to monoamine	1	0.011965459	16.667	0.025	Biological Process	GO:0071867	response to monoamine	0.011965459	0.022099019	0	0	1	40
GO:0071869 response to catecholamine	1	0.011965459	16.667	0.025	Biological Process	GO:0071869	response to catecholamine	0.011965459	0.022099019	0	0	1	40
GO:0072595 maintenance of protein localization in organelle	1	0.011965459	16.667	0.025	Biological Process	GO:0072595	maintenance of protein localization in organelle	0.011965459	0.022099019	0	0	1	40
GO:1904358 positive regulation of telomere maintenance via telomere lengthening	1	0.011965459	16.667	0.025	Biological Process	GO:1904358	positive regulation of telomere maintenance via telomere lengthening	0.011965459	0.022099019	0	0	1	40
GO:2000279 negative regulation of DNA biosynthetic process	1	0.011965459	16.667	0.025	Biological Process	GO:2000279	negative regulation of DNA biosynthetic process	0.011965459	0.022099019	0	0	1	40
GO:2000648 positive regulation of stem cell proliferation	1	0.011965459	16.667	0.025	Biological Process	GO:2000648	positive regulation of stem cell proliferation	0.011965459	0.022099019	0	0	1	40
GO:0010720 positive regulation of cell development	2	0.011972177	33.333	0.003	Biological Process	GO:0010720	positive regulation of cell development	0.011972177	0.022099019	0	0	2	587
GO:0044089 positive regulation of cellular component biogenesis	2	0.012090062	33.333	0.003	Biological Process	GO:0044089	positive regulation of cellular component biogenesis	0.012090062	0.022295663	0	0	2	590
GO:0002446 neutrophil mediated immunity	2	0.012129474	33.333	0.003	Biological Process	GO:0002446	neutrophil mediated immunity	0.012129474	0.022347361	0	0	2	591
GO:0007507 heart development	2	0.012208474	33.333	0.003	Biological Process	GO:0007507	heart development	0.012208474	0.022425186	0	0	2	593
GO:1902532 negative regulation of intracellular signal transduction	2	0.012208474	33.333	0.003	Biological Process	GO:1902532	negative regulation of intracellular signal transduction	0.012208474	0.022425186	0	0	2	593
GO:0002675 positive regulation of acute inflammatory response	1	0.01226306	16.667	0.024	Biological Process	GO:0002675	positive regulation of acute inflammatory response	0.01226306	0.022425186	0	0	1	41
GO:0009268 response to pH	1	0.01226306	16.667	0.024	Biological Process	GO:0009268	response to pH	0.01226306	0.022425186	0	0	1	41
GO:0031641 regulation of myelination	1	0.01226306	16.667	0.024	Biological Process	GO:0031641	regulation of myelination	0.01226306	0.022425186	0	0	1	41
GO:0048710 regulation of astrocyte differentiation	1	0.01226306	16.667	0.024	Biological Process	GO:0048710	regulation of astrocyte differentiation	0.01226306	0.022425186	0	0	1	41
GO:0071542 dopaminergic neuron differentiation	1	0.01226306	16.667	0.024	Biological Process	GO:0071542	dopaminergic neuron differentiation	0.01226306	0.022425186	0	0	1	41
GO:1904591 positive regulation of protein import	1	0.01226306	16.667	0.024	Biological Process	GO:1904591	positive regulation of protein import	0.01226306	0.022425186	0	0	1	41
GO:0042119 neutrophil activation	2	0.012287709	33.333	0.003	Biological Process	GO:0042119	neutrophil activation	0.012287709	0.022449359	0	0	2	595
GO:0030225 macrophage differentiation	1	0.012560586	16.667	0.024	Biological Process	GO:0030225	macrophage differentiation	0.012560586	0.022841659	0	0	1	42
GO:0033146 regulation of intracellular estrogen receptor signaling pathway	1	0.012560586	16.667	0.024	Biological Process	GO:0033146	regulation of intracellular estrogen receptor signaling pathway	0.012560586	0.022841659	0	0	1	42
GO:0090184 positive regulation of kidney development	1	0.012560586	16.667	0.024	Biological Process	GO:0090184	positive regulation of kidney development	0.012560586	0.022841659	0	0	1	42
GO:0098751 bone cell development	1	0.012560586	16.667	0.024	Biological Process	GO:0098751	bone cell development	0.012560586	0.022841659	0	0	1	42
GO:1902667 regulation of axon guidance	1	0.012560586	16.667	0.024	Biological Process	GO:1902667	regulation of axon guidance	0.012560586	0.022841659	0	0	1	42
GO:0036230 granulocyte activation	2	0.01264716	33.333	0.003	Biological Process	GO:0036230	granulocyte activation	0.01264716	0.022977819	0	0	2	604
GO:0001819 positive regulation of cytokine production	2	0.012687391	33.333	0.003	Biological Process	GO:0001819	positive regulation of cytokine production	0.012687391	0.023029608	0	0	2	605
GO:0032881 regulation of polysaccharide metabolic process	1	0.012858038	16.667	0.023	Biological Process	GO:0032881	regulation of polysaccharide metabolic process	0.012858038	0.023274826	0	0	1	43
GO:0035886 vascular smooth muscle cell differentiation	1	0.012858038	16.667	0.023	Biological Process	GO:0035886	vascular smooth muscle cell differentiation	0.012858038	0.023274826	0	0	1	43
GO:0051602 response to electrical stimulus	1	0.012858038	16.667	0.023	Biological Process	GO:0051602	response to electrical stimulus	0.012858038	0.023274826	0	0	1	43
GO:0008631 intrinsic apoptotic signaling pathway in response to oxidative stress	1	0.013155414	16.667	0.023	Biological Process	GO:0008631	intrinsic apoptotic signaling pathway in response to oxidative stress	0.013155414	0.02366047	0	0	1	44
GO:0010761 fibroblast migration	1	0.013155414	16.667	0.023	Biological Process	GO:0010761	fibroblast migration	0.013155414	0.02366047	0	0	1	44
GO:0010828 positive regulation of glucose transmembrane transport	1	0.013155414	16.667	0.023	Biological Process	GO:0010828	positive regulation of glucose transmembrane transport	0.013155414	0.02366047	0	0	1	44
GO:0045773 positive regulation of axon extension	1	0.013155414	16.667	0.023	Biological Process	GO:0045773	positive regulation of axon extension	0.013155414	0.02366047	0	0	1	44
GO:0060251 regulation of glial cell proliferation	1	0.013155414	16.667	0.023	Biological Process	GO:0060251	regulation of glial cell proliferation	0.013155414	0.02366047	0	0	1	44
GO:0071622 regulation of granulocyte chemotaxis	1	0.013155414	16.667	0.023	Biological Process	GO:0071622	regulation of granulocyte chemotaxis	0.013155414	0.02366047	0	0	1	44
GO:2000008 regulation of protein localization to cell surface	1	0.013155414	16.667	0.023	Biological Process	GO:2000008	regulation of protein localization to cell surface	0.013155414	0.02366047	0	0	1	44
GO:0008353 RNA polymerase II CTD heptapeptide repeat kinase activity	1	0.007405546	16.667	0.04	Molecular Function	GO:0008353	RNA polymerase II CTD heptapeptide repeat kinase activity	0.007405546	0.023909334	0	0	1	25
GO:0032965 regulation of collagen biosynthetic process	1	0.013452716	16.667	0.022	Biological Process	GO:0032965	regulation of collagen biosynthetic process	0.013452716	0.024106875	0	0	1	45
GO:0034198 cellular response to amino acid starvation	1	0.013452716	16.667	0.022	Biological Process	GO:0034198	cellular response to amino acid starvation	0.013452716	0.024106875	0	0	1	45
GO:0090311 regulation of protein deacetylation	1	0.013452716	16.667	0.022	Biological Process	GO:0090311	regulation of protein deacetylation	0.013452716	0.024106875	0	0	1	45
GO:1903053 regulation of extracellular matrix organization	1	0.013452716	16.667	0.022	Biological Process	GO:1903053	regulation of extracellular matrix organization	0.013452716	0.024106875	0	0	1	45
GO:0001953 negative regulation of cell-matrix adhesion	1	0.013749944	16.667	0.022	Biological Process	GO:0001953	negative regulation of cell-matrix adhesion	0.013749944	0.024505344	0	0	1	46
GO:0002251 organ or tissue specific immune response	1	0.013749944	16.667	0.022	Biological Process	GO:0002251	organ or tissue specific immune response	0.013749944	0.024505344	0	0	1	46
GO:0010463 mesenchymal cell proliferation	1	0.013749944	16.667	0.022	Biological Process	GO:0010463	mesenchymal cell proliferation	0.013749944	0.024505344	0	0	1	46
GO:0031648 protein destabilization	1	0.013749944	16.667	0.022	Biological Process	GO:0031648	protein destabilization	0.013749944	0.024505344	0	0	1	46
GO:0038084 vascular endothelial growth factor signaling pathway	1	0.013749944	16.667	0.022	Biological Process	GO:0038084	vascular endothelial growth factor signaling pathway	0.013749944	0.024505344	0	0	1	46
GO:1903978 regulation of microglial cell activation	1	0.013749944	16.667	0.022	Biological Process	GO:1903978	regulation of microglial cell activation	0.013749944	0.024505344	0	0	1	46
GO:0001968 fibronectin binding	1	0.00799601	16.667	0.037	Molecular Function	GO:0001968	fibronectin binding	0.00799601	0.024655208	0	0	1	27
GO:0004674 protein serine/threonine kinase activity	2	0.008195203	33.333	0.004	Molecular Function	GO:0004674	protein serine/threonine kinase activity	0.008195203	0.024655208	0	0	2	488
GO:0043325 phosphatidylinositol-3,4-bisphosphate binding	1	0.008291132	16.667	0.036	Molecular Function	GO:0043325	phosphatidylinositol-3,4-bisphosphate binding	0.008291132	0.024655208	0	0	1	28
GO:0044057 regulation of system process	2	0.013879331	33.333	0.003	Biological Process	GO:0044057	regulation of system process	0.013879331	0.024713515	0	0	2	634
GO:0010467 gene expression	5	0.013900673	83.333	0.001	Biological Process	GO:0010467	gene expression	0.013900673	0.024729095	0	0	5	6306
GO:0002639 positive regulation of immunoglobulin production	1	0.014047096	16.667	0.021	Biological Process	GO:0002639	positive regulation of immunoglobulin production	0.014047096	0.024854502	0	0	1	47
GO:0022602 ovulation cycle process	1	0.014047096	16.667	0.021	Biological Process	GO:0022602	ovulation cycle process	0.014047096	0.024854502	0	0	1	47
GO:0032459 regulation of protein oligomerization	1	0.014047096	16.667	0.021	Biological Process	GO:0032459	regulation of protein oligomerization	0.014047096	0.024854502	0	0	1	47
GO:0055023 positive regulation of cardiac muscle tissue growth	1	0.014047096	16.667	0.021	Biological Process	GO:0055023	positive regulation of cardiac muscle tissue growth	0.014047096	0.024854502	0	0	1	47
GO:0071354 cellular response to interleukin-6	1	0.014047096	16.667	0.021	Biological Process	GO:0071354	cellular response to interleukin-6	0.014047096	0.024854502	0	0	1	47
GO:0071364 cellular response to epidermal growth factor stimulus	1	0.014047096	16.667	0.021	Biological Process	GO:0071364	cellular response to epidermal growth factor stimulus	0.014047096	0.024854502	0	0	1	47
GO:0046875 ephrin receptor binding	1	0.008586181	16.667	0.034	Molecular Function	GO:0046875	ephrin receptor binding	0.008586181	0.024877909	0	0	1	29
GO:0001754 eye photoreceptor cell differentiation	1	0.014344175	16.667	0.021	Biological Process	GO:0001754	eye photoreceptor cell differentiation	0.014344175	0.025131096	0	0	1	48
GO:0002369 T cell cytokine production	1	0.014344175	16.667	0.021	Biological Process	GO:0002369	T cell cytokine production	0.014344175	0.025131096	0	0	1	48
GO:0003254 regulation of membrane depolarization	1	0.014344175	16.667	0.021	Biological Process	GO:0003254	regulation of membrane depolarization	0.014344175	0.025131096	0	0	1	48
GO:0010799 regulation of peptidyl-threonine phosphorylation	1	0.014344175	16.667	0.021	Biological Process	GO:0010799	regulation of peptidyl-threonine phosphorylation	0.014344175	0.025131096	0	0	1	48
GO:0032369 negative regulation of lipid transport	1	0.014344175	16.667	0.021	Biological Process	GO:0032369	negative regulation of lipid transport	0.014344175	0.025131096	0	0	1	48
GO:0032570 response to progesterone	1	0.014344175	16.667	0.021	Biological Process	GO:0032570	response to progesterone	0.014344175	0.025131096	0	0	1	48
GO:0042461 photoreceptor cell development	1	0.014344175	16.667	0.021	Biological Process	GO:0042461	photoreceptor cell development	0.014344175	0.025131096	0	0	1	48
GO:0060443 mammary gland morphogenesis	1	0.014344175	16.667	0.021	Biological Process	GO:0060443	mammary gland morphogenesis	0.014344175	0.025131096	0	0	1	48
GO:1902743 regulation of lamellipodium organization	1	0.014344175	16.667	0.021	Biological Process	GO:1902743	regulation of lamellipodium organization	0.014344175	0.025131096	0	0	1	48
GO:1903587 regulation of blood vessel endothelial cell proliferation involved in sprouting angiogenesis	1	0.014344175	16.667	0.021	Biological Process	GO:1903587	regulation of blood vessel endothelial cell proliferation involved in sprouting angiogenesis	0.014344175	0.025131096	0	0	1	48
GO:1990928 response to amino acid starvation	1	0.014344175	16.667	0.021	Biological Process	GO:1990928	response to amino acid starvation	0.014344175	0.025131096	0	0	1	48
GO:0002444 myeloid leukocyte mediated immunity	2	0.014429391	33.333	0.003	Biological Process	GO:0002444	myeloid leukocyte mediated immunity	0.014429391	0.025257864	0	0	2	647
GO:0005975 carbohydrate metabolic process	2	0.014472104	33.333	0.003	Biological Process	GO:0005975	carbohydrate metabolic process	0.014472104	0.025310073	0	0	2	648
GO:0002429 immune response-activating cell surface receptor signaling pathway	2	0.014514874	33.333	0.003	Biological Process	GO:0002429	immune response-activating cell surface receptor signaling pathway	0.014514874	0.025362289	0	0	2	649
GO:0005978 glycogen biosynthetic process	1	0.014641178	16.667	0.02	Biological Process	GO:0005978	glycogen biosynthetic process	0.014641178	0.025469685	0	0	1	49
GO:0006984 ER-nucleus signaling pathway	1	0.014641178	16.667	0.02	Biological Process	GO:0006984	ER-nucleus signaling pathway	0.014641178	0.025469685	0	0	1	49
GO:0009250 glucan biosynthetic process	1	0.014641178	16.667	0.02	Biological Process	GO:0009250	glucan biosynthetic process	0.014641178	0.025469685	0	0	1	49
GO:0045058 T cell selection	1	0.014641178	16.667	0.02	Biological Process	GO:0045058	T cell selection	0.014641178	0.025469685	0	0	1	49
GO:0048538 thymus development	1	0.014641178	16.667	0.02	Biological Process	GO:0048538	thymus development	0.014641178	0.025469685	0	0	1	49
GO:0097190 apoptotic signaling pathway	2	0.014729583	33.333	0.003	Biological Process	GO:0097190	apoptotic signaling pathway	0.014729583	0.025600797	0	0	2	654
GO:0031349 positive regulation of defense response	2	0.014772696	33.333	0.003	Biological Process	GO:0031349	positive regulation of defense response	0.014772696	0.025653028	0	0	2	655
GO:0010712 regulation of collagen metabolic process	1	0.014938107	16.667	0.02	Biological Process	GO:0010712	regulation of collagen metabolic process	0.014938107	0.025758071	0	0	1	50
GO:0032873 negative regulation of stress-activated MAPK cascade	1	0.014938107	16.667	0.02	Biological Process	GO:0032873	negative regulation of stress-activated MAPK cascade	0.014938107	0.025758071	0	0	1	50
GO:0060324 face development	1	0.014938107	16.667	0.02	Biological Process	GO:0060324	face development	0.014938107	0.025758071	0	0	1	50
GO:0060976 coronary vasculature development	1	0.014938107	16.667	0.02	Biological Process	GO:0060976	coronary vasculature development	0.014938107	0.025758071	0	0	1	50
GO:0070303 negative regulation of stress-activated protein kinase signaling cascade	1	0.014938107	16.667	0.02	Biological Process	GO:0070303	negative regulation of stress-activated protein kinase signaling cascade	0.014938107	0.025758071	0	0	1	50
GO:1901099 negative regulation of signal transduction in absence of ligand	1	0.014938107	16.667	0.02	Biological Process	GO:1901099	negative regulation of signal transduction in absence of ligand	0.014938107	0.025758071	0	0	1	50
GO:1903727 positive regulation of phospholipid metabolic process	1	0.014938107	16.667	0.02	Biological Process	GO:1903727	positive regulation of phospholipid metabolic process	0.014938107	0.025758071	0	0	1	50
GO:2001240 negative regulation of extrinsic apoptotic signaling pathway in absence of ligand	1	0.014938107	16.667	0.02	Biological Process	GO:2001240	negative regulation of extrinsic apoptotic signaling pathway in absence of ligand	0.014938107	0.025758071	0	0	1	50
GO:0046907 intracellular transport	3	0.015056888	50	0.002	Biological Process	GO:0046907	intracellular transport	0.015056888	0.025940112	0	0	3	1960
GO:1905114 cell surface receptor signaling pathway involved in cell-cell signaling	2	0.015163272	33.333	0.003	Biological Process	GO:1905114	cell surface receptor signaling pathway involved in cell-cell signaling	0.015163272	0.02599606	0	0	2	664
GO:0002686 negative regulation of leukocyte migration	1	0.015234962	16.667	0.02	Biological Process	GO:0002686	negative regulation of leukocyte migration	0.015234962	0.02599606	0	0	1	51
GO:0010718 positive regulation of epithelial to mesenchymal transition	1	0.015234962	16.667	0.02	Biological Process	GO:0010718	positive regulation of epithelial to mesenchymal transition	0.015234962	0.02599606	0	0	1	51
GO:0014911 positive regulation of smooth muscle cell migration	1	0.015234962	16.667	0.02	Biological Process	GO:0014911	positive regulation of smooth muscle cell migration	0.015234962	0.02599606	0	0	1	51
GO:0045429 positive regulation of nitric oxide biosynthetic process	1	0.015234962	16.667	0.02	Biological Process	GO:0045429	positive regulation of nitric oxide biosynthetic process	0.015234962	0.02599606	0	0	1	51
GO:0060421 positive regulation of heart growth	1	0.015234962	16.667	0.02	Biological Process	GO:0060421	positive regulation of heart growth	0.015234962	0.02599606	0	0	1	51
GO:0070741 response to interleukin-6	1	0.015234962	16.667	0.02	Biological Process	GO:0070741	response to interleukin-6	0.015234962	0.02599606	0	0	1	51
GO:0090199 regulation of release of cytochrome c from mitochondria	1	0.015234962	16.667	0.02	Biological Process	GO:0090199	regulation of release of cytochrome c from mitochondria	0.015234962	0.02599606	0	0	1	51
GO:1900087 positive regulation of G1/S transition of mitotic cell cycle	1	0.015234962	16.667	0.02	Biological Process	GO:1900087	positive regulation of G1/S transition of mitotic cell cycle	0.015234962	0.02599606	0	0	1	51
GO:1904037 positive regulation of epithelial cell apoptotic process	1	0.015234962	16.667	0.02	Biological Process	GO:1904037	positive regulation of epithelial cell apoptotic process	0.015234962	0.02599606	0	0	1	51
GO:1904407 positive regulation of nitric oxide metabolic process	1	0.015234962	16.667	0.02	Biological Process	GO:1904407	positive regulation of nitric oxide metabolic process	0.015234962	0.02599606	0	0	1	51
GO:0009306 protein secretion	2	0.015250691	33.333	0.003	Biological Process	GO:0009306	protein secretion	0.015250691	0.026000311	0	0	2	666
GO:0005524 ATP binding	3	0.009235176	50	0.002	Molecular Function	GO:0005524	ATP binding	0.009235176	0.026089374	0	0	3	1664
GO:0051721 protein phosphatase 2A binding	1	0.009470889	16.667	0.031	Molecular Function	GO:0051721	protein phosphatase 2A binding	0.009470889	0.026102694	0	0	1	32
GO:0001954 positive regulation of cell-matrix adhesion	1	0.015531741	16.667	0.019	Biological Process	GO:0001954	positive regulation of cell-matrix adhesion	0.015531741	0.02643357	0	0	1	52
GO:0043330 response to exogenous dsRNA	1	0.015531741	16.667	0.019	Biological Process	GO:0043330	response to exogenous dsRNA	0.015531741	0.02643357	0	0	1	52
GO:0034613 cellular protein localization	3	0.015550372	50	0.002	Biological Process	GO:0034613	cellular protein localization	0.015550372	0.026442364	0	0	3	1983
GO:0071889 14-3-3 protein binding	1	0.010060329	16.667	0.029	Molecular Function	GO:0071889	14-3-3 protein binding	0.010060329	0.026577154	0	0	1	34
GO:0032559 adenyl ribonucleotide binding	3	0.010165877	50	0.002	Molecular Function	GO:0032559	adenyl ribonucleotide binding	0.010165877	0.026577154	0	0	3	1722
GO:0030554 adenyl nucleotide binding	3	0.010348626	50	0.002	Molecular Function	GO:0030554	adenyl nucleotide binding	0.010348626	0.026577154	0	0	3	1733
GO:0006139 nucleobase-containing compound metabolic process	5	0.015669687	83.333	0.001	Biological Process	GO:0006139	nucleobase-containing compound metabolic process	0.015669687	0.026622202	0	0	5	6471
GO:0045664 regulation of neuron differentiation	2	0.015779963	33.333	0.003	Biological Process	GO:0045664	regulation of neuron differentiation	0.015779963	0.026753072	0	0	2	678
GO:0070727 cellular macromolecule localization	3	0.01581167	50	0.002	Biological Process	GO:0070727	cellular macromolecule localization	0.01581167	0.026753072	0	0	3	1995
GO:0010883 regulation of lipid storage	1	0.015828447	16.667	0.019	Biological Process	GO:0010883	regulation of lipid storage	0.015828447	0.026753072	0	0	1	53
GO:0070231 T cell apoptotic process	1	0.015828447	16.667	0.019	Biological Process	GO:0070231	T cell apoptotic process	0.015828447	0.026753072	0	0	1	53
GO:1900744 regulation of p38MAPK cascade	1	0.015828447	16.667	0.019	Biological Process	GO:1900744	regulation of p38MAPK cascade	0.015828447	0.026753072	0	0	1	53
GO:2000179 positive regulation of neural precursor cell proliferation	1	0.015828447	16.667	0.019	Biological Process	GO:2000179	positive regulation of neural precursor cell proliferation	0.015828447	0.026753072	0	0	1	53
GO:0006953 acute-phase response	1	0.016125078	16.667	0.019	Biological Process	GO:0006953	acute-phase response	0.016125078	0.027160937	0	0	1	54
GO:0007595 lactation	1	0.016125078	16.667	0.019	Biological Process	GO:0007595	lactation	0.016125078	0.027160937	0	0	1	54
GO:0032964 collagen biosynthetic process	1	0.016125078	16.667	0.019	Biological Process	GO:0032964	collagen biosynthetic process	0.016125078	0.027160937	0	0	1	54
GO:1990090 cellular response to nerve growth factor stimulus	1	0.016125078	16.667	0.019	Biological Process	GO:1990090	cellular response to nerve growth factor stimulus	0.016125078	0.027160937	0	0	1	54
GO:0000186 activation of MAPKK activity	1	0.016421634	16.667	0.018	Biological Process	GO:0000186	activation of MAPKK activity	0.016421634	0.02761309	0	0	1	55
GO:0002043 blood vessel endothelial cell proliferation involved in sprouting angiogenesis	1	0.016421634	16.667	0.018	Biological Process	GO:0002043	blood vessel endothelial cell proliferation involved in sprouting angiogenesis	0.016421634	0.02761309	0	0	1	55
GO:0048260 positive regulation of receptor-mediated endocytosis	1	0.016718116	16.667	0.018	Biological Process	GO:0048260	positive regulation of receptor-mediated endocytosis	0.016718116	0.028087578	0	0	1	56
GO:0002790 peptide secretion	2	0.016862819	33.333	0.003	Biological Process	GO:0002790	peptide secretion	0.016862819	0.028306476	0	0	2	702
GO:0002768 immune response-regulating cell surface receptor signaling pathway	2	0.016908637	33.333	0.003	Biological Process	GO:0002768	immune response-regulating cell surface receptor signaling pathway	0.016908637	0.028359149	0	0	2	703
GO:0051171 regulation of nitrogen compound metabolic process	5	0.016928844	83.333	0.001	Biological Process	GO:0051171	regulation of nitrogen compound metabolic process	0.016928844	0.028367167	0	0	5	6580
GO:0014002 astrocyte development	1	0.017014523	16.667	0.018	Biological Process	GO:0014002	astrocyte development	0.017014523	0.028367167	0	0	1	57
GO:0035094 response to nicotine	1	0.017014523	16.667	0.018	Biological Process	GO:0035094	response to nicotine	0.017014523	0.028367167	0	0	1	57
GO:0042093 T-helper cell differentiation	1	0.017014523	16.667	0.018	Biological Process	GO:0042093	T-helper cell differentiation	0.017014523	0.028367167	0	0	1	57
GO:0045599 negative regulation of fat cell differentiation	1	0.017014523	16.667	0.018	Biological Process	GO:0045599	negative regulation of fat cell differentiation	0.017014523	0.028367167	0	0	1	57
GO:0045744 negative regulation of G protein-coupled receptor signaling pathway	1	0.017014523	16.667	0.018	Biological Process	GO:0045744	negative regulation of G protein-coupled receptor signaling pathway	0.017014523	0.028367167	0	0	1	57
GO:1990089 response to nerve growth factor	1	0.017014523	16.667	0.018	Biological Process	GO:1990089	response to nerve growth factor	0.017014523	0.028367167	0	0	1	57
GO:0019538 protein metabolic process	5	0.01703614	83.333	0.001	Biological Process	GO:0019538	protein metabolic process	0.01703614	0.028379117	0	0	5	6589
GO:0042169 SH2 domain binding	1	0.01153265	16.667	0.026	Molecular Function	GO:0042169	SH2 domain binding	0.01153265	0.028434875	0	0	1	39
GO:0001784 phosphotyrosine residue binding	1	0.011826895	16.667	0.025	Molecular Function	GO:0001784	phosphotyrosine residue binding	0.011826895	0.028434875	0	0	1	40
GO:0005547 phosphatidylinositol-3,4,5-trisphosphate binding	1	0.011826895	16.667	0.025	Molecular Function	GO:0005547	phosphatidylinositol-3,4,5-trisphosphate binding	0.011826895	0.028434875	0	0	1	40
GO:0016233 telomere capping	1	0.017310856	16.667	0.017	Biological Process	GO:0016233	telomere capping	0.017310856	0.028642393	0	0	1	58
GO:0042306 regulation of protein import into nucleus	1	0.017310856	16.667	0.017	Biological Process	GO:0042306	regulation of protein import into nucleus	0.017310856	0.028642393	0	0	1	58
GO:0050994 regulation of lipid catabolic process	1	0.017310856	16.667	0.017	Biological Process	GO:0050994	regulation of lipid catabolic process	0.017310856	0.028642393	0	0	1	58
GO:0060043 regulation of cardiac muscle cell proliferation	1	0.017310856	16.667	0.017	Biological Process	GO:0060043	regulation of cardiac muscle cell proliferation	0.017310856	0.028642393	0	0	1	58
GO:0060425 lung morphogenesis	1	0.017310856	16.667	0.017	Biological Process	GO:0060425	lung morphogenesis	0.017310856	0.028642393	0	0	1	58
GO:0090183 regulation of kidney development	1	0.017310856	16.667	0.017	Biological Process	GO:0090183	regulation of kidney development	0.017310856	0.028642393	0	0	1	58
GO:1900408 negative regulation of cellular response to oxidative stress	1	0.017310856	16.667	0.017	Biological Process	GO:1900408	negative regulation of cellular response to oxidative stress	0.017310856	0.028642393	0	0	1	58
GO:1903202 negative regulation of oxidative stress-induced cell death	1	0.017310856	16.667	0.017	Biological Process	GO:1903202	negative regulation of oxidative stress-induced cell death	0.017310856	0.028642393	0	0	1	58
GO:0002294 CD4-positive, alpha-beta T cell differentiation involved in immune response	1	0.017607114	16.667	0.017	Biological Process	GO:0002294	CD4-positive, alpha-beta T cell differentiation involved in immune response	0.017607114	0.029059136	0	0	1	59
GO:0038066 p38MAPK cascade	1	0.017607114	16.667	0.017	Biological Process	GO:0038066	p38MAPK cascade	0.017607114	0.029059136	0	0	1	59
GO:0043331 response to dsRNA	1	0.017607114	16.667	0.017	Biological Process	GO:0043331	response to dsRNA	0.017607114	0.029059136	0	0	1	59
GO:0046483 heterocycle metabolic process	5	0.017715406	83.333	0.001	Biological Process	GO:0046483	heterocycle metabolic process	0.017715406	0.029213314	0	0	5	6645
GO:0030331 estrogen receptor binding	1	0.012415166	16.667	0.024	Molecular Function	GO:0030331	estrogen receptor binding	0.012415166	0.02922737	0	0	1	42
GO:0005901 caveola	2	0.000245886	33.333	0.023	Cellular Component	GO:0005901	caveola	0.000245886	0.029247864	0	0	2	87
GO:0044853 plasma membrane raft	2	0.000444346	33.333	0.017	Cellular Component	GO:0044853	plasma membrane raft	0.000444346	0.029247864	0	0	2	117
GO:0098794 postsynapse	3	0.000573488	50	0.004	Cellular Component	GO:0098794	postsynapse	0.000573488	0.029247864	0	0	3	667
GO:0002287 alpha-beta T cell activation involved in immune response	1	0.017903298	16.667	0.017	Biological Process	GO:0002287	alpha-beta T cell activation involved in immune response	0.017903298	0.02932617	0	0	1	60
GO:0002293 alpha-beta T cell differentiation involved in immune response	1	0.017903298	16.667	0.017	Biological Process	GO:0002293	alpha-beta T cell differentiation involved in immune response	0.017903298	0.02932617	0	0	1	60
GO:0007405 neuroblast proliferation	1	0.017903298	16.667	0.017	Biological Process	GO:0007405	neuroblast proliferation	0.017903298	0.02932617	0	0	1	60
GO:0014009 glial cell proliferation	1	0.017903298	16.667	0.017	Biological Process	GO:0014009	glial cell proliferation	0.017903298	0.02932617	0	0	1	60
GO:0019229 regulation of vasoconstriction	1	0.017903298	16.667	0.017	Biological Process	GO:0019229	regulation of vasoconstriction	0.017903298	0.02932617	0	0	1	60
GO:0032206 positive regulation of telomere maintenance	1	0.017903298	16.667	0.017	Biological Process	GO:0032206	positive regulation of telomere maintenance	0.017903298	0.02932617	0	0	1	60
GO:0043551 regulation of phosphatidylinositol 3-kinase activity	1	0.017903298	16.667	0.017	Biological Process	GO:0043551	regulation of phosphatidylinositol 3-kinase activity	0.017903298	0.02932617	0	0	1	60
GO:1902883 negative regulation of response to oxidative stress	1	0.017903298	16.667	0.017	Biological Process	GO:1902883	negative regulation of response to oxidative stress	0.017903298	0.02932617	0	0	1	60
GO:0048729 tissue morphogenesis	2	0.018072148	33.333	0.003	Biological Process	GO:0048729	tissue morphogenesis	0.018072148	0.029578082	0	0	2	728
GO:0006508 proteolysis	3	0.018116009	50	0.001	Biological Process	GO:0006508	proteolysis	0.018116009	0.029589103	0	0	3	2096
GO:0001658 branching involved in ureteric bud morphogenesis	1	0.018199408	16.667	0.016	Biological Process	GO:0001658	branching involved in ureteric bud morphogenesis	0.018199408	0.029589103	0	0	1	61
GO:0010823 negative regulation of mitochondrion organization	1	0.018199408	16.667	0.016	Biological Process	GO:0010823	negative regulation of mitochondrion organization	0.018199408	0.029589103	0	0	1	61
GO:0032890 regulation of organic acid transport	1	0.018199408	16.667	0.016	Biological Process	GO:0032890	regulation of organic acid transport	0.018199408	0.029589103	0	0	1	61
GO:0046324 regulation of glucose import	1	0.018199408	16.667	0.016	Biological Process	GO:0046324	regulation of glucose import	0.018199408	0.029589103	0	0	1	61
GO:0061098 positive regulation of protein tyrosine kinase activity	1	0.018199408	16.667	0.016	Biological Process	GO:0061098	positive regulation of protein tyrosine kinase activity	0.018199408	0.029589103	0	0	1	61
GO:1904589 regulation of protein import	1	0.018199408	16.667	0.016	Biological Process	GO:1904589	regulation of protein import	0.018199408	0.029589103	0	0	1	61
GO:2001239 regulation of extrinsic apoptotic signaling pathway in absence of ligand	1	0.018199408	16.667	0.016	Biological Process	GO:2001239	regulation of extrinsic apoptotic signaling pathway in absence of ligand	0.018199408	0.029589103	0	0	1	61
GO:0042802 identical protein binding	3	0.012851997	50	0.002	Molecular Function	GO:0042802	identical protein binding	0.012851997	0.02963828	0	0	3	1873
GO:0006725 cellular aromatic compound metabolic process	5	0.018263368	83.333	0.001	Biological Process	GO:0006725	cellular aromatic compound metabolic process	0.018263368	0.029668531	0	0	5	6689
GO:0007276 gamete generation	2	0.01835653	33.333	0.003	Biological Process	GO:0007276	gamete generation	0.01835653	0.029795226	0	0	2	734
GO:0001836 release of cytochrome c from mitochondria	1	0.018495443	16.667	0.016	Biological Process	GO:0001836	release of cytochrome c from mitochondria	0.018495443	0.029872574	0	0	1	62
GO:0002090 regulation of receptor internalization	1	0.018495443	16.667	0.016	Biological Process	GO:0002090	regulation of receptor internalization	0.018495443	0.029872574	0	0	1	62
GO:0050999 regulation of nitric-oxide synthase activity	1	0.018495443	16.667	0.016	Biological Process	GO:0050999	regulation of nitric-oxide synthase activity	0.018495443	0.029872574	0	0	1	62
GO:0051353 positive regulation of oxidoreductase activity	1	0.018495443	16.667	0.016	Biological Process	GO:0051353	positive regulation of oxidoreductase activity	0.018495443	0.029872574	0	0	1	62
GO:0055025 positive regulation of cardiac muscle tissue development	1	0.018495443	16.667	0.016	Biological Process	GO:0055025	positive regulation of cardiac muscle tissue development	0.018495443	0.029872574	0	0	1	62
GO:1902808 positive regulation of cell cycle G1/S phase transition	1	0.018495443	16.667	0.016	Biological Process	GO:1902808	positive regulation of cell cycle G1/S phase transition	0.018495443	0.029872574	0	0	1	62
GO:0060688 regulation of morphogenesis of a branching structure	1	0.018791404	16.667	0.016	Biological Process	GO:0060688	regulation of morphogenesis of a branching structure	0.018791404	0.030325651	0	0	1	63
GO:0006996 organelle organization	4	0.018927162	66.667	0.001	Biological Process	GO:0006996	organelle organization	0.018927162	0.030506314	0	0	4	4116
GO:1901566 organonitrogen compound biosynthetic process	3	0.018934418	50	0.001	Biological Process	GO:1901566	organonitrogen compound biosynthetic process	0.018934418	0.030506314	0	0	3	2130
GO:0032870 cellular response to hormone stimulus	2	0.018979468	33.333	0.003	Biological Process	GO:0032870	cellular response to hormone stimulus	0.018979468	0.030552109	0	0	2	747
GO:0080090 regulation of primary metabolic process	5	0.019018183	83.333	0.001	Biological Process	GO:0080090	regulation of primary metabolic process	0.019018183	0.030552109	0	0	5	6748
GO:0044249 cellular biosynthetic process	5	0.019031176	83.333	0.001	Biological Process	GO:0044249	cellular biosynthetic process	0.019031176	0.030552109	0	0	5	6749
GO:0002260 lymphocyte homeostasis	1	0.01908729	16.667	0.016	Biological Process	GO:0002260	lymphocyte homeostasis	0.01908729	0.030552109	0	0	1	64
GO:0030520 intracellular estrogen receptor signaling pathway	1	0.01908729	16.667	0.016	Biological Process	GO:0030520	intracellular estrogen receptor signaling pathway	0.01908729	0.030552109	0	0	1	64
GO:0045669 positive regulation of osteoblast differentiation	1	0.01908729	16.667	0.016	Biological Process	GO:0045669	positive regulation of osteoblast differentiation	0.01908729	0.030552109	0	0	1	64
GO:0046626 regulation of insulin receptor signaling pathway	1	0.01908729	16.667	0.016	Biological Process	GO:0046626	regulation of insulin receptor signaling pathway	0.01908729	0.030552109	0	0	1	64
GO:0150077 regulation of neuroinflammatory response	1	0.01908729	16.667	0.016	Biological Process	GO:0150077	regulation of neuroinflammatory response	0.01908729	0.030552109	0	0	1	64
GO:0046530 photoreceptor cell differentiation	1	0.019383102	16.667	0.015	Biological Process	GO:0046530	photoreceptor cell differentiation	0.019383102	0.030924787	0	0	1	65
GO:0048645 animal organ formation	1	0.019383102	16.667	0.015	Biological Process	GO:0048645	animal organ formation	0.019383102	0.030924787	0	0	1	65
GO:1903078 positive regulation of protein localization to plasma membrane	1	0.019383102	16.667	0.015	Biological Process	GO:1903078	positive regulation of protein localization to plasma membrane	0.019383102	0.030924787	0	0	1	65
GO:1903428 positive regulation of reactive oxygen species biosynthetic process	1	0.019383102	16.667	0.015	Biological Process	GO:1903428	positive regulation of reactive oxygen species biosynthetic process	0.019383102	0.030924787	0	0	1	65
GO:0002292 T cell differentiation involved in immune response	1	0.01967884	16.667	0.015	Biological Process	GO:0002292	T cell differentiation involved in immune response	0.01967884	0.031345695	0	0	1	66
GO:0046824 positive regulation of nucleocytoplasmic transport	1	0.01967884	16.667	0.015	Biological Process	GO:0046824	positive regulation of nucleocytoplasmic transport	0.01967884	0.031345695	0	0	1	66
GO:0008144 drug binding	3	0.01394731	50	0.002	Molecular Function	GO:0008144	drug binding	0.01394731	0.031414508	0	0	3	1929
GO:0004715 non-membrane spanning protein tyrosine kinase activity	1	0.014178229	16.667	0.021	Molecular Function	GO:0004715	non-membrane spanning protein tyrosine kinase activity	0.014178229	0.031414508	0	0	1	48
GO:0031323 regulation of cellular metabolic process	5	0.019742879	83.333	0.001	Biological Process	GO:0031323	regulation of cellular metabolic process	0.019742879	0.031422216	0	0	5	6803
GO:0002711 positive regulation of T cell mediated immunity	1	0.019974503	16.667	0.015	Biological Process	GO:0002711	positive regulation of T cell mediated immunity	0.019974503	0.031713763	0	0	1	67
GO:0045600 positive regulation of fat cell differentiation	1	0.019974503	16.667	0.015	Biological Process	GO:0045600	positive regulation of fat cell differentiation	0.019974503	0.031713763	0	0	1	67
GO:0060675 ureteric bud morphogenesis	1	0.019974503	16.667	0.015	Biological Process	GO:0060675	ureteric bud morphogenesis	0.019974503	0.031713763	0	0	1	67
GO:0051129 negative regulation of cellular component organization	2	0.020104167	33.333	0.003	Biological Process	GO:0051129	negative regulation of cellular component organization	0.020104167	0.031893848	0	0	2	770
GO:1901576 organic substance biosynthetic process	5	0.020269278	83.333	0.001	Biological Process	GO:1901576	organic substance biosynthetic process	0.020269278	0.032053511	0	0	5	6842
GO:0060038 cardiac muscle cell proliferation	1	0.020270092	16.667	0.015	Biological Process	GO:0060038	cardiac muscle cell proliferation	0.020270092	0.032053511	0	0	1	68
GO:0072171 mesonephric tubule morphogenesis	1	0.020270092	16.667	0.015	Biological Process	GO:0072171	mesonephric tubule morphogenesis	0.020270092	0.032053511	0	0	1	68
GO:1903672 positive regulation of sprouting angiogenesis	1	0.020270092	16.667	0.015	Biological Process	GO:1903672	positive regulation of sprouting angiogenesis	0.020270092	0.032053511	0	0	1	68
GO:0045309 protein phosphorylated amino acid binding	1	0.014765334	16.667	0.02	Molecular Function	GO:0045309	protein phosphorylated amino acid binding	0.014765334	0.032086206	0	0	1	50
GO:0001960 negative regulation of cytokine-mediated signaling pathway	1	0.020565607	16.667	0.014	Biological Process	GO:0001960	negative regulation of cytokine-mediated signaling pathway	0.020565607	0.032364465	0	0	1	69
GO:0002637 regulation of immunoglobulin production	1	0.020565607	16.667	0.014	Biological Process	GO:0002637	regulation of immunoglobulin production	0.020565607	0.032364465	0	0	1	69
GO:0034394 protein localization to cell surface	1	0.020565607	16.667	0.014	Biological Process	GO:0034394	protein localization to cell surface	0.020565607	0.032364465	0	0	1	69
GO:0043550 regulation of lipid kinase activity	1	0.020565607	16.667	0.014	Biological Process	GO:0043550	regulation of lipid kinase activity	0.020565607	0.032364465	0	0	1	69
GO:0046323 glucose import	1	0.020565607	16.667	0.014	Biological Process	GO:0046323	glucose import	0.020565607	0.032364465	0	0	1	69
GO:0051898 negative regulation of protein kinase B signaling	1	0.020565607	16.667	0.014	Biological Process	GO:0051898	negative regulation of protein kinase B signaling	0.020565607	0.032364465	0	0	1	69
GO:0005896 interleukin-6 receptor complex	1	0.00084682	16.667	0.333	Cellular Component	GO:0005896	interleukin-6 receptor complex	0.00084682	0.032390853	0	0	1	3
GO:0042056 chemoattractant activity	1	0.015645444	16.667	0.019	Molecular Function	GO:0042056	chemoattractant activity	0.015645444	0.032675938	0	0	1	53
GO:0008134 transcription factor binding	2	0.015912983	33.333	0.003	Molecular Function	GO:0008134	transcription factor binding	0.015912983	0.032675938	0	0	2	689
GO:0005070 SH3/SH2 adaptor activity	1	0.015938668	16.667	0.019	Molecular Function	GO:0005070	SH3/SH2 adaptor activity	0.015938668	0.032675938	0	0	1	54
GO:0035639 purine ribonucleoside triphosphate binding	3	0.016193385	50	0.001	Molecular Function	GO:0035639	purine ribonucleoside triphosphate binding	0.016193385	0.032675938	0	0	3	2036
GO:0050840 extracellular matrix binding	1	0.016524899	16.667	0.018	Molecular Function	GO:0050840	extracellular matrix binding	0.016524899	0.032759887	0	0	1	56
GO:2000243 positive regulation of reproductive process	1	0.020861047	16.667	0.014	Biological Process	GO:2000243	positive regulation of reproductive process	0.020861047	0.03280312	0	0	1	70
GO:0033692 cellular polysaccharide biosynthetic process	1	0.021156414	16.667	0.014	Biological Process	GO:0033692	cellular polysaccharide biosynthetic process	0.021156414	0.033187857	0	0	1	71
GO:0072091 regulation of stem cell proliferation	1	0.021156414	16.667	0.014	Biological Process	GO:0072091	regulation of stem cell proliferation	0.021156414	0.033187857	0	0	1	71
GO:1900076 regulation of cellular response to insulin stimulus	1	0.021156414	16.667	0.014	Biological Process	GO:1900076	regulation of cellular response to insulin stimulus	0.021156414	0.033187857	0	0	1	71
GO:0032555 purine ribonucleotide binding	3	0.017657792	50	0.001	Molecular Function	GO:0032555	purine ribonucleotide binding	0.017657792	0.033356499	0	0	3	2101
GO:0097110 scaffold protein binding	1	0.017696487	16.667	0.017	Molecular Function	GO:0097110	scaffold protein binding	0.017696487	0.033356499	0	0	1	60
GO:0017076 purine nucleotide binding	3	0.01795986	50	0.001	Molecular Function	GO:0017076	purine nucleotide binding	0.01795986	0.033356499	0	0	3	2114
GO:0032553 ribonucleotide binding	3	0.018006606	50	0.001	Molecular Function	GO:0032553	ribonucleotide binding	0.018006606	0.033356499	0	0	3	2116
GO:1901360 organic cyclic compound metabolic process	5	0.021382218	83.333	0.001	Biological Process	GO:1901360	organic cyclic compound metabolic process	0.021382218	0.03349058	0	0	5	6922
GO:0001774 microglial cell activation	1	0.021451706	16.667	0.014	Biological Process	GO:0001774	microglial cell activation	0.021451706	0.03349058	0	0	1	72
GO:0002269 leukocyte activation involved in inflammatory response	1	0.021451706	16.667	0.014	Biological Process	GO:0002269	leukocyte activation involved in inflammatory response	0.021451706	0.03349058	0	0	1	72
GO:0015909 long-chain fatty acid transport	1	0.021451706	16.667	0.014	Biological Process	GO:0015909	long-chain fatty acid transport	0.021451706	0.03349058	0	0	1	72
GO:0042698 ovulation cycle	1	0.021451706	16.667	0.014	Biological Process	GO:0042698	ovulation cycle	0.021451706	0.03349058	0	0	1	72
GO:1904377 positive regulation of protein localization to cell periphery	1	0.021451706	16.667	0.014	Biological Process	GO:1904377	positive regulation of protein localization to cell periphery	0.021451706	0.03349058	0	0	1	72
GO:0009058 biosynthetic process	5	0.021524514	83.333	0.001	Biological Process	GO:0009058	biosynthetic process	0.021524514	0.033577558	0	0	5	6932
GO:0010812 negative regulation of cell-substrate adhesion	1	0.021746923	16.667	0.014	Biological Process	GO:0010812	negative regulation of cell-substrate adhesion	0.021746923	0.033790314	0	0	1	73
GO:0051057 positive regulation of small GTPase mediated signal transduction	1	0.021746923	16.667	0.014	Biological Process	GO:0051057	positive regulation of small GTPase mediated signal transduction	0.021746923	0.033790314	0	0	1	73
GO:0060761 negative regulation of response to cytokine stimulus	1	0.021746923	16.667	0.014	Biological Process	GO:0060761	negative regulation of response to cytokine stimulus	0.021746923	0.033790314	0	0	1	73
GO:0071242 cellular response to ammonium ion	1	0.021746923	16.667	0.014	Biological Process	GO:0071242	cellular response to ammonium ion	0.021746923	0.033790314	0	0	1	73
GO:0099601 regulation of neurotransmitter receptor activity	1	0.021746923	16.667	0.014	Biological Process	GO:0099601	regulation of neurotransmitter receptor activity	0.021746923	0.033790314	0	0	1	73
GO:0043170 macromolecule metabolic process	6	0.022014229	100	0.001	Biological Process	GO:0043170	macromolecule metabolic process	0.022014229	0.034087102	0	0	6	10568
GO:0032722 positive regulation of chemokine production	1	0.022042067	16.667	0.014	Biological Process	GO:0032722	positive regulation of chemokine production	0.022042067	0.034087102	0	0	1	74
GO:0043367 CD4-positive, alpha-beta T cell differentiation	1	0.022042067	16.667	0.014	Biological Process	GO:0043367	CD4-positive, alpha-beta T cell differentiation	0.022042067	0.034087102	0	0	1	74
GO:0045428 regulation of nitric oxide biosynthetic process	1	0.022042067	16.667	0.014	Biological Process	GO:0045428	regulation of nitric oxide biosynthetic process	0.022042067	0.034087102	0	0	1	74
GO:0048747 muscle fiber development	1	0.022042067	16.667	0.014	Biological Process	GO:0048747	muscle fiber development	0.022042067	0.034087102	0	0	1	74
GO:0070227 lymphocyte apoptotic process	1	0.022042067	16.667	0.014	Biological Process	GO:0070227	lymphocyte apoptotic process	0.022042067	0.034087102	0	0	1	74
GO:0016043 cellular component organization	5	0.022173712	83.333	0.001	Biological Process	GO:0016043	cellular component organization	0.022173712	0.034263706	0	0	5	6977
GO:0060255 regulation of macromolecule metabolic process	5	0.022319962	83.333	0.001	Biological Process	GO:0060255	regulation of macromolecule metabolic process	0.022319962	0.034407949	0	0	5	6987
GO:0006635 fatty acid beta-oxidation	1	0.022337136	16.667	0.013	Biological Process	GO:0006635	fatty acid beta-oxidation	0.022337136	0.034407949	0	0	1	75
GO:0032768 regulation of monooxygenase activity	1	0.022337136	16.667	0.013	Biological Process	GO:0032768	regulation of monooxygenase activity	0.022337136	0.034407949	0	0	1	75
GO:2000401 regulation of lymphocyte migration	1	0.022337136	16.667	0.013	Biological Process	GO:2000401	regulation of lymphocyte migration	0.022337136	0.034407949	0	0	1	75
GO:0002366 leukocyte activation involved in immune response	2	0.022439011	33.333	0.002	Biological Process	GO:0002366	leukocyte activation involved in immune response	0.022439011	0.034537789	0	0	2	816
GO:0045596 negative regulation of cell differentiation	2	0.022595197	33.333	0.002	Biological Process	GO:0045596	negative regulation of cell differentiation	0.022595197	0.034668296	0	0	2	819
GO:0019915 lipid storage	1	0.022632131	16.667	0.013	Biological Process	GO:0019915	lipid storage	0.022632131	0.034668296	0	0	1	76
GO:0032507 maintenance of protein location in cell	1	0.022632131	16.667	0.013	Biological Process	GO:0032507	maintenance of protein location in cell	0.022632131	0.034668296	0	0	1	76
GO:0048844 artery morphogenesis	1	0.022632131	16.667	0.013	Biological Process	GO:0048844	artery morphogenesis	0.022632131	0.034668296	0	0	1	76
GO:0072078 nephron tubule morphogenesis	1	0.022632131	16.667	0.013	Biological Process	GO:0072078	nephron tubule morphogenesis	0.022632131	0.034668296	0	0	1	76
GO:1903524 positive regulation of blood circulation	1	0.022632131	16.667	0.013	Biological Process	GO:1903524	positive regulation of blood circulation	0.022632131	0.034668296	0	0	1	76
GO:0002263 cell activation involved in immune response	2	0.022647364	33.333	0.002	Biological Process	GO:0002263	cell activation involved in immune response	0.022647364	0.034668296	0	0	2	820
GO:0060322 head development	2	0.022856562	33.333	0.002	Biological Process	GO:0060322	head development	0.022856562	0.034940732	0	0	2	824
GO:0010629 negative regulation of gene expression	3	0.022860917	50	0.001	Biological Process	GO:0010629	negative regulation of gene expression	0.022860917	0.034940732	0	0	3	2282
GO:0008285 negative regulation of cell proliferation	2	0.022908993	33.333	0.002	Biological Process	GO:0008285	negative regulation of cell proliferation	0.022908993	0.034960194	0	0	2	825
GO:0043627 response to estrogen	1	0.022927052	16.667	0.013	Biological Process	GO:0043627	response to estrogen	0.022927052	0.034960194	0	0	1	77
GO:0061515 myeloid cell development	1	0.022927052	16.667	0.013	Biological Process	GO:0061515	myeloid cell development	0.022927052	0.034960194	0	0	1	77
GO:0050896 response to stimulus	6	0.022968644	100	0.001	Biological Process	GO:0050896	response to stimulus	0.022968644	0.034971713	0	0	6	10643
GO:0044281 small molecule metabolic process	3	0.022970219	50	0.001	Biological Process	GO:0044281	small molecule metabolic process	0.022970219	0.034971713	0	0	3	2286
GO:0000271 polysaccharide biosynthetic process	1	0.023221899	16.667	0.013	Biological Process	GO:0000271	polysaccharide biosynthetic process	0.023221899	0.035218386	0	0	1	78
GO:0005977 glycogen metabolic process	1	0.023221899	16.667	0.013	Biological Process	GO:0005977	glycogen metabolic process	0.023221899	0.035218386	0	0	1	78
GO:0055021 regulation of cardiac muscle tissue growth	1	0.023221899	16.667	0.013	Biological Process	GO:0055021	regulation of cardiac muscle tissue growth	0.023221899	0.035218386	0	0	1	78
GO:0072088 nephron epithelium morphogenesis	1	0.023221899	16.667	0.013	Biological Process	GO:0072088	nephron epithelium morphogenesis	0.023221899	0.035218386	0	0	1	78
GO:1903201 regulation of oxidative stress-induced cell death	1	0.023221899	16.667	0.013	Biological Process	GO:1903201	regulation of oxidative stress-induced cell death	0.023221899	0.035218386	0	0	1	78
GO:0001570 vasculogenesis	1	0.023516671	16.667	0.013	Biological Process	GO:0001570	vasculogenesis	0.023516671	0.035337982	0	0	1	79
GO:0003151 outflow tract morphogenesis	1	0.023516671	16.667	0.013	Biological Process	GO:0003151	outflow tract morphogenesis	0.023516671	0.035337982	0	0	1	79
GO:0006073 cellular glucan metabolic process	1	0.023516671	16.667	0.013	Biological Process	GO:0006073	cellular glucan metabolic process	0.023516671	0.035337982	0	0	1	79
GO:0007422 peripheral nervous system development	1	0.023516671	16.667	0.013	Biological Process	GO:0007422	peripheral nervous system development	0.023516671	0.035337982	0	0	1	79
GO:0010827 regulation of glucose transmembrane transport	1	0.023516671	16.667	0.013	Biological Process	GO:0010827	regulation of glucose transmembrane transport	0.023516671	0.035337982	0	0	1	79
GO:0016575 histone deacetylation	1	0.023516671	16.667	0.013	Biological Process	GO:0016575	histone deacetylation	0.023516671	0.035337982	0	0	1	79
GO:0042310 vasoconstriction	1	0.023516671	16.667	0.013	Biological Process	GO:0042310	vasoconstriction	0.023516671	0.035337982	0	0	1	79
GO:0042531 positive regulation of tyrosine phosphorylation of STAT protein	1	0.023516671	16.667	0.013	Biological Process	GO:0042531	positive regulation of tyrosine phosphorylation of STAT protein	0.023516671	0.035337982	0	0	1	79
GO:0044042 glucan metabolic process	1	0.023516671	16.667	0.013	Biological Process	GO:0044042	glucan metabolic process	0.023516671	0.035337982	0	0	1	79
GO:0051145 smooth muscle cell differentiation	1	0.023516671	16.667	0.013	Biological Process	GO:0051145	smooth muscle cell differentiation	0.023516671	0.035337982	0	0	1	79
GO:0071260 cellular response to mechanical stimulus	1	0.023516671	16.667	0.013	Biological Process	GO:0071260	cellular response to mechanical stimulus	0.023516671	0.035337982	0	0	1	79
GO:1902117 positive regulation of organelle assembly	1	0.023516671	16.667	0.013	Biological Process	GO:1902117	positive regulation of organelle assembly	0.023516671	0.035337982	0	0	1	79
GO:0008009 chemokine activity	1	0.019451688	16.667	0.015	Molecular Function	GO:0008009	chemokine activity	0.019451688	0.035452271	0	0	1	66
GO:1903530 regulation of secretion by cell	2	0.023701765	33.333	0.002	Biological Process	GO:1903530	regulation of secretion by cell	0.023701765	0.035588889	0	0	2	840
GO:0014032 neural crest cell development	1	0.02381137	16.667	0.013	Biological Process	GO:0014032	neural crest cell development	0.02381137	0.035671648	0	0	1	80
GO:0061333 renal tubule morphogenesis	1	0.02381137	16.667	0.013	Biological Process	GO:0061333	renal tubule morphogenesis	0.02381137	0.035671648	0	0	1	80
GO:0072028 nephron morphogenesis	1	0.02381137	16.667	0.013	Biological Process	GO:0072028	nephron morphogenesis	0.02381137	0.035671648	0	0	1	80
GO:0051345 positive regulation of hydrolase activity	2	0.023861734	33.333	0.002	Biological Process	GO:0051345	positive regulation of hydrolase activity	0.023861734	0.035719852	0	0	2	843
GO:0030855 epithelial cell differentiation	2	0.023968641	33.333	0.002	Biological Process	GO:0030855	epithelial cell differentiation	0.023968641	0.035825274	0	0	2	845
GO:0050801 ion homeostasis	2	0.023968641	33.333	0.002	Biological Process	GO:0050801	ion homeostasis	0.023968641	0.035825274	0	0	2	845
GO:0033143 regulation of intracellular steroid hormone receptor signaling pathway	1	0.024105994	16.667	0.012	Biological Process	GO:0033143	regulation of intracellular steroid hormone receptor signaling pathway	0.024105994	0.036003173	0	0	1	81
GO:0002757 immune response-activating signal transduction	2	0.024129392	33.333	0.002	Biological Process	GO:0002757	immune response-activating signal transduction	0.024129392	0.036010734	0	0	2	848
GO:0014855 striated muscle cell proliferation	1	0.024400544	16.667	0.012	Biological Process	GO:0014855	striated muscle cell proliferation	0.024400544	0.036332577	0	0	1	82
GO:0045685 regulation of glial cell differentiation	1	0.024400544	16.667	0.012	Biological Process	GO:0045685	regulation of glial cell differentiation	0.024400544	0.036332577	0	0	1	82
GO:0061900 glial cell activation	1	0.024400544	16.667	0.012	Biological Process	GO:0061900	glial cell activation	0.024400544	0.036332577	0	0	1	82
GO:0014031 mesenchymal cell development	1	0.024989423	16.667	0.012	Biological Process	GO:0014031	mesenchymal cell development	0.024989423	0.037124982	0	0	1	84
GO:0043030 regulation of macrophage activation	1	0.024989423	16.667	0.012	Biological Process	GO:0043030	regulation of macrophage activation	0.024989423	0.037124982	0	0	1	84
GO:0060420 regulation of heart growth	1	0.024989423	16.667	0.012	Biological Process	GO:0060420	regulation of heart growth	0.024989423	0.037124982	0	0	1	84
GO:0071840 cellular component organization or biogenesis	5	0.025094974	83.333	0.001	Biological Process	GO:0071840	cellular component organization or biogenesis	0.025094974	0.037253613	0	0	5	7168
GO:0006809 nitric oxide biosynthetic process	1	0.025283751	16.667	0.012	Biological Process	GO:0006809	nitric oxide biosynthetic process	0.025283751	0.037420713	0	0	1	85
GO:0048864 stem cell development	1	0.025283751	16.667	0.012	Biological Process	GO:0048864	stem cell development	0.025283751	0.037420713	0	0	1	85
GO:0090049 regulation of cell migration involved in sprouting angiogenesis	1	0.025283751	16.667	0.012	Biological Process	GO:0090049	regulation of cell migration involved in sprouting angiogenesis	0.025283751	0.037420713	0	0	1	85
GO:0110110 positive regulation of animal organ morphogenesis	1	0.025283751	16.667	0.012	Biological Process	GO:0110110	positive regulation of animal organ morphogenesis	0.025283751	0.037420713	0	0	1	85
GO:0051649 establishment of localization in cell	3	0.025308203	50	0.001	Biological Process	GO:0051649	establishment of localization in cell	0.025308203	0.037428697	0	0	3	2369
GO:0042058 regulation of epidermal growth factor receptor signaling pathway	1	0.025578005	16.667	0.012	Biological Process	GO:0042058	regulation of epidermal growth factor receptor signaling pathway	0.025578005	0.037714115	0	0	1	86
GO:0046889 positive regulation of lipid biosynthetic process	1	0.025578005	16.667	0.012	Biological Process	GO:0046889	positive regulation of lipid biosynthetic process	0.025578005	0.037714115	0	0	1	86
GO:0061844 antimicrobial humoral immune response mediated by antimicrobial peptide	1	0.025578005	16.667	0.012	Biological Process	GO:0061844	antimicrobial humoral immune response mediated by antimicrobial peptide	0.025578005	0.037714115	0	0	1	86
GO:0097581 lamellipodium organization	1	0.025578005	16.667	0.012	Biological Process	GO:0097581	lamellipodium organization	0.025578005	0.037714115	0	0	1	86
GO:0044456 synapse part	3	0.00188844	50	0.003	Cellular Component	GO:0044456	synapse part	0.00188844	0.037873048	0	0	3	1004
GO:0005770 late endosome	2	0.002541003	33.333	0.007	Cellular Component	GO:0005770	late endosome	0.002541003	0.037873048	0	0	2	282
GO:0045121 membrane raft	2	0.003543147	33.333	0.006	Cellular Component	GO:0045121	membrane raft	0.003543147	0.037873048	0	0	2	334
GO:0098857 membrane microdomain	2	0.003563977	33.333	0.006	Cellular Component	GO:0098857	membrane microdomain	0.003563977	0.037873048	0	0	2	335
GO:0045202 synapse	3	0.003697913	50	0.002	Cellular Component	GO:0045202	synapse	0.003697913	0.037873048	0	0	3	1268
GO:0014069 postsynaptic density	2	0.003796954	33.333	0.006	Cellular Component	GO:0014069	postsynaptic density	0.003796954	0.037873048	0	0	2	346
GO:0098589 membrane region	2	0.003818482	33.333	0.006	Cellular Component	GO:0098589	membrane region	0.003818482	0.037873048	0	0	2	347
GO:0005576 extracellular region	5	0.003834035	83.333	0.001	Cellular Component	GO:0005576	extracellular region	0.003834035	0.037873048	0	0	5	5105
GO:0032279 asymmetric synapse	2	0.003883417	33.333	0.006	Cellular Component	GO:0032279	asymmetric synapse	0.003883417	0.037873048	0	0	2	350
GO:0005819 spindle	2	0.004170828	33.333	0.006	Cellular Component	GO:0005819	spindle	0.004170828	0.037873048	0	0	2	363
GO:0034774 secretory granule lumen	2	0.004261227	33.333	0.005	Cellular Component	GO:0034774	secretory granule lumen	0.004261227	0.037873048	0	0	2	367
GO:0098984 neuron to neuron synapse	2	0.004375523	33.333	0.005	Cellular Component	GO:0098984	neuron to neuron synapse	0.004375523	0.037873048	0	0	2	372
GO:0099572 postsynaptic specialization	2	0.004375523	33.333	0.005	Cellular Component	GO:0099572	postsynaptic specialization	0.004375523	0.037873048	0	0	2	372
GO:0060205 cytoplasmic vesicle lumen	2	0.004679412	33.333	0.005	Cellular Component	GO:0060205	cytoplasmic vesicle lumen	0.004679412	0.037873048	0	0	2	385
GO:0031983 vesicle lumen	2	0.004703189	33.333	0.005	Cellular Component	GO:0031983	vesicle lumen	0.004703189	0.037873048	0	0	2	386
GO:0002028 regulation of sodium ion transport	1	0.025872185	16.667	0.011	Biological Process	GO:0002028	regulation of sodium ion transport	0.025872185	0.038005213	0	0	1	87
GO:0010507 negative regulation of autophagy	1	0.025872185	16.667	0.011	Biological Process	GO:0010507	negative regulation of autophagy	0.025872185	0.038005213	0	0	1	87
GO:0031397 negative regulation of protein ubiquitination	1	0.025872185	16.667	0.011	Biological Process	GO:0031397	negative regulation of protein ubiquitination	0.025872185	0.038005213	0	0	1	87
GO:0034637 cellular carbohydrate biosynthetic process	1	0.025872185	16.667	0.011	Biological Process	GO:0034637	cellular carbohydrate biosynthetic process	0.025872185	0.038005213	0	0	1	87
GO:0050772 positive regulation of axonogenesis	1	0.025872185	16.667	0.011	Biological Process	GO:0050772	positive regulation of axonogenesis	0.025872185	0.038005213	0	0	1	87
GO:0001817 regulation of cytokine production	2	0.025983844	33.333	0.002	Biological Process	GO:0001817	regulation of cytokine production	0.025983844	0.03814071	0	0	2	882
GO:0014910 regulation of smooth muscle cell migration	1	0.02616629	16.667	0.011	Biological Process	GO:0014910	regulation of smooth muscle cell migration	0.02616629	0.038294035	0	0	1	88
GO:0038034 signal transduction in absence of ligand	1	0.02616629	16.667	0.011	Biological Process	GO:0038034	signal transduction in absence of ligand	0.02616629	0.038294035	0	0	1	88
GO:0097192 extrinsic apoptotic signaling pathway in absence of ligand	1	0.02616629	16.667	0.011	Biological Process	GO:0097192	extrinsic apoptotic signaling pathway in absence of ligand	0.02616629	0.038294035	0	0	1	88
GO:0097756 negative regulation of blood vessel diameter	1	0.02616629	16.667	0.011	Biological Process	GO:0097756	negative regulation of blood vessel diameter	0.02616629	0.038294035	0	0	1	88
GO:0046209 nitric oxide metabolic process	1	0.026460322	16.667	0.011	Biological Process	GO:0046209	nitric oxide metabolic process	0.026460322	0.038666721	0	0	1	89
GO:0097194 execution phase of apoptosis	1	0.026460322	16.667	0.011	Biological Process	GO:0097194	execution phase of apoptosis	0.026460322	0.038666721	0	0	1	89
GO:0031143 pseudopodium	1	0.00507196	16.667	0.056	Cellular Component	GO:0031143	pseudopodium	0.00507196	0.038800492	0	0	1	18
GO:0003008 system process	3	0.026691689	50	0.001	Biological Process	GO:0003008	system process	0.026691689	0.038922523	0	0	3	2416
GO:0002548 monocyte chemotaxis	1	0.02675428	16.667	0.011	Biological Process	GO:0002548	monocyte chemotaxis	0.02675428	0.038922523	0	0	1	90
GO:0014033 neural crest cell differentiation	1	0.02675428	16.667	0.011	Biological Process	GO:0014033	neural crest cell differentiation	0.02675428	0.038922523	0	0	1	90
GO:0042509 regulation of tyrosine phosphorylation of STAT protein	1	0.02675428	16.667	0.011	Biological Process	GO:0042509	regulation of tyrosine phosphorylation of STAT protein	0.02675428	0.038922523	0	0	1	90
GO:0048013 ephrin receptor signaling pathway	1	0.02675428	16.667	0.011	Biological Process	GO:0048013	ephrin receptor signaling pathway	0.02675428	0.038922523	0	0	1	90
GO:0051781 positive regulation of cell division	1	0.02675428	16.667	0.011	Biological Process	GO:0051781	positive regulation of cell division	0.02675428	0.038922523	0	0	1	90
GO:0002764 immune response-regulating signaling pathway	2	0.026989659	33.333	0.002	Biological Process	GO:0002764	immune response-regulating signaling pathway	0.026989659	0.039147085	0	0	2	900
GO:0019953 sexual reproduction	2	0.026989659	33.333	0.002	Biological Process	GO:0019953	sexual reproduction	0.026989659	0.039147085	0	0	2	900
GO:0034641 cellular nitrogen compound metabolic process	5	0.027004986	83.333	0.001	Biological Process	GO:0034641	cellular nitrogen compound metabolic process	0.027004986	0.039147085	0	0	5	7284
GO:0045055 regulated exocytosis	2	0.027046021	33.333	0.002	Biological Process	GO:0045055	regulated exocytosis	0.027046021	0.039147085	0	0	2	901
GO:0051046 regulation of secretion	2	0.027046021	33.333	0.002	Biological Process	GO:0051046	regulation of secretion	0.027046021	0.039147085	0	0	2	901
GO:0006112 energy reserve metabolic process	1	0.027048164	16.667	0.011	Biological Process	GO:0006112	energy reserve metabolic process	0.027048164	0.039147085	0	0	1	91
GO:0034446 substrate adhesion-dependent cell spreading	1	0.027048164	16.667	0.011	Biological Process	GO:0034446	substrate adhesion-dependent cell spreading	0.027048164	0.039147085	0	0	1	91
GO:0007260 tyrosine phosphorylation of STAT protein	1	0.027341974	16.667	0.011	Biological Process	GO:0007260	tyrosine phosphorylation of STAT protein	0.027341974	0.039340394	0	0	1	92
GO:0022617 extracellular matrix disassembly	1	0.027341974	16.667	0.011	Biological Process	GO:0022617	extracellular matrix disassembly	0.027341974	0.039340394	0	0	1	92
GO:0031058 positive regulation of histone modification	1	0.027341974	16.667	0.011	Biological Process	GO:0031058	positive regulation of histone modification	0.027341974	0.039340394	0	0	1	92
GO:0032436 positive regulation of proteasomal ubiquitin-dependent protein catabolic process	1	0.027341974	16.667	0.011	Biological Process	GO:0032436	positive regulation of proteasomal ubiquitin-dependent protein catabolic process	0.027341974	0.039340394	0	0	1	92
GO:0045778 positive regulation of ossification	1	0.027341974	16.667	0.011	Biological Process	GO:0045778	positive regulation of ossification	0.027341974	0.039340394	0	0	1	92
GO:0051899 membrane depolarization	1	0.027341974	16.667	0.011	Biological Process	GO:0051899	membrane depolarization	0.027341974	0.039340394	0	0	1	92
GO:0055013 cardiac muscle cell development	1	0.027341974	16.667	0.011	Biological Process	GO:0055013	cardiac muscle cell development	0.027341974	0.039340394	0	0	1	92
GO:2001057 reactive nitrogen species metabolic process	1	0.027341974	16.667	0.011	Biological Process	GO:2001057	reactive nitrogen species metabolic process	0.027341974	0.039340394	0	0	1	92
GO:0009791 post-embryonic development	1	0.02763571	16.667	0.011	Biological Process	GO:0009791	post-embryonic development	0.02763571	0.039531344	0	0	1	93
GO:0014015 positive regulation of gliogenesis	1	0.02763571	16.667	0.011	Biological Process	GO:0014015	positive regulation of gliogenesis	0.02763571	0.039531344	0	0	1	93
GO:0019217 regulation of fatty acid metabolic process	1	0.02763571	16.667	0.011	Biological Process	GO:0019217	regulation of fatty acid metabolic process	0.02763571	0.039531344	0	0	1	93
GO:0045844 positive regulation of striated muscle tissue development	1	0.02763571	16.667	0.011	Biological Process	GO:0045844	positive regulation of striated muscle tissue development	0.02763571	0.039531344	0	0	1	93
GO:0048636 positive regulation of muscle organ development	1	0.02763571	16.667	0.011	Biological Process	GO:0048636	positive regulation of muscle organ development	0.02763571	0.039531344	0	0	1	93
GO:1901184 regulation of ERBB signaling pathway	1	0.02763571	16.667	0.011	Biological Process	GO:1901184	regulation of ERBB signaling pathway	0.02763571	0.039531344	0	0	1	93
GO:1903725 regulation of phospholipid metabolic process	1	0.02763571	16.667	0.011	Biological Process	GO:1903725	regulation of phospholipid metabolic process	0.02763571	0.039531344	0	0	1	93
GO:2000177 regulation of neural precursor cell proliferation	1	0.02763571	16.667	0.011	Biological Process	GO:2000177	regulation of neural precursor cell proliferation	0.02763571	0.039531344	0	0	1	93
GO:0002720 positive regulation of cytokine production involved in immune response	1	0.027929372	16.667	0.011	Biological Process	GO:0002720	positive regulation of cytokine production involved in immune response	0.027929372	0.039777583	0	0	1	94
GO:0010717 regulation of epithelial to mesenchymal transition	1	0.027929372	16.667	0.011	Biological Process	GO:0010717	regulation of epithelial to mesenchymal transition	0.027929372	0.039777583	0	0	1	94
GO:0045833 negative regulation of lipid metabolic process	1	0.027929372	16.667	0.011	Biological Process	GO:0045833	negative regulation of lipid metabolic process	0.027929372	0.039777583	0	0	1	94
GO:0048477 oogenesis	1	0.027929372	16.667	0.011	Biological Process	GO:0048477	oogenesis	0.027929372	0.039777583	0	0	1	94
GO:1901863 positive regulation of muscle tissue development	1	0.027929372	16.667	0.011	Biological Process	GO:1901863	positive regulation of muscle tissue development	0.027929372	0.039777583	0	0	1	94
GO:1901992 positive regulation of mitotic cell cycle phase transition	1	0.027929372	16.667	0.011	Biological Process	GO:1901992	positive regulation of mitotic cell cycle phase transition	0.027929372	0.039777583	0	0	1	94
GO:0014068 positive regulation of phosphatidylinositol 3-kinase signaling	1	0.028222961	16.667	0.011	Biological Process	GO:0014068	positive regulation of phosphatidylinositol 3-kinase signaling	0.028222961	0.040050502	0	0	1	95
GO:0030516 regulation of axon extension	1	0.028222961	16.667	0.011	Biological Process	GO:0030516	regulation of axon extension	0.028222961	0.040050502	0	0	1	95
GO:0051651 maintenance of location in cell	1	0.028222961	16.667	0.011	Biological Process	GO:0051651	maintenance of location in cell	0.028222961	0.040050502	0	0	1	95
GO:0097306 cellular response to alcohol	1	0.028222961	16.667	0.011	Biological Process	GO:0097306	cellular response to alcohol	0.028222961	0.040050502	0	0	1	95
GO:1900407 regulation of cellular response to oxidative stress	1	0.028222961	16.667	0.011	Biological Process	GO:1900407	regulation of cellular response to oxidative stress	0.028222961	0.040050502	0	0	1	95
GO:0006476 protein deacetylation	1	0.028516475	16.667	0.01	Biological Process	GO:0006476	protein deacetylation	0.028516475	0.040379493	0	0	1	96
GO:0072080 nephron tubule development	1	0.028516475	16.667	0.01	Biological Process	GO:0072080	nephron tubule development	0.028516475	0.040379493	0	0	1	96
GO:1900034 regulation of cellular response to heat	1	0.028516475	16.667	0.01	Biological Process	GO:1900034	regulation of cellular response to heat	0.028516475	0.040379493	0	0	1	96
GO:0036473 cell death in response to oxidative stress	1	0.028809915	16.667	0.01	Biological Process	GO:0036473	cell death in response to oxidative stress	0.028809915	0.040561057	0	0	1	97
GO:0043255 regulation of carbohydrate biosynthetic process	1	0.028809915	16.667	0.01	Biological Process	GO:0043255	regulation of carbohydrate biosynthetic process	0.028809915	0.040561057	0	0	1	97
GO:0044070 regulation of anion transport	1	0.028809915	16.667	0.01	Biological Process	GO:0044070	regulation of anion transport	0.028809915	0.040561057	0	0	1	97
GO:0060993 kidney morphogenesis	1	0.028809915	16.667	0.01	Biological Process	GO:0060993	kidney morphogenesis	0.028809915	0.040561057	0	0	1	97
GO:0061097 regulation of protein tyrosine kinase activity	1	0.028809915	16.667	0.01	Biological Process	GO:0061097	regulation of protein tyrosine kinase activity	0.028809915	0.040561057	0	0	1	97
GO:0061418 regulation of transcription from RNA polymerase II promoter in response to hypoxia	1	0.028809915	16.667	0.01	Biological Process	GO:0061418	regulation of transcription from RNA polymerase II promoter in response to hypoxia	0.028809915	0.040561057	0	0	1	97
GO:0150076 neuroinflammatory response	1	0.028809915	16.667	0.01	Biological Process	GO:0150076	neuroinflammatory response	0.028809915	0.040561057	0	0	1	97
GO:1903321 negative regulation of protein modification by small protein conjugation or removal	1	0.028809915	16.667	0.01	Biological Process	GO:1903321	negative regulation of protein modification by small protein conjugation or removal	0.028809915	0.040561057	0	0	1	97
GO:0002709 regulation of T cell mediated immunity	1	0.029103282	16.667	0.01	Biological Process	GO:0002709	regulation of T cell mediated immunity	0.029103282	0.040856931	0	0	1	98
GO:0046427 positive regulation of JAK-STAT cascade	1	0.029103282	16.667	0.01	Biological Process	GO:0046427	positive regulation of JAK-STAT cascade	0.029103282	0.040856931	0	0	1	98
GO:0055006 cardiac cell development	1	0.029103282	16.667	0.01	Biological Process	GO:0055006	cardiac cell development	0.029103282	0.040856931	0	0	1	98
GO:0060291 long-term synaptic potentiation	1	0.029103282	16.667	0.01	Biological Process	GO:0060291	long-term synaptic potentiation	0.029103282	0.040856931	0	0	1	98
GO:0001657 ureteric bud development	1	0.029396575	16.667	0.01	Biological Process	GO:0001657	ureteric bud development	0.029396575	0.041151014	0	0	1	99
GO:0014909 smooth muscle cell migration	1	0.029396575	16.667	0.01	Biological Process	GO:0014909	smooth muscle cell migration	0.029396575	0.041151014	0	0	1	99
GO:0030641 regulation of cellular pH	1	0.029396575	16.667	0.01	Biological Process	GO:0030641	regulation of cellular pH	0.029396575	0.041151014	0	0	1	99
GO:0061326 renal tubule development	1	0.029396575	16.667	0.01	Biological Process	GO:0061326	renal tubule development	0.029396575	0.041151014	0	0	1	99
GO:0006974 cellular response to DNA damage stimulus	2	0.029634526	33.333	0.002	Biological Process	GO:0006974	cellular response to DNA damage stimulus	0.029634526	0.041443323	0	0	2	946
GO:0060840 artery development	1	0.029689794	16.667	0.01	Biological Process	GO:0060840	artery development	0.029689794	0.041443323	0	0	1	100
GO:0072163 mesonephric epithelium development	1	0.029689794	16.667	0.01	Biological Process	GO:0072163	mesonephric epithelium development	0.029689794	0.041443323	0	0	1	100
GO:0072164 mesonephric tubule development	1	0.029689794	16.667	0.01	Biological Process	GO:0072164	mesonephric tubule development	0.029689794	0.041443323	0	0	1	100
GO:0099091 postsynaptic specialization, intracellular component	1	0.005915198	16.667	0.048	Cellular Component	GO:0099091	postsynaptic specialization, intracellular component	0.005915198	0.04153346	0	0	1	21
GO:0044463 cell projection part	3	0.006243592	50	0.002	Cellular Component	GO:0044463	cell projection part	0.006243592	0.04153346	0	0	3	1524
GO:0120038 plasma membrane bounded cell projection part	3	0.006243592	50	0.002	Cellular Component	GO:0120038	plasma membrane bounded cell projection part	0.006243592	0.04153346	0	0	3	1524
GO:0002253 activation of immune response	2	0.029869518	33.333	0.002	Biological Process	GO:0002253	activation of immune response	0.029869518	0.041664583	0	0	2	950
GO:0035591 signaling adaptor activity	1	0.02324566	16.667	0.013	Molecular Function	GO:0035591	signaling adaptor activity	0.02324566	0.041694596	0	0	1	79
GO:0015908 fatty acid transport	1	0.029982939	16.667	0.01	Biological Process	GO:0015908	fatty acid transport	0.029982939	0.041704314	0	0	1	101
GO:0032642 regulation of chemokine production	1	0.029982939	16.667	0.01	Biological Process	GO:0032642	regulation of chemokine production	0.029982939	0.041704314	0	0	1	101
GO:0055024 regulation of cardiac muscle tissue development	1	0.029982939	16.667	0.01	Biological Process	GO:0055024	regulation of cardiac muscle tissue development	0.029982939	0.041704314	0	0	1	101
GO:1904894 positive regulation of STAT cascade	1	0.029982939	16.667	0.01	Biological Process	GO:1904894	positive regulation of STAT cascade	0.029982939	0.041704314	0	0	1	101
GO:0000166 nucleotide binding	3	0.024432831	50	0.001	Molecular Function	GO:0000166	nucleotide binding	0.024432831	0.04188001	0	0	3	2366
GO:0019899 enzyme binding	3	0.024460891	50	0.001	Molecular Function	GO:0019899	enzyme binding	0.024460891	0.04188001	0	0	3	2367
GO:1901265 nucleoside phosphate binding	3	0.024460891	50	0.001	Molecular Function	GO:1901265	nucleoside phosphate binding	0.024460891	0.04188001	0	0	3	2367
GO:0001816 cytokine production	2	0.030223492	33.333	0.002	Biological Process	GO:0001816	cytokine production	0.030223492	0.042009157	0	0	2	956
GO:0007589 body fluid secretion	1	0.03027601	16.667	0.01	Biological Process	GO:0007589	body fluid secretion	0.03027601	0.042022674	0	0	1	102
GO:0046632 alpha-beta T cell differentiation	1	0.03027601	16.667	0.01	Biological Process	GO:0046632	alpha-beta T cell differentiation	0.03027601	0.042022674	0	0	1	102
GO:0019395 fatty acid oxidation	1	0.030569008	16.667	0.01	Biological Process	GO:0019395	fatty acid oxidation	0.030569008	0.042399386	0	0	1	103
GO:0001823 mesonephros development	1	0.030861931	16.667	0.01	Biological Process	GO:0001823	mesonephros development	0.030861931	0.042715175	0	0	1	104
GO:0034766 negative regulation of ion transmembrane transport	1	0.030861931	16.667	0.01	Biological Process	GO:0034766	negative regulation of ion transmembrane transport	0.030861931	0.042715175	0	0	1	104
GO:0044264 cellular polysaccharide metabolic process	1	0.030861931	16.667	0.01	Biological Process	GO:0044264	cellular polysaccharide metabolic process	0.030861931	0.042715175	0	0	1	104
GO:0032091 negative regulation of protein binding	1	0.031154781	16.667	0.01	Biological Process	GO:0032091	negative regulation of protein binding	0.031154781	0.04287876	0	0	1	105
GO:0034440 lipid oxidation	1	0.031154781	16.667	0.01	Biological Process	GO:0034440	lipid oxidation	0.031154781	0.04287876	0	0	1	105
GO:0035710 CD4-positive, alpha-beta T cell activation	1	0.031154781	16.667	0.01	Biological Process	GO:0035710	CD4-positive, alpha-beta T cell activation	0.031154781	0.04287876	0	0	1	105
GO:0055017 cardiac muscle tissue growth	1	0.031154781	16.667	0.01	Biological Process	GO:0055017	cardiac muscle tissue growth	0.031154781	0.04287876	0	0	1	105
GO:0062014 negative regulation of small molecule metabolic process	1	0.031154781	16.667	0.01	Biological Process	GO:0062014	negative regulation of small molecule metabolic process	0.031154781	0.04287876	0	0	1	105
GO:0070098 chemokine-mediated signaling pathway	1	0.031154781	16.667	0.01	Biological Process	GO:0070098	chemokine-mediated signaling pathway	0.031154781	0.04287876	0	0	1	105
GO:1902882 regulation of response to oxidative stress	1	0.031154781	16.667	0.01	Biological Process	GO:1902882	regulation of response to oxidative stress	0.031154781	0.04287876	0	0	1	105
GO:1905269 positive regulation of chromatin organization	1	0.031154781	16.667	0.01	Biological Process	GO:1905269	positive regulation of chromatin organization	0.031154781	0.04287876	0	0	1	105
GO:0019222 regulation of metabolic process	5	0.031414547	83.333	0.001	Biological Process	GO:0019222	regulation of metabolic process	0.031414547	0.043160729	0	0	5	7530
GO:0035601 protein deacylation	1	0.031447557	16.667	0.009	Biological Process	GO:0035601	protein deacylation	0.031447557	0.043160729	0	0	1	106
GO:0045069 regulation of viral genome replication	1	0.031447557	16.667	0.009	Biological Process	GO:0045069	regulation of viral genome replication	0.031447557	0.043160729	0	0	1	106
GO:1903076 regulation of protein localization to plasma membrane	1	0.031447557	16.667	0.009	Biological Process	GO:1903076	regulation of protein localization to plasma membrane	0.031447557	0.043160729	0	0	1	106
GO:0006885 regulation of pH	1	0.03174026	16.667	0.009	Biological Process	GO:0006885	regulation of pH	0.03174026	0.043380564	0	0	1	107
GO:0008593 regulation of Notch signaling pathway	1	0.03174026	16.667	0.009	Biological Process	GO:0008593	regulation of Notch signaling pathway	0.03174026	0.043380564	0	0	1	107
GO:0019233 sensory perception of pain	1	0.03174026	16.667	0.009	Biological Process	GO:0019233	sensory perception of pain	0.03174026	0.043380564	0	0	1	107
GO:0030038 contractile actin filament bundle assembly	1	0.03174026	16.667	0.009	Biological Process	GO:0030038	contractile actin filament bundle assembly	0.03174026	0.043380564	0	0	1	107
GO:0043149 stress fiber assembly	1	0.03174026	16.667	0.009	Biological Process	GO:0043149	stress fiber assembly	0.03174026	0.043380564	0	0	1	107
GO:2000060 positive regulation of ubiquitin-dependent protein catabolic process	1	0.03174026	16.667	0.009	Biological Process	GO:2000060	positive regulation of ubiquitin-dependent protein catabolic process	0.03174026	0.043380564	0	0	1	107
GO:0032602 chemokine production	1	0.032032889	16.667	0.009	Biological Process	GO:0032602	chemokine production	0.032032889	0.043658982	0	0	1	108
GO:0120162 positive regulation of cold-induced thermogenesis	1	0.032032889	16.667	0.009	Biological Process	GO:0120162	positive regulation of cold-induced thermogenesis	0.032032889	0.043658982	0	0	1	108
GO:1903426 regulation of reactive oxygen species biosynthetic process	1	0.032032889	16.667	0.009	Biological Process	GO:1903426	regulation of reactive oxygen species biosynthetic process	0.032032889	0.043658982	0	0	1	108
GO:1904035 regulation of epithelial cell apoptotic process	1	0.032032889	16.667	0.009	Biological Process	GO:1904035	regulation of epithelial cell apoptotic process	0.032032889	0.043658982	0	0	1	108
GO:0140096 catalytic activity, acting on a protein	3	0.026267102	50	0.001	Molecular Function	GO:0140096	catalytic activity, acting on a protein	0.026267102	0.043691915	0	0	3	2430
GO:0042803 protein homodimerization activity	2	0.02629248	33.333	0.002	Molecular Function	GO:0042803	protein homodimerization activity	0.02629248	0.043691915	0	0	2	898
GO:0021510 spinal cord development	1	0.032325444	16.667	0.009	Biological Process	GO:0021510	spinal cord development	0.032325444	0.043905374	0	0	1	109
GO:0048259 regulation of receptor-mediated endocytosis	1	0.032325444	16.667	0.009	Biological Process	GO:0048259	regulation of receptor-mediated endocytosis	0.032325444	0.043905374	0	0	1	109
GO:0060079 excitatory postsynaptic potential	1	0.032325444	16.667	0.009	Biological Process	GO:0060079	excitatory postsynaptic potential	0.032325444	0.043905374	0	0	1	109
GO:0072527 pyrimidine-containing compound metabolic process	1	0.032325444	16.667	0.009	Biological Process	GO:0072527	pyrimidine-containing compound metabolic process	0.032325444	0.043905374	0	0	1	109
GO:1904659 glucose transmembrane transport	1	0.032325444	16.667	0.009	Biological Process	GO:1904659	glucose transmembrane transport	0.032325444	0.043905374	0	0	1	109
GO:0007009 plasma membrane organization	1	0.032617925	16.667	0.009	Biological Process	GO:0007009	plasma membrane organization	0.032617925	0.044180417	0	0	1	110
GO:0061387 regulation of extent of cell growth	1	0.032617925	16.667	0.009	Biological Process	GO:0061387	regulation of extent of cell growth	0.032617925	0.044180417	0	0	1	110
GO:1901989 positive regulation of cell cycle phase transition	1	0.032617925	16.667	0.009	Biological Process	GO:1901989	positive regulation of cell cycle phase transition	0.032617925	0.044180417	0	0	1	110
GO:2000379 positive regulation of reactive oxygen species metabolic process	1	0.032617925	16.667	0.009	Biological Process	GO:2000379	positive regulation of reactive oxygen species metabolic process	0.032617925	0.044180417	0	0	1	110
GO:0042379 chemokine receptor binding	1	0.027027391	16.667	0.011	Molecular Function	GO:0042379	chemokine receptor binding	0.027027391	0.044262248	0	0	1	92
GO:0002286 T cell activation involved in immune response	1	0.032910333	16.667	0.009	Biological Process	GO:0002286	T cell activation involved in immune response	0.032910333	0.044515078	0	0	1	111
GO:0046822 regulation of nucleocytoplasmic transport	1	0.032910333	16.667	0.009	Biological Process	GO:0046822	regulation of nucleocytoplasmic transport	0.032910333	0.044515078	0	0	1	111
GO:0014812 muscle cell migration	1	0.033202667	16.667	0.009	Biological Process	GO:0014812	muscle cell migration	0.033202667	0.044817895	0	0	1	112
GO:0060419 heart growth	1	0.033202667	16.667	0.009	Biological Process	GO:0060419	heart growth	0.033202667	0.044817895	0	0	1	112
GO:0072009 nephron epithelium development	1	0.033202667	16.667	0.009	Biological Process	GO:0072009	nephron epithelium development	0.033202667	0.044817895	0	0	1	112
GO:1903510 mucopolysaccharide metabolic process	1	0.033787114	16.667	0.009	Biological Process	GO:1903510	mucopolysaccharide metabolic process	0.033787114	0.045512957	0	0	1	114
GO:1990868 response to chemokine	1	0.033787114	16.667	0.009	Biological Process	GO:1990868	response to chemokine	0.033787114	0.045512957	0	0	1	114
GO:1990869 cellular response to chemokine	1	0.033787114	16.667	0.009	Biological Process	GO:1990869	cellular response to chemokine	0.033787114	0.045512957	0	0	1	114
GO:0044087 regulation of cellular component biogenesis	2	0.033984521	33.333	0.002	Biological Process	GO:0044087	regulation of cellular component biogenesis	0.033984521	0.045747498	0	0	2	1018
GO:0008645 hexose transmembrane transport	1	0.034079227	16.667	0.009	Biological Process	GO:0008645	hexose transmembrane transport	0.034079227	0.045780849	0	0	1	115
GO:0045185 maintenance of protein location	1	0.034079227	16.667	0.009	Biological Process	GO:0045185	maintenance of protein location	0.034079227	0.045780849	0	0	1	115
GO:0050829 defense response to Gram-negative bacterium	1	0.034079227	16.667	0.009	Biological Process	GO:0050829	defense response to Gram-negative bacterium	0.034079227	0.045780849	0	0	1	115
GO:0035258 steroid hormone receptor binding	1	0.02847865	16.667	0.01	Molecular Function	GO:0035258	steroid hormone receptor binding	0.02847865	0.045972677	0	0	1	97
GO:0006887 exocytosis	2	0.03429594	33.333	0.002	Biological Process	GO:0006887	exocytosis	0.03429594	0.046040483	0	0	2	1023
GO:0005976 polysaccharide metabolic process	1	0.034371266	16.667	0.009	Biological Process	GO:0005976	polysaccharide metabolic process	0.034371266	0.046047181	0	0	1	116
GO:0007229 integrin-mediated signaling pathway	1	0.034371266	16.667	0.009	Biological Process	GO:0007229	integrin-mediated signaling pathway	0.034371266	0.046047181	0	0	1	116
GO:0048593 camera-type eye morphogenesis	1	0.034371266	16.667	0.009	Biological Process	GO:0048593	camera-type eye morphogenesis	0.034371266	0.046047181	0	0	1	116
GO:0019725 cellular homeostasis	2	0.034545937	33.333	0.002	Biological Process	GO:0019725	cellular homeostasis	0.034545937	0.046186288	0	0	2	1027
GO:0008543 fibroblast growth factor receptor signaling pathway	1	0.034663232	16.667	0.009	Biological Process	GO:0008543	fibroblast growth factor receptor signaling pathway	0.034663232	0.046186288	0	0	1	117
GO:0009062 fatty acid catabolic process	1	0.034663232	16.667	0.009	Biological Process	GO:0009062	fatty acid catabolic process	0.034663232	0.046186288	0	0	1	117
GO:0015749 monosaccharide transmembrane transport	1	0.034663232	16.667	0.009	Biological Process	GO:0015749	monosaccharide transmembrane transport	0.034663232	0.046186288	0	0	1	117
GO:0030004 cellular monovalent inorganic cation homeostasis	1	0.034663232	16.667	0.009	Biological Process	GO:0030004	cellular monovalent inorganic cation homeostasis	0.034663232	0.046186288	0	0	1	117
GO:0051341 regulation of oxidoreductase activity	1	0.034663232	16.667	0.009	Biological Process	GO:0051341	regulation of oxidoreductase activity	0.034663232	0.046186288	0	0	1	117
GO:0098732 macromolecule deacylation	1	0.034663232	16.667	0.009	Biological Process	GO:0098732	macromolecule deacylation	0.034663232	0.046186288	0	0	1	117
GO:0099565 chemical synaptic transmission, postsynaptic	1	0.034663232	16.667	0.009	Biological Process	GO:0099565	chemical synaptic transmission, postsynaptic	0.034663232	0.046186288	0	0	1	117
GO:0034219 carbohydrate transmembrane transport	1	0.035246944	16.667	0.008	Biological Process	GO:0034219	carbohydrate transmembrane transport	0.035246944	0.046932202	0	0	1	119
GO:1901564 organonitrogen compound metabolic process	5	0.0354205	83.333	0.001	Biological Process	GO:1901564	organonitrogen compound metabolic process	0.0354205	0.047131343	0	0	5	7732
GO:0010811 positive regulation of cell-substrate adhesion	1	0.035538689	16.667	0.008	Biological Process	GO:0010811	positive regulation of cell-substrate adhesion	0.035538689	0.047224618	0	0	1	120
GO:0070498 interleukin-1-mediated signaling pathway	1	0.035538689	16.667	0.008	Biological Process	GO:0070498	interleukin-1-mediated signaling pathway	0.035538689	0.047224618	0	0	1	120
GO:0030316 osteoclast differentiation	1	0.035830361	16.667	0.008	Biological Process	GO:0030316	osteoclast differentiation	0.035830361	0.04748369	0	0	1	121
GO:0030593 neutrophil chemotaxis	1	0.035830361	16.667	0.008	Biological Process	GO:0030593	neutrophil chemotaxis	0.035830361	0.04748369	0	0	1	121
GO:0032755 positive regulation of interleukin-6 production	1	0.035830361	16.667	0.008	Biological Process	GO:0032755	positive regulation of interleukin-6 production	0.035830361	0.04748369	0	0	1	121
GO:0048675 axon extension	1	0.035830361	16.667	0.008	Biological Process	GO:0048675	axon extension	0.035830361	0.04748369	0	0	1	121
GO:0042136 neurotransmitter biosynthetic process	1	0.036121959	16.667	0.008	Biological Process	GO:0042136	neurotransmitter biosynthetic process	0.036121959	0.047837847	0	0	1	122
GO:0002824 positive regulation of adaptive immune response based on somatic recombination of immune receptors built from immunoglobulin superfamily domains	1	0.036413484	16.667	0.008	Biological Process	GO:0002824	positive regulation of adaptive immune response based on somatic recombination of immune receptors built from immunoglobulin superfamily domains	0.036413484	0.048094204	0	0	1	123
GO:0032963 collagen metabolic process	1	0.036413484	16.667	0.008	Biological Process	GO:0032963	collagen metabolic process	0.036413484	0.048094204	0	0	1	123
GO:0042116 macrophage activation	1	0.036413484	16.667	0.008	Biological Process	GO:0042116	macrophage activation	0.036413484	0.048094204	0	0	1	123
GO:0072089 stem cell proliferation	1	0.036413484	16.667	0.008	Biological Process	GO:0072089	stem cell proliferation	0.036413484	0.048094204	0	0	1	123
GO:0016740 transferase activity	3	0.030235155	50	0.001	Molecular Function	GO:0016740	transferase activity	0.030235155	0.048120739	0	0	3	2560
GO:0022612 gland morphogenesis	1	0.036704935	16.667	0.008	Biological Process	GO:0022612	gland morphogenesis	0.036704935	0.048381538	0	0	1	124
GO:0030968 endoplasmic reticulum unfolded protein response	1	0.036704935	16.667	0.008	Biological Process	GO:0030968	endoplasmic reticulum unfolded protein response	0.036704935	0.048381538	0	0	1	124
GO:1901800 positive regulation of proteasomal protein catabolic process	1	0.036704935	16.667	0.008	Biological Process	GO:1901800	positive regulation of proteasomal protein catabolic process	0.036704935	0.048381538	0	0	1	124
GO:0031929 TOR signaling	1	0.036996313	16.667	0.008	Biological Process	GO:0031929	TOR signaling	0.036996313	0.048635046	0	0	1	125
GO:0045667 regulation of osteoblast differentiation	1	0.036996313	16.667	0.008	Biological Process	GO:0045667	regulation of osteoblast differentiation	0.036996313	0.048635046	0	0	1	125
GO:0071674 mononuclear cell migration	1	0.036996313	16.667	0.008	Biological Process	GO:0071674	mononuclear cell migration	0.036996313	0.048635046	0	0	1	125
GO:1904375 regulation of protein localization to cell periphery	1	0.036996313	16.667	0.008	Biological Process	GO:1904375	regulation of protein localization to cell periphery	0.036996313	0.048635046	0	0	1	125
GO:0042471 ear morphogenesis	1	0.037578848	16.667	0.008	Biological Process	GO:0042471	ear morphogenesis	0.037578848	0.049334798	0	0	1	127
GO:0050830 defense response to Gram-positive bacterium	1	0.037578848	16.667	0.008	Biological Process	GO:0050830	defense response to Gram-positive bacterium	0.037578848	0.049334798	0	0	1	127
GO:0002821 positive regulation of adaptive immune response	1	0.037870006	16.667	0.008	Biological Process	GO:0002821	positive regulation of adaptive immune response	0.037870006	0.049683828	0	0	1	128
GO:1902936 phosphatidylinositol bisphosphate binding	1	0.031665071	16.667	0.009	Molecular Function	GO:1902936	phosphatidylinositol bisphosphate binding	0.031665071	0.04969657	0	0	1	108
GO:0030218 erythrocyte differentiation	1	0.03816109	16.667	0.008	Biological Process	GO:0030218	erythrocyte differentiation	0.03816109	0.049965587	0	0	1	129
GO:0032368 regulation of lipid transport	1	0.03816109	16.667	0.008	Biological Process	GO:0032368	regulation of lipid transport	0.03816109	0.049965587	0	0	1	129
GO:1903409 reactive oxygen species biosynthetic process	1	0.03816109	16.667	0.008	Biological Process	GO:1903409	reactive oxygen species biosynthetic process	0.03816109	0.049965587	0	0	1	129
GO:0034763 negative regulation of transmembrane transport	1	0.0384521	16.667	0.008	Biological Process	GO:0034763	negative regulation of transmembrane transport	0.0384521	0.050246125	0	0	1	130
GO:0042035 regulation of cytokine biosynthetic process	1	0.0384521	16.667	0.008	Biological Process	GO:0042035	regulation of cytokine biosynthetic process	0.0384521	0.050246125	0	0	1	130
GO:1904019 epithelial cell apoptotic process	1	0.0384521	16.667	0.008	Biological Process	GO:1904019	epithelial cell apoptotic process	0.0384521	0.050246125	0	0	1	130
GO:0002718 regulation of cytokine production involved in immune response	1	0.038743038	16.667	0.008	Biological Process	GO:0002718	regulation of cytokine production involved in immune response	0.038743038	0.050525449	0	0	1	131
GO:0042476 odontogenesis	1	0.038743038	16.667	0.008	Biological Process	GO:0042476	odontogenesis	0.038743038	0.050525449	0	0	1	131
GO:0042552 myelination	1	0.038743038	16.667	0.008	Biological Process	GO:0042552	myelination	0.038743038	0.050525449	0	0	1	131
GO:0031347 regulation of defense response	2	0.039307101	33.333	0.002	Biological Process	GO:0031347	regulation of defense response	0.039307101	0.051182038	0	0	2	1101
GO:0007272 ensheathment of neurons	1	0.039324692	16.667	0.008	Biological Process	GO:0007272	ensheathment of neurons	0.039324692	0.051182038	0	0	1	133
GO:0008366 axon ensheathment	1	0.039324692	16.667	0.008	Biological Process	GO:0008366	axon ensheathment	0.039324692	0.051182038	0	0	1	133
GO:0002223 stimulatory C-type lectin receptor signaling pathway	1	0.039906054	16.667	0.007	Biological Process	GO:0002223	stimulatory C-type lectin receptor signaling pathway	0.039906054	0.051732996	0	0	1	135
GO:0002576 platelet degranulation	1	0.039906054	16.667	0.007	Biological Process	GO:0002576	platelet degranulation	0.039906054	0.051732996	0	0	1	135
GO:0019079 viral genome replication	1	0.039906054	16.667	0.007	Biological Process	GO:0019079	viral genome replication	0.039906054	0.051732996	0	0	1	135
GO:0072676 lymphocyte migration	1	0.039906054	16.667	0.007	Biological Process	GO:0072676	lymphocyte migration	0.039906054	0.051732996	0	0	1	135
GO:1905477 positive regulation of protein localization to membrane	1	0.039906054	16.667	0.007	Biological Process	GO:1905477	positive regulation of protein localization to membrane	0.039906054	0.051732996	0	0	1	135
GO:1990266 neutrophil migration	1	0.039906054	16.667	0.007	Biological Process	GO:1990266	neutrophil migration	0.039906054	0.051732996	0	0	1	135
GO:0008637 apoptotic mitochondrial changes	1	0.040196624	16.667	0.007	Biological Process	GO:0008637	apoptotic mitochondrial changes	0.040196624	0.05207531	0	0	1	136
GO:0055007 cardiac muscle cell differentiation	1	0.040487122	16.667	0.007	Biological Process	GO:0055007	cardiac muscle cell differentiation	0.040487122	0.052417078	0	0	1	137
GO:0051093 negative regulation of developmental process	2	0.040704556	33.333	0.002	Biological Process	GO:0051093	negative regulation of developmental process	0.040704556	0.052654241	0	0	2	1122
GO:0002702 positive regulation of production of molecular mediator of immune response	1	0.040777546	16.667	0.007	Biological Process	GO:0002702	positive regulation of production of molecular mediator of immune response	0.040777546	0.052654241	0	0	1	138
GO:1903825 organic acid transmembrane transport	1	0.040777546	16.667	0.007	Biological Process	GO:1903825	organic acid transmembrane transport	0.040777546	0.052654241	0	0	1	138
GO:1905039 carboxylic acid transmembrane transport	1	0.040777546	16.667	0.007	Biological Process	GO:1905039	carboxylic acid transmembrane transport	0.040777546	0.052654241	0	0	1	138
GO:0034101 erythrocyte homeostasis	1	0.041067897	16.667	0.007	Biological Process	GO:0034101	erythrocyte homeostasis	0.041067897	0.05295952	0	0	1	139
GO:0042102 positive regulation of T cell proliferation	1	0.041067897	16.667	0.007	Biological Process	GO:0042102	positive regulation of T cell proliferation	0.041067897	0.05295952	0	0	1	139
GO:0006357 regulation of transcription by RNA polymerase II	3	0.041197283	50	0.001	Biological Process	GO:0006357	regulation of transcription by RNA polymerase II	0.041197283	0.053091511	0	0	3	2841
GO:0042089 cytokine biosynthetic process	1	0.041358174	16.667	0.007	Biological Process	GO:0042089	cytokine biosynthetic process	0.041358174	0.053194142	0	0	1	140
GO:0071621 granulocyte chemotaxis	1	0.041358174	16.667	0.007	Biological Process	GO:0071621	granulocyte chemotaxis	0.041358174	0.053194142	0	0	1	140
GO:0072329 monocarboxylic acid catabolic process	1	0.041358174	16.667	0.007	Biological Process	GO:0072329	monocarboxylic acid catabolic process	0.041358174	0.053194142	0	0	1	140
GO:0002220 innate immune response activating cell surface receptor signaling pathway	1	0.041648379	16.667	0.007	Biological Process	GO:0002220	innate immune response activating cell surface receptor signaling pathway	0.041648379	0.053288219	0	0	1	141
GO:0007498 mesoderm development	1	0.041648379	16.667	0.007	Biological Process	GO:0007498	mesoderm development	0.041648379	0.053288219	0	0	1	141
GO:0031333 negative regulation of protein complex assembly	1	0.041648379	16.667	0.007	Biological Process	GO:0031333	negative regulation of protein complex assembly	0.041648379	0.053288219	0	0	1	141
GO:0032434 regulation of proteasomal ubiquitin-dependent protein catabolic process	1	0.041648379	16.667	0.007	Biological Process	GO:0032434	regulation of proteasomal ubiquitin-dependent protein catabolic process	0.041648379	0.053288219	0	0	1	141
GO:0035296 regulation of tube diameter	1	0.041648379	16.667	0.007	Biological Process	GO:0035296	regulation of tube diameter	0.041648379	0.053288219	0	0	1	141
GO:0042107 cytokine metabolic process	1	0.041648379	16.667	0.007	Biological Process	GO:0042107	cytokine metabolic process	0.041648379	0.053288219	0	0	1	141
GO:0048565 digestive tract development	1	0.041648379	16.667	0.007	Biological Process	GO:0048565	digestive tract development	0.041648379	0.053288219	0	0	1	141
GO:0097746 regulation of blood vessel diameter	1	0.041648379	16.667	0.007	Biological Process	GO:0097746	regulation of blood vessel diameter	0.041648379	0.053288219	0	0	1	141
GO:0002443 leukocyte mediated immunity	2	0.041850546	33.333	0.002	Biological Process	GO:0002443	leukocyte mediated immunity	0.041850546	0.053512026	0	0	2	1139
GO:0044237 cellular metabolic process	6	0.04191418	100	0.001	Biological Process	GO:0044237	cellular metabolic process	0.04191418	0.05351997	0	0	6	11765
GO:0031644 regulation of neurological system process	1	0.04193851	16.667	0.007	Biological Process	GO:0031644	regulation of neurological system process	0.04193851	0.05351997	0	0	1	142
GO:1903052 positive regulation of proteolysis involved in cellular protein catabolic process	1	0.04193851	16.667	0.007	Biological Process	GO:1903052	positive regulation of proteolysis involved in cellular protein catabolic process	0.04193851	0.05351997	0	0	1	142
GO:0030518 intracellular steroid hormone receptor signaling pathway	1	0.042228568	16.667	0.007	Biological Process	GO:0030518	intracellular steroid hormone receptor signaling pathway	0.042228568	0.053785284	0	0	1	143
GO:0060359 response to ammonium ion	1	0.042228568	16.667	0.007	Biological Process	GO:0060359	response to ammonium ion	0.042228568	0.053785284	0	0	1	143
GO:0072073 kidney epithelium development	1	0.042228568	16.667	0.007	Biological Process	GO:0072073	kidney epithelium development	0.042228568	0.053785284	0	0	1	143
GO:0001837 epithelial to mesenchymal transition	1	0.042518553	16.667	0.007	Biological Process	GO:0001837	epithelial to mesenchymal transition	0.042518553	0.054119532	0	0	1	144
GO:0009411 response to UV	1	0.042808464	16.667	0.007	Biological Process	GO:0009411	response to UV	0.042808464	0.054418009	0	0	1	145
GO:1903670 regulation of sprouting angiogenesis	1	0.042808464	16.667	0.007	Biological Process	GO:1903670	regulation of sprouting angiogenesis	0.042808464	0.054418009	0	0	1	145
GO:0002456 T cell mediated immunity	1	0.043098303	16.667	0.007	Biological Process	GO:0002456	T cell mediated immunity	0.043098303	0.054715622	0	0	1	146
GO:0014013 regulation of gliogenesis	1	0.043098303	16.667	0.007	Biological Process	GO:0014013	regulation of gliogenesis	0.043098303	0.054715622	0	0	1	146
GO:0031056 regulation of histone modification	1	0.043388068	16.667	0.007	Biological Process	GO:0031056	regulation of histone modification	0.043388068	0.055047911	0	0	1	147
GO:0005739 mitochondrion	3	0.008942552	50	0.002	Cellular Component	GO:0005739	mitochondrion	0.008942552	0.055092119	0	0	3	1731
GO:0002102 podosome	1	0.00900198	16.667	0.031	Cellular Component	GO:0002102	podosome	0.00900198	0.055092119	0	0	1	32
GO:0007030 Golgi organization	1	0.04367776	16.667	0.007	Biological Process	GO:0007030	Golgi organization	0.04367776	0.055237039	0	0	1	148
GO:0007292 female gamete generation	1	0.04367776	16.667	0.007	Biological Process	GO:0007292	female gamete generation	0.04367776	0.055237039	0	0	1	148
GO:0043618 regulation of transcription from RNA polymerase II promoter in response to stress	1	0.04367776	16.667	0.007	Biological Process	GO:0043618	regulation of transcription from RNA polymerase II promoter in response to stress	0.04367776	0.055237039	0	0	1	148
GO:0072006 nephron development	1	0.04367776	16.667	0.007	Biological Process	GO:0072006	nephron development	0.04367776	0.055237039	0	0	1	148
GO:2001251 negative regulation of chromosome organization	1	0.04367776	16.667	0.007	Biological Process	GO:2001251	negative regulation of chromosome organization	0.04367776	0.055237039	0	0	1	148
GO:0043467 regulation of generation of precursor metabolites and energy	1	0.043967379	16.667	0.007	Biological Process	GO:0043467	regulation of generation of precursor metabolites and energy	0.043967379	0.055496101	0	0	1	149
GO:0046425 regulation of JAK-STAT cascade	1	0.043967379	16.667	0.007	Biological Process	GO:0046425	regulation of JAK-STAT cascade	0.043967379	0.055496101	0	0	1	149
GO:0050880 regulation of blood vessel size	1	0.043967379	16.667	0.007	Biological Process	GO:0050880	regulation of blood vessel size	0.043967379	0.055496101	0	0	1	149
GO:0002367 cytokine production involved in immune response	1	0.044256925	16.667	0.007	Biological Process	GO:0002367	cytokine production involved in immune response	0.044256925	0.055718334	0	0	1	150
GO:0035150 regulation of tube size	1	0.044256925	16.667	0.007	Biological Process	GO:0035150	regulation of tube size	0.044256925	0.055718334	0	0	1	150
GO:0071901 negative regulation of protein serine/threonine kinase activity	1	0.044256925	16.667	0.007	Biological Process	GO:0071901	negative regulation of protein serine/threonine kinase activity	0.044256925	0.055718334	0	0	1	150
GO:2000241 regulation of reproductive process	1	0.044256925	16.667	0.007	Biological Process	GO:2000241	regulation of reproductive process	0.044256925	0.055718334	0	0	1	150
GO:0032839 dendrite cytoplasm	1	0.009562354	16.667	0.029	Cellular Component	GO:0032839	dendrite cytoplasm	0.009562354	0.056270776	0	0	1	34
GO:0008643 carbohydrate transport	1	0.044835798	16.667	0.007	Biological Process	GO:0008643	carbohydrate transport	0.044835798	0.056374845	0	0	1	152
GO:0019730 antimicrobial humoral response	1	0.044835798	16.667	0.007	Biological Process	GO:0019730	antimicrobial humoral response	0.044835798	0.056374845	0	0	1	152
GO:0044255 cellular lipid metabolic process	2	0.044876935	33.333	0.002	Biological Process	GO:0044255	cellular lipid metabolic process	0.044876935	0.056390467	0	0	2	1183
GO:0035148 tube formation	1	0.045125125	16.667	0.007	Biological Process	GO:0035148	tube formation	0.045125125	0.056593707	0	0	1	153
GO:0055123 digestive system development	1	0.045125125	16.667	0.007	Biological Process	GO:0055123	digestive system development	0.045125125	0.056593707	0	0	1	153
GO:0072655 establishment of protein localization to mitochondrion	1	0.045125125	16.667	0.007	Biological Process	GO:0072655	establishment of protein localization to mitochondrion	0.045125125	0.056593707	0	0	1	153
GO:0009267 cellular response to starvation	1	0.045414379	16.667	0.006	Biological Process	GO:0009267	cellular response to starvation	0.045414379	0.056811363	0	0	1	154
GO:0034605 cellular response to heat	1	0.045414379	16.667	0.006	Biological Process	GO:0034605	cellular response to heat	0.045414379	0.056811363	0	0	1	154
GO:0048592 eye morphogenesis	1	0.045414379	16.667	0.006	Biological Process	GO:0048592	eye morphogenesis	0.045414379	0.056811363	0	0	1	154
GO:1904892 regulation of STAT cascade	1	0.045414379	16.667	0.006	Biological Process	GO:1904892	regulation of STAT cascade	0.045414379	0.056811363	0	0	1	154
GO:0006886 intracellular protein transport	2	0.045646958	33.333	0.002	Biological Process	GO:0006886	intracellular protein transport	0.045646958	0.056919335	0	0	2	1194
GO:0010770 positive regulation of cell morphogenesis involved in differentiation	1	0.045703559	16.667	0.006	Biological Process	GO:0010770	positive regulation of cell morphogenesis involved in differentiation	0.045703559	0.056919335	0	0	1	155
GO:0043620 regulation of DNA-templated transcription in response to stress	1	0.045703559	16.667	0.006	Biological Process	GO:0043620	regulation of DNA-templated transcription in response to stress	0.045703559	0.056919335	0	0	1	155
GO:0061351 neural precursor cell proliferation	1	0.045703559	16.667	0.006	Biological Process	GO:0061351	neural precursor cell proliferation	0.045703559	0.056919335	0	0	1	155
GO:0106106 cold-induced thermogenesis	1	0.045703559	16.667	0.006	Biological Process	GO:0106106	cold-induced thermogenesis	0.045703559	0.056919335	0	0	1	155
GO:0120161 regulation of cold-induced thermogenesis	1	0.045703559	16.667	0.006	Biological Process	GO:0120161	regulation of cold-induced thermogenesis	0.045703559	0.056919335	0	0	1	155
GO:1903038 negative regulation of leukocyte cell-cell adhesion	1	0.045703559	16.667	0.006	Biological Process	GO:1903038	negative regulation of leukocyte cell-cell adhesion	0.045703559	0.056919335	0	0	1	155
GO:0051053 negative regulation of DNA metabolic process	1	0.046281702	16.667	0.006	Biological Process	GO:0051053	negative regulation of DNA metabolic process	0.046281702	0.057566347	0	0	1	157
GO:0060078 regulation of postsynaptic membrane potential	1	0.046281702	16.667	0.006	Biological Process	GO:0060078	regulation of postsynaptic membrane potential	0.046281702	0.057566347	0	0	1	157
GO:0036094 small molecule binding	3	0.03755596	50	0.001	Molecular Function	GO:0036094	small molecule binding	0.03755596	0.057605655	0	0	3	2776
GO:0044325 ion channel binding	1	0.037724058	16.667	0.008	Molecular Function	GO:0044325	ion channel binding	0.037724058	0.057605655	0	0	1	129
GO:0008277 regulation of G protein-coupled receptor signaling pathway	1	0.046570664	16.667	0.006	Biological Process	GO:0008277	regulation of G protein-coupled receptor signaling pathway	0.046570664	0.057779396	0	0	1	158
GO:0034620 cellular response to unfolded protein	1	0.046570664	16.667	0.006	Biological Process	GO:0034620	cellular response to unfolded protein	0.046570664	0.057779396	0	0	1	158
GO:0070585 protein localization to mitochondrion	1	0.046570664	16.667	0.006	Biological Process	GO:0070585	protein localization to mitochondrion	0.046570664	0.057779396	0	0	1	158
GO:0097530 granulocyte migration	1	0.046570664	16.667	0.006	Biological Process	GO:0097530	granulocyte migration	0.046570664	0.057779396	0	0	1	158
GO:0002708 positive regulation of lymphocyte mediated immunity	1	0.046859552	16.667	0.006	Biological Process	GO:0002708	positive regulation of lymphocyte mediated immunity	0.046859552	0.058064455	0	0	1	159
GO:0051384 response to glucocorticoid	1	0.046859552	16.667	0.006	Biological Process	GO:0051384	response to glucocorticoid	0.046859552	0.058064455	0	0	1	159
GO:0046631 alpha-beta T cell activation	1	0.047148368	16.667	0.006	Biological Process	GO:0046631	alpha-beta T cell activation	0.047148368	0.058385495	0	0	1	160
GO:0001764 neuron migration	1	0.047437111	16.667	0.006	Biological Process	GO:0001764	neuron migration	0.047437111	0.05863215	0	0	1	161
GO:0016202 regulation of striated muscle tissue development	1	0.047437111	16.667	0.006	Biological Process	GO:0016202	regulation of striated muscle tissue development	0.047437111	0.05863215	0	0	1	161
GO:0030203 glycosaminoglycan metabolic process	1	0.047437111	16.667	0.006	Biological Process	GO:0030203	glycosaminoglycan metabolic process	0.047437111	0.05863215	0	0	1	161
GO:0006366 transcription by RNA polymerase II	3	0.047687217	50	0.001	Biological Process	GO:0006366	transcription by RNA polymerase II	0.047687217	0.05890421	0	0	3	3003
GO:1903364 positive regulation of cellular protein catabolic process	1	0.047725781	16.667	0.006	Biological Process	GO:1903364	positive regulation of cellular protein catabolic process	0.047725781	0.058914792	0	0	1	162
GO:0090263 positive regulation of canonical Wnt signaling pathway	1	0.048014378	16.667	0.006	Biological Process	GO:0090263	positive regulation of canonical Wnt signaling pathway	0.048014378	0.059159497	0	0	1	163
GO:0090316 positive regulation of intracellular protein transport	1	0.048014378	16.667	0.006	Biological Process	GO:0090316	positive regulation of intracellular protein transport	0.048014378	0.059159497	0	0	1	163
GO:1990845 adaptive thermogenesis	1	0.048014378	16.667	0.006	Biological Process	GO:1990845	adaptive thermogenesis	0.048014378	0.059159497	0	0	1	163
GO:0055067 monovalent inorganic cation homeostasis	1	0.048302903	16.667	0.006	Biological Process	GO:0055067	monovalent inorganic cation homeostasis	0.048302903	0.059440414	0	0	1	164
GO:1901861 regulation of muscle tissue development	1	0.048302903	16.667	0.006	Biological Process	GO:1901861	regulation of muscle tissue development	0.048302903	0.059440414	0	0	1	164
GO:0044430 cytoskeletal part	3	0.010514887	50	0.002	Cellular Component	GO:0044430	cytoskeletal part	0.010514887	0.059584362	0	0	3	1834
GO:0048634 regulation of muscle organ development	1	0.048591354	16.667	0.006	Biological Process	GO:0048634	regulation of muscle organ development	0.048591354	0.059757933	0	0	1	165
GO:0005178 integrin binding	1	0.039736685	16.667	0.007	Molecular Function	GO:0005178	integrin binding	0.039736685	0.059869939	0	0	1	136
GO:0000187 activation of MAPK activity	1	0.048879732	16.667	0.006	Biological Process	GO:0000187	activation of MAPK activity	0.048879732	0.060037395	0	0	1	166
GO:0008360 regulation of cell shape	1	0.048879732	16.667	0.006	Biological Process	GO:0008360	regulation of cell shape	0.048879732	0.060037395	0	0	1	166
GO:0043271 negative regulation of ion transport	1	0.049168038	16.667	0.006	Biological Process	GO:0043271	negative regulation of ion transport	0.049168038	0.060353767	0	0	1	167
GO:0051017 actin filament bundle assembly	1	0.049744431	16.667	0.006	Biological Process	GO:0051017	actin filament bundle assembly	0.049744431	0.061023149	0	0	1	169
GO:0007259 JAK-STAT cascade	1	0.050032518	16.667	0.006	Biological Process	GO:0007259	JAK-STAT cascade	0.050032518	0.061338243	0	0	1	170
GO:0006022 aminoglycan metabolic process	1	0.050320532	16.667	0.006	Biological Process	GO:0006022	aminoglycan metabolic process	0.050320532	0.061576028	0	0	1	171
GO:0051100 negative regulation of binding	1	0.050320532	16.667	0.006	Biological Process	GO:0051100	negative regulation of binding	0.050320532	0.061576028	0	0	1	171
GO:1990138 neuron projection extension	1	0.050320532	16.667	0.006	Biological Process	GO:1990138	neuron projection extension	0.050320532	0.061576028	0	0	1	171
GO:0015718 monocarboxylic acid transport	1	0.050608474	16.667	0.006	Biological Process	GO:0015718	monocarboxylic acid transport	0.050608474	0.061851302	0	0	1	172
GO:0032675 regulation of interleukin-6 production	1	0.050608474	16.667	0.006	Biological Process	GO:0032675	regulation of interleukin-6 production	0.050608474	0.061851302	0	0	1	172
GO:0061572 actin filament bundle organization	1	0.050896343	16.667	0.006	Biological Process	GO:0061572	actin filament bundle organization	0.050896343	0.062164439	0	0	1	173
GO:0019637 organophosphate metabolic process	2	0.05111057	33.333	0.002	Biological Process	GO:0019637	organophosphate metabolic process	0.05111057	0.062387296	0	0	2	1270
GO:0042133 neurotransmitter metabolic process	1	0.051471862	16.667	0.006	Biological Process	GO:0042133	neurotransmitter metabolic process	0.051471862	0.062750303	0	0	1	175
GO:0045931 positive regulation of mitotic cell cycle	1	0.051471862	16.667	0.006	Biological Process	GO:0045931	positive regulation of mitotic cell cycle	0.051471862	0.062750303	0	0	1	175
GO:0051641 cellular localization	3	0.0515676	50	0.001	Biological Process	GO:0051641	cellular localization	0.0515676	0.062828019	0	0	3	3094
GO:0097696 STAT cascade	1	0.051759513	16.667	0.006	Biological Process	GO:0097696	STAT cascade	0.051759513	0.062983695	0	0	1	176
GO:2000058 regulation of ubiquitin-dependent protein catabolic process	1	0.051759513	16.667	0.006	Biological Process	GO:2000058	regulation of ubiquitin-dependent protein catabolic process	0.051759513	0.062983695	0	0	1	176
GO:0050671 positive regulation of lymphocyte proliferation	1	0.052047091	16.667	0.006	Biological Process	GO:0050671	positive regulation of lymphocyte proliferation	0.052047091	0.063294419	0	0	1	177
GO:0002822 regulation of adaptive immune response based on somatic recombination of immune receptors built from immunoglobulin superfamily domains	1	0.052334596	16.667	0.006	Biological Process	GO:0002822	regulation of adaptive immune response based on somatic recombination of immune receptors built from immunoglobulin superfamily domains	0.052334596	0.063526049	0	0	1	178
GO:0032946 positive regulation of mononuclear cell proliferation	1	0.052334596	16.667	0.006	Biological Process	GO:0032946	positive regulation of mononuclear cell proliferation	0.052334596	0.063526049	0	0	1	178
GO:0055002 striated muscle cell development	1	0.052334596	16.667	0.006	Biological Process	GO:0055002	striated muscle cell development	0.052334596	0.063526049	0	0	1	178
GO:0032635 interleukin-6 production	1	0.052909389	16.667	0.006	Biological Process	GO:0032635	interleukin-6 production	0.052909389	0.064065376	0	0	1	180
GO:0045807 positive regulation of endocytosis	1	0.052909389	16.667	0.006	Biological Process	GO:0045807	positive regulation of endocytosis	0.052909389	0.064065376	0	0	1	180
GO:0051302 regulation of cell division	1	0.052909389	16.667	0.006	Biological Process	GO:0051302	regulation of cell division	0.052909389	0.064065376	0	0	1	180
GO:1903900 regulation of viral life cycle	1	0.052909389	16.667	0.006	Biological Process	GO:1903900	regulation of viral life cycle	0.052909389	0.064065376	0	0	1	180
GO:0045892 negative regulation of transcription, DNA-templated	2	0.053185405	33.333	0.002	Biological Process	GO:0045892	negative regulation of transcription, DNA-templated	0.053185405	0.064333911	0	0	2	1298
GO:0016241 regulation of macroautophagy	1	0.053196676	16.667	0.006	Biological Process	GO:0016241	regulation of macroautophagy	0.053196676	0.064333911	0	0	1	181
GO:0050715 positive regulation of cytokine secretion	1	0.053483891	16.667	0.005	Biological Process	GO:0050715	positive regulation of cytokine secretion	0.053483891	0.064611078	0	0	1	182
GO:0050794 regulation of cellular process	6	0.053491656	100	0	Biological Process	GO:0050794	regulation of cellular process	0.053491656	0.064611078	0	0	6	12253
GO:0048469 cell maturation	1	0.053771033	16.667	0.005	Biological Process	GO:0048469	cell maturation	0.053771033	0.06490861	0	0	1	183
GO:0004713 protein tyrosine kinase activity	1	0.043751418	16.667	0.007	Molecular Function	GO:0004713	protein tyrosine kinase activity	0.043751418	0.065046627	0	0	1	150
GO:0019903 protein phosphatase binding	1	0.044323808	16.667	0.007	Molecular Function	GO:0019903	protein phosphatase binding	0.044323808	0.065046627	0	0	1	152
GO:0070665 positive regulation of leukocyte proliferation	1	0.054058103	16.667	0.005	Biological Process	GO:0070665	positive regulation of leukocyte proliferation	0.054058103	0.065215057	0	0	1	184
GO:0002705 positive regulation of leukocyte mediated immunity	1	0.0543451	16.667	0.005	Biological Process	GO:0002705	positive regulation of leukocyte mediated immunity	0.0543451	0.065521041	0	0	1	185
GO:0051897 positive regulation of protein kinase B signaling	1	0.054632024	16.667	0.005	Biological Process	GO:0051897	positive regulation of protein kinase B signaling	0.054632024	0.065826561	0	0	1	186
GO:0050770 regulation of axonogenesis	1	0.054918876	16.667	0.005	Biological Process	GO:0050770	regulation of axonogenesis	0.054918876	0.066091098	0	0	1	187
GO:0060491 regulation of cell projection assembly	1	0.054918876	16.667	0.005	Biological Process	GO:0060491	regulation of cell projection assembly	0.054918876	0.066091098	0	0	1	187
GO:0071704 organic substance metabolic process	6	0.055109818	100	0	Biological Process	GO:0071704	organic substance metabolic process	0.055109818	0.06628027	0	0	6	12314
GO:1902275 regulation of chromatin organization	1	0.055205655	16.667	0.005	Biological Process	GO:1902275	regulation of chromatin organization	0.055205655	0.0663549	0	0	1	188
GO:1901981 phosphatidylinositol phosphate binding	1	0.046324924	16.667	0.006	Molecular Function	GO:1901981	phosphatidylinositol phosphate binding	0.046324924	0.066643834	0	0	1	159
GO:0020037 heme binding	1	0.046610512	16.667	0.006	Molecular Function	GO:0020037	heme binding	0.046610512	0.066643834	0	0	1	160
GO:0035257 nuclear hormone receptor binding	1	0.047181475	16.667	0.006	Molecular Function	GO:0035257	nuclear hormone receptor binding	0.047181475	0.066643834	0	0	1	162
GO:0043409 negative regulation of MAPK cascade	1	0.055492362	16.667	0.005	Biological Process	GO:0043409	negative regulation of MAPK cascade	0.055492362	0.066658715	0	0	1	189
GO:0002700 regulation of production of molecular mediator of immune response	1	0.055778996	16.667	0.005	Biological Process	GO:0002700	regulation of production of molecular mediator of immune response	0.055778996	0.06688031	0	0	1	190
GO:0035967 cellular response to topologically incorrect protein	1	0.055778996	16.667	0.005	Biological Process	GO:0035967	cellular response to topologically incorrect protein	0.055778996	0.06688031	0	0	1	190
GO:0050853 B cell receptor signaling pathway	1	0.055778996	16.667	0.005	Biological Process	GO:0050853	B cell receptor signaling pathway	0.055778996	0.06688031	0	0	1	190
GO:0050729 positive regulation of inflammatory response	1	0.056065558	16.667	0.005	Biological Process	GO:0050729	positive regulation of inflammatory response	0.056065558	0.067182889	0	0	1	191
GO:0001659 temperature homeostasis	1	0.056352047	16.667	0.005	Biological Process	GO:0001659	temperature homeostasis	0.056352047	0.067402814	0	0	1	192
GO:0001959 regulation of cytokine-mediated signaling pathway	1	0.056352047	16.667	0.005	Biological Process	GO:0001959	regulation of cytokine-mediated signaling pathway	0.056352047	0.067402814	0	0	1	192
GO:0055001 muscle cell development	1	0.056352047	16.667	0.005	Biological Process	GO:0055001	muscle cell development	0.056352047	0.067402814	0	0	1	192
GO:0002285 lymphocyte activation involved in immune response	1	0.056638464	16.667	0.005	Biological Process	GO:0002285	lymphocyte activation involved in immune response	0.056638464	0.06762185	0	0	1	193
GO:0006986 response to unfolded protein	1	0.056638464	16.667	0.005	Biological Process	GO:0006986	response to unfolded protein	0.056638464	0.06762185	0	0	1	193
GO:0032874 positive regulation of stress-activated MAPK cascade	1	0.056638464	16.667	0.005	Biological Process	GO:0032874	positive regulation of stress-activated MAPK cascade	0.056638464	0.06762185	0	0	1	193
GO:0030177 positive regulation of Wnt signaling pathway	1	0.056924808	16.667	0.005	Biological Process	GO:0030177	positive regulation of Wnt signaling pathway	0.056924808	0.067757772	0	0	1	194
GO:0042594 response to starvation	1	0.056924808	16.667	0.005	Biological Process	GO:0042594	response to starvation	0.056924808	0.067757772	0	0	1	194
GO:0043123 positive regulation of I-kappaB kinase/NF-kappaB signaling	1	0.056924808	16.667	0.005	Biological Process	GO:0043123	positive regulation of I-kappaB kinase/NF-kappaB signaling	0.056924808	0.067757772	0	0	1	194
GO:0050806 positive regulation of synaptic transmission	1	0.056924808	16.667	0.005	Biological Process	GO:0050806	positive regulation of synaptic transmission	0.056924808	0.067757772	0	0	1	194
GO:0070304 positive regulation of stress-activated protein kinase signaling cascade	1	0.056924808	16.667	0.005	Biological Process	GO:0070304	positive regulation of stress-activated protein kinase signaling cascade	0.056924808	0.067757772	0	0	1	194
GO:2000045 regulation of G1/S transition of mitotic cell cycle	1	0.05721108	16.667	0.005	Biological Process	GO:2000045	regulation of G1/S transition of mitotic cell cycle	0.05721108	0.068057275	0	0	1	195
GO:1903507 negative regulation of nucleic acid-templated transcription	2	0.057355363	33.333	0.001	Biological Process	GO:1903507	negative regulation of nucleic acid-templated transcription	0.057355363	0.06818761	0	0	2	1353
GO:1902679 negative regulation of RNA biosynthetic process	2	0.057509319	33.333	0.001	Biological Process	GO:1902679	negative regulation of RNA biosynthetic process	0.057509319	0.068329282	0	0	2	1355
GO:0010565 regulation of cellular ketone metabolic process	1	0.057783407	16.667	0.005	Biological Process	GO:0010565	regulation of cellular ketone metabolic process	0.057783407	0.068613429	0	0	1	197
GO:1901796 regulation of signal transduction by p53 class mediator	1	0.058069462	16.667	0.005	Biological Process	GO:1901796	regulation of signal transduction by p53 class mediator	0.058069462	0.068911434	0	0	1	198
GO:0046906 tetrapyrrole binding	1	0.049462479	16.667	0.006	Molecular Function	GO:0046906	tetrapyrrole binding	0.049462479	0.069003212	0	0	1	170
GO:0002819 regulation of adaptive immune response	1	0.058355444	16.667	0.005	Biological Process	GO:0002819	regulation of adaptive immune response	0.058355444	0.069125508	0	0	1	199
GO:0046890 regulation of lipid biosynthetic process	1	0.058355444	16.667	0.005	Biological Process	GO:0046890	regulation of lipid biosynthetic process	0.058355444	0.069125508	0	0	1	199
GO:1905475 regulation of protein localization to membrane	1	0.058355444	16.667	0.005	Biological Process	GO:1905475	regulation of protein localization to membrane	0.058355444	0.069125508	0	0	1	199
GO:0010821 regulation of mitochondrion organization	1	0.058641354	16.667	0.005	Biological Process	GO:0010821	regulation of mitochondrion organization	0.058641354	0.069380493	0	0	1	200
GO:0043401 steroid hormone mediated signaling pathway	1	0.058641354	16.667	0.005	Biological Process	GO:0043401	steroid hormone mediated signaling pathway	0.058641354	0.069380493	0	0	1	200
GO:0043488 regulation of mRNA stability	1	0.058927192	16.667	0.005	Biological Process	GO:0043488	regulation of mRNA stability	0.058927192	0.06963478	0	0	1	201
GO:0048167 regulation of synaptic plasticity	1	0.058927192	16.667	0.005	Biological Process	GO:0048167	regulation of synaptic plasticity	0.058927192	0.06963478	0	0	1	201
GO:0008201 heparin binding	1	0.051170244	16.667	0.006	Molecular Function	GO:0008201	heparin binding	0.051170244	0.070515093	0	0	1	176
GO:0050871 positive regulation of B cell activation	1	0.059784271	16.667	0.005	Biological Process	GO:0050871	positive regulation of B cell activation	0.059784271	0.070520305	0	0	1	204
GO:0060759 regulation of response to cytokine stimulus	1	0.059784271	16.667	0.005	Biological Process	GO:0060759	regulation of response to cytokine stimulus	0.059784271	0.070520305	0	0	1	204
GO:2000377 regulation of reactive oxygen species metabolic process	1	0.059784271	16.667	0.005	Biological Process	GO:2000377	regulation of reactive oxygen species metabolic process	0.059784271	0.070520305	0	0	1	204
GO:0031032 actomyosin structure organization	1	0.060069819	16.667	0.005	Biological Process	GO:0031032	actomyosin structure organization	0.060069819	0.07077212	0	0	1	205
GO:0034764 positive regulation of transmembrane transport	1	0.060069819	16.667	0.005	Biological Process	GO:0034764	positive regulation of transmembrane transport	0.060069819	0.07077212	0	0	1	205
GO:0007219 Notch signaling pathway	1	0.060355295	16.667	0.005	Biological Process	GO:0007219	Notch signaling pathway	0.060355295	0.07093824	0	0	1	206
GO:0046328 regulation of JNK cascade	1	0.060355295	16.667	0.005	Biological Process	GO:0046328	regulation of JNK cascade	0.060355295	0.07093824	0	0	1	206
GO:0061136 regulation of proteasomal protein catabolic process	1	0.060355295	16.667	0.005	Biological Process	GO:0061136	regulation of proteasomal protein catabolic process	0.060355295	0.07093824	0	0	1	206
GO:1905330 regulation of morphogenesis of an epithelium	1	0.060355295	16.667	0.005	Biological Process	GO:1905330	regulation of morphogenesis of an epithelium	0.060355295	0.07093824	0	0	1	206
GO:0007179 transforming growth factor beta receptor signaling pathway	1	0.060640699	16.667	0.005	Biological Process	GO:0007179	transforming growth factor beta receptor signaling pathway	0.060640699	0.07123106	0	0	1	207
GO:0007010 cytoskeleton organization	2	0.060700703	33.333	0.001	Biological Process	GO:0007010	cytoskeleton organization	0.060700703	0.071258925	0	0	2	1396
GO:0005615 extracellular space	4	0.013076022	66.667	0.001	Cellular Component	GO:0005615	extracellular space	0.013076022	0.071451118	0	0	4	3958
GO:0022408 negative regulation of cell-cell adhesion	1	0.061496477	16.667	0.005	Biological Process	GO:0022408	negative regulation of cell-cell adhesion	0.061496477	0.072149989	0	0	1	210
GO:0043487 regulation of RNA stability	1	0.062066635	16.667	0.005	Biological Process	GO:0043487	regulation of RNA stability	0.062066635	0.072732023	0	0	1	212
GO:1902115 regulation of organelle assembly	1	0.062066635	16.667	0.005	Biological Process	GO:1902115	regulation of organelle assembly	0.062066635	0.072732023	0	0	1	212
GO:0030674 protein binding, bridging	1	0.053727097	16.667	0.005	Molecular Function	GO:0030674	protein binding, bridging	0.053727097	0.07314653	0	0	1	185
GO:0002673 regulation of acute inflammatory response	1	0.062636504	16.667	0.005	Biological Process	GO:0002673	regulation of acute inflammatory response	0.062636504	0.073312333	0	0	1	214
GO:1902806 regulation of cell cycle G1/S phase transition	1	0.062636504	16.667	0.005	Biological Process	GO:1902806	regulation of cell cycle G1/S phase transition	0.062636504	0.073312333	0	0	1	214
GO:0042129 regulation of T cell proliferation	1	0.062921331	16.667	0.005	Biological Process	GO:0042129	regulation of T cell proliferation	0.062921331	0.073601842	0	0	1	215
GO:0016051 carbohydrate biosynthetic process	1	0.063490767	16.667	0.005	Biological Process	GO:0016051	carbohydrate biosynthetic process	0.063490767	0.074179575	0	0	1	217
GO:0031396 regulation of protein ubiquitination	1	0.063490767	16.667	0.005	Biological Process	GO:0031396	regulation of protein ubiquitination	0.063490767	0.074179575	0	0	1	217
GO:0038095 Fc-epsilon receptor signaling pathway	1	0.063775377	16.667	0.005	Biological Process	GO:0038095	Fc-epsilon receptor signaling pathway	0.063775377	0.0744678	0	0	1	218
GO:0002706 regulation of lymphocyte mediated immunity	1	0.064344381	16.667	0.005	Biological Process	GO:0002706	regulation of lymphocyte mediated immunity	0.064344381	0.075042971	0	0	1	220
GO:0032388 positive regulation of intracellular transport	1	0.064344381	16.667	0.005	Biological Process	GO:0032388	positive regulation of intracellular transport	0.064344381	0.075042971	0	0	1	220
GO:0051253 negative regulation of RNA metabolic process	2	0.064682154	33.333	0.001	Biological Process	GO:0051253	negative regulation of RNA metabolic process	0.064682154	0.075392137	0	0	2	1446
GO:0038061 NIK/NF-kappaB signaling	1	0.065197346	16.667	0.004	Biological Process	GO:0038061	NIK/NF-kappaB signaling	0.065197346	0.075902541	0	0	1	223
GO:0061013 regulation of mRNA catabolic process	1	0.065197346	16.667	0.004	Biological Process	GO:0061013	regulation of mRNA catabolic process	0.065197346	0.075902541	0	0	1	223
GO:0051427 hormone receptor binding	1	0.056561308	16.667	0.005	Molecular Function	GO:0051427	hormone receptor binding	0.056561308	0.076088427	0	0	1	195
GO:0006814 sodium ion transport	1	0.065481524	16.667	0.004	Biological Process	GO:0006814	sodium ion transport	0.065481524	0.076188218	0	0	1	224
GO:0035966 response to topologically incorrect protein	1	0.066333625	16.667	0.004	Biological Process	GO:0035966	response to topologically incorrect protein	0.066333625	0.077133949	0	0	1	227
GO:0060348 bone development	1	0.066617515	16.667	0.004	Biological Process	GO:0060348	bone development	0.066617515	0.077418224	0	0	1	228
GO:0008022 protein C-terminus binding	1	0.058541044	16.667	0.005	Molecular Function	GO:0008022	protein C-terminus binding	0.058541044	0.077825153	0	0	1	202
GO:0005516 calmodulin binding	1	0.059670766	16.667	0.005	Molecular Function	GO:0005516	calmodulin binding	0.059670766	0.077870015	0	0	1	206
GO:0060090 molecular adaptor activity	1	0.05995302	16.667	0.005	Molecular Function	GO:0060090	molecular adaptor activity	0.05995302	0.077870015	0	0	1	207
GO:0043583 ear development	1	0.067752355	16.667	0.004	Biological Process	GO:0043583	ear development	0.067752355	0.078690494	0	0	1	232
GO:0046983 protein dimerization activity	2	0.061290117	33.333	0.001	Molecular Function	GO:0046983	protein dimerization activity	0.061290117	0.078702082	0	0	2	1420
GO:0070613 regulation of protein processing	1	0.068319344	16.667	0.004	Biological Process	GO:0070613	regulation of protein processing	0.068319344	0.079302122	0	0	1	234
GO:0007254 JNK cascade	1	0.068886045	16.667	0.004	Biological Process	GO:0007254	JNK cascade	0.068886045	0.079865521	0	0	1	236
GO:1903317 regulation of protein maturation	1	0.068886045	16.667	0.004	Biological Process	GO:1903317	regulation of protein maturation	0.068886045	0.079865521	0	0	1	236
GO:0044242 cellular lipid catabolic process	1	0.069452459	16.667	0.004	Biological Process	GO:0044242	cellular lipid catabolic process	0.069452459	0.080427258	0	0	1	238
GO:0048588 developmental cell growth	1	0.069452459	16.667	0.004	Biological Process	GO:0048588	developmental cell growth	0.069452459	0.080427258	0	0	1	238
GO:0002377 immunoglobulin production	1	0.069735558	16.667	0.004	Biological Process	GO:0002377	immunoglobulin production	0.069735558	0.080659975	0	0	1	239
GO:0019722 calcium-mediated signaling	1	0.069735558	16.667	0.004	Biological Process	GO:0019722	calcium-mediated signaling	0.069735558	0.080659975	0	0	1	239
GO:0022402 cell cycle process	2	0.069917925	33.333	0.001	Biological Process	GO:0022402	cell cycle process	0.069917925	0.080823311	0	0	2	1510
GO:0033157 regulation of intracellular protein transport	1	0.070018586	16.667	0.004	Biological Process	GO:0033157	regulation of intracellular protein transport	0.070018586	0.080844505	0	0	1	240
GO:1901215 negative regulation of neuron death	1	0.070018586	16.667	0.004	Biological Process	GO:1901215	negative regulation of neuron death	0.070018586	0.080844505	0	0	1	240
GO:0060560 developmental growth involved in morphogenesis	1	0.070301542	16.667	0.004	Biological Process	GO:0060560	developmental growth involved in morphogenesis	0.070301542	0.081123518	0	0	1	241
GO:0031669 cellular response to nutrient levels	1	0.070584426	16.667	0.004	Biological Process	GO:0031669	cellular response to nutrient levels	0.070584426	0.081402121	0	0	1	242
GO:0008152 metabolic process	6	0.070834674	100	0	Biological Process	GO:0008152	metabolic process	0.070834674	0.081632408	0	0	6	12840
GO:1903320 regulation of protein modification by small protein conjugation or removal	1	0.070867238	16.667	0.004	Biological Process	GO:1903320	regulation of protein modification by small protein conjugation or removal	0.070867238	0.081632408	0	0	1	243
GO:0042098 T cell proliferation	1	0.071149979	16.667	0.004	Biological Process	GO:0042098	T cell proliferation	0.071149979	0.081910058	0	0	1	244
GO:0030258 lipid modification	1	0.071432648	16.667	0.004	Biological Process	GO:0030258	lipid modification	0.071432648	0.082187299	0	0	1	245
GO:1903050 regulation of proteolysis involved in cellular protein catabolic process	1	0.071715245	16.667	0.004	Biological Process	GO:1903050	regulation of proteolysis involved in cellular protein catabolic process	0.071715245	0.082464134	0	0	1	246
GO:0043122 regulation of I-kappaB kinase/NF-kappaB signaling	1	0.071997771	16.667	0.004	Biological Process	GO:0043122	regulation of I-kappaB kinase/NF-kappaB signaling	0.071997771	0.082692176	0	0	1	247
GO:0050864 regulation of B cell activation	1	0.071997771	16.667	0.004	Biological Process	GO:0050864	regulation of B cell activation	0.071997771	0.082692176	0	0	1	247
GO:0006629 lipid metabolic process	2	0.072088549	33.333	0.001	Biological Process	GO:0006629	lipid metabolic process	0.072088549	0.082748048	0	0	2	1536
GO:0006469 negative regulation of protein kinase activity	1	0.072562607	16.667	0.004	Biological Process	GO:0006469	negative regulation of protein kinase activity	0.072562607	0.083243551	0	0	1	249
GO:0044421 extracellular region part	4	0.015841431	66.667	0.001	Cellular Component	GO:0044421	extracellular region part	0.015841431	0.083317099	0	0	4	4172
GO:0120025 plasma membrane bounded cell projection	3	0.017749701	50	0.001	Cellular Component	GO:0120025	plasma membrane bounded cell projection	0.017749701	0.083317099	0	0	3	2215
GO:0031982 vesicle	4	0.017989991	66.667	0.001	Cellular Component	GO:0031982	vesicle	0.017989991	0.083317099	0	0	4	4321
GO:0005815 microtubule organizing center	2	0.018740326	33.333	0.003	Cellular Component	GO:0005815	microtubule organizing center	0.018740326	0.083317099	0	0	2	790
GO:0005764 lysosome	2	0.01905711	33.333	0.003	Cellular Component	GO:0005764	lysosome	0.01905711	0.083317099	0	0	2	797
GO:0000323 lytic vacuole	2	0.019148053	33.333	0.003	Cellular Component	GO:0000323	lytic vacuole	0.019148053	0.083317099	0	0	2	799
GO:0042995 cell projection	3	0.019402419	50	0.001	Cellular Component	GO:0042995	cell projection	0.019402419	0.083317099	0	0	3	2288
GO:0031093 platelet alpha granule lumen	1	0.019604023	16.667	0.014	Cellular Component	GO:0031093	platelet alpha granule lumen	0.019604023	0.083317099	0	0	1	70
GO:0050792 regulation of viral process	1	0.072844917	16.667	0.004	Biological Process	GO:0050792	regulation of viral process	0.072844917	0.083518632	0	0	1	250
GO:0045732 positive regulation of protein catabolic process	1	0.073127156	16.667	0.004	Biological Process	GO:0045732	positive regulation of protein catabolic process	0.073127156	0.083793311	0	0	1	251
GO:0070374 positive regulation of ERK1 and ERK2 cascade	1	0.073409324	16.667	0.004	Biological Process	GO:0070374	positive regulation of ERK1 and ERK2 cascade	0.073409324	0.084067587	0	0	1	252
GO:0030217 T cell differentiation	1	0.074255396	16.667	0.004	Biological Process	GO:0030217	T cell differentiation	0.074255396	0.084937448	0	0	1	255
GO:0097305 response to alcohol	1	0.074255396	16.667	0.004	Biological Process	GO:0097305	response to alcohol	0.074255396	0.084937448	0	0	1	255
GO:0071560 cellular response to transforming growth factor beta stimulus	1	0.074819087	16.667	0.004	Biological Process	GO:0071560	cellular response to transforming growth factor beta stimulus	0.074819087	0.085532414	0	0	1	257
GO:0042593 glucose homeostasis	1	0.075382492	16.667	0.004	Biological Process	GO:0042593	glucose homeostasis	0.075382492	0.086126361	0	0	1	259
GO:0045934 negative regulation of nucleobase-containing compound metabolic process	2	0.075561378	33.333	0.001	Biological Process	GO:0045934	negative regulation of nucleobase-containing compound metabolic process	0.075561378	0.086247398	0	0	2	1577
GO:0007050 cell cycle arrest	1	0.075664087	16.667	0.004	Biological Process	GO:0007050	cell cycle arrest	0.075664087	0.086247398	0	0	1	260
GO:0009755 hormone-mediated signaling pathway	1	0.075664087	16.667	0.004	Biological Process	GO:0009755	hormone-mediated signaling pathway	0.075664087	0.086247398	0	0	1	260
GO:0033500 carbohydrate homeostasis	1	0.075664087	16.667	0.004	Biological Process	GO:0033500	carbohydrate homeostasis	0.075664087	0.086247398	0	0	1	260
GO:0005856 cytoskeleton	3	0.02107053	50	0.001	Cellular Component	GO:0005856	cytoskeleton	0.02107053	0.08712949	0	0	3	2358
GO:2000113 negative regulation of cellular macromolecule biosynthetic process	2	0.076761	33.333	0.001	Biological Process	GO:2000113	negative regulation of cellular macromolecule biosynthetic process	0.076761	0.087378374	0	0	2	1591
GO:0051607 defense response to virus	1	0.076789753	16.667	0.004	Biological Process	GO:0051607	defense response to virus	0.076789753	0.087378374	0	0	1	264
GO:0071559 response to transforming growth factor beta	1	0.076789753	16.667	0.004	Biological Process	GO:0071559	response to transforming growth factor beta	0.076789753	0.087378374	0	0	1	264
GO:0003007 heart morphogenesis	1	0.077070991	16.667	0.004	Biological Process	GO:0003007	heart morphogenesis	0.077070991	0.087647612	0	0	1	265
GO:0050707 regulation of cytokine secretion	1	0.077352157	16.667	0.004	Biological Process	GO:0050707	regulation of cytokine secretion	0.077352157	0.087916456	0	0	1	266
GO:0005539 glycosaminoglycan binding	1	0.06978753	16.667	0.004	Molecular Function	GO:0005539	glycosaminoglycan binding	0.06978753	0.088606639	0	0	1	242
GO:0002703 regulation of leukocyte mediated immunity	1	0.078195228	16.667	0.004	Biological Process	GO:0002703	regulation of leukocyte mediated immunity	0.078195228	0.088823267	0	0	1	269
GO:0071383 cellular response to steroid hormone stimulus	1	0.078476109	16.667	0.004	Biological Process	GO:0071383	cellular response to steroid hormone stimulus	0.078476109	0.089090797	0	0	1	270
GO:0042180 cellular ketone metabolic process	1	0.078756919	16.667	0.004	Biological Process	GO:0042180	cellular ketone metabolic process	0.078756919	0.089357937	0	0	1	271
GO:0007611 learning or memory	1	0.079037657	16.667	0.004	Biological Process	GO:0007611	learning or memory	0.079037657	0.089572971	0	0	1	272
GO:0033673 negative regulation of kinase activity	1	0.079037657	16.667	0.004	Biological Process	GO:0033673	negative regulation of kinase activity	0.079037657	0.089572971	0	0	1	272
GO:0035091 phosphatidylinositol binding	1	0.071744106	16.667	0.004	Molecular Function	GO:0035091	phosphatidylinositol binding	0.071744106	0.090078711	0	0	1	249
GO:0030072 peptide hormone secretion	1	0.07959892	16.667	0.004	Biological Process	GO:0030072	peptide hormone secretion	0.07959892	0.09010506	0	0	1	274
GO:0031668 cellular response to extracellular stimulus	1	0.07959892	16.667	0.004	Biological Process	GO:0031668	cellular response to extracellular stimulus	0.07959892	0.09010506	0	0	1	274
GO:0031330 negative regulation of cellular catabolic process	1	0.080159898	16.667	0.004	Biological Process	GO:0031330	negative regulation of cellular catabolic process	0.080159898	0.090635602	0	0	1	276
GO:0050670 regulation of lymphocyte proliferation	1	0.080159898	16.667	0.004	Biological Process	GO:0050670	regulation of lymphocyte proliferation	0.080159898	0.090635602	0	0	1	276
GO:0050789 regulation of biological process	6	0.080293641	100	0	Biological Process	GO:0050789	regulation of biological process	0.080293641	0.090734586	0	0	6	13111
GO:0032944 regulation of mononuclear cell proliferation	1	0.08044028	16.667	0.004	Biological Process	GO:0032944	regulation of mononuclear cell proliferation	0.08044028	0.090795811	0	0	1	277
GO:1903362 regulation of cellular protein catabolic process	1	0.08044028	16.667	0.004	Biological Process	GO:1903362	regulation of cellular protein catabolic process	0.08044028	0.090795811	0	0	1	277
GO:0043903 regulation of symbiosis, encompassing mutualism through parasitism	1	0.080720591	16.667	0.004	Biological Process	GO:0043903	regulation of symbiosis, encompassing mutualism through parasitism	0.080720591	0.091059874	0	0	1	278
GO:0072659 protein localization to plasma membrane	1	0.081000831	16.667	0.004	Biological Process	GO:0072659	protein localization to plasma membrane	0.081000831	0.091323554	0	0	1	279
GO:1901681 sulfur compound binding	1	0.073697251	16.667	0.004	Molecular Function	GO:1901681	sulfur compound binding	0.073697251	0.091514169	0	0	1	256
GO:0002526 acute inflammatory response	1	0.081280999	16.667	0.004	Biological Process	GO:0002526	acute inflammatory response	0.081280999	0.091586852	0	0	1	280
GO:0048863 stem cell differentiation	1	0.081561096	16.667	0.004	Biological Process	GO:0048863	stem cell differentiation	0.081561096	0.091797131	0	0	1	281
GO:0050852 T cell receptor signaling pathway	1	0.081561096	16.667	0.004	Biological Process	GO:0050852	T cell receptor signaling pathway	0.081561096	0.091797131	0	0	1	281
GO:2000027 regulation of animal organ morphogenesis	1	0.081841123	16.667	0.004	Biological Process	GO:2000027	regulation of animal organ morphogenesis	0.081841123	0.092059544	0	0	1	282
GO:0002699 positive regulation of immune effector process	1	0.082121077	16.667	0.004	Biological Process	GO:0002699	positive regulation of immune effector process	0.082121077	0.092321578	0	0	1	283
GO:0045165 cell fate commitment	1	0.082680774	16.667	0.004	Biological Process	GO:0045165	cell fate commitment	0.082680774	0.09289762	0	0	1	285
GO:0007249 I-kappaB kinase/NF-kappaB signaling	1	0.082960516	16.667	0.003	Biological Process	GO:0007249	I-kappaB kinase/NF-kappaB signaling	0.082960516	0.093158635	0	0	1	286
GO:0043270 positive regulation of ion transport	1	0.083519785	16.667	0.003	Biological Process	GO:0043270	positive regulation of ion transport	0.083519785	0.093733062	0	0	1	288
GO:0070663 regulation of leukocyte proliferation	1	0.083799314	16.667	0.003	Biological Process	GO:0070663	regulation of leukocyte proliferation	0.083799314	0.093993062	0	0	1	289
GO:0000082 G1/S transition of mitotic cell cycle	1	0.084078771	16.667	0.003	Biological Process	GO:0000082	G1/S transition of mitotic cell cycle	0.084078771	0.094252686	0	0	1	290
GO:0098656 anion transmembrane transport	1	0.084358157	16.667	0.003	Biological Process	GO:0098656	anion transmembrane transport	0.084358157	0.094511934	0	0	1	291
GO:0001822 kidney development	1	0.084637472	16.667	0.003	Biological Process	GO:0001822	kidney development	0.084637472	0.094716807	0	0	1	292
GO:0010976 positive regulation of neuron projection development	1	0.084637472	16.667	0.003	Biological Process	GO:0010976	positive regulation of neuron projection development	0.084637472	0.094716807	0	0	1	292
GO:0021700 developmental maturation	1	0.08519589	16.667	0.003	Biological Process	GO:0021700	developmental maturation	0.08519589	0.095233197	0	0	1	294
GO:0050663 cytokine secretion	1	0.08519589	16.667	0.003	Biological Process	GO:0050663	cytokine secretion	0.08519589	0.095233197	0	0	1	294
GO:0120111 neuron projection cytoplasm	1	0.023762937	16.667	0.012	Cellular Component	GO:0120111	neuron projection cytoplasm	0.023762937	0.095677088	0	0	1	85
GO:0072593 reactive oxygen species metabolic process	1	0.085754023	16.667	0.003	Biological Process	GO:0072593	reactive oxygen species metabolic process	0.085754023	0.095802561	0	0	1	296
GO:0016054 organic acid catabolic process	1	0.086032984	16.667	0.003	Biological Process	GO:0016054	organic acid catabolic process	0.086032984	0.096004989	0	0	1	297
GO:0046395 carboxylic acid catabolic process	1	0.086032984	16.667	0.003	Biological Process	GO:0046395	carboxylic acid catabolic process	0.086032984	0.096004989	0	0	1	297
GO:0005773 vacuole	2	0.024543081	33.333	0.002	Cellular Component	GO:0005773	vacuole	0.024543081	0.096169062	0	0	2	911
GO:0031234 extrinsic component of cytoplasmic side of plasma membrane	1	0.02625122	16.667	0.011	Cellular Component	GO:0031234	extrinsic component of cytoplasmic side of plasma membrane	0.02625122	0.096169062	0	0	1	94
GO:0030141 secretory granule	2	0.026348161	33.333	0.002	Cellular Component	GO:0030141	secretory granule	0.026348161	0.096169062	0	0	2	946
GO:0032587 ruffle membrane	1	0.027631315	16.667	0.01	Cellular Component	GO:0032587	ruffle membrane	0.027631315	0.096169062	0	0	1	99
GO:0031091 platelet alpha granule	1	0.027907138	16.667	0.01	Cellular Component	GO:0031091	platelet alpha granule	0.027907138	0.096169062	0	0	1	100
GO:0031410 cytoplasmic vesicle	3	0.028197947	50	0.001	Cellular Component	GO:0031410	cytoplasmic vesicle	0.028197947	0.096169062	0	0	3	2625
GO:0097708 intracellular vesicle	3	0.028285018	50	0.001	Cellular Component	GO:0097708	intracellular vesicle	0.028285018	0.096169062	0	0	3	2628
GO:0015980 energy derivation by oxidation of organic compounds	1	0.086311873	16.667	0.003	Biological Process	GO:0015980	energy derivation by oxidation of organic compounds	0.086311873	0.09626151	0	0	1	298
GO:0003015 heart process	1	0.086590692	16.667	0.003	Biological Process	GO:0003015	heart process	0.086590692	0.096462915	0	0	1	299
GO:0048511 rhythmic process	1	0.086590692	16.667	0.003	Biological Process	GO:0048511	rhythmic process	0.086590692	0.096462915	0	0	1	299
GO:0035578 azurophil granule lumen	1	0.029285276	16.667	0.01	Cellular Component	GO:0035578	azurophil granule lumen	0.029285276	0.096857332	0	0	1	105
GO:0012505 endomembrane system	4	0.030104083	66.667	0.001	Cellular Component	GO:0012505	endomembrane system	0.030104083	0.096857332	0	0	4	4989
GO:0005884 actin filament	1	0.030386614	16.667	0.009	Cellular Component	GO:0005884	actin filament	0.030386614	0.096857332	0	0	1	109
GO:0034976 response to endoplasmic reticulum stress	1	0.087148116	16.667	0.003	Biological Process	GO:0034976	response to endoplasmic reticulum stress	0.087148116	0.097028855	0	0	1	301
GO:0050768 negative regulation of neurogenesis	1	0.087426722	16.667	0.003	Biological Process	GO:0050768	negative regulation of neurogenesis	0.087426722	0.097228812	0	0	1	302
GO:0072331 signal transduction by p53 class mediator	1	0.087426722	16.667	0.003	Biological Process	GO:0072331	signal transduction by p53 class mediator	0.087426722	0.097228812	0	0	1	302
GO:0090287 regulation of cellular response to growth factor stimulus	1	0.087705257	16.667	0.003	Biological Process	GO:0090287	regulation of cellular response to growth factor stimulus	0.087705257	0.097483375	0	0	1	303
GO:0048562 embryonic organ morphogenesis	1	0.088262114	16.667	0.003	Biological Process	GO:0048562	embryonic organ morphogenesis	0.088262114	0.098046828	0	0	1	305
GO:0060828 regulation of canonical Wnt signaling pathway	1	0.088818688	16.667	0.003	Biological Process	GO:0060828	regulation of canonical Wnt signaling pathway	0.088818688	0.098609329	0	0	1	307
GO:0072001 renal system development	1	0.089096869	16.667	0.003	Biological Process	GO:0072001	renal system development	0.089096869	0.098862288	0	0	1	308
GO:0010769 regulation of cell morphogenesis involved in differentiation	1	0.089653018	16.667	0.003	Biological Process	GO:0010769	regulation of cell morphogenesis involved in differentiation	0.089653018	0.099367115	0	0	1	310
GO:0044843 cell cycle G1/S phase transition	1	0.089653018	16.667	0.003	Biological Process	GO:0044843	cell cycle G1/S phase transition	0.089653018	0.099367115	0	0	1	310
GO:1903522 regulation of blood circulation	1	0.089930987	16.667	0.003	Biological Process	GO:1903522	regulation of blood circulation	0.089930987	0.099618984	0	0	1	311
GO:0072686 mitotic spindle	1	0.032036668	16.667	0.009	Cellular Component	GO:0072686	mitotic spindle	0.032036668	0.100032863	0	0	1	115
GO:0030522 intracellular receptor signaling pathway	1	0.090764468	16.667	0.003	Biological Process	GO:0030522	intracellular receptor signaling pathway	0.090764468	0.100428966	0	0	1	314
GO:0090068 positive regulation of cell cycle process	1	0.090764468	16.667	0.003	Biological Process	GO:0090068	positive regulation of cell cycle process	0.090764468	0.100428966	0	0	1	314
GO:0005768 endosome	2	0.032835657	33.333	0.002	Cellular Component	GO:0005768	endosome	0.032835657	0.10047711	0	0	2	1064
GO:0043010 camera-type eye development	1	0.09215219	16.667	0.003	Biological Process	GO:0043010	camera-type eye development	0.09215219	0.101907039	0	0	1	319
GO:0051961 negative regulation of nervous system development	1	0.092983975	16.667	0.003	Biological Process	GO:0051961	negative regulation of nervous system development	0.092983975	0.102769008	0	0	1	322
GO:0009416 response to light stimulus	1	0.093538146	16.667	0.003	Biological Process	GO:0009416	response to light stimulus	0.093538146	0.103323352	0	0	1	324
GO:0050890 cognition	1	0.093815126	16.667	0.003	Biological Process	GO:0050890	cognition	0.093815126	0.103571055	0	0	1	325
GO:0009895 negative regulation of catabolic process	1	0.095752009	16.667	0.003	Biological Process	GO:0009895	negative regulation of catabolic process	0.095752009	0.105649969	0	0	1	332
GO:1990778 protein localization to cell periphery	1	0.09630477	16.667	0.003	Biological Process	GO:1990778	protein localization to cell periphery	0.09630477	0.106200207	0	0	1	334
GO:0099503 secretory vesicle	2	0.035408676	33.333	0.002	Cellular Component	GO:0099503	secretory vesicle	0.035408676	0.106226027	0	0	2	1108
GO:0070372 regulation of ERK1 and ERK2 cascade	1	0.097133383	16.667	0.003	Biological Process	GO:0070372	regulation of ERK1 and ERK2 cascade	0.097133383	0.107053852	0	0	1	337
GO:0010506 regulation of autophagy	1	0.097961364	16.667	0.003	Biological Process	GO:0010506	regulation of autophagy	0.097961364	0.107905843	0	0	1	340
GO:0001818 negative regulation of cytokine production	1	0.098237217	16.667	0.003	Biological Process	GO:0001818	negative regulation of cytokine production	0.098237217	0.107967484	0	0	1	341
GO:0046651 lymphocyte proliferation	1	0.098237217	16.667	0.003	Biological Process	GO:0046651	lymphocyte proliferation	0.098237217	0.107967484	0	0	1	341
GO:0071214 cellular response to abiotic stimulus	1	0.098237217	16.667	0.003	Biological Process	GO:0071214	cellular response to abiotic stimulus	0.098237217	0.107967484	0	0	1	341
GO:0104004 cellular response to environmental stimulus	1	0.098237217	16.667	0.003	Biological Process	GO:0104004	cellular response to environmental stimulus	0.098237217	0.107967484	0	0	1	341
GO:0032943 mononuclear cell proliferation	1	0.098788711	16.667	0.003	Biological Process	GO:0032943	mononuclear cell proliferation	0.098788711	0.10851288	0	0	1	343
GO:0015849 organic acid transport	1	0.099064353	16.667	0.003	Biological Process	GO:0015849	organic acid transport	0.099064353	0.108694072	0	0	1	344
GO:0046942 carboxylic acid transport	1	0.099064353	16.667	0.003	Biological Process	GO:0046942	carboxylic acid transport	0.099064353	0.108694072	0	0	1	344
GO:0046879 hormone secretion	1	0.099615426	16.667	0.003	Biological Process	GO:0046879	hormone secretion	0.099615426	0.109237687	0	0	1	346
GO:0001655 urogenital system development	1	0.099890857	16.667	0.003	Biological Process	GO:0001655	urogenital system development	0.099890857	0.109478596	0	0	1	347
GO:0036064 ciliary basal body	1	0.037246411	16.667	0.007	Cellular Component	GO:0036064	ciliary basal body	0.037246411	0.109590402	0	0	1	134
GO:0001664 G protein-coupled receptor binding	1	0.090573034	16.667	0.003	Molecular Function	GO:0001664	G protein-coupled receptor binding	0.090573034	0.111247314	0	0	1	317
GO:0002758 innate immune response-activating signal transduction	1	0.101816911	16.667	0.003	Biological Process	GO:0002758	innate immune response-activating signal transduction	0.101816911	0.11152728	0	0	1	354
GO:0010721 negative regulation of cell development	1	0.10209178	16.667	0.003	Biological Process	GO:0010721	negative regulation of cell development	0.10209178	0.111703764	0	0	1	355
GO:0030336 negative regulation of cell migration	1	0.10209178	16.667	0.003	Biological Process	GO:0030336	negative regulation of cell migration	0.10209178	0.111703764	0	0	1	355
GO:0043204 perikaryon	1	0.03915989	16.667	0.007	Cellular Component	GO:0043204	perikaryon	0.03915989	0.111726792	0	0	1	141
GO:1904813 ficolin-1-rich granule lumen	1	0.039432985	16.667	0.007	Cellular Component	GO:1904813	ficolin-1-rich granule lumen	0.039432985	0.111726792	0	0	1	142
GO:0009914 hormone transport	1	0.10264131	16.667	0.003	Biological Process	GO:0009914	hormone transport	0.10264131	0.11218004	0	0	1	357
GO:0051056 regulation of small GTPase mediated signal transduction	1	0.10264131	16.667	0.003	Biological Process	GO:0051056	regulation of small GTPase mediated signal transduction	0.10264131	0.11218004	0	0	1	357
GO:0060070 canonical Wnt signaling pathway	1	0.103190559	16.667	0.003	Biological Process	GO:0060070	canonical Wnt signaling pathway	0.103190559	0.112717607	0	0	1	359
GO:1903311 regulation of mRNA metabolic process	1	0.104013907	16.667	0.003	Biological Process	GO:1903311	regulation of mRNA metabolic process	0.104013907	0.113553816	0	0	1	362
GO:0070661 leukocyte proliferation	1	0.104836626	16.667	0.003	Biological Process	GO:0070661	leukocyte proliferation	0.104836626	0.114324893	0	0	1	365
GO:1901214 regulation of neuron death	1	0.104836626	16.667	0.003	Biological Process	GO:1901214	regulation of neuron death	0.104836626	0.114324893	0	0	1	365
GO:0031625 ubiquitin protein ligase binding	1	0.094136186	16.667	0.003	Molecular Function	GO:0031625	ubiquitin protein ligase binding	0.094136186	0.114380527	0	0	1	330
GO:0016042 lipid catabolic process	1	0.105384755	16.667	0.003	Biological Process	GO:0016042	lipid catabolic process	0.105384755	0.114858856	0	0	1	367
GO:0001654 eye development	1	0.105658715	16.667	0.003	Biological Process	GO:0001654	eye development	0.105658715	0.115093575	0	0	1	368
GO:0030098 lymphocyte differentiation	1	0.106480174	16.667	0.003	Biological Process	GO:0030098	lymphocyte differentiation	0.106480174	0.115924092	0	0	1	371
GO:0150063 visual system development	1	0.106753854	16.667	0.003	Biological Process	GO:0150063	visual system development	0.106753854	0.116093339	0	0	1	372
GO:2000146 negative regulation of cell motility	1	0.106753854	16.667	0.003	Biological Process	GO:2000146	negative regulation of cell motility	0.106753854	0.116093339	0	0	1	372
GO:0042113 B cell activation	1	0.107027464	16.667	0.003	Biological Process	GO:0042113	B cell activation	0.107027464	0.116326475	0	0	1	373
GO:0002218 activation of innate immune response	1	0.107301005	16.667	0.003	Biological Process	GO:0002218	activation of innate immune response	0.107301005	0.116494844	0	0	1	374
GO:0007178 transmembrane receptor protein serine/threonine kinase signaling pathway	1	0.107301005	16.667	0.003	Biological Process	GO:0007178	transmembrane receptor protein serine/threonine kinase signaling pathway	0.107301005	0.116494844	0	0	1	374
GO:0045296 cadherin binding	1	0.097960407	16.667	0.003	Molecular Function	GO:0045296	cadherin binding	0.097960407	0.117760915	0	0	1	344
GO:0044389 ubiquitin-like protein ligase binding	1	0.099050568	16.667	0.003	Molecular Function	GO:0044389	ubiquitin-like protein ligase binding	0.099050568	0.117818044	0	0	1	348
GO:0002440 production of molecular mediator of immune response	1	0.108667659	16.667	0.003	Biological Process	GO:0002440	production of molecular mediator of immune response	0.108667659	0.117913416	0	0	1	379
GO:0001505 regulation of neurotransmitter levels	1	0.108940781	16.667	0.003	Biological Process	GO:0001505	regulation of neurotransmitter levels	0.108940781	0.118079301	0	0	1	380
GO:0030111 regulation of Wnt signaling pathway	1	0.108940781	16.667	0.003	Biological Process	GO:0030111	regulation of Wnt signaling pathway	0.108940781	0.118079301	0	0	1	380
GO:0009898 cytoplasmic side of plasma membrane	1	0.044881322	16.667	0.006	Cellular Component	GO:0009898	cytoplasmic side of plasma membrane	0.044881322	0.118364122	0	0	1	162
GO:0015630 microtubule cytoskeleton	2	0.04550161	33.333	0.002	Cellular Component	GO:0015630	microtubule cytoskeleton	0.04550161	0.118364122	0	0	2	1269
GO:0098590 plasma membrane region	2	0.046096193	33.333	0.002	Cellular Component	GO:0098590	plasma membrane region	0.046096193	0.118364122	0	0	2	1278
GO:0005766 primary lysosome	1	0.047053434	16.667	0.006	Cellular Component	GO:0005766	primary lysosome	0.047053434	0.118364122	0	0	1	170
GO:0042582 azurophil granule	1	0.047053434	16.667	0.006	Cellular Component	GO:0042582	azurophil granule	0.047053434	0.118364122	0	0	1	170
GO:0019897 extrinsic component of plasma membrane	1	0.048408912	16.667	0.006	Cellular Component	GO:0019897	extrinsic component of plasma membrane	0.048408912	0.118364122	0	0	1	175
GO:0001726 ruffle	1	0.050033365	16.667	0.006	Cellular Component	GO:0001726	ruffle	0.050033365	0.118364122	0	0	1	181
GO:0031974 membrane-enclosed lumen	4	0.050479704	66.667	0.001	Cellular Component	GO:0031974	membrane-enclosed lumen	0.050479704	0.118364122	0	0	4	5783
GO:0043233 organelle lumen	4	0.050479704	66.667	0.001	Cellular Component	GO:0043233	organelle lumen	0.050479704	0.118364122	0	0	4	5783
GO:0070013 intracellular organelle lumen	4	0.050479704	66.667	0.001	Cellular Component	GO:0070013	intracellular organelle lumen	0.050479704	0.118364122	0	0	4	5783
GO:0031256 leading edge membrane	1	0.050844725	16.667	0.005	Cellular Component	GO:0031256	leading edge membrane	0.050844725	0.118364122	0	0	1	184
GO:0043005 neuron projection	2	0.052420742	33.333	0.001	Cellular Component	GO:0043005	neuron projection	0.052420742	0.118364122	0	0	2	1371
GO:0098562 cytoplasmic side of membrane	1	0.052465711	16.667	0.005	Cellular Component	GO:0098562	cytoplasmic side of membrane	0.052465711	0.118364122	0	0	1	190
GO:0044459 plasma membrane part	3	0.054980573	50	0.001	Cellular Component	GO:0044459	plasma membrane part	0.054980573	0.118364122	0	0	3	3376
GO:0005775 vacuolar lumen	1	0.055431528	16.667	0.005	Cellular Component	GO:0005775	vacuolar lumen	0.055431528	0.118364122	0	0	1	201
GO:0098802 plasma membrane receptor complex	1	0.055431528	16.667	0.005	Cellular Component	GO:0098802	plasma membrane receptor complex	0.055431528	0.118364122	0	0	1	201
GO:0030054 cell junction	2	0.055453665	33.333	0.001	Cellular Component	GO:0030054	cell junction	0.055453665	0.118364122	0	0	2	1414
GO:0032838 plasma membrane bounded cell projection cytoplasm	1	0.055700763	16.667	0.005	Cellular Component	GO:0032838	plasma membrane bounded cell projection cytoplasm	0.055700763	0.118364122	0	0	1	202
GO:0019058 viral life cycle	1	0.109486815	16.667	0.003	Biological Process	GO:0019058	viral life cycle	0.109486815	0.118605684	0	0	1	382
GO:0048880 sensory system development	1	0.109759727	16.667	0.003	Biological Process	GO:0048880	sensory system development	0.109759727	0.11883578	0	0	1	383
GO:0006869 lipid transport	1	0.11085068	16.667	0.003	Biological Process	GO:0006869	lipid transport	0.11085068	0.119884766	0	0	1	387
GO:0045666 positive regulation of neuron differentiation	1	0.11085068	16.667	0.003	Biological Process	GO:0045666	positive regulation of neuron differentiation	0.11085068	0.119884766	0	0	1	387
GO:0043687 post-translational protein modification	1	0.112212804	16.667	0.003	Biological Process	GO:0043687	post-translational protein modification	0.112212804	0.12129111	0	0	1	392
GO:0065007 biological regulation	6	0.112649169	100	0	Biological Process	GO:0065007	biological regulation	0.112649169	0.121678613	0	0	6	13872
GO:0016485 protein processing	1	0.112757167	16.667	0.003	Biological Process	GO:0016485	protein processing	0.112757167	0.121678613	0	0	1	394
GO:0031331 positive regulation of cellular catabolic process	1	0.112757167	16.667	0.003	Biological Process	GO:0031331	positive regulation of cellular catabolic process	0.112757167	0.121678613	0	0	1	394
GO:0030198 extracellular matrix organization	1	0.113029244	16.667	0.003	Biological Process	GO:0030198	extracellular matrix organization	0.113029244	0.121838328	0	0	1	395
GO:0051260 protein homooligomerization	1	0.113029244	16.667	0.003	Biological Process	GO:0051260	protein homooligomerization	0.113029244	0.121838328	0	0	1	395
GO:0032991 protein-containing complex	4	0.058285914	66.667	0.001	Cellular Component	GO:0032991	protein-containing complex	0.058285914	0.122160888	0	0	4	6030
GO:0043167 ion binding	4	0.104882994	66.667	0.001	Molecular Function	GO:0043167	ion binding	0.104882994	0.123456025	0	0	4	6828
GO:0070997 neuron death	1	0.114660245	16.667	0.002	Biological Process	GO:0070997	neuron death	0.114660245	0.123528646	0	0	1	401
GO:0006631 fatty acid metabolic process	1	0.115203357	16.667	0.002	Biological Process	GO:0006631	fatty acid metabolic process	0.115203357	0.12404572	0	0	1	403
GO:0005515 protein binding	6	0.107023166	100	0	Molecular Function	GO:0005515	protein binding	0.107023166	0.124676472	0	0	6	13916
GO:0051271 negative regulation of cellular component movement	1	0.116017504	16.667	0.002	Biological Process	GO:0051271	negative regulation of cellular component movement	0.116017504	0.124853905	0	0	1	406
GO:0030900 forebrain development	1	0.117373028	16.667	0.002	Biological Process	GO:0030900	forebrain development	0.117373028	0.126243497	0	0	1	411
GO:0009165 nucleotide biosynthetic process	1	0.117643924	16.667	0.002	Biological Process	GO:0009165	nucleotide biosynthetic process	0.117643924	0.126465609	0	0	1	412
GO:0101002 ficolin-1-rich granule	1	0.061339958	16.667	0.004	Cellular Component	GO:0101002	ficolin-1-rich granule	0.061339958	0.126824507	0	0	1	223
GO:1901293 nucleoside phosphate biosynthetic process	1	0.118997369	16.667	0.002	Biological Process	GO:1901293	nucleoside phosphate biosynthetic process	0.118997369	0.127850565	0	0	1	417
[truncated: 231 more rows]
