# Supplementary material for: Evaluation of the Mechanism of Jiedu Huazhuo Quyu Formula in Treating Wilson's Disease-Associated Liver Fibrosis by Network Pharmacology Analysis and Molecular Dynamics Simulation
Source: Evid Based Complement Alternat Med. 2022 Jun 6;2022:9363131. doi: 10.1155/2022/9363131 (PMC9192323; doi:10.1155/2022/9363131)
Supplement: Supplementary Materials — Supplementary Table 1. Details for each antibody. Supplementary Table 2. Details for compound-putative target network. Supplementary Table 3. Enrichment analysis results of 113 genes. Supplementary Table 4. MCODE and CytoNCA analysis. Supplementary Table 5. Enrichment analysis results of 6 core genes. Supplementary Table 6. Molecular docking results. [file 9363131.f1.zip › 9363131.f1/Supplementary Table 5 KEGG.txt]

id	num	pvalue	per	ratio	class	ID	Descrption	Pvalue	Qvalue	Up	Down	fg_num	bg_num
EGFR tyrosine kinase inhibitor resistance	5	4.36E-10	83.333	0.061	Human Diseases	ko01521	EGFR tyrosine kinase inhibitor resistance	4.36E-10	3.48E-08	0	0	5	82
Kaposi sarcoma-associated herpesvirus infection	6	4.84E-10	100	0.025	Human Diseases	ko05167	Kaposi sarcoma-associated herpesvirus infection	4.84E-10	3.48E-08	0	0	6	241
Human cytomegalovirus infection	6	2.10E-09	100	0.02	Human Diseases	ko05163	Human cytomegalovirus infection	2.10E-09	8.42E-08	0	0	6	307
AGE-RAGE signaling pathway in diabetic complications	5	2.34E-09	83.333	0.044	Human Diseases	ko04933	AGE-RAGE signaling pathway in diabetic complications	2.34E-09	8.42E-08	0	0	5	114
Bladder cancer	4	8.40E-09	66.667	0.093	Human Diseases	ko05219	Bladder cancer	8.40E-09	2.42E-07	0	0	4	43
Hepatitis B	5	1.30E-08	83.333	0.031	Human Diseases	ko05161	Hepatitis B	1.30E-08	3.12E-07	0	0	5	160
VEGF signaling pathway	4	3.54E-08	66.667	0.066	Environmental Information Processing	ko04370	VEGF signaling pathway	3.54E-08	7.28E-07	0	0	4	61
HIF-1 signaling pathway	4	2.86E-07	66.667	0.039	Environmental Information Processing	ko04066	HIF-1 signaling pathway	2.86E-07	5.15E-06	0	0	4	102
C-type lectin receptor signaling pathway	4	4.81E-07	66.667	0.034	Organismal Systems	ko04625	C-type lectin receptor signaling pathway	4.81E-07	6.92E-06	0	0	4	116
Chagas disease (American trypanosomiasis)	4	4.81E-07	66.667	0.034	Human Diseases	ko05142	Chagas disease (American trypanosomiasis)	4.81E-07	6.92E-06	0	0	4	116
Toll-like receptor signaling pathway	4	5.89E-07	66.667	0.033	Organismal Systems	ko04620	Toll-like receptor signaling pathway	5.89E-07	7.71E-06	0	0	4	122
Relaxin signaling pathway	4	9.67E-07	66.667	0.029	Organismal Systems	ko04926	Relaxin signaling pathway	9.67E-07	1.16E-05	0	0	4	138
Chemokine signaling pathway	4	4.90E-06	66.667	0.019	Organismal Systems	ko04062	Chemokine signaling pathway	4.90E-06	4.85E-05	0	0	4	207
Proteoglycans in cancer	4	5.19E-06	66.667	0.019	Human Diseases	ko05205	Proteoglycans in cancer	5.19E-06	4.85E-05	0	0	4	210
Rap1 signaling pathway	4	5.29E-06	66.667	0.019	Environmental Information Processing	ko04015	Rap1 signaling pathway	5.29E-06	4.85E-05	0	0	4	211
Focal adhesion	4	5.39E-06	66.667	0.019	Cellular Processes	ko04510	Focal adhesion	5.39E-06	4.85E-05	0	0	4	212
Pathways in cancer	5	6.28E-06	83.333	0.009	Human Diseases	ko05200	Pathways in cancer	6.28E-06	5.32E-05	0	0	5	550
Shigellosis	3	8.75E-06	50	0.045	Human Diseases	ko05131	Shigellosis	8.75E-06	7.00E-05	0	0	3	66
Renal cell carcinoma	3	1.09E-05	50	0.042	Human Diseases	ko05211	Renal cell carcinoma	1.09E-05	8.28E-05	0	0	3	71
Tuberculosis	4	1.20E-05	66.667	0.015	Human Diseases	ko05152	Tuberculosis	1.20E-05	8.48E-05	0	0	4	259
Prolactin signaling pathway	3	1.24E-05	50	0.041	Organismal Systems	ko04917	Prolactin signaling pathway	1.24E-05	8.48E-05	0	0	3	74
Pancreatic cancer	3	1.40E-05	50	0.039	Human Diseases	ko05212	Pancreatic cancer	1.40E-05	9.13E-05	0	0	3	77
Influenza A	4	1.56E-05	66.667	0.014	Human Diseases	ko05164	Influenza A	1.56E-05	9.78E-05	0	0	4	277
ErbB signaling pathway	3	2.02E-05	50	0.034	Environmental Information Processing	ko04012	ErbB signaling pathway	2.02E-05	1.21E-04	0	0	3	87
Pertussis	3	2.39E-05	50	0.033	Human Diseases	ko05133	Pertussis	2.39E-05	1.37E-04	0	0	3	92
Salmonella infection	3	2.80E-05	50	0.031	Human Diseases	ko05132	Salmonella infection	2.80E-05	1.55E-04	0	0	3	97
Cellular senescence	4	3.05E-05	66.667	0.012	Cellular Processes	ko04218	Cellular senescence	3.05E-05	1.63E-04	0	0	4	328
IL-17 signaling pathway	3	3.65E-05	50	0.028	Organismal Systems	ko04657	IL-17 signaling pathway	3.65E-05	1.88E-04	0	0	3	106
Endocrine resistance	3	4.78E-05	50	0.026	Human Diseases	ko01522	Endocrine resistance	4.78E-05	2.38E-04	0	0	3	116
PI3K-Akt signaling pathway	4	5.12E-05	66.667	0.011	Environmental Information Processing	ko04151	PI3K-Akt signaling pathway	5.12E-05	2.46E-04	0	0	4	374
TNF signaling pathway	3	6.73E-05	50	0.023	Environmental Information Processing	ko04668	TNF signaling pathway	6.73E-05	3.10E-04	0	0	3	130
Thyroid hormone signaling pathway	3	6.88E-05	50	0.023	Organismal Systems	ko04919	Thyroid hormone signaling pathway	6.88E-05	3.10E-04	0	0	3	131
Platelet activation	3	7.53E-05	50	0.022	Organismal Systems	ko04611	Platelet activation	7.53E-05	3.29E-04	0	0	3	135
FoxO signaling pathway	3	8.22E-05	50	0.022	Environmental Information Processing	ko04068	FoxO signaling pathway	8.22E-05	3.48E-04	0	0	3	139
Hepatitis C	3	9.13E-05	50	0.021	Human Diseases	ko05160	Hepatitis C	9.13E-05	3.76E-04	0	0	3	144
Fluid shear stress and atherosclerosis	3	0.000101086	50	0.02	Human Diseases	ko05418	Fluid shear stress and atherosclerosis	0.000101086	4.04E-04	0	0	3	149
Phospholipase D signaling pathway	3	0.000118127	50	0.019	Environmental Information Processing	ko04072	Phospholipase D signaling pathway	0.000118127	4.60E-04	0	0	3	157
Estrogen signaling pathway	3	0.0001523	50	0.018	Organismal Systems	ko04915	Estrogen signaling pathway	0.0001523	5.77E-04	0	0	3	171
Non-alcoholic fatty liver disease (NAFLD)	3	0.000171577	50	0.017	Human Diseases	ko04932	Non-alcoholic fatty liver disease (NAFLD)	0.000171577	6.34E-04	0	0	3	178
Rheumatoid arthritis	3	0.000201791	50	0.016	Human Diseases	ko05323	Rheumatoid arthritis	0.000201791	7.26E-04	0	0	3	188
NOD-like receptor signaling pathway	3	0.000218121	50	0.016	Organismal Systems	ko04621	NOD-like receptor signaling pathway	0.000218121	7.66E-04	0	0	3	193
Prion diseases	2	0.000319024	33.333	0.05	Human Diseases	ko05020	Prion diseases	0.000319024	1.09E-03	0	0	2	40
Ras signaling pathway	3	0.000430932	50	0.012	Environmental Information Processing	ko04014	Ras signaling pathway	0.000430932	1.44E-03	0	0	3	243
Malaria	2	0.000604519	33.333	0.036	Human Diseases	ko05144	Malaria	0.000604519	1.98E-03	0	0	2	55
Endometrial cancer	2	0.00074356	33.333	0.033	Human Diseases	ko05213	Endometrial cancer	0.00074356	2.38E-03	0	0	2	61
Acute myeloid leukemia	2	0.000923556	33.333	0.029	Human Diseases	ko05221	Acute myeloid leukemia	0.000923556	2.89E-03	0	0	2	68
Central carbon metabolism in cancer	2	0.000950826	33.333	0.029	Human Diseases	ko05230	Central carbon metabolism in cancer	0.000950826	2.91E-03	0	0	2	69
MAPK signaling pathway	3	0.001076477	50	0.009	Environmental Information Processing	ko04010	MAPK signaling pathway	0.001076477	3.13E-03	0	0	3	332
B cell receptor signaling pathway	2	0.001092987	33.333	0.027	Organismal Systems	ko04662	B cell receptor signaling pathway	0.001092987	3.13E-03	0	0	2	74
Non-small cell lung cancer	2	0.001092987	33.333	0.027	Human Diseases	ko05223	Non-small cell lung cancer	0.001092987	3.13E-03	0	0	2	74
Glioma	2	0.001122579	33.333	0.027	Human Diseases	ko05214	Glioma	0.001122579	3.13E-03	0	0	2	75
Platinum drug resistance	2	0.001152556	33.333	0.026	Human Diseases	ko01524	Platinum drug resistance	0.001152556	3.13E-03	0	0	2	76
Melanoma	2	0.001152556	33.333	0.026	Human Diseases	ko05218	Melanoma	0.001152556	3.13E-03	0	0	2	76
Legionellosis	2	0.001182919	33.333	0.026	Human Diseases	ko05134	Legionellosis	0.001182919	3.14E-03	0	0	2	77
Epithelial cell signaling in Helicobacter pylori infection	2	0.001213667	33.333	0.026	Human Diseases	ko05120	Epithelial cell signaling in Helicobacter pylori infection	0.001213667	3.14E-03	0	0	2	78
Fc epsilon RI signaling pathway	2	0.001244799	33.333	0.025	Organismal Systems	ko04664	Fc epsilon RI signaling pathway	0.001244799	3.14E-03	0	0	2	79
Chronic myeloid leukemia	2	0.001244799	33.333	0.025	Human Diseases	ko05220	Chronic myeloid leukemia	0.001244799	3.14E-03	0	0	2	79
Adherens junction	2	0.001276315	33.333	0.025	Cellular Processes	ko04520	Adherens junction	0.001276315	3.17E-03	0	0	2	80
Colorectal cancer	2	0.001542232	33.333	0.023	Human Diseases	ko05210	Colorectal cancer	0.001542232	3.76E-03	0	0	2	88
Fc gamma R-mediated phagocytosis	2	0.00179491	33.333	0.021	Organismal Systems	ko04666	Fc gamma R-mediated phagocytosis	0.00179491	4.31E-03	0	0	2	95
GnRH signaling pathway	2	0.001832523	33.333	0.021	Organismal Systems	ko04912	GnRH signaling pathway	0.001832523	4.33E-03	0	0	2	96
Gap junction	2	0.001908881	33.333	0.02	Cellular Processes	ko04540	Gap junction	0.001908881	4.43E-03	0	0	2	98
Prostate cancer	2	0.002026247	33.333	0.02	Human Diseases	ko05215	Prostate cancer	0.002026247	4.63E-03	0	0	2	101
Human papillomavirus infection	3	0.002073681	50	0.007	Human Diseases	ko05165	Human papillomavirus infection	0.002073681	4.67E-03	0	0	3	416
Progesterone-mediated oocyte maturation	2	0.002187996	33.333	0.019	Organismal Systems	ko04914	Progesterone-mediated oocyte maturation	0.002187996	4.85E-03	0	0	2	105
Amoebiasis	2	0.002229371	33.333	0.019	Human Diseases	ko05146	Amoebiasis	0.002229371	4.86E-03	0	0	2	106
Choline metabolism in cancer	2	0.002355739	33.333	0.018	Human Diseases	ko05231	Choline metabolism in cancer	0.002355739	5.06E-03	0	0	2	109
T cell receptor signaling pathway	2	0.002573808	33.333	0.018	Organismal Systems	ko04660	T cell receptor signaling pathway	0.002573808	5.45E-03	0	0	2	114
Cholinergic synapse	2	0.002894687	33.333	0.017	Organismal Systems	ko04725	Cholinergic synapse	0.002894687	6.04E-03	0	0	2	121
Insulin resistance	2	0.002942004	33.333	0.016	Human Diseases	ko04931	Insulin resistance	0.002942004	6.05E-03	0	0	2	122
Neurotrophin signaling pathway	2	0.003037744	33.333	0.016	Organismal Systems	ko04722	Neurotrophin signaling pathway	0.003037744	6.16E-03	0	0	2	124
Sphingolipid signaling pathway	2	0.003435376	33.333	0.015	Environmental Information Processing	ko04071	Sphingolipid signaling pathway	0.003435376	6.87E-03	0	0	2	132
Autophagy - animal	2	0.003486725	33.333	0.015	Cellular Processes	ko04140	Autophagy - animal	0.003486725	6.88E-03	0	0	2	133
Apelin signaling pathway	2	0.003910601	33.333	0.014	Environmental Information Processing	ko04371	Apelin signaling pathway	0.003910601	7.61E-03	0	0	2	141
Signaling pathways regulating pluripotency of stem cells	2	0.004415101	33.333	0.013	Cellular Processes	ko04550	Signaling pathways regulating pluripotency of stem cells	0.004415101	8.48E-03	0	0	2	150
Apoptosis	2	0.004589728	33.333	0.013	Cellular Processes	ko04210	Apoptosis	0.004589728	8.58E-03	0	0	2	153
Insulin signaling pathway	2	0.004589728	33.333	0.013	Organismal Systems	ko04910	Insulin signaling pathway	0.004589728	8.58E-03	0	0	2	153
Adrenergic signaling in cardiomyocytes	2	0.004648651	33.333	0.013	Organismal Systems	ko04261	Adrenergic signaling in cardiomyocytes	0.004648651	8.58E-03	0	0	2	154
Measles	2	0.004707932	33.333	0.013	Human Diseases	ko05162	Measles	0.004707932	8.58E-03	0	0	2	155
Oxytocin signaling pathway	2	0.00488791	33.333	0.013	Organismal Systems	ko04921	Oxytocin signaling pathway	0.00488791	8.80E-03	0	0	2	158
Gastric cancer	2	0.005071086	33.333	0.012	Human Diseases	ko05226	Gastric cancer	0.005071086	9.01E-03	0	0	2	161
Breast cancer	2	0.005132853	33.333	0.012	Human Diseases	ko05224	Breast cancer	0.005132853	9.01E-03	0	0	2	162
Jak-STAT signaling pathway	2	0.005446992	33.333	0.012	Environmental Information Processing	ko04630	Jak-STAT signaling pathway	0.005446992	9.45E-03	0	0	2	167
MicroRNAs in cancer	2	0.005510878	33.333	0.012	Human Diseases	ko05206	MicroRNAs in cancer	0.005510878	9.45E-03	0	0	2	168
cGMP - PKG signaling pathway	2	0.005769934	33.333	0.012	Environmental Information Processing	ko04022	cGMP - PKG signaling pathway	0.005769934	9.66E-03	0	0	2	172
mTOR signaling pathway	2	0.005769934	33.333	0.012	Environmental Information Processing	ko04150	mTOR signaling pathway	0.005769934	9.66E-03	0	0	2	172
Hepatocellular carcinoma	2	0.00616902	33.333	0.011	Human Diseases	ko05225	Hepatocellular carcinoma	0.00616902	1.02E-02	0	0	2	178
Axon guidance	2	0.006236755	33.333	0.011	Organismal Systems	ko04360	Axon guidance	0.006236755	1.02E-02	0	0	2	179
Th17 cell differentiation	2	0.006720622	33.333	0.011	Organismal Systems	ko04659	Th17 cell differentiation	0.006720622	1.09E-02	0	0	2	186
Osteoclast differentiation	2	0.00679113	33.333	0.011	Organismal Systems	ko04380	Osteoclast differentiation	0.00679113	1.09E-02	0	0	2	187
Transcriptional misregulation in cancers	2	0.007367586	33.333	0.01	Human Diseases	ko05202	Transcriptional misregulation in cancers	0.007367586	1.17E-02	0	0	2	195
Toxoplasmosis	2	0.00827328	33.333	0.01	Human Diseases	ko05145	Toxoplasmosis	0.00827328	1.29E-02	0	0	2	207
cAMP signaling pathway	2	0.00835096	33.333	0.01	Environmental Information Processing	ko04024	cAMP signaling pathway	0.00835096	1.29E-02	0	0	2	208
Regulation of actin cytoskeleton	2	0.009146274	33.333	0.009	Cellular Processes	ko04810	Regulation of actin cytoskeleton	0.009146274	1.40E-02	0	0	2	218
Viral carcinogenesis	2	0.01303807	33.333	0.008	Human Diseases	ko05203	Viral carcinogenesis	0.01303807	1.98E-02	0	0	2	262
Cytokine-cytokine receptor interaction	2	0.02025798	33.333	0.006	Environmental Information Processing	ko04060	Cytokine-cytokine receptor interaction	0.02025798	3.04E-02	0	0	2	330
Aldosterone-regulated sodium reabsorption	1	0.02580054	16.667	0.027	Organismal Systems	ko04960	Aldosterone-regulated sodium reabsorption	0.02580054	3.83E-02	0	0	1	37
HTLV-I infection	2	0.02723847	33.333	0.005	Human Diseases	ko05166	HTLV-I infection	0.02723847	4.00E-02	0	0	2	386
Antifolate resistance	1	0.02786793	16.667	0.025	Human Diseases	ko01523	Antifolate resistance	0.02786793	4.05E-02	0	0	1	40
African trypanosomiasis	1	0.02924416	16.667	0.024	Human Diseases	ko05143	African trypanosomiasis	0.02924416	4.21E-02	0	0	1	42
Thyroid cancer	1	0.02993166	16.667	0.023	Human Diseases	ko05216	Thyroid cancer	0.02993166	4.27E-02	0	0	1	43
Carbohydrate digestion and absorption	1	0.03404817	16.667	0.02	Organismal Systems	ko04973	Carbohydrate digestion and absorption	0.03404817	4.81E-02	0	0	1	49
Regulation of lipolysis in adipocyte	1	0.03883236	16.667	0.018	Organismal Systems	ko04923	Regulation of lipolysis in adipocyte	0.03883236	5.38E-02	0	0	1	56
Type II diabetes mellitus	1	0.03883236	16.667	0.018	Human Diseases	ko04930	Type II diabetes mellitus	0.03883236	5.38E-02	0	0	1	56
Long-term depression	1	0.0415573	16.667	0.017	Organismal Systems	ko04730	Long-term depression	0.0415573	5.70E-02	0	0	1	60
Long-term potentiation	1	0.04834151	16.667	0.014	Organismal Systems	ko04720	Long-term potentiation	0.04834151	6.57E-02	0	0	1	70
Cytosolic DNA-sensing pathway	1	0.04969354	16.667	0.014	Organismal Systems	ko04623	Cytosolic DNA-sensing pathway	0.04969354	6.69E-02	0	0	1	72
