# Supplementary material for: Evaluation of the Mechanism of Jiedu Huazhuo Quyu Formula in Treating Wilson's Disease-Associated Liver Fibrosis by Network Pharmacology Analysis and Molecular Dynamics Simulation
Source: Evid Based Complement Alternat Med. 2022 Jun 6;2022:9363131. doi: 10.1155/2022/9363131 (PMC9192323; doi:10.1155/2022/9363131)
Supplement: Supplementary Materials — Supplementary Table 1. Details for each antibody. Supplementary Table 2. Details for compound-putative target network. Supplementary Table 3. Enrichment analysis results of 113 genes. Supplementary Table 4. MCODE and CytoNCA analysis. Supplementary Table 5. Enrichment analysis results of 6 core genes. Supplementary Table 6. Molecular docking results. [file 9363131.f1.zip › 9363131.f1/Supplementary Table 6.txt]

Gene ID	PBD codes	MOL ID	Compounds	Estimated ¦¤G (kcal/mol)	Baseline Estimated ¦¤G (DPA, kcal/mol)
CXCL8	4xdx	MOL000098	quercetin	-7.33	-6.37
MAPK1	4s30	MOL000098	quercetin	-7.36	-6.69
MAPK1	4s30	MOL000006	luteolin	-7.41	-6.69
MAPK1	4s30	MOL013352	Obacunone	-7.23	-6.69
MAPK1	4s30	MOL000785	palmatine	-7.74	-6.69
AKT1	2uzr	MOL000422	kaempferol	-6.92	-6.63
AKT1	2uzr	MOL000098	quercetin	-7.13	-6.63
AKT1	2uzr	MOL000006	luteolin	-7.24	-6.63
AKT1	2uzr	MOL000940	bisdemethoxycurcumin	-7.29	-6.63
SRC	4le9	MOL000906	wenjine	-7.22	-6.37
SRC	4le10	MOL007149	NSC 122421	-7.49	-6.37
VEGFA	1vpf	MOL000098	quercetin	-7.41	-6.79
VEGFA	1vpf	MOL000006	luteolin	-7.86	-6.79
IL-6	4j4l	MOL000098	quercetin	-7.5	-6.43
IL-6	4j4l	MOL000006	luteolin	-7.23	-6.43
